# Supplementary material for: Construction of sulfur-containing compounds with anti-cancer stem cell activity using thioacrolein derived from garlic based on nature-inspired scaffolds
Source: Royal Society of Chemistry journal article supplement (doi:10.1039/d1ob01992a), 2021-12-02
Supplement: d1ob01992a1.pdf [file d1ob01992a1.pdf]

Supporting Information

Construction of sulfur-containing compounds with anti-cancer stem cell activity using thioacrolein derived from garlic based on nature-inspired scaffolds

Taichi Yoneda,<sup>a</sup> Naoto Kojima,<sup>a</sup> Takahiro Matsumoto,<sup>a</sup> Daisuke Imahori,<sup>a</sup> Tomoe Ohta,<sup>b</sup> Tatsusada Yoshida,<sup>b</sup> Tetsushi Watanabe,<sup>a</sup> Hisashi Matsuda,<sup>a</sup> and Seikou Nakamura\*<sup>a</sup>

<sup>a</sup>Kyoto Pharmaceutical University, 1 Misasagi-Shichono-cho, Yamashina-ku, Kyoto 607-8412, Japan

<sup>b</sup>Faculty of Pharmaceutical Sciences, Nagasaki International University, 2825-7 Huis Ten Bosch-Cho, Sasebo, Nagasaki 859-3298, Japan

Contents

|          |                                                                                                     |
|----------|-----------------------------------------------------------------------------------------------------|
| S2       | Examination of allicin ( <b>4</b> ) extraction conditions.                                          |
| S3       | Examination of the reaction between allicin ( <b>4</b> )-containing fraction and dienes.            |
| S4       | Overview of synthesis of <b>5</b> .                                                                 |
| S5       | HPLC analysis chart of <b>anti-5/syn-5</b> .                                                        |
| S6       | Presumed regioisomers of thiopyranone.                                                              |
| S7-S50   | Computational data of DFT calculations for examination of regioselectivity of Diels-Alder reaction. |
| S51-S52  | The calculated ECD spectra and the measured ECD spectra of <b>5</b> .                               |
| S53-S56  | The DFT-optimized structures of conformers of <b>5</b> with their equilibrium population.           |
| S57-S104 | NMR spectroscopic data of synthesized compounds.                                                    |

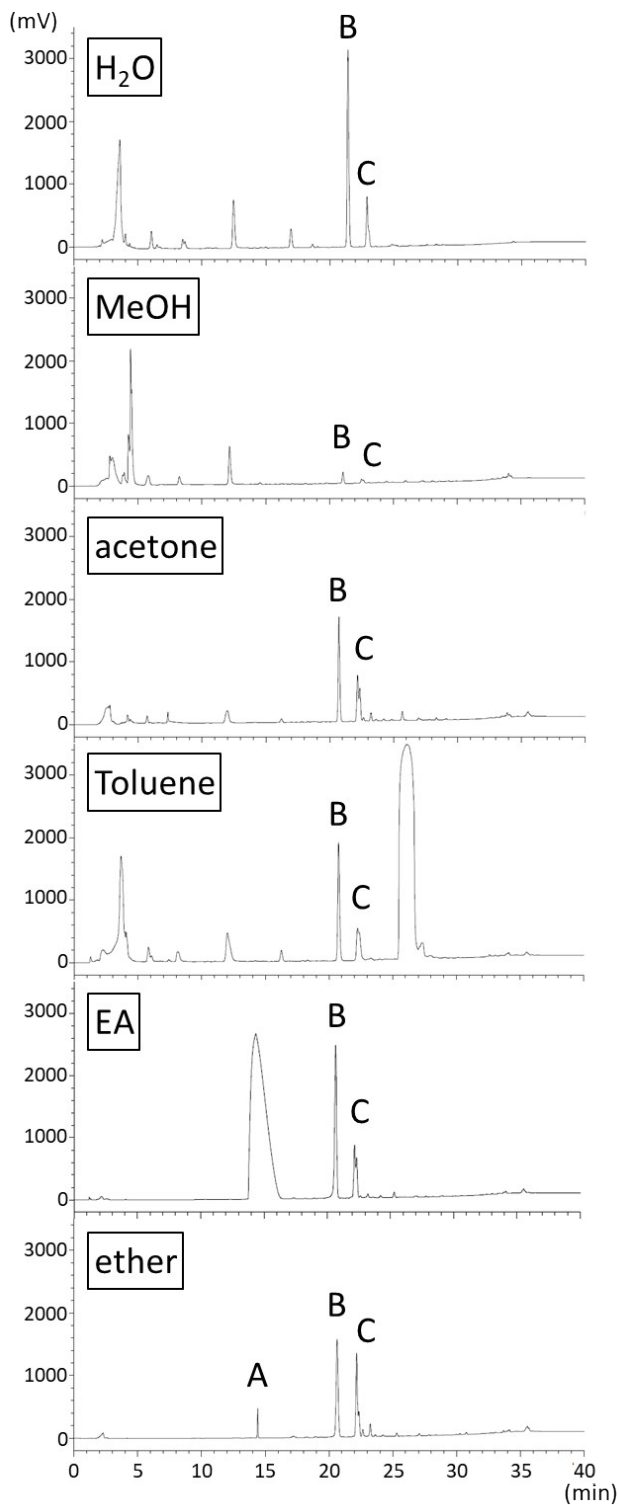

**Figure S1.** Examination of allicin (**4**) extraction conditions.

**[Sample preparation]**

The fresh whole bulb of *Allium sativum* was chopped and blended with solvents [distilled water (H<sub>2</sub>O), methanol (MeOH), acetone, toluene, ethyl acetate (EA), or diethyl ether (ether)] (3 mL / g) for 3 minutes in a mixer. Extracts were analyzed directly by LCMS.

**[Analysis conditions]**

System: Shimadzu LabSolutions  
 Column: YMC-triart PFP, 4.6×250 mm i.d.  
 Mobile phase A: H<sub>2</sub>O, B: MeOH,  
 gradient: mobile phase A–B  
 0.0–30.0 min: linear gradient with 90–10→0–100,  
 30.0–40.0min: linear gradient with 0–100→0–100  
 Detection: UV (210 nm) and ESI MS  
 Flow rate: 0.8 mL/min  
 Column oven: 40 °C  
 Sample injection: 10 mL

A: m/z 137 [M + H]<sup>+</sup>

B: m/z 163 [M + H]<sup>+</sup>

C: m/z 163 [M + H]<sup>+</sup>

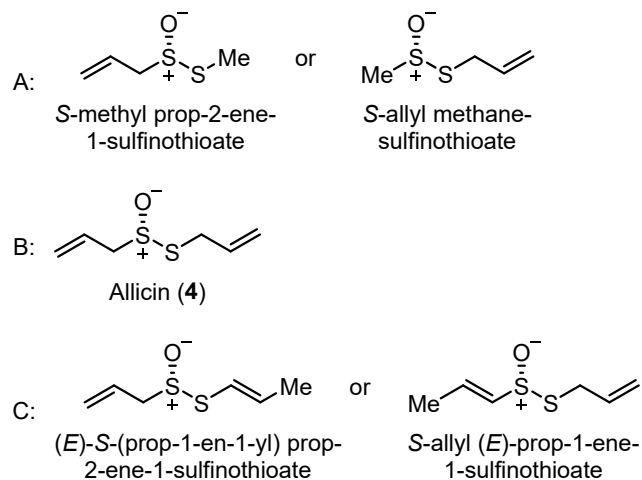

**Figure S2.** Structure of thiosulfinates derived from garlic.

**References**

- [1] E. Block, S. Naganathan, D. Putman and S. H. Zhao, *J. Agric. Food Chem.*, 1992, **40**, 2418–2430.

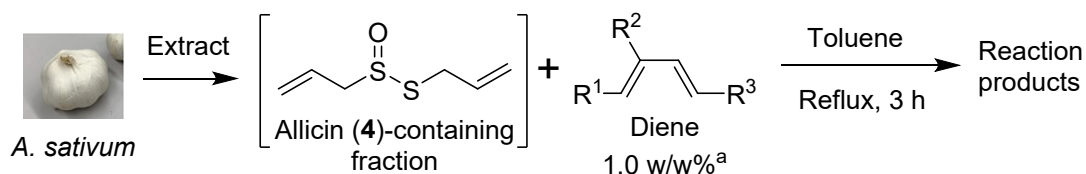

| Entry | Diene                                                                                                                                                              | Product           | Entry | Diene                                                                                                                                                                                                 | Product                                                                                                                                         |
|-------|--------------------------------------------------------------------------------------------------------------------------------------------------------------------|-------------------|-------|-------------------------------------------------------------------------------------------------------------------------------------------------------------------------------------------------------|-------------------------------------------------------------------------------------------------------------------------------------------------|
| 1     | 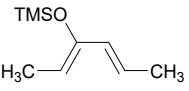<br>(( <i>2Z,4E</i> )-hexa-2,4-dien-3-yl)oxytrimethylsilane ( <b>6a</b> )         | none <sup>b</sup> | 5     | <br>( <i>E</i> )-4-(3-((trimethylsilyl)oxy)buta-1,3-dien-1-yl)phenol ( <b>6e</b> )                                  | none <sup>b</sup>                                                                                                                               |
| 2     | <br>( <i>E</i> )-trimethyl((5-methylhexa-1,3-dien-2-yl)oxy)silane ( <b>6b</b> )   | none <sup>b</sup> | 6     | <br>( <i>E</i> )-((4-methoxybuta-1,3-dien-2-yl)oxy)trimethylsilane ( <b>6f</b> )                                    | <br><b>5</b> (0.006% from <i>A. sativum</i> ) <sup>c</sup>   |
| 3     | <br>( <i>E</i> )-trimethyl(octa-1,3-dien-2-yl)oxy)silane ( <b>6c</b> )            | none <sup>b</sup> | 7     | <br>( <i>E</i> )-3-(( <i>tert</i> -butyldimethylsilyl)oxy)- <i>N,N</i> -dimethylbuta-1,3-dien-1-amine ( <b>6g</b> ) | <br><b>10</b> (0.0019% from <i>A. sativum</i> ) <sup>c</sup> |
| 4     | <br>( <i>E</i> )-trimethyl((4-phenylbuta-1,3-dien-2-yl)oxy)silane ( <b>6d</b> ) | none <sup>b</sup> |       |                                                                                                                                                                                                       |                                                                                                                                                 |

<sup>a</sup>Calculated from the fresh weight of garlic whole bulb. <sup>b</sup>No reaction product of *A. sativum*-derived component and diene was isolated. <sup>c</sup>Isolation yield from the fresh weight of garlic whole bulb.

**Figure S3.** Examination of the reaction between allicin (**4**)-containing fraction and dienes (**6**)





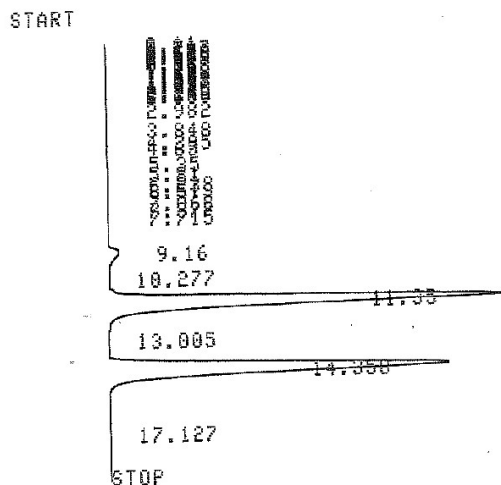

**Figure S5.** HPLC analysis chart of **anti-5**

[Analysis conditions]

Column: CHIRAL PAC AD-H, 4.6×250 mm i.d.

Mobile phase: *n*-Hexane : 2-Propanol = 60 : 40

Detection: UV (315 nm)

Flow rate: 1 mL/min

Sample preparation: **anti-5** 1.6 mg / 0.5 mL [*n*-Hexane : 2-Propanol = 60 : 40]

Sample injection: 10 μL

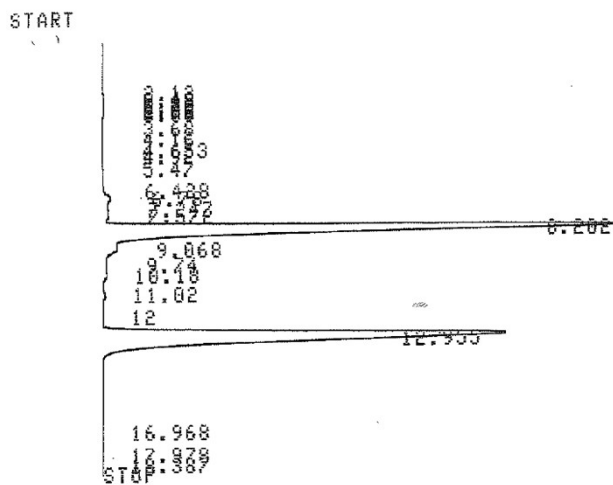

**Figure S6.** HPLC analysis chart of **syn-5**

[Analysis conditions]

Column: CHIRAL PAC AD-H, 4.6×250 mm i.d.

Mobile phase: *n*-Hexane : 2-Propanol = 50 : 50

Detection: UV (315 nm)

Flow rate: 1 mL/min

Sample preparation: **syn-5** 1.9 mg / 0.5 mL [*n*-Hexane : 2-Propanol = 50 : 50]

Sample injection: 10 μL

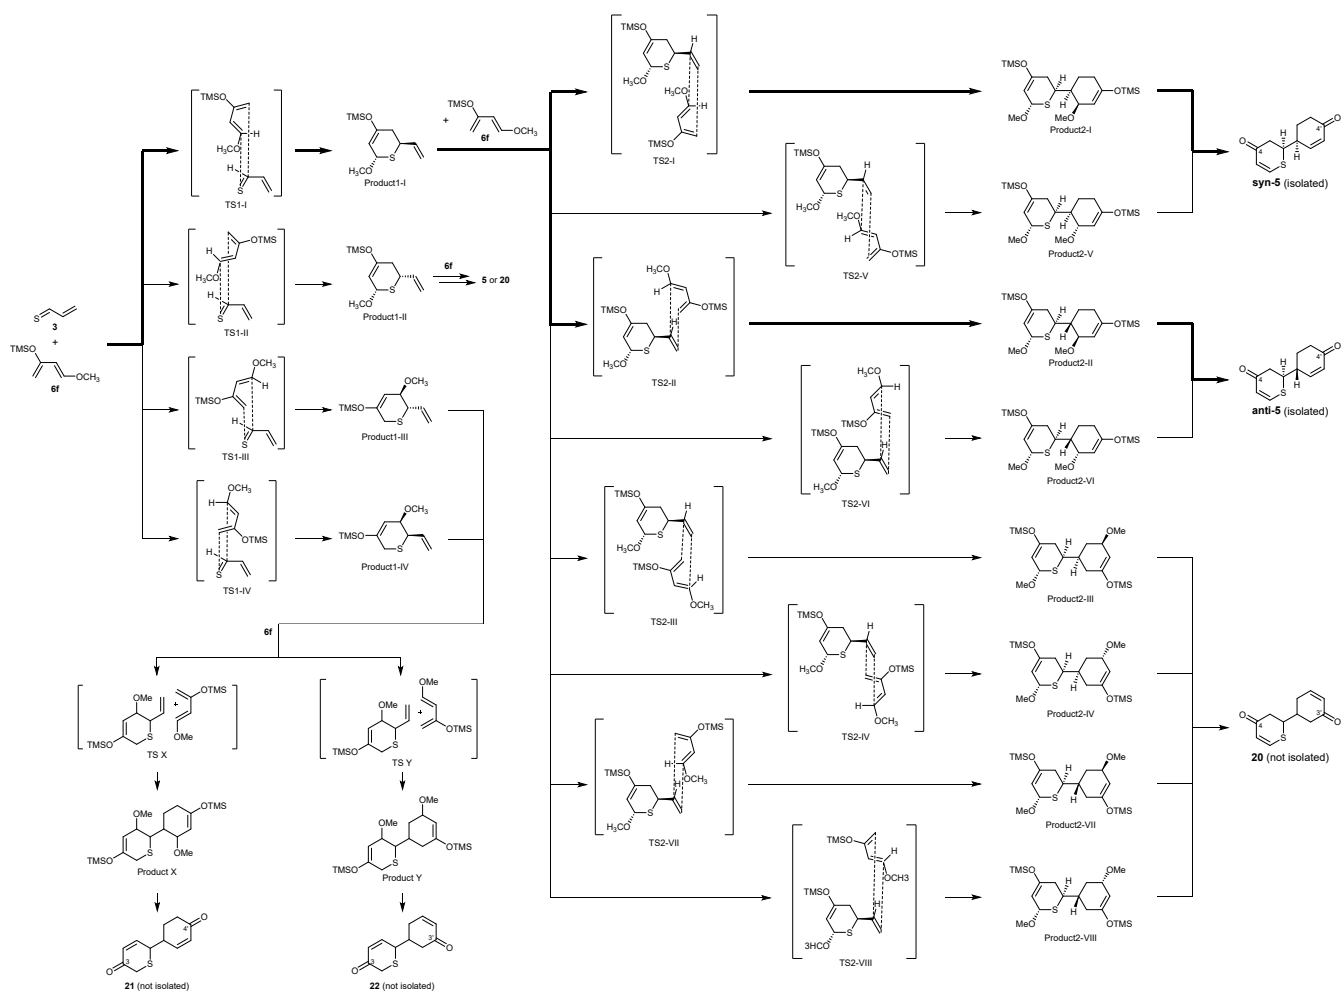

**Figure S7.** Presumed regioisomers of thiopyranone

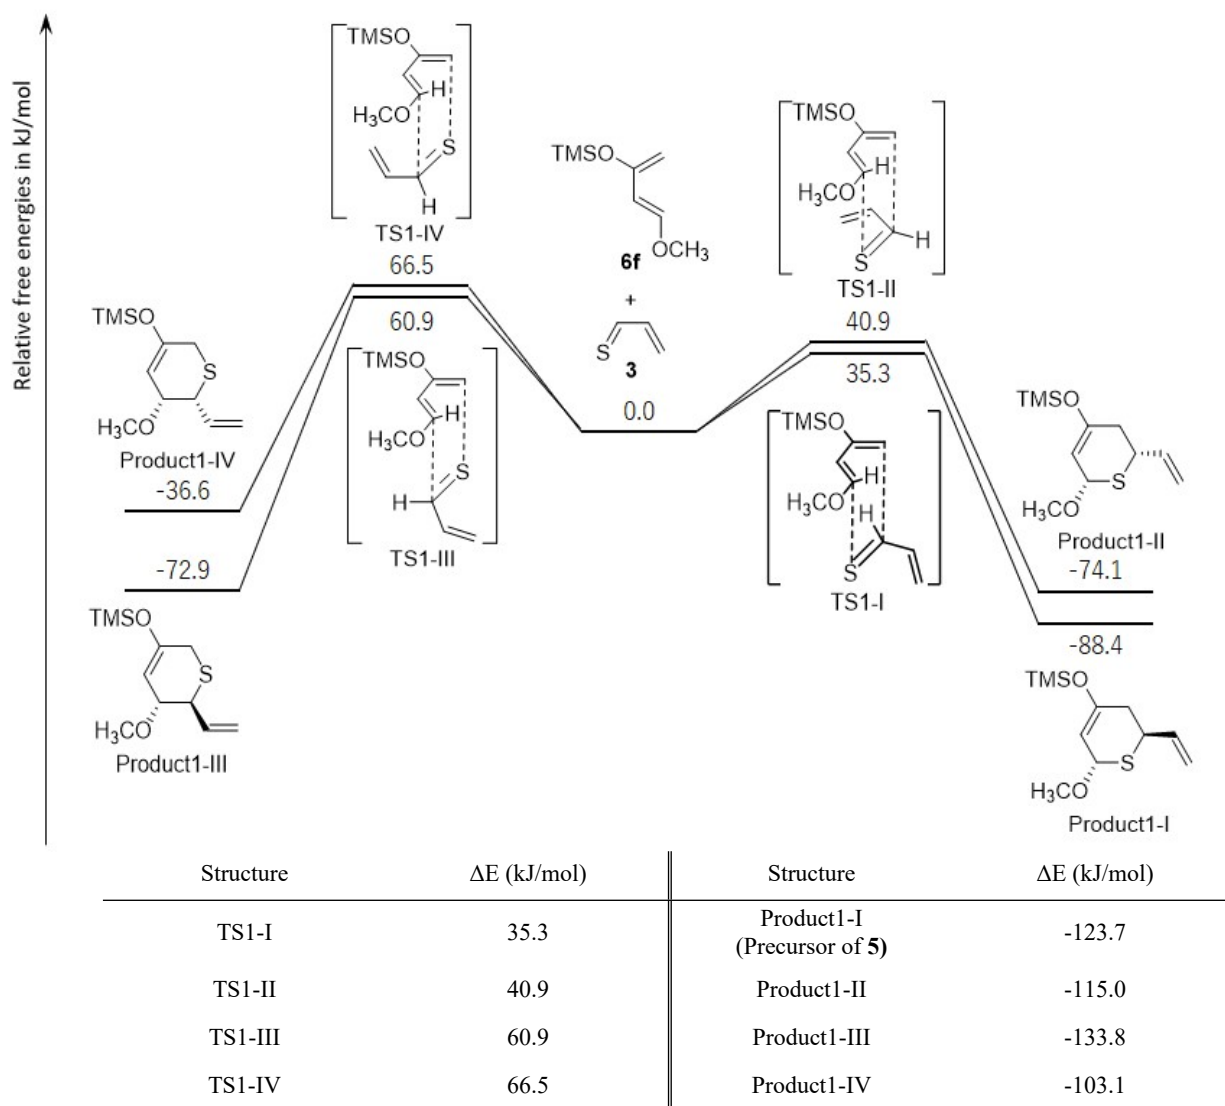

**Figure S8.** DFT computed Gibbs free energies and transition state structures for thio-Diels–Alder reactions of thioacrolein (**3**) and Danishefsky’s diene (**6f**).

### Thioacrolein (3)

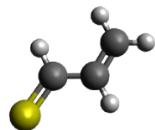

HF = -514.8848786 hartrees

Imaginary Frequencies: none found

Zero-point correction = 0.059696 (Hartree/Particle)

Temperature: 298.150 Kelvin. Pressure: 1.00000 Atm.

Sum of electronic and zero-point Energies = -514.825183 hartrees

Coordinates:

| Center<br>Number | Atomic<br>Number | Atomic<br>Type | Coordinates (Angstroms) |           |           |
|------------------|------------------|----------------|-------------------------|-----------|-----------|
|                  |                  |                | X                       | Y         | Z         |
| 1                | 16               | 0              | -1.656594               | -0.072050 | 0.000001  |
| 2                | 6                | 0              | -0.091167               | 0.434537  | -0.000004 |
| 3                | 1                | 0              | 0.122520                | 1.506639  | 0.000002  |
| 4                | 6                | 0              | 1.070620                | -0.423759 | -0.000002 |
| 5                | 1                | 0              | 0.901493                | -1.497391 | -0.000000 |
| 6                | 6                | 0              | 2.319250                | 0.081266  | 0.000000  |
| 7                | 1                | 0              | 3.192932                | -0.562084 | 0.000008  |
| 8                | 1                | 0              | 2.496337                | 1.153378  | 0.000005  |

### Danishefsky's diene (6f)

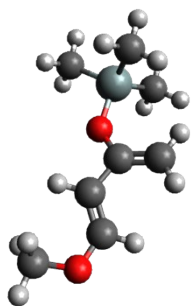

HF = -754.4783627 hartrees

Imaginary Frequencies: none found

Zero-point correction = 0.224657 (Hartree/Particle)

Temperature: 298.150 Kelvin. Pressure: 1.00000 Atm.

Sum of electronic and zero-point Energies = -754.253706 hartrees

Coordinates:

| Center<br>Number | Atomic<br>Number | Atomic<br>Type | Coordinates (Angstroms) |           |           |
|------------------|------------------|----------------|-------------------------|-----------|-----------|
|                  |                  |                | X                       | Y         | Z         |
| 1                | 6                | 0              | -0.240878               | -1.908538 | 0.279825  |
| 2                | 1                | 0              | 0.746187                | -2.343962 | 0.187264  |
| 3                | 1                | 0              | -1.057385               | -2.574843 | 0.527356  |
| 4                | 6                | 0              | -2.913480               | -0.596280 | -0.313309 |
| 5                | 6                | 0              | -0.473981               | -0.595474 | 0.094874  |
| 6                | 6                | 0              | -1.804627               | 0.031487  | 0.116658  |
| 7                | 1                | 0              | -1.838060               | 1.058242  | 0.465635  |
| 8                | 8                | 0              | 0.503773                | 0.339639  | -0.135439 |
| 9                | 14               | 0              | 2.198266                | 0.245035  | -0.027385 |
| 10               | 6                | 0              | 2.709812                | -0.347698 | 1.685069  |
| 11               | 1                | 0              | 2.335425                | 0.329928  | 2.459705  |
| 12               | 1                | 0              | 2.334760                | -1.350814 | 1.906812  |
| 13               | 1                | 0              | 3.802678                | -0.372326 | 1.763399  |
| 14               | 6                | 0              | 2.744201                | 2.019590  | -0.310154 |
| 15               | 1                | 0              | 2.418310                | 2.383226  | -1.290152 |
| 16               | 1                | 0              | 2.331163                | 2.687674  | 0.452587  |
| 17               | 1                | 0              | 3.836177                | 2.099319  | -0.269872 |
| 18               | 6                | 0              | 2.883222                | -0.870965 | -1.381742 |
| 19               | 1                | 0              | 3.978752                | -0.835162 | -1.377515 |
| 20               | 1                | 0              | 2.585031                | -1.916619 | -1.261258 |
| 21               | 1                | 0              | 2.544067                | -0.537266 | -2.368251 |
| 22               | 8                | 0              | -4.184550               | -0.133278 | -0.313008 |
| 23               | 1                | 0              | -2.877130               | -1.597696 | -0.732128 |
| 24               | 6                | 0              | -4.408606               | 1.167509  | 0.230465  |
| 25               | 1                | 0              | -5.483172               | 1.341139  | 0.172994  |
| 26               | 1                | 0              | -4.079545               | 1.217599  | 1.274688  |
| 27               | 1                | 0              | -3.880746               | 1.932394  | -0.350419 |

TS1-I

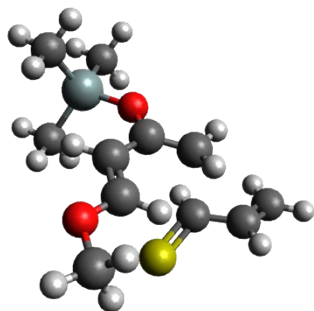

HF = -1269.351052 hartrees  
 Imaginary Frequencies: 1 (-289.7197 1/cm)  
 Zero-point correction = 0.285591 (Hartree/Particle)  
 Temperature: 298.150 Kelvin. Pressure: 1.00000 Atm.  
 Sum of electronic and zero-point Energies = -1269.065461 hartrees

Coordinates:

| Center Number | Atomic Number | Atomic Type | Coordinates (Angstroms) |           |           |
|---------------|---------------|-------------|-------------------------|-----------|-----------|
|               |               |             | X                       | Y         | Z         |
| 1             | 6             | 0           | 1.242446                | 1.872656  | -0.548630 |
| 2             | 6             | 0           | 0.011130                | 1.289170  | -0.515198 |
| 3             | 1             | 0           | -0.804430               | 1.877146  | -0.109750 |
| 4             | 6             | 0           | -0.229230               | -0.069417 | -0.892654 |
| 5             | 6             | 0           | 0.743867                | -0.925548 | -1.383746 |
| 6             | 1             | 0           | 0.433564                | -1.909157 | -1.711808 |
| 7             | 1             | 0           | 1.631459                | -0.520723 | -1.850097 |
| 8             | 16            | 0           | 2.451729                | -0.289484 | 1.340593  |
| 9             | 6             | 0           | 1.870729                | -1.613198 | 0.445591  |
| 10            | 8             | 0           | -1.444830               | -0.613906 | -0.666172 |
| 11            | 14            | 0           | -2.865446               | -0.133205 | 0.161573  |
| 12            | 6             | 0           | -3.672707               | 1.303804  | -0.746134 |
| 13            | 1             | 0           | -3.082120               | 2.223920  | -0.704883 |
| 14            | 1             | 0           | -3.837917               | 1.055827  | -1.799829 |
| 15            | 1             | 0           | -4.649779               | 1.518768  | -0.298375 |
| 16            | 6             | 0           | -3.937020               | -1.668417 | 0.057794  |
| 17            | 1             | 0           | -3.457409               | -2.520434 | 0.550012  |
| 18            | 1             | 0           | -4.901720               | -1.496791 | 0.547748  |
| 19            | 1             | 0           | -4.133994               | -1.944453 | -0.983061 |
| 20            | 6             | 0           | -2.459197               | 0.294240  | 1.946543  |
| 21            | 1             | 0           | -1.958215               | -0.542421 | 2.444170  |
| 22            | 1             | 0           | -1.814305               | 1.172992  | 2.036738  |
| 23            | 1             | 0           | -3.385180               | 0.502720  | 2.494729  |
| 24            | 8             | 0           | 1.403047                | 3.129828  | -0.124970 |
| 25            | 1             | 0           | 2.119096                | 1.383728  | -0.960760 |
| 26            | 6             | 0           | 2.746780                | 3.639010  | -0.164097 |
| 27            | 1             | 0           | 3.129502                | 3.641704  | -1.189327 |
| 28            | 1             | 0           | 2.696341                | 4.659870  | 0.212220  |
| 29            | 1             | 0           | 3.398676                | 3.037086  | 0.476140  |
| 30            | 6             | 0           | 2.797383                | -2.487192 | -0.288614 |
| 31            | 1             | 0           | 3.722777                | -2.022725 | -0.624142 |
| 32            | 6             | 0           | 2.580659                | -3.793003 | -0.501004 |
| 33            | 1             | 0           | 1.669931                | -4.281798 | -0.163800 |
| 34            | 1             | 0           | 3.312955                | -4.414510 | -1.006450 |
| 35            | 1             | 0           | 0.964579                | -2.104136 | 0.799058  |

## Product1-I

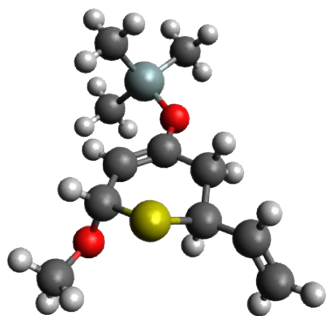

HF = -1269.4023132 hartrees

Imaginary Frequencies: none found

Zero-point correction = 0.289751 (Hartree/Particle)

Temperature: 298.150 Kelvin. Pressure: 1.00000 Atm.

Sum of electronic and zero-point Energies = -1269.112562 hartrees

Coordinates:

| Center Number | Atomic Number | Atomic Type | Coordinates (Angstroms) |           |           |
|---------------|---------------|-------------|-------------------------|-----------|-----------|
|               |               |             | X                       | Y         | Z         |
| 1             | 6             | 0           | -1.297433               | -1.493902 | -0.409422 |
| 2             | 6             | 0           | 0.061463                | -0.916863 | -0.139139 |
| 3             | 1             | 0           | 0.843573                | -1.662850 | -0.035592 |
| 4             | 6             | 0           | 0.361321                | 0.383786  | 0.007794  |
| 5             | 6             | 0           | -0.627797               | 1.521133  | -0.038149 |
| 6             | 1             | 0           | -0.349462               | 2.230641  | 0.750893  |
| 7             | 1             | 0           | -0.510157               | 2.056253  | -0.990428 |
| 8             | 16            | 0           | -2.523844               | -0.244250 | -1.031000 |
| 9             | 6             | 0           | -2.091060               | 1.113938  | 0.157870  |
| 10            | 8             | 0           | 1.621495                | 0.855845  | 0.222196  |
| 11            | 14            | 0           | 3.160643                | 0.140813  | 0.045284  |
| 12            | 6             | 0           | 3.335247                | -0.571850 | -1.687446 |
| 13            | 1             | 0           | 2.612193                | -1.368522 | -1.884570 |
| 14            | 1             | 0           | 3.194820                | 0.205882  | -2.445412 |
| 15            | 1             | 0           | 4.339244                | -0.990348 | -1.820775 |
| 16            | 6             | 0           | 4.328181                | 1.587262  | 0.304245  |
| 17            | 1             | 0           | 4.194069                | 2.031854  | 1.295754  |
| 18            | 1             | 0           | 5.370751                | 1.260712  | 0.222213  |
| 19            | 1             | 0           | 4.161725                | 2.369900  | -0.442906 |
| 20            | 6             | 0           | 3.434146                | -1.168489 | 1.370575  |
| 21            | 1             | 0           | 3.249436                | -0.757603 | 2.368754  |
| 22            | 1             | 0           | 2.791031                | -2.044453 | 1.243980  |
| 23            | 1             | 0           | 4.474031                | -1.513930 | 1.340859  |
| 24            | 8             | 0           | -1.728935               | -2.157521 | 0.766003  |
| 25            | 1             | 0           | -1.237132               | -2.216103 | -1.237103 |
| 26            | 6             | 0           | -2.756395               | -3.117532 | 0.550853  |
| 27            | 1             | 0           | -2.437394               | -3.891083 | -0.162551 |
| 28            | 1             | 0           | -2.960692               | -3.584060 | 1.516563  |
| 29            | 1             | 0           | -3.674618               | -2.648559 | 0.175715  |
| 30            | 6             | 0           | -3.032732               | 2.264367  | -0.052704 |
| 31            | 1             | 0           | -2.947052               | 2.778484  | -1.010148 |
| 32            | 6             | 0           | -3.927553               | 2.678880  | 0.844752  |
| 33            | 1             | 0           | -4.038818               | 2.188783  | 1.808894  |
| 34            | 1             | 0           | -4.579918               | 3.523950  | 0.646761  |
| 35            | 1             | 0           | -2.227915               | 0.696684  | 1.160163  |

TS1-II

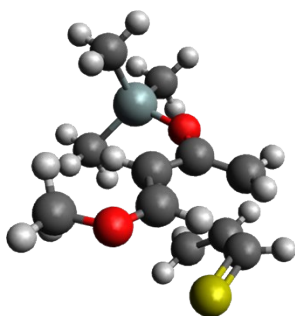

HF = -1269.3500071 hartrees

Imaginary Frequencies: 1 (-298.2156 1/cm)

Zero-point correction = 0.286709 (Hartree/Particle)

Temperature: 298.150 Kelvin. Pressure: 1.00000 Atm.

Sum of electronic and zero-point Energies = -1269.063298 hartrees

Coordinates:

| Center Number | Atomic Number | Atomic Type | Coordinates (Angstroms) |           |           |
|---------------|---------------|-------------|-------------------------|-----------|-----------|
|               |               |             | X                       | Y         | Z         |
| 1             | 6             | 0           | 1.697333                | 1.722984  | -0.620217 |
| 2             | 6             | 0           | 0.447248                | 1.200021  | -0.452806 |
| 3             | 1             | 0           | -0.238802               | 1.680524  | 0.232093  |
| 4             | 6             | 0           | 0.007272                | -0.005494 | -1.092313 |
| 5             | 6             | 0           | 0.811106                | -0.812526 | -1.886567 |
| 6             | 1             | 0           | 0.332311                | -1.637077 | -2.401812 |
| 7             | 1             | 0           | 1.690372                | -0.396738 | -2.357821 |
| 8             | 16            | 0           | 3.169183                | -0.905758 | 0.327000  |
| 9             | 6             | 0           | 2.066260                | -1.945952 | -0.446123 |
| 10            | 1             | 0           | 2.415404                | -2.431247 | -1.356467 |
| 11            | 6             | 0           | 1.007647                | -2.707167 | 0.246326  |
| 12            | 1             | 0           | 0.424098                | -3.366455 | -0.395051 |
| 13            | 6             | 0           | 0.736228                | -2.666811 | 1.557392  |
| 14            | 1             | 0           | -0.050138               | -3.280278 | 1.985626  |
| 15            | 1             | 0           | 1.306155                | -2.032405 | 2.229178  |
| 16            | 8             | 0           | -1.227748               | -0.473339 | -0.830197 |
| 17            | 14            | 0           | -2.580649               | 0.044838  | 0.084638  |
| 18            | 6             | 0           | -3.209933               | 1.671879  | -0.618748 |
| 19            | 1             | 0           | -2.483010               | 2.483744  | -0.519312 |
| 20            | 1             | 0           | -3.456410               | 1.568675  | -1.680551 |
| 21            | 1             | 0           | -4.121732               | 1.976566  | -0.092621 |
| 22            | 6             | 0           | -3.814024               | -1.338338 | -0.195451 |
| 23            | 1             | 0           | -3.431639               | -2.291919 | 0.182109  |
| 24            | 1             | 0           | -4.755007               | -1.124495 | 0.323107  |
| 25            | 1             | 0           | -4.037133               | -1.459745 | -1.260178 |
| 26            | 6             | 0           | -2.136109               | 0.188247  | 1.906676  |
| 27            | 1             | 0           | -1.472247               | 1.029794  | 2.125412  |
| 28            | 1             | 0           | -3.051257               | 0.328659  | 2.493540  |
| 29            | 1             | 0           | -1.647230               | -0.725369 | 2.259224  |
| 30            | 8             | 0           | 2.194466                | 2.809268  | -0.026277 |
| 31            | 1             | 0           | 2.409546                | 1.318902  | -1.328153 |
| 32            | 6             | 0           | 1.413051                | 3.463431  | 0.983024  |
| 33            | 1             | 0           | 1.178631                | 2.769979  | 1.796448  |
| 34            | 1             | 0           | 2.031757                | 4.278499  | 1.355510  |
| 35            | 1             | 0           | 0.488266                | 3.865709  | 0.557416  |



## Product1-II

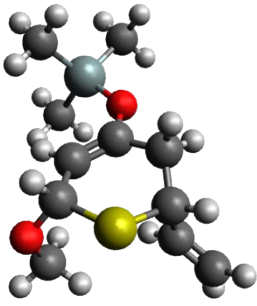

HF = - 1269.3973179 hartrees

Imaginary Frequencies: none found

Zero-point correction = 0.290231 (Hartree/Particle)

Temperature: 298.150 Kelvin. Pressure: 1.00000 Atm.

Sum of electronic and zero-point Energies = -1269.107087 hartrees

Coordinates:

| Center Number | Atomic Number | Atomic Type | Coordinates (Angstroms) |           |           |
|---------------|---------------|-------------|-------------------------|-----------|-----------|
|               |               |             | X                       | Y         | Z         |
| 1             | 6             | 0           | 1.421980                | 1.519976  | -0.682599 |
| 2             | 6             | 0           | 0.108795                | 0.885875  | -0.320669 |
| 3             | 1             | 0           | -0.617499               | 1.608905  | 0.040531  |
| 4             | 6             | 0           | -0.252879               | -0.399327 | -0.474430 |
| 5             | 6             | 0           | 0.657075                | -1.501449 | -0.959082 |
| 6             | 1             | 0           | 0.285781                | -2.444490 | -0.543775 |
| 7             | 1             | 0           | 0.580046                | -1.583102 | -2.050346 |
| 8             | 16            | 0           | 2.761843                | 0.314871  | -1.171406 |
| 9             | 6             | 0           | 2.130061                | -1.326771 | -0.562964 |
| 10            | 1             | 0           | 2.732447                | -2.036188 | -1.138231 |
| 11            | 6             | 0           | 2.377925                | -1.554901 | 0.901929  |
| 12            | 1             | 0           | 1.754269                | -0.986558 | 1.588831  |
| 13            | 6             | 0           | 3.282182                | -2.410034 | 1.382527  |
| 14            | 1             | 0           | 3.419261                | -2.551432 | 2.450377  |
| 15            | 1             | 0           | 3.920699                | -2.996819 | 0.726022  |
| 16            | 8             | 0           | -1.504358               | -0.873363 | -0.222172 |
| 17            | 14            | 0           | -2.987707               | -0.095718 | 0.110388  |
| 18            | 6             | 0           | -3.396005               | 1.123692  | -1.263501 |
| 19            | 1             | 0           | -2.677943               | 1.946379  | -1.324558 |
| 20            | 1             | 0           | -3.417258               | 0.621673  | -2.236483 |
| 21            | 1             | 0           | -4.387311               | 1.558249  | -1.091609 |
| 22            | 6             | 0           | -4.210563               | -1.518770 | 0.132083  |
| 23            | 1             | 0           | -3.948960               | -2.254573 | 0.899370  |
| 24            | 1             | 0           | -5.221133               | -1.154808 | 0.347836  |
| 25            | 1             | 0           | -4.238287               | -2.032518 | -0.834227 |
| 26            | 6             | 0           | -2.917403               | 0.741469  | 1.795279  |
| 27            | 1             | 0           | -2.202355               | 1.568760  | 1.829720  |
| 28            | 1             | 0           | -3.903736               | 1.144871  | 2.051737  |
| 29            | 1             | 0           | -2.639610               | 0.023910  | 2.574603  |
| 30            | 8             | 0           | 1.854805                | 2.472704  | 0.273731  |
| 31            | 1             | 0           | 1.301662                | 2.125208  | -1.587309 |
| 32            | 6             | 0           | 2.076985                | 1.990241  | 1.593089  |
| 33            | 1             | 0           | 2.878609                | 1.241942  | 1.615662  |
| 34            | 1             | 0           | 2.377846                | 2.854564  | 2.188642  |
| 35            | 1             | 0           | 1.169386                | 1.553406  | 2.027818  |

TS1-III

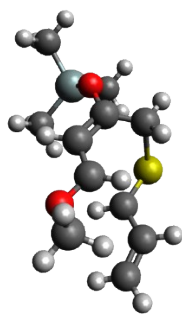

HF = -1269.3412107 hartrees  
 Imaginary Frequencies: 1 (-303.7707 1/cm)  
 Zero-point correction = 0.285518 (Hartree/Particle)  
 Temperature: 298.150 Kelvin. Pressure: 1.00000 Atm.  
 Sum of electronic and zero-point Energies = -1269.055693 hartrees

Coordinates:

| Center Number | Atomic Number | Atomic Type | Coordinates (Angstroms) |           |           |
|---------------|---------------|-------------|-------------------------|-----------|-----------|
|               |               |             | X                       | Y         | Z         |
| 1             | 6             | 0           | 1.699291                | 1.126559  | -0.470309 |
| 2             | 6             | 0           | 0.316891                | 1.268416  | -0.448742 |
| 3             | 1             | 0           | -0.102420               | 2.031362  | 0.199463  |
| 4             | 6             | 0           | -0.546143               | 0.387537  | -1.103506 |
| 5             | 6             | 0           | -0.066590               | -0.757954 | -1.794502 |
| 6             | 1             | 0           | -0.819625               | -1.371550 | -2.281022 |
| 7             | 1             | 0           | 0.843656                | -0.653353 | -2.374740 |
| 8             | 8             | 0           | -1.890181               | 0.544845  | -0.967129 |
| 9             | 14            | 0           | -2.955421               | 0.187654  | 0.318421  |
| 10            | 6             | 0           | -4.459015               | 1.250031  | -0.046829 |
| 11            | 1             | 0           | -4.209964               | 2.315810  | -0.021754 |
| 12            | 1             | 0           | -4.873687               | 1.022177  | -1.034237 |
| 13            | 1             | 0           | -5.245330               | 1.070953  | 0.694833  |
| 14            | 6             | 0           | -3.385992               | -1.641244 | 0.259225  |
| 15            | 1             | 0           | -2.495807               | -2.260101 | 0.409414  |
| 16            | 1             | 0           | -4.108413               | -1.890824 | 1.044915  |
| 17            | 1             | 0           | -3.831593               | -1.912200 | -0.703717 |
| 18            | 6             | 0           | -2.171155               | 0.636657  | 1.967900  |
| 19            | 1             | 0           | -1.235216               | 0.093580  | 2.132540  |
| 20            | 1             | 0           | -1.962341               | 1.708610  | 2.043672  |
| 21            | 1             | 0           | -2.855276               | 0.372207  | 2.782477  |
| 22            | 8             | 0           | 2.448476                | 1.943607  | 0.290770  |
| 23            | 1             | 0           | 2.217189                | 0.602334  | -1.266038 |
| 24            | 6             | 0           | 3.748635                | 2.278710  | -0.225020 |
| 25            | 1             | 0           | 4.265310                | 1.387300  | -0.586278 |
| 26            | 1             | 0           | 3.653778                | 3.014039  | -1.031465 |
| 27            | 1             | 0           | 4.306765                | 2.713320  | 0.604188  |
| 28            | 6             | 0           | 1.894280                | -1.144594 | 0.539946  |
| 29            | 1             | 0           | 1.632383                | -0.701431 | 1.498229  |
| 30            | 6             | 0           | 3.306183                | -1.355649 | 0.285247  |
| 31            | 1             | 0           | 3.554384                | -1.857262 | -0.650652 |
| 32            | 6             | 0           | 4.303403                | -0.991908 | 1.116824  |
| 33            | 1             | 0           | 4.102127                | -0.508415 | 2.069254  |
| 34            | 1             | 0           | 5.343153                | -1.180671 | 0.870227  |
| 35            | 16            | 0           | 0.680733                | -2.054376 | -0.245483 |

### Product1-III

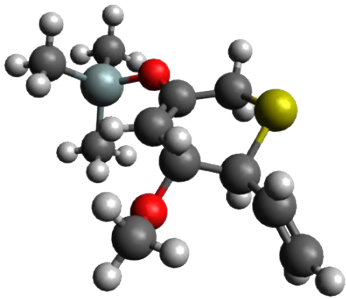

HF = - 1269.3962618 hartrees  
Imaginary Frequencies: none found  
Zero-point correction = 0.289612 (Hartree/Particle)  
Temperature: 298.150 Kelvin. Pressure: 1.00000 Atm.  
Sum of electronic and zero-point Energies = -1269.106650 hartrees

#### Coordinates:

| Center Number | Atomic Number | Atomic Type | Coordinates (Angstroms) |           |           |
|---------------|---------------|-------------|-------------------------|-----------|-----------|
|               |               |             | X                       | Y         | Z         |
| 1             | 6             | 0           | 1.539171                | 0.697075  | -0.472993 |
| 2             | 6             | 0           | 0.051879                | 0.440811  | -0.476011 |
| 3             | 1             | 0           | -0.542696               | 1.331944  | -0.650246 |
| 4             | 6             | 0           | -0.564084               | -0.733025 | -0.278394 |
| 5             | 6             | 0           | 0.122711                | -2.056668 | -0.059638 |
| 6             | 1             | 0           | -0.031276               | -2.385075 | 0.974845  |
| 7             | 1             | 0           | -0.339795               | -2.806627 | -0.708312 |
| 8             | 8             | 0           | -1.919254               | -0.901821 | -0.242190 |
| 9             | 14            | 0           | -3.176389               | 0.185595  | 0.143441  |
| 10            | 6             | 0           | -4.662213               | -0.940889 | 0.359093  |
| 11            | 1             | 0           | -4.868305               | -1.503990 | -0.557019 |
| 12            | 1             | 0           | -4.500918               | -1.659626 | 1.168939  |
| 13            | 1             | 0           | -5.557226               | -0.357151 | 0.601006  |
| 14            | 6             | 0           | -2.758646               | 1.089433  | 1.739479  |
| 15            | 1             | 0           | -1.830365               | 1.662050  | 1.656388  |
| 16            | 1             | 0           | -3.562243               | 1.787980  | 1.998323  |
| 17            | 1             | 0           | -2.647462               | 0.385362  | 2.570765  |
| 18            | 6             | 0           | -3.467859               | 1.384606  | -1.279337 |
| 19            | 1             | 0           | -2.639894               | 2.085945  | -1.420322 |
| 20            | 1             | 0           | -3.616390               | 0.845265  | -2.220854 |
| 21            | 1             | 0           | -4.371811               | 1.974649  | -1.088564 |
| 22            | 8             | 0           | 1.733100                | 1.947306  | 0.206248  |
| 23            | 1             | 0           | 1.904664                | 0.792077  | -1.507997 |
| 24            | 6             | 0           | 2.651939                | 2.834091  | -0.417554 |
| 25            | 1             | 0           | 3.671191                | 2.429957  | -0.440828 |
| 26            | 1             | 0           | 2.345218                | 3.077633  | -1.444862 |
| 27            | 1             | 0           | 2.653015                | 3.752387  | 0.175112  |
| 28            | 6             | 0           | 2.359054                | -0.400748 | 0.236947  |
| 29            | 1             | 0           | 2.090876                | -0.397503 | 1.298154  |
| 30            | 6             | 0           | 3.843970                | -0.238114 | 0.080061  |
| 31            | 1             | 0           | 4.211718                | -0.187579 | -0.944925 |
| 32            | 6             | 0           | 4.704932                | -0.170934 | 1.096550  |
| 33            | 1             | 0           | 4.372980                | -0.222825 | 2.130396  |
| 34            | 1             | 0           | 5.771883                | -0.058963 | 0.929354  |
| 35            | 16            | 0           | 1.907525                | -2.058871 | -0.463076 |

TS1-IV

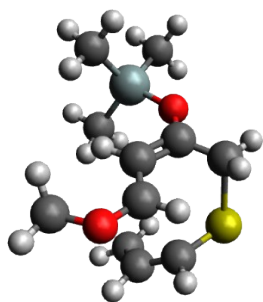

HF = -1269.339 8135 hartrees  
 Imaginary Frequencies: 1 (-263.0759 1/cm)  
 Zero-point correction = 0.286249 (Hartree/Particle)  
 Temperature: 298.150 Kelvin. Pressure: 1.00000 Atm.  
 Sum of electronic and zero-point Energies = -1269.053565 hartrees

Coordinates:

| Center Number | Atomic Number | Atomic Type | Coordinates (Angstroms) |           |           |
|---------------|---------------|-------------|-------------------------|-----------|-----------|
|               |               |             | X                       | Y         | Z         |
| 1             | 6             | 0           | 1.712999                | 1.059785  | -1.089971 |
| 2             | 6             | 0           | 0.378071                | 0.810326  | -0.806305 |
| 3             | 1             | 0           | -0.169407               | 1.515847  | -0.194837 |
| 4             | 6             | 0           | -0.237837               | -0.404731 | -1.145959 |
| 5             | 6             | 0           | 0.488110                | -1.450800 | -1.780772 |
| 6             | 1             | 0           | -0.088605               | -2.341219 | -2.014989 |
| 7             | 1             | 0           | 1.176462                | -1.165599 | -2.568065 |
| 8             | 8             | 0           | -1.491342               | -0.713898 | -0.746719 |
| 9             | 14            | 0           | -2.678919               | 0.068939  | 0.204934  |
| 10            | 6             | 0           | -3.125633               | 1.727770  | -0.565368 |
| 11            | 1             | 0           | -2.317002               | 2.462708  | -0.512160 |
| 12            | 1             | 0           | -3.401910               | 1.607107  | -1.618126 |
| 13            | 1             | 0           | -3.990660               | 2.151110  | -0.041932 |
| 14            | 6             | 0           | -4.129241               | -1.115171 | 0.111542  |
| 15            | 1             | 0           | -3.858435               | -2.102278 | 0.499445  |
| 16            | 1             | 0           | -4.969834               | -0.739836 | 0.705479  |
| 17            | 1             | 0           | -4.475559               | -1.238569 | -0.919547 |
| 18            | 6             | 0           | -2.062381               | 0.251416  | 1.971154  |
| 19            | 1             | 0           | -1.098142               | 0.764435  | 2.033296  |
| 20            | 1             | 0           | -2.786594               | 0.821325  | 2.564148  |
| 21            | 1             | 0           | -1.943736               | -0.730478 | 2.440693  |
| 22            | 8             | 0           | 2.390160                | 2.172259  | -0.758504 |
| 23            | 1             | 0           | 2.253639                | 0.502402  | -1.841437 |
| 24            | 6             | 0           | 1.794591                | 3.089138  | 0.167767  |
| 25            | 1             | 0           | 1.532167                | 2.583259  | 1.100963  |
| 26            | 1             | 0           | 2.550117                | 3.850447  | 0.359471  |
| 27            | 1             | 0           | 0.904732                | 3.558728  | -0.265157 |
| 28            | 16            | 0           | 1.889735                | -2.200484 | -0.343699 |
| 29            | 6             | 0           | 2.742511                | -0.849872 | 0.248822  |
| 30            | 1             | 0           | 3.647967                | -0.561756 | -0.278518 |
| 31            | 6             | 0           | 2.591306                | -0.317037 | 1.593204  |
| 32            | 1             | 0           | 3.309620                | 0.468668  | 1.834789  |
| 33            | 6             | 0           | 1.702895                | -0.667697 | 2.544939  |
| 34            | 1             | 0           | 1.699007                | -0.175528 | 3.511953  |
| 35            | 1             | 0           | 0.972387                | -1.453825 | 2.382100  |

## Product1-IV

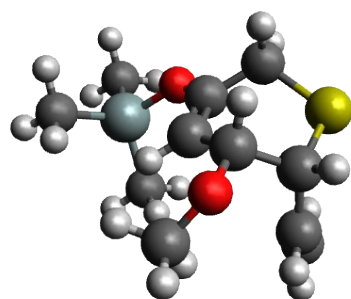

HF = -1269.3827537 hartrees

Imaginary Frequencies: none found

Zero-point correction = 0.289907 (Hartree/Particle)

Temperature: 298.150 Kelvin. Pressure: 1.00000 Atm.

Sum of electronic and zero-point Energies = -1269.092847 hartrees

Coordinates:

| Center Number | Atomic Number | Atomic Type | Coordinates (Angstroms) |           |           |
|---------------|---------------|-------------|-------------------------|-----------|-----------|
|               |               |             | X                       | Y         | Z         |
| 1             | 6             | 0           | 1.833674                | 0.614282  | -0.976919 |
| 2             | 6             | 0           | 0.350270                | 0.563856  | -0.714342 |
| 3             | 1             | 0           | -0.173948               | 1.467065  | -0.433659 |
| 4             | 6             | 0           | -0.286909               | -0.614667 | -0.805243 |
| 5             | 6             | 0           | 0.469499                | -1.847004 | -1.215171 |
| 6             | 1             | 0           | -0.135765               | -2.737558 | -1.041367 |
| 7             | 1             | 0           | 0.732779                | -1.809359 | -2.276948 |
| 8             | 8             | 0           | -1.608238               | -0.846446 | -0.577874 |
| 9             | 14            | 0           | -2.799846               | 0.117334  | 0.175197  |
| 10            | 6             | 0           | -3.145858               | 1.658250  | -0.850805 |
| 11            | 1             | 0           | -2.315158               | 2.370189  | -0.850119 |
| 12            | 1             | 0           | -3.361552               | 1.394026  | -1.891485 |
| 13            | 1             | 0           | -4.025169               | 2.176740  | -0.451434 |
| 14            | 6             | 0           | -4.302649               | -1.005591 | 0.195255  |
| 15            | 1             | 0           | -4.101183               | -1.927537 | 0.749994  |
| 16            | 1             | 0           | -5.151120               | -0.504200 | 0.673848  |
| 17            | 1             | 0           | -4.605981               | -1.280221 | -0.820239 |
| 18            | 6             | 0           | -2.236454               | 0.546637  | 1.918078  |
| 19            | 1             | 0           | -1.260435               | 1.040861  | 1.924579  |
| 20            | 1             | 0           | -2.957211               | 1.217909  | 2.398182  |
| 21            | 1             | 0           | -2.157784               | -0.355820 | 2.533144  |
| 22            | 8             | 0           | 2.430651                | 1.910435  | -0.941998 |
| 23            | 1             | 0           | 2.041224                | 0.257993  | -1.995652 |
| 24            | 6             | 0           | 1.860012                | 2.915794  | -0.113110 |
| 25            | 1             | 0           | 1.630332                | 2.556007  | 0.895829  |
| 26            | 1             | 0           | 2.610613                | 3.706750  | -0.040439 |
| 27            | 1             | 0           | 0.950241                | 3.345581  | -0.552782 |
| 28            | 16            | 0           | 2.027567                | -2.093682 | -0.233143 |
| 29            | 6             | 0           | 2.637066                | -0.355489 | -0.032070 |
| 30            | 1             | 0           | 3.660713                | -0.356931 | -0.421828 |
| 31            | 6             | 0           | 2.690251                | 0.116946  | 1.401166  |
| 32            | 1             | 0           | 3.308928                | 1.004046  | 1.533398  |
| 33            | 6             | 0           | 2.095433                | -0.416176 | 2.468850  |
| 34            | 1             | 0           | 2.212045                | 0.031516  | 3.451288  |
| 35            | 1             | 0           | 1.489872                | -1.313753 | 2.398058  |

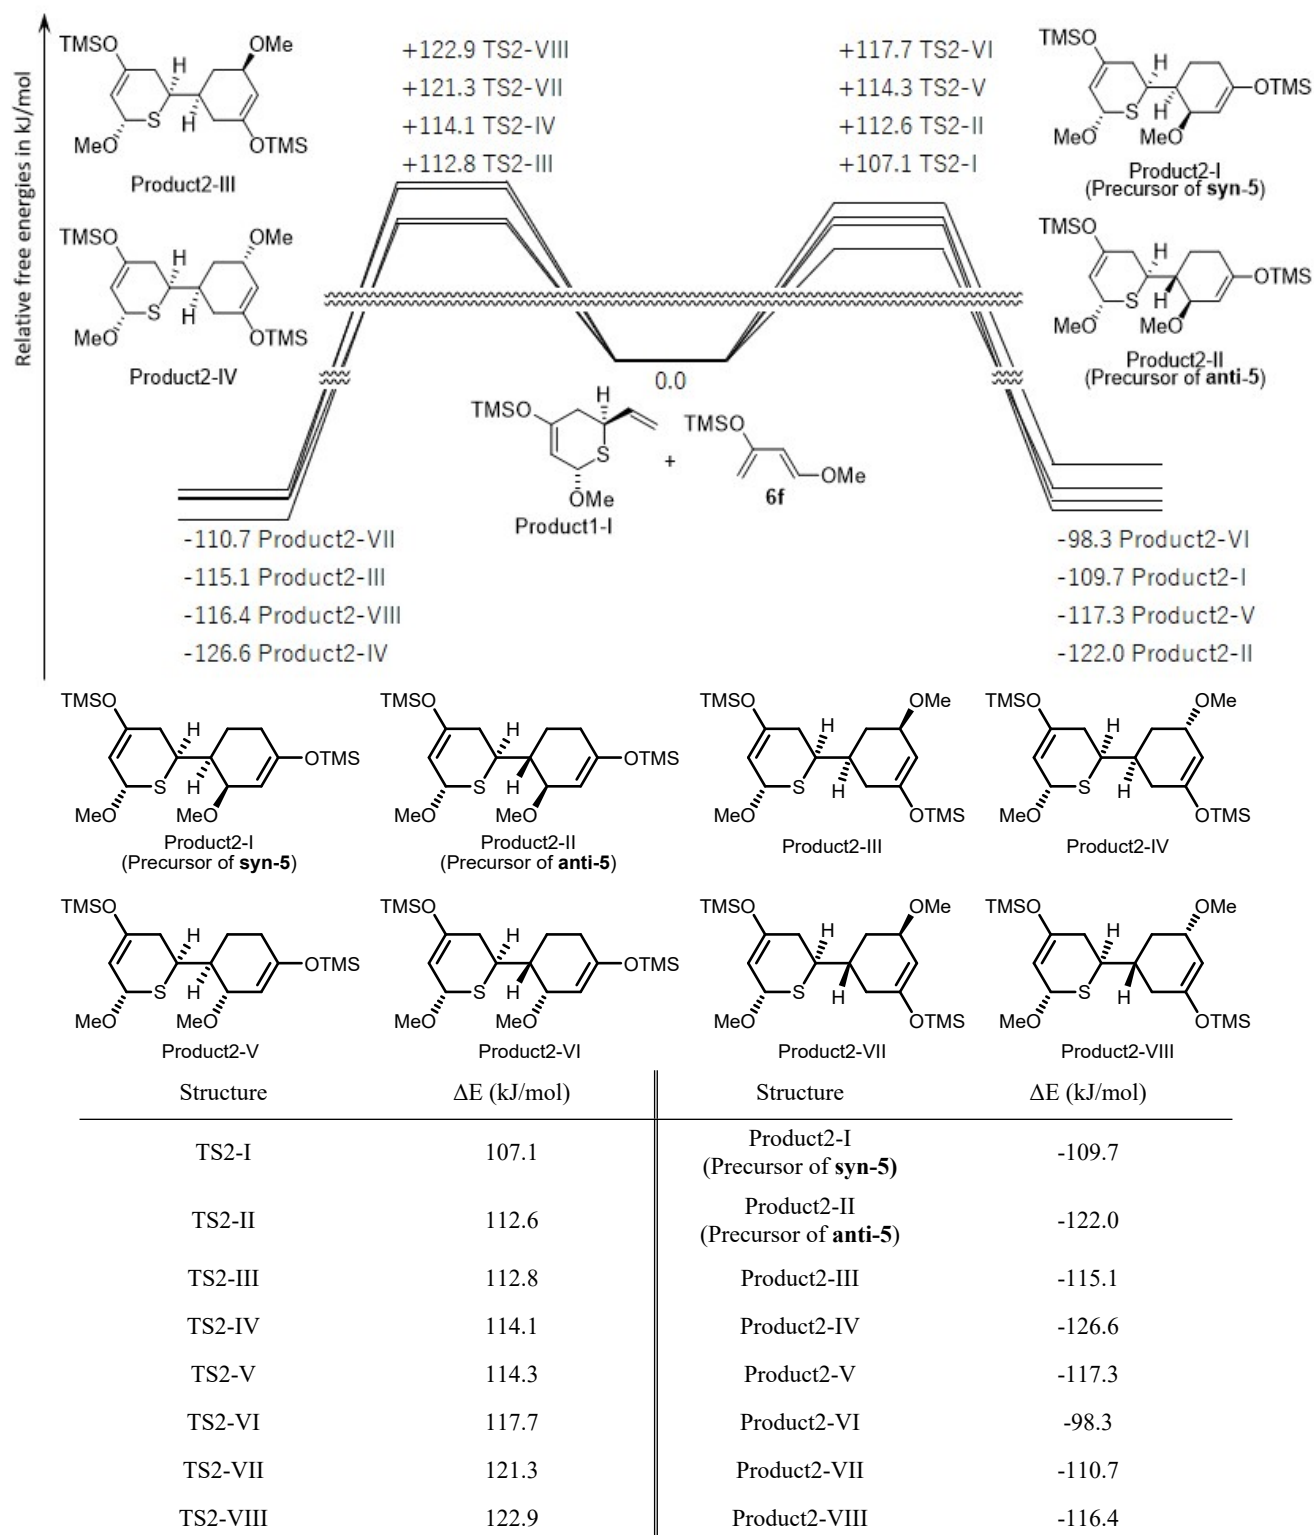

**Figure S9.** DFT computed Gibbs free energies and producted structures for Diels–Alder reactions of product1-I and Danishefsky’s diene (**6f**).

TS2-I

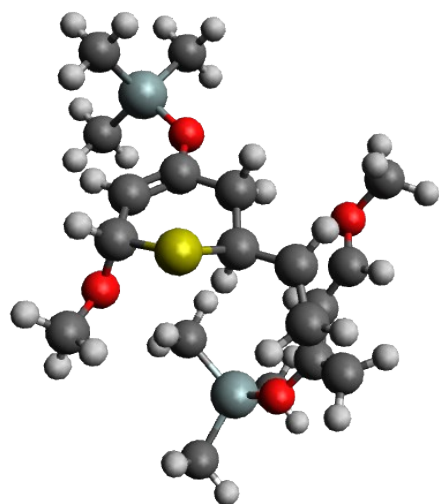

HF = -2023.8416529 hartrees  
 Imaginary Frequencies: 1 (-492.4656 1/cm)  
 Zero-point correction = 0.516172 (Hartree/Particle)  
 Temperature: 298.150 Kelvin. Pressure: 1.00000 Atm.  
 Sum of electronic and zero-point Energies = -2023.325481 hartrees

Coordinates:

| Center Number | Atomic Number | Atomic Type | Coordinates (Angstroms) |           |           |
|---------------|---------------|-------------|-------------------------|-----------|-----------|
|               |               |             | X                       | Y         | Z         |
| 1             | 6             | 0           | 1.333673                | 2.095823  | 1.592862  |
| 2             | 6             | 0           | 2.205306                | 1.340571  | 0.632570  |
| 3             | 1             | 0           | 2.911155                | 1.963619  | 0.091216  |
| 4             | 6             | 0           | 2.169416                | 0.018536  | 0.395657  |
| 5             | 6             | 0           | 1.199088                | -0.963548 | 1.002558  |
| 6             | 1             | 0           | 0.912519                | -1.663117 | 0.210376  |
| 7             | 1             | 0           | 1.723805                | -1.555683 | 1.766089  |
| 8             | 16            | 0           | 0.462164                | 1.003526  | 2.808063  |
| 9             | 6             | 0           | -0.061300               | -0.346280 | 1.600972  |
| 10            | 8             | 0           | 3.024772                | -0.621322 | -0.455117 |
| 11            | 14            | 0           | 4.477221                | -0.138509 | -1.203063 |
| 12            | 6             | 0           | 5.692153                | 0.488876  | 0.090608  |
| 13            | 1             | 0           | 5.326252                | 1.379348  | 0.609584  |
| 14            | 1             | 0           | 5.892431                | -0.280872 | 0.843338  |
| 15            | 1             | 0           | 6.645423                | 0.746172  | -0.384924 |
| 16            | 6             | 0           | 5.095701                | -1.727133 | -1.989605 |
| 17            | 1             | 0           | 4.371344                | -2.119820 | -2.710625 |
| 18            | 1             | 0           | 6.037354                | -1.553407 | -2.521993 |
| 19            | 1             | 0           | 5.274704                | -2.499855 | -1.234977 |
| 20            | 6             | 0           | 4.137218                | 1.156864  | -2.527272 |
| 21            | 1             | 0           | 3.388866                | 0.796089  | -3.240860 |
| 22            | 1             | 0           | 3.776842                | 2.103495  | -2.113910 |
| 23            | 1             | 0           | 5.055970                | 1.367119  | -3.086965 |
| 24            | 8             | 0           | 0.449044                | 2.912333  | 0.832223  |
| 25            | 1             | 0           | 1.958922                | 2.743568  | 2.225799  |
| 26            | 6             | 0           | -0.115161               | 3.992495  | 1.564438  |
| 27            | 1             | 0           | 0.666667                | 4.652214  | 1.968582  |
| 28            | 1             | 0           | -0.735479               | 4.559414  | 0.867334  |
| 29            | 1             | 0           | -0.738327               | 3.636157  | 2.394256  |
| 30            | 6             | 0           | -0.969917               | -1.320267 | 2.285433  |

|    |    |   |           |           |           |
|----|----|---|-----------|-----------|-----------|
| 31 | 1  | 0 | -0.513176 | -2.208031 | 2.714645  |
| 32 | 6  | 0 | -2.244175 | -0.923083 | 2.713813  |
| 33 | 1  | 0 | -2.450970 | 0.144255  | 2.729779  |
| 34 | 1  | 0 | -2.684246 | -1.459159 | 3.551011  |
| 35 | 1  | 0 | -0.609984 | 0.194765  | 0.822617  |
| 36 | 6  | 0 | -1.649139 | -2.771511 | 0.203344  |
| 37 | 6  | 0 | -2.303833 | -1.752851 | -0.456685 |
| 38 | 6  | 0 | -3.341133 | -1.020886 | 0.152259  |
| 39 | 6  | 0 | -3.775442 | -1.329027 | 1.450034  |
| 40 | 1  | 0 | -3.844429 | -2.378587 | 1.712091  |
| 41 | 1  | 0 | -2.064102 | -3.284606 | 1.061208  |
| 42 | 8  | 0 | -0.615656 | -3.396404 | -0.416971 |
| 43 | 8  | 0 | -3.810875 | 0.141634  | -0.391771 |
| 44 | 14 | 0 | -3.471236 | 0.998989  | -1.820249 |
| 45 | 6  | 0 | -4.002363 | -0.029109 | -3.306939 |
| 46 | 1  | 0 | -3.842065 | 0.533752  | -4.233630 |
| 47 | 1  | 0 | -3.439939 | -0.964815 | -3.386183 |
| 48 | 1  | 0 | -5.066540 | -0.281094 | -3.249329 |
| 49 | 6  | 0 | -4.542066 | 2.532407  | -1.653172 |
| 50 | 1  | 0 | -5.598886 | 2.268000  | -1.544679 |
| 51 | 1  | 0 | -4.250597 | 3.125708  | -0.780388 |
| 52 | 1  | 0 | -4.444618 | 3.169530  | -2.539136 |
| 53 | 6  | 0 | -1.652421 | 1.471999  | -1.943921 |
| 54 | 1  | 0 | -1.278504 | 1.943359  | -1.028621 |
| 55 | 1  | 0 | -1.005839 | 0.617529  | -2.165500 |
| 56 | 1  | 0 | -1.528619 | 2.193099  | -2.761159 |
| 57 | 6  | 0 | -0.080157 | -4.526570 | 0.276581  |
| 58 | 1  | 0 | 0.718676  | -4.925250 | -0.348736 |
| 59 | 1  | 0 | 0.329063  | -4.228756 | 1.248175  |
| 60 | 1  | 0 | -0.847763 | -5.294634 | 0.423559  |
| 61 | 1  | 0 | -4.581068 | -0.720907 | 1.851083  |
| 62 | 1  | 0 | -1.894210 | -1.435493 | -1.409897 |

---



## Product2-I

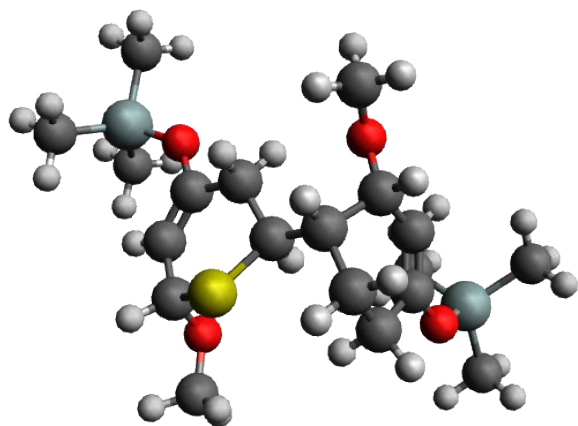

HF = -2023.9301441 hartrees

Imaginary Frequencies: none found

Zero-point correction = 0.522076 (Hartree/Particle)

Temperature: 298.150 Kelvin. Pressure: 1.00000 Atm.

Sum of electronic and zero-point Energies = -2023.408068 hartrees

Coordinates:

| Center Number | Atomic Number | Atomic Type | Coordinates (Angstroms) |           |           |
|---------------|---------------|-------------|-------------------------|-----------|-----------|
|               |               |             | X                       | Y         | Z         |
| 1             | 6             | 0           | -1.752833               | -2.475977 | 0.138299  |
| 2             | 6             | 0           | -2.584780               | -1.316299 | -0.321460 |
| 3             | 1             | 0           | -3.320607               | -1.568261 | -1.079160 |
| 4             | 6             | 0           | -2.468215               | -0.048509 | 0.104752  |
| 5             | 6             | 0           | -1.438142               | 0.462780  | 1.079397  |
| 6             | 1             | 0           | -1.092206               | 1.430797  | 0.708319  |
| 7             | 1             | 0           | -1.929749               | 0.655092  | 2.043658  |
| 8             | 16            | 0           | -0.840169               | -2.147157 | 1.718020  |
| 9             | 6             | 0           | -0.224694               | -0.447654 | 1.279410  |
| 10            | 8             | 0           | -3.279311               | 0.968466  | -0.308093 |
| 11            | 14            | 0           | -4.787469               | 0.980474  | -1.101420 |
| 12            | 6             | 0           | -6.009819               | -0.103319 | -0.166617 |
| 13            | 1             | 0           | -5.693577               | -1.149780 | -0.131327 |
| 14            | 1             | 0           | -6.133161               | 0.246220  | 0.863809  |
| 15            | 1             | 0           | -6.991914               | -0.066221 | -0.651486 |
| 16            | 6             | 0           | -5.290257               | 2.787571  | -1.024909 |
| 17            | 1             | 0           | -4.555310               | 3.424190  | -1.528231 |
| 18            | 1             | 0           | -6.257691               | 2.940722  | -1.515782 |
| 19            | 1             | 0           | -5.381383               | 3.130173  | 0.010862  |
| 20            | 6             | 0           | -4.598336               | 0.430580  | -2.892790 |
| 21            | 1             | 0           | -3.827599               | 1.018944  | -3.401827 |
| 22            | 1             | 0           | -4.331288               | -0.626103 | -2.988154 |
| 23            | 1             | 0           | -5.541797               | 0.583654  | -3.429600 |
| 24            | 8             | 0           | -0.899926               | -2.856269 | -0.929694 |
| 25            | 1             | 0           | -2.406185               | -3.321196 | 0.401581  |
| 26            | 6             | 0           | -0.402941               | -4.185238 | -0.833196 |
| 27            | 1             | 0           | -1.222978               | -4.917407 | -0.803256 |
| 28            | 1             | 0           | 0.202092                | -4.362959 | -1.724568 |
| 29            | 1             | 0           | 0.221680                | -4.319661 | 0.058779  |
| 30            | 6             | 0           | 0.773369                | 0.052718  | 2.353610  |
| 31            | 1             | 0           | 0.207606                | 0.247359  | 3.273868  |
| 32            | 6             | 0           | 1.883425                | -0.973703 | 2.680891  |
| 33            | 1             | 0           | 1.456988                | -1.888553 | 3.099669  |

|    |    |   |           |           |           |
|----|----|---|-----------|-----------|-----------|
| 34 | 1  | 0 | 2.521733  | -0.543279 | 3.462030  |
| 35 | 1  | 0 | 0.293488  | -0.562378 | 0.322778  |
| 36 | 6  | 0 | 1.539198  | 1.352563  | 1.964249  |
| 37 | 6  | 0 | 2.538143  | 1.104196  | 0.860131  |
| 38 | 6  | 0 | 3.090472  | -0.098576 | 0.636917  |
| 39 | 6  | 0 | 2.742774  | -1.315818 | 1.454606  |
| 40 | 1  | 0 | 3.673330  | -1.806096 | 1.765343  |
| 41 | 1  | 0 | 2.074117  | 1.669124  | 2.878100  |
| 42 | 8  | 0 | 0.729214  | 2.459105  | 1.554128  |
| 43 | 8  | 0 | 4.014846  | -0.377516 | -0.329028 |
| 44 | 14 | 0 | 4.524082  | 0.509888  | -1.689869 |
| 45 | 6  | 0 | 5.499320  | 2.030974  | -1.156577 |
| 46 | 1  | 0 | 5.923298  | 2.529240  | -2.036067 |
| 47 | 1  | 0 | 4.884371  | 2.763407  | -0.625309 |
| 48 | 1  | 0 | 6.330664  | 1.751137  | -0.500741 |
| 49 | 6  | 0 | 5.643560  | -0.697520 | -2.592406 |
| 50 | 1  | 0 | 6.486105  | -1.002895 | -1.963318 |
| 51 | 1  | 0 | 5.097480  | -1.599403 | -2.887336 |
| 52 | 1  | 0 | 6.052441  | -0.240764 | -3.500462 |
| 53 | 6  | 0 | 3.036693  | 0.973573  | -2.745375 |
| 54 | 1  | 0 | 2.499019  | 0.078553  | -3.075655 |
| 55 | 1  | 0 | 2.329042  | 1.609970  | -2.206288 |
| 56 | 1  | 0 | 3.362706  | 1.516558  | -3.639721 |
| 57 | 6  | 0 | 0.139625  | 3.174082  | 2.629223  |
| 58 | 1  | 0 | -0.365049 | 4.040989  | 2.196680  |
| 59 | 1  | 0 | -0.601144 | 2.576848  | 3.177415  |
| 60 | 1  | 0 | 0.901400  | 3.522541  | 3.341695  |
| 61 | 1  | 0 | 2.226270  | -2.036499 | 0.806116  |
| 62 | 1  | 0 | 2.819982  | 1.976540  | 0.279872  |

---

TS2-II

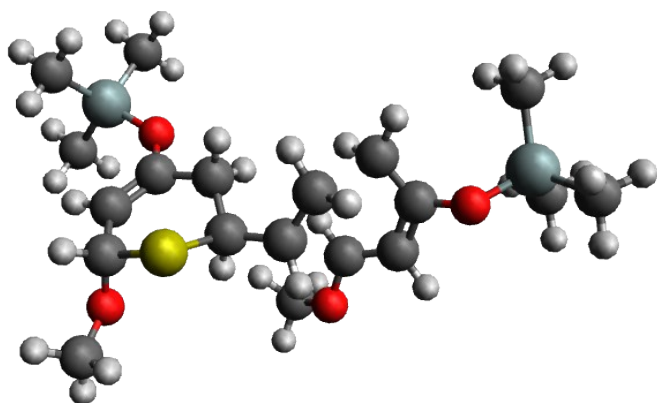

HF = -2023.8380702 hartrees  
 Imaginary Frequencies: 1 (-490.0376 1/cm)  
 Zero-point correction = 0.515326 (Hartree/Particle)  
 Temperature: 298.150 Kelvin. Pressure: 1.00000 Atm.  
 Sum of electronic and zero-point Energies = -2023.322744 hartrees

Coordinates:

| Center Number | Atomic Number | Atomic Type | Coordinates (Angstroms) |           |           |
|---------------|---------------|-------------|-------------------------|-----------|-----------|
|               |               |             | X                       | Y         | Z         |
| 1             | 6             | 0           | -2.674588               | 2.565411  | 0.026107  |
| 2             | 6             | 0           | -3.465196               | 1.291434  | 0.106062  |
| 3             | 1             | 0           | -4.459285               | 1.413065  | 0.526200  |
| 4             | 6             | 0           | -3.046750               | 0.069636  | -0.263838 |
| 5             | 6             | 0           | -1.675747               | -0.265180 | -0.793132 |
| 6             | 1             | 0           | -1.394465               | -1.244634 | -0.393951 |
| 7             | 1             | 0           | -1.735369               | -0.391985 | -1.883148 |
| 8             | 16            | 0           | -1.176196               | 2.436334  | -1.059139 |
| 9             | 6             | 0           | -0.585701               | 0.751024  | -0.461173 |
| 10            | 8             | 0           | -3.826920               | -1.049114 | -0.203847 |
| 11            | 14            | 0           | -5.515089               | -1.260752 | -0.097716 |
| 12            | 6             | 0           | -6.371067               | -0.247236 | -1.432203 |
| 13            | 1             | 0           | -6.194011               | 0.825816  | -1.316333 |
| 14            | 1             | 0           | -6.023060               | -0.540435 | -2.428204 |
| 15            | 1             | 0           | -7.453381               | -0.414679 | -1.393880 |
| 16            | 6             | 0           | -5.731162               | -3.100635 | -0.402037 |
| 17            | 1             | 0           | -5.194942               | -3.692216 | 0.347174  |
| 18            | 1             | 0           | -6.789786               | -3.378498 | -0.352237 |
| 19            | 1             | 0           | -5.355378               | -3.385505 | -1.390022 |
| 20            | 6             | 0           | -6.130666               | -0.808960 | 1.624182  |
| 21            | 1             | 0           | -5.573238               | -1.354371 | 2.393135  |
| 22            | 1             | 0           | -6.043748               | 0.259808  | 1.841597  |
| 23            | 1             | 0           | -7.187506               | -1.082406 | 1.723881  |
| 24            | 8             | 0           | -2.371051               | 2.969634  | 1.355036  |
| 25            | 1             | 0           | -3.279857               | 3.346078  | -0.459018 |
| 26            | 6             | 0           | -2.033793               | 4.344661  | 1.479378  |
| 27            | 1             | 0           | -2.851637               | 4.991019  | 1.128302  |
| 28            | 1             | 0           | -1.859728               | 4.534749  | 2.540597  |
| 29            | 1             | 0           | -1.125077               | 4.590487  | 0.915378  |
| 30            | 6             | 0           | 0.737995                | 0.401956  | -1.070725 |
| 31            | 1             | 0           | 0.714241                | -0.320577 | -1.880195 |
| 32            | 6             | 0           | 1.889001                | 1.188452  | -0.894858 |
| 33            | 1             | 0           | 1.740946                | 2.184644  | -0.479892 |

|    |    |   |           |           |           |
|----|----|---|-----------|-----------|-----------|
| 34 | 1  | 0 | 2.626814  | 1.172212  | -1.693187 |
| 35 | 1  | 0 | -0.517645 | 0.877485  | 0.627078  |
| 36 | 6  | 0 | 1.378047  | -1.730220 | 0.448788  |
| 37 | 6  | 0 | 2.705251  | -1.773091 | 0.088075  |
| 38 | 6  | 0 | 3.562982  | -0.661151 | 0.162952  |
| 39 | 6  | 0 | 3.085227  | 0.608278  | 0.539586  |
| 40 | 1  | 0 | 2.357377  | 0.641305  | 1.344258  |
| 41 | 1  | 0 | 0.964893  | -0.983127 | 1.118980  |
| 42 | 8  | 0 | 0.588676  | -2.814225 | 0.211414  |
| 43 | 8  | 0 | 4.786538  | -0.819810 | -0.432864 |
| 44 | 14 | 0 | 6.302728  | -0.169380 | -0.016547 |
| 45 | 6  | 0 | -0.306847 | -3.159465 | 1.274956  |
| 46 | 1  | 0 | -0.974952 | -3.928108 | 0.885091  |
| 47 | 1  | 0 | 0.248012  | -3.554671 | 2.133349  |
| 48 | 1  | 0 | -0.898138 | -2.294131 | 1.596653  |
| 49 | 6  | 0 | 6.506735  | -0.192701 | 1.854357  |
| 50 | 1  | 0 | 7.493702  | 0.194334  | 2.131631  |
| 51 | 1  | 0 | 5.754078  | 0.423143  | 2.356282  |
| 52 | 1  | 0 | 6.424330  | -1.211744 | 2.246604  |
| 53 | 6  | 0 | 6.489010  | 1.575379  | -0.701851 |
| 54 | 1  | 0 | 6.259494  | 1.603740  | -1.772346 |
| 55 | 1  | 0 | 5.839572  | 2.298641  | -0.198718 |
| 56 | 1  | 0 | 7.522937  | 1.917159  | -0.574979 |
| 57 | 6  | 0 | 7.521239  | -1.324659 | -0.856695 |
| 58 | 1  | 0 | 7.426984  | -2.346294 | -0.474748 |
| 59 | 1  | 0 | 7.357480  | -1.352485 | -1.939021 |
| 60 | 1  | 0 | 8.551156  | -0.993787 | -0.683202 |
| 61 | 1  | 0 | 3.075164  | -2.673726 | -0.393737 |
| 62 | 1  | 0 | 3.804440  | 1.420750  | 0.591021  |

---

## Product2-II

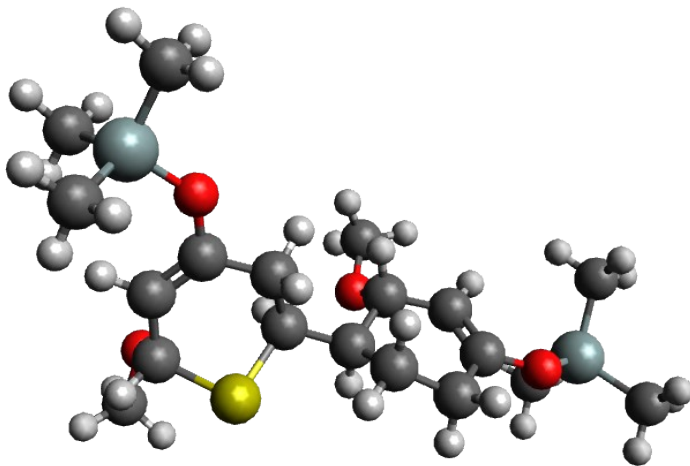

HF = -2023.9332031 hartrees

Imaginary Frequencies: none found

Zero-point correction = 0.522240 (Hartree/Particle)

Temperature: 298.150 Kelvin. Pressure: 1.00000 Atm.

Sum of electronic and zero-point Energies = -2023.410963 hartrees

Coordinates:

| Center<br>Number | Atomic<br>Number | Atomic<br>Type | Coordinates (Angstroms) |           |           |
|------------------|------------------|----------------|-------------------------|-----------|-----------|
|                  |                  |                | X                       | Y         | Z         |
| 1                | 6                | 0              | -2.216245               | 2.285017  | 0.754930  |
| 2                | 6                | 0              | -2.913374               | 0.960574  | 0.656231  |
| 3                | 1                | 0              | -3.734938               | 0.834935  | 1.354828  |
| 4                | 6                | 0              | -2.588570               | -0.038543 | -0.179320 |
| 5                | 6                | 0              | -1.424868               | -0.040041 | -1.140071 |
| 6                | 1                | 0              | -0.986918               | -1.042647 | -1.078168 |
| 7                | 1                | 0              | -1.807755               | 0.067413  | -2.164687 |
| 8                | 16               | 0              | -1.168272               | 2.671808  | -0.724623 |
| 9                | 6                | 0              | -0.349786               | 1.014165  | -0.863095 |
| 10               | 8                | 0              | -3.274115               | -1.214366 | -0.263493 |
| 11               | 14               | 0              | -4.816064               | -1.683981 | 0.294387  |
| 12               | 6                | 0              | -6.113057               | -0.462429 | -0.311039 |
| 13               | 1                | 0              | -5.951345               | 0.545380  | 0.081944  |
| 14               | 1                | 0              | -6.111985               | -0.401930 | -1.404409 |
| 15               | 1                | 0              | -7.110626               | -0.788650 | 0.004140  |
| 16               | 6                | 0              | -5.054582               | -3.370245 | -0.494872 |
| 17               | 1                | 0              | -4.272815               | -4.069169 | -0.180067 |
| 18               | 1                | 0              | -6.021292               | -3.797637 | -0.206525 |
| 19               | 1                | 0              | -5.029371               | -3.304025 | -1.587329 |
| 20               | 6                | 0              | -4.819373               | -1.833710 | 2.171561  |
| 21               | 1                | 0              | -4.010867               | -2.489428 | 2.511711  |
| 22               | 1                | 0              | -4.704693               | -0.869952 | 2.676548  |
| 23               | 1                | 0              | -5.766243               | -2.272846 | 2.506529  |
| 24               | 8                | 0              | -1.491040               | 2.310034  | 1.973490  |
| 25               | 1                | 0              | -2.958539               | 3.096921  | 0.753845  |
| 26               | 6                | 0              | -1.157971               | 3.616718  | 2.426223  |
| 27               | 1                | 0              | -2.058866               | 4.228687  | 2.577969  |
| 28               | 1                | 0              | -0.640934               | 3.498999  | 3.380629  |
| 29               | 1                | 0              | -0.496631               | 4.132284  | 1.718740  |
| 30               | 6                | 0              | 0.759235                | 1.071753  | -1.939956 |
| 31               | 1                | 0              | 0.280660                | 1.289537  | -2.902850 |

|    |    |   |          |           |           |
|----|----|---|----------|-----------|-----------|
| 32 | 6  | 0 | 1.834384 | 2.144057  | -1.670461 |
| 33 | 1  | 0 | 1.394155 | 3.143832  | -1.631188 |
| 34 | 1  | 0 | 2.524536 | 2.126797  | -2.519180 |
| 35 | 1  | 0 | 0.090533 | 0.818693  | 0.119230  |
| 36 | 6  | 0 | 1.488977 | -0.278997 | -2.113408 |
| 37 | 6  | 0 | 2.448309 | -0.563487 | -0.981228 |
| 38 | 6  | 0 | 2.959665 | 0.410185  | -0.206500 |
| 39 | 6  | 0 | 2.612836 | 1.866088  | -0.378249 |
| 40 | 1  | 0 | 2.041473 | 2.185876  | 0.504396  |
| 41 | 1  | 0 | 0.765276 | -1.104341 | -2.174919 |
| 42 | 8  | 0 | 2.135077 | -0.194023 | -3.402489 |
| 43 | 8  | 0 | 3.815683 | 0.217107  | 0.836425  |
| 44 | 14 | 0 | 4.400512 | -1.195577 | 1.588374  |
| 45 | 6  | 0 | 2.744735 | -1.400267 | -3.821543 |
| 46 | 1  | 0 | 3.105444 | -1.240272 | -4.840786 |
| 47 | 1  | 0 | 3.597442 | -1.679991 | -3.187539 |
| 48 | 1  | 0 | 2.029446 | -2.237792 | -3.828118 |
| 49 | 6  | 0 | 5.472808 | -2.178166 | 0.392028  |
| 50 | 1  | 0 | 5.926941 | -3.029936 | 0.911334  |
| 51 | 1  | 0 | 4.907402 | -2.570756 | -0.458285 |
| 52 | 1  | 0 | 6.284896 | -1.558086 | -0.002155 |
| 53 | 6  | 0 | 2.963020 | -2.221701 | 2.239831  |
| 54 | 1  | 0 | 2.352328 | -1.638162 | 2.936818  |
| 55 | 1  | 0 | 2.308885 | -2.580763 | 1.440108  |
| 56 | 1  | 0 | 3.341706 | -3.096579 | 2.780494  |
| 57 | 6  | 0 | 5.438023 | -0.525422 | 3.001911  |
| 58 | 1  | 0 | 6.251343 | 0.106908  | 2.631254  |
| 59 | 1  | 0 | 4.831488 | 0.072502  | 3.689788  |
| 60 | 1  | 0 | 5.885463 | -1.345035 | 3.574944  |
| 61 | 1  | 0 | 2.723623 | -1.598602 | -0.807034 |
| 62 | 1  | 0 | 3.541030 | 2.449396  | -0.356003 |

---

TS2-III

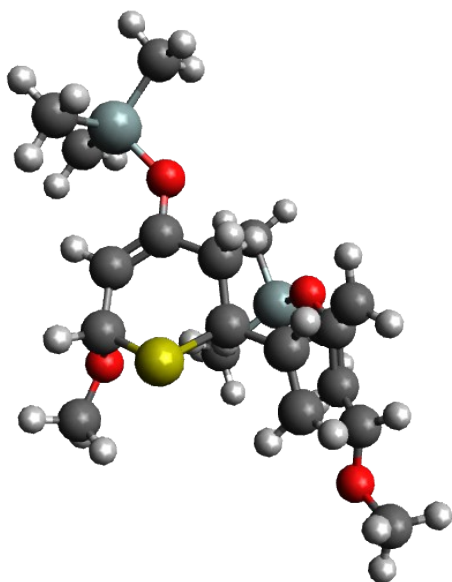

HF = -2023.8393261 hartrees  
 Imaginary Frequencies: 1 (-535.1374 1/cm)  
 Zero-point correction = 0.516040 (Hartree/Particle)  
 Temperature: 298.150 Kelvin. Pressure: 1.00000 Atm.  
 Sum of electronic and zero-point Energies = -2023.323286 hartrees

Coordinates:

| Center Number | Atomic Number | Atomic Type | Coordinates (Angstroms) |           |           |
|---------------|---------------|-------------|-------------------------|-----------|-----------|
|               |               |             | X                       | Y         | Z         |
| 1             | 6             | 0           | 1.204836                | -2.370505 | 1.305146  |
| 2             | 6             | 0           | 2.181870                | -1.394137 | 0.722117  |
| 3             | 1             | 0           | 3.076519                | -1.243648 | 1.318679  |
| 4             | 6             | 0           | 2.014336                | -0.700276 | -0.415186 |
| 5             | 6             | 0           | 0.796605                | -0.735937 | -1.304067 |
| 6             | 1             | 0           | 0.592326                | 0.300890  | -1.586311 |
| 7             | 1             | 0           | 1.051606                | -1.270094 | -2.230305 |
| 8             | 16            | 0           | -0.036987               | -2.987939 | 0.075265  |
| 9             | 6             | 0           | -0.462013               | -1.337327 | -0.681654 |
| 10            | 8             | 0           | 2.944825                | 0.159394  | -0.922590 |
| 11            | 14            | 0           | 4.607482                | 0.363987  | -0.607491 |
| 12            | 6             | 0           | 5.495200                | -1.287881 | -0.765994 |
| 13            | 1             | 0           | 5.361635                | -1.708433 | -1.768209 |
| 14            | 1             | 0           | 6.570164                | -1.153388 | -0.600862 |
| 15            | 1             | 0           | 5.134902                | -2.023890 | -0.041607 |
| 16            | 6             | 0           | 5.150037                | 1.555419  | -1.952779 |
| 17            | 1             | 0           | 4.600756                | 2.500399  | -1.889945 |
| 18            | 1             | 0           | 6.217867                | 1.782156  | -1.859823 |
| 19            | 1             | 0           | 4.982080                | 1.132287  | -2.948384 |
| 20            | 6             | 0           | 4.866732                | 1.134461  | 1.091556  |
| 21            | 1             | 0           | 4.276710                | 2.051130  | 1.197291  |
| 22            | 1             | 0           | 4.592272                | 0.462863  | 1.910497  |
| 23            | 1             | 0           | 5.921877                | 1.401658  | 1.221603  |
| 24            | 8             | 0           | 0.610208                | -1.760856 | 2.443398  |
| 25            | 1             | 0           | 1.731402                | -3.284511 | 1.617920  |
| 26            | 6             | 0           | -0.001215               | -2.675418 | 3.344741  |
| 27            | 1             | 0           | 0.723676                | -3.414461 | 3.715891  |

|    |    |   |           |           |           |
|----|----|---|-----------|-----------|-----------|
| 28 | 1  | 0 | -0.375867 | -2.088450 | 4.185598  |
| 29 | 1  | 0 | -0.837631 | -3.207546 | 2.874760  |
| 30 | 6  | 0 | -1.616317 | -1.524293 | -1.644144 |
| 31 | 1  | 0 | -1.336102 | -1.790394 | -2.660715 |
| 32 | 6  | 0 | -2.851319 | -1.962414 | -1.161606 |
| 33 | 1  | 0 | -2.968103 | -2.193539 | -0.109076 |
| 34 | 1  | 0 | -3.518196 | -2.493923 | -1.833423 |
| 35 | 1  | 0 | -0.792025 | -0.718968 | 0.159477  |
| 36 | 6  | 0 | -1.948654 | 0.570925  | -2.344589 |
| 37 | 6  | 0 | -2.273926 | 1.191803  | -1.140248 |
| 38 | 6  | 0 | -3.400817 | 0.800928  | -0.402034 |
| 39 | 6  | 0 | -4.254102 | -0.203294 | -0.853167 |
| 40 | 1  | 0 | -4.471672 | -0.326919 | -1.909393 |
| 41 | 1  | 0 | -2.741124 | 0.201717  | -2.981614 |
| 42 | 8  | 0 | -5.237295 | -0.617588 | -0.002470 |
| 43 | 8  | 0 | -1.327172 | 2.036959  | -0.615284 |
| 44 | 14 | 0 | -1.175511 | 2.861234  | 0.860290  |
| 45 | 6  | 0 | -6.252380 | -1.430374 | -0.589793 |
| 46 | 1  | 0 | -6.970054 | -1.653183 | 0.200628  |
| 47 | 1  | 0 | -6.762903 | -0.900627 | -1.403211 |
| 48 | 1  | 0 | -5.836081 | -2.368011 | -0.974730 |
| 49 | 6  | 0 | -2.566109 | 4.121716  | 1.029160  |
| 50 | 1  | 0 | -3.552420 | 3.648037  | 1.057908  |
| 51 | 1  | 0 | -2.446932 | 4.697891  | 1.953860  |
| 52 | 1  | 0 | -2.557546 | 4.828111  | 0.192308  |
| 53 | 6  | 0 | -1.158761 | 1.679975  | 2.329344  |
| 54 | 1  | 0 | -2.136851 | 1.228249  | 2.521406  |
| 55 | 1  | 0 | -0.435876 | 0.867882  | 2.196798  |
| 56 | 1  | 0 | -0.872839 | 2.234572  | 3.231396  |
| 57 | 6  | 0 | 0.487611  | 3.717482  | 0.690466  |
| 58 | 1  | 0 | 1.291240  | 2.986806  | 0.550985  |
| 59 | 1  | 0 | 0.497455  | 4.398098  | -0.167041 |
| 60 | 1  | 0 | 0.716954  | 4.303147  | 1.587502  |
| 61 | 1  | 0 | -3.519906 | 1.122326  | 0.627415  |
| 62 | 1  | 0 | -1.057317 | 0.897307  | -2.868741 |

---



## Product2-III

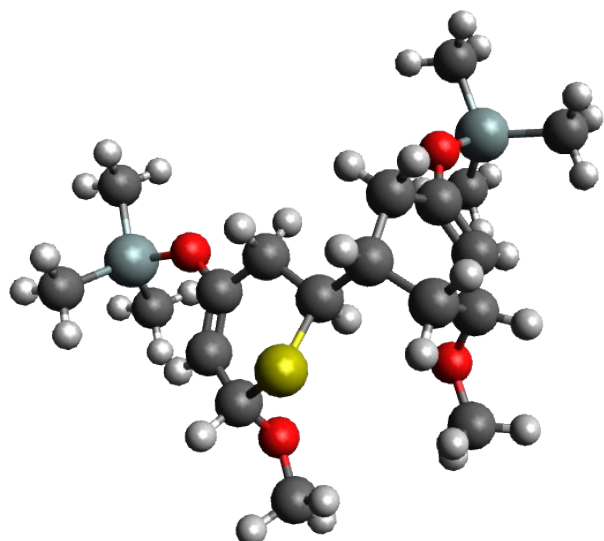

HF = -2023.9324886 hartrees

Imaginary Frequencies: none found

Zero-point correction = 0.522418 (Hartree/Particle)

Temperature: 298.150 Kelvin. Pressure: 1.00000 Atm.

Sum of electronic and zero-point Energies = -2023.410070 hartrees

Coordinates:

| Center Number | Atomic Number | Atomic Type | Coordinates (Angstroms) |           |           |
|---------------|---------------|-------------|-------------------------|-----------|-----------|
|               |               |             | X                       | Y         | Z         |
| 1             | 6             | 0           | 2.707682                | -2.100539 | 0.109323  |
| 2             | 6             | 0           | 3.030992                | -0.638373 | 0.189138  |
| 3             | 1             | 0           | 3.920973                | -0.413752 | 0.769194  |
| 4             | 6             | 0           | 2.326338                | 0.361338  | -0.364050 |
| 5             | 6             | 0           | 1.032010                | 0.214709  | -1.126033 |
| 6             | 1             | 0           | 0.398742                | 1.049858  | -0.805354 |
| 7             | 1             | 0           | 1.230442                | 0.368658  | -2.196528 |
| 8             | 16            | 0           | 1.467825                | -2.505695 | -1.206122 |
| 9             | 6             | 0           | 0.291857                | -1.104011 | -0.901591 |
| 10            | 8             | 0           | 2.692671                | 1.674022  | -0.300739 |
| 11            | 14            | 0           | 4.140997                | 2.440375  | 0.169840  |
| 12            | 6             | 0           | 5.588093                | 1.733186  | -0.804187 |
| 13            | 1             | 0           | 5.428893                | 1.853289  | -1.880959 |
| 14            | 1             | 0           | 6.510284                | 2.264152  | -0.542204 |
| 15            | 1             | 0           | 5.746654                | 0.669681  | -0.604278 |
| 16            | 6             | 0           | 3.837200                | 4.235441  | -0.287259 |
| 17            | 1             | 0           | 2.967688                | 4.637463  | 0.242841  |
| 18            | 1             | 0           | 4.703889                | 4.852111  | -0.024721 |
| 19            | 1             | 0           | 3.659554                | 4.346471  | -1.361801 |
| 20            | 6             | 0           | 4.398523                | 2.270829  | 2.027461  |
| 21            | 1             | 0           | 3.525312                | 2.639594  | 2.575976  |
| 22            | 1             | 0           | 4.578193                | 1.237842  | 2.339684  |
| 23            | 1             | 0           | 5.263537                | 2.867447  | 2.339470  |
| 24            | 8             | 0           | 2.326441                | -2.536377 | 1.403663  |
| 25            | 1             | 0           | 3.599721                | -2.659033 | -0.212801 |
| 26            | 6             | 0           | 2.442579                | -3.939056 | 1.600653  |
| 27            | 1             | 0           | 3.472497                | -4.283972 | 1.427111  |
| 28            | 1             | 0           | 2.170172                | -4.137262 | 2.639346  |

|    |    |   |           |           |           |
|----|----|---|-----------|-----------|-----------|
| 29 | 1  | 0 | 1.768055  | -4.497187 | 0.939039  |
| 30 | 6  | 0 | -0.943442 | -1.306359 | -1.819566 |
| 31 | 1  | 0 | -0.563101 | -1.503043 | -2.830810 |
| 32 | 6  | 0 | -1.816367 | -2.503619 | -1.390787 |
| 33 | 1  | 0 | -1.225412 | -3.422333 | -1.343191 |
| 34 | 1  | 0 | -2.577595 | -2.662779 | -2.164865 |
| 35 | 1  | 0 | -0.008765 | -1.184953 | 0.145390  |
| 36 | 6  | 0 | -1.861922 | -0.071037 | -1.920400 |
| 37 | 6  | 0 | -2.744335 | 0.112405  | -0.711214 |
| 38 | 6  | 0 | -3.047320 | -0.887145 | 0.131932  |
| 39 | 6  | 0 | -2.541916 | -2.290580 | -0.047974 |
| 40 | 1  | 0 | -3.398415 | -2.984950 | -0.011078 |
| 41 | 1  | 0 | -2.503842 | -0.185422 | -2.805399 |
| 42 | 8  | 0 | -1.708030 | -2.586407 | 1.093520  |
| 43 | 8  | 0 | -3.206529 | 1.392757  | -0.614548 |
| 44 | 14 | 0 | -4.321234 | 2.124713  | 0.445580  |
| 45 | 6  | 0 | -1.597674 | -3.967910 | 1.388441  |
| 46 | 1  | 0 | -0.993423 | -4.054383 | 2.294671  |
| 47 | 1  | 0 | -2.583806 | -4.420654 | 1.574246  |
| 48 | 1  | 0 | -1.104097 | -4.535011 | 0.587005  |
| 49 | 6  | 0 | -5.990486 | 1.261212  | 0.328653  |
| 50 | 1  | 0 | -5.948241 | 0.220427  | 0.662318  |
| 51 | 1  | 0 | -6.725536 | 1.782471  | 0.952488  |
| 52 | 1  | 0 | -6.362847 | 1.269906  | -0.701247 |
| 53 | 6  | 0 | -3.651491 | 2.113887  | 2.205022  |
| 54 | 1  | 0 | -3.537582 | 1.102710  | 2.606495  |
| 55 | 1  | 0 | -2.673632 | 2.604801  | 2.251450  |
| 56 | 1  | 0 | -4.330892 | 2.661753  | 2.868078  |
| 57 | 6  | 0 | -4.434774 | 3.881544  | -0.206789 |
| 58 | 1  | 0 | -3.459041 | 4.377487  | -0.180996 |
| 59 | 1  | 0 | -4.795469 | 3.898441  | -1.240384 |
| 60 | 1  | 0 | -5.127944 | 4.474684  | 0.399897  |
| 61 | 1  | 0 | -3.675818 | -0.714262 | 0.999817  |
| 62 | 1  | 0 | -1.300714 | 0.852140  | -2.085617 |

-----

TS2-IV

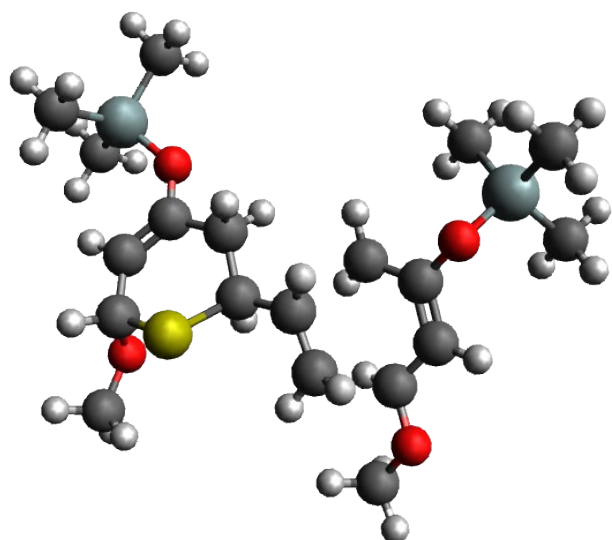

HF = -2023.8383123 hartrees  
 Imaginary Frequencies: 1 (-534.5200 1/cm)  
 Zero-point correction = 0.515522 (Hartree/Particle)  
 Temperature: 298.150 Kelvin. Pressure: 1.00000 Atm.  
 Sum of electronic and zero-point Energies = -2023.322791 hartrees

Coordinates:

| Center Number | Atomic Number | Atomic Type | Coordinates (Angstroms) |           |           |
|---------------|---------------|-------------|-------------------------|-----------|-----------|
|               |               |             | X                       | Y         | Z         |
| 1             | 6             | 0           | 3.272703                | 2.082073  | 0.480175  |
| 2             | 6             | 0           | 3.572480                | 0.667317  | 0.083800  |
| 3             | 1             | 0           | 4.588975                | 0.506611  | -0.262756 |
| 4             | 6             | 0           | 2.706376                | -0.358108 | 0.099957  |
| 5             | 6             | 0           | 1.246488                | -0.281090 | 0.472186  |
| 6             | 1             | 0           | 0.714954                | -0.918441 | -0.241096 |
| 7             | 1             | 0           | 1.108621                | -0.742506 | 1.459956  |
| 8             | 16            | 0           | 1.717386                | 2.253704  | 1.474277  |
| 9             | 6             | 0           | 0.632045                | 1.118275  | 0.464908  |
| 10            | 8             | 0           | 3.040165                | -1.637095 | -0.238925 |
| 11            | 14            | 0           | 4.543333                | -2.437050 | -0.334599 |
| 12            | 6             | 0           | 5.498975                | -2.180040 | 1.265658  |
| 13            | 1             | 0           | 5.711218                | -1.123866 | 1.455076  |
| 14            | 1             | 0           | 4.938538                | -2.569754 | 2.121869  |
| 15            | 1             | 0           | 6.455972                | -2.712049 | 1.222420  |
| 16            | 6             | 0           | 4.051401                | -4.235183 | -0.553627 |
| 17            | 1             | 0           | 3.451948                | -4.373942 | -1.459291 |
| 18            | 1             | 0           | 4.939713                | -4.870530 | -0.640171 |
| 19            | 1             | 0           | 3.464570                | -4.592667 | 0.298598  |
| 20            | 6             | 0           | 5.517046                | -1.841382 | -1.832782 |
| 21            | 1             | 0           | 4.914104                | -1.914215 | -2.744147 |
| 22            | 1             | 0           | 5.857007                | -0.805838 | -1.737069 |
| 23            | 1             | 0           | 6.404716                | -2.469554 | -1.971141 |
| 24            | 8             | 0           | 3.271344                | 2.873309  | -0.699163 |
| 25            | 1             | 0           | 4.052419                | 2.450220  | 1.163991  |
| 26            | 6             | 0           | 3.449788                | 4.264364  | -0.465964 |
| 27            | 1             | 0           | 4.396344                | 4.464415  | 0.057013  |
| 28            | 1             | 0           | 3.473042                | 4.749700  | -1.443882 |

|    |    |   |           |           |           |
|----|----|---|-----------|-----------|-----------|
| 29 | 1  | 0 | 2.625935  | 4.684013  | 0.125096  |
| 30 | 6  | 0 | -0.771535 | 1.192729  | 1.032209  |
| 31 | 1  | 0 | -0.960348 | 0.533768  | 1.874779  |
| 32 | 6  | 0 | -1.496828 | 2.383585  | 0.950165  |
| 33 | 1  | 0 | -1.025504 | 3.245943  | 0.487511  |
| 34 | 1  | 0 | -2.234334 | 2.617449  | 1.708223  |
| 35 | 1  | 0 | 0.654939  | 1.528411  | -0.551197 |
| 36 | 6  | 0 | -1.860930 | -0.314767 | -0.312414 |
| 37 | 6  | 0 | -3.197029 | -0.068641 | -0.015857 |
| 38 | 6  | 0 | -3.783943 | 1.189352  | -0.189782 |
| 39 | 6  | 0 | -3.042015 | 2.289540  | -0.618326 |
| 40 | 1  | 0 | -2.238109 | 2.178998  | -1.341371 |
| 41 | 1  | 0 | -1.396906 | 0.194386  | -1.148193 |
| 42 | 8  | 0 | -3.668406 | 3.503026  | -0.625116 |
| 43 | 8  | 0 | -3.910257 | -1.001650 | 0.719063  |
| 44 | 14 | 0 | -4.734051 | -2.331137 | 0.065478  |
| 45 | 6  | 0 | -3.016889 | 4.524953  | -1.377874 |
| 46 | 1  | 0 | -3.627269 | 5.423266  | -1.278350 |
| 47 | 1  | 0 | -2.011925 | 4.727642  | -0.989790 |
| 48 | 1  | 0 | -2.945033 | 4.251208  | -2.437367 |
| 49 | 6  | 0 | -3.540208 | -3.484388 | -0.825693 |
| 50 | 1  | 0 | -2.766745 | -3.860128 | -0.147514 |
| 51 | 1  | 0 | -4.079604 | -4.348719 | -1.230088 |
| 52 | 1  | 0 | -3.040668 | -2.983336 | -1.661064 |
| 53 | 6  | 0 | -5.492020 | -3.175007 | 1.562523  |
| 54 | 1  | 0 | -4.719431 | -3.502439 | 2.265989  |
| 55 | 1  | 0 | -6.170846 | -2.501646 | 2.095947  |
| 56 | 1  | 0 | -6.065242 | -4.058411 | 1.260140  |
| 57 | 6  | 0 | -6.062147 | -1.723173 | -1.123780 |
| 58 | 1  | 0 | -6.791879 | -1.087201 | -0.611637 |
| 59 | 1  | 0 | -5.629117 | -1.141719 | -1.944555 |
| 60 | 1  | 0 | -6.603338 | -2.568502 | -1.563689 |
| 61 | 1  | 0 | -4.766706 | 1.370569  | 0.235499  |
| 62 | 1  | 0 | -1.453454 | -1.288939 | -0.068242 |

---

## Product2-IV

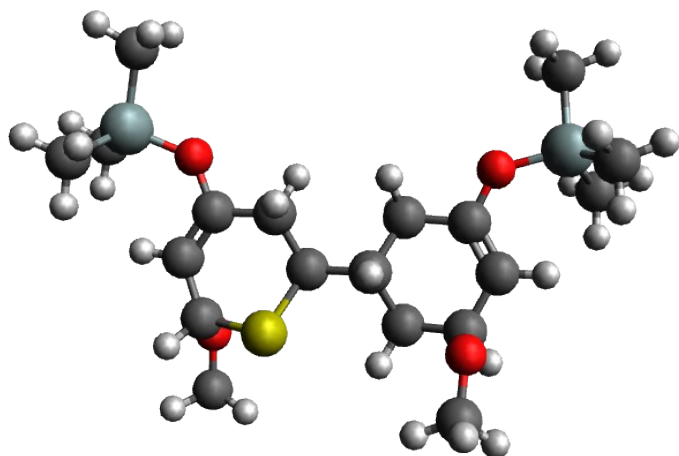

HF = -2023.9363025 hartrees

Imaginary Frequencies: none found

Zero-point correction = 0.521835 (Hartree/Particle)

Temperature: 298.150 Kelvin. Pressure: 1.00000 Atm.

Sum of electronic and zero-point Energies = -2023.414468 hartrees

Coordinates:

| Center Number | Atomic Number | Atomic Type | Coordinates (Angstroms) |           |           |
|---------------|---------------|-------------|-------------------------|-----------|-----------|
|               |               |             | X                       | Y         | Z         |
| 1             | 6             | 0           | -3.166240               | 2.119710  | 0.290508  |
| 2             | 6             | 0           | -3.647000               | 0.701099  | 0.209194  |
| 3             | 1             | 0           | -4.702030               | 0.575736  | 0.432909  |
| 4             | 6             | 0           | -2.894655               | -0.371558 | -0.083951 |
| 5             | 6             | 0           | -1.407031               | -0.360427 | -0.335988 |
| 6             | 1             | 0           | -1.004725               | -1.246215 | 0.168617  |
| 7             | 1             | 0           | -1.226513               | -0.507332 | -1.410174 |
| 8             | 16            | 0           | -1.525703               | 2.385710  | -0.532039 |
| 9             | 6             | 0           | -0.674163               | 0.890073  | 0.154305  |
| 10            | 8             | 0           | -3.383903               | -1.640113 | -0.185644 |
| 11            | 14            | 0           | -4.970682               | -2.251547 | -0.318282 |
| 12            | 6             | 0           | -5.862938               | -1.409397 | -1.745136 |
| 13            | 1             | 0           | -5.972680               | -0.332245 | -1.590434 |
| 14            | 1             | 0           | -5.323718               | -1.561216 | -2.686051 |
| 15            | 1             | 0           | -6.865975               | -1.834808 | -1.862970 |
| 16            | 6             | 0           | -4.691774               | -4.072866 | -0.675829 |
| 17            | 1             | 0           | -4.130934               | -4.553495 | 0.132368  |
| 18            | 1             | 0           | -5.648340               | -4.597274 | -0.777240 |
| 19            | 1             | 0           | -4.131845               | -4.213042 | -1.606038 |
| 20            | 6             | 0           | -5.893421               | -2.037182 | 1.309194  |
| 21            | 1             | 0           | -5.327310               | -2.475513 | 2.137919  |
| 22            | 1             | 0           | -6.088682               | -0.988892 | 1.553935  |
| 23            | 1             | 0           | -6.860061               | -2.551523 | 1.258651  |
| 24            | 8             | 0           | -3.178049               | 2.508674  | 1.654240  |
| 25            | 1             | 0           | -3.840057               | 2.774276  | -0.282027 |
| 26            | 6             | 0           | -3.188408               | 3.916024  | 1.858539  |
| 27            | 1             | 0           | -4.063662               | 4.382539  | 1.383697  |
| 28            | 1             | 0           | -3.237429               | 4.079289  | 2.937004  |
| 29            | 1             | 0           | -2.280003               | 4.387590  | 1.463234  |
| 30            | 6             | 0           | 0.823264                | 0.915852  | -0.218451 |
| 31            | 1             | 0           | 0.904146                | 0.986643  | -1.311838 |

|    |    |   |           |           |           |
|----|----|---|-----------|-----------|-----------|
| 32 | 6  | 0 | 1.570727  | 2.116969  | 0.381484  |
| 33 | 1  | 0 | 1.590214  | 2.026054  | 1.476071  |
| 34 | 1  | 0 | 1.053765  | 3.052996  | 0.154698  |
| 35 | 1  | 0 | -0.775842 | 0.960524  | 1.244032  |
| 36 | 6  | 0 | 1.536467  | -0.375952 | 0.224375  |
| 37 | 6  | 0 | 3.037187  | -0.292957 | 0.096110  |
| 38 | 6  | 0 | 3.705570  | 0.857443  | -0.080750 |
| 39 | 6  | 0 | 3.014187  | 2.189532  | -0.135791 |
| 40 | 1  | 0 | 3.574158  | 2.911450  | 0.480945  |
| 41 | 1  | 0 | 1.285891  | -0.610188 | 1.270302  |
| 42 | 8  | 0 | 3.067432  | 2.648545  | -1.503784 |
| 43 | 8  | 0 | 3.608713  | -1.529202 | 0.186896  |
| 44 | 14 | 0 | 5.233270  | -2.020660 | 0.333134  |
| 45 | 6  | 0 | 2.964891  | 4.054951  | -1.646204 |
| 46 | 1  | 0 | 3.078445  | 4.278879  | -2.709967 |
| 47 | 1  | 0 | 1.993955  | 4.447613  | -1.312201 |
| 48 | 1  | 0 | 3.756510  | 4.577868  | -1.088008 |
| 49 | 6  | 0 | 6.019593  | -1.202975 | 1.835616  |
| 50 | 1  | 0 | 5.469163  | -1.453697 | 2.748575  |
| 51 | 1  | 0 | 7.049371  | -1.556786 | 1.959642  |
| 52 | 1  | 0 | 6.048887  | -0.113035 | 1.749106  |
| 53 | 6  | 0 | 5.094867  | -3.877020 | 0.577155  |
| 54 | 1  | 0 | 4.521655  | -4.116909 | 1.478536  |
| 55 | 1  | 0 | 4.599170  | -4.352769 | -0.275307 |
| 56 | 1  | 0 | 6.087971  | -4.327917 | 0.681153  |
| 57 | 6  | 0 | 6.182051  | -1.634619 | -1.247015 |
| 58 | 1  | 0 | 5.685296  | -2.077210 | -2.116943 |
| 59 | 1  | 0 | 6.283107  | -0.560697 | -1.429339 |
| 60 | 1  | 0 | 7.191179  | -2.058688 | -1.188978 |
| 61 | 1  | 0 | 4.783052  | 0.860502  | -0.210316 |
| 62 | 1  | 0 | 1.206311  | -1.236409 | -0.366703 |

---

TS2-V

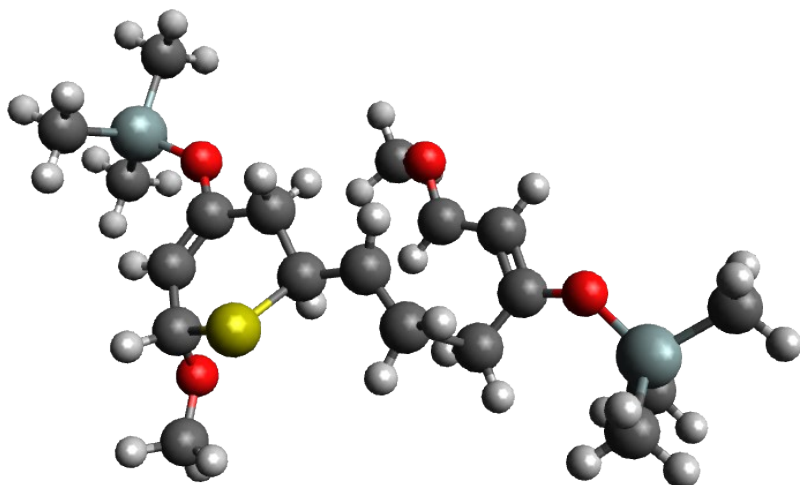

HF = -2023.8389869 hartrees  
 Imaginary Frequencies: 1 (-512.4581 1/cm)  
 Zero-point correction = 0.515597 (Hartree/Particle)  
 Temperature: 298.150 Kelvin. Pressure: 1.00000 Atm.  
 Sum of electronic and zero-point Energies = -2023.323390 hartrees

Coordinates:

| Center Number | Atomic Number | Atomic Type | Coordinates (Angstroms) |           |           |
|---------------|---------------|-------------|-------------------------|-----------|-----------|
|               |               |             | X                       | Y         | Z         |
| 1             | 6             | 0           | -3.436109               | 2.042521  | -0.806187 |
| 2             | 6             | 0           | -3.701676               | 0.630207  | -0.370285 |
| 3             | 1             | 0           | -4.740317               | 0.431725  | -0.123000 |
| 4             | 6             | 0           | -2.793673               | -0.351715 | -0.246239 |
| 5             | 6             | 0           | -1.307927               | -0.215536 | -0.479212 |
| 6             | 1             | 0           | -0.813193               | -0.819617 | 0.291990  |
| 7             | 1             | 0           | -1.062585               | -0.685509 | -1.439917 |
| 8             | 16            | 0           | -1.786633               | 2.254480  | -1.628901 |
| 9             | 6             | 0           | -0.784522               | 1.218770  | -0.426203 |
| 10            | 8             | 0           | -3.102319               | -1.629625 | 0.119414  |
| 11            | 14            | 0           | -4.577475               | -2.484727 | 0.162586  |
| 12            | 6             | 0           | -5.437959               | -2.357146 | -1.505825 |
| 13            | 1             | 0           | -5.691237               | -1.325082 | -1.764617 |
| 14            | 1             | 0           | -4.804827               | -2.758923 | -2.303837 |
| 15            | 1             | 0           | -6.367698               | -2.937090 | -1.493223 |
| 16            | 6             | 0           | -4.032213               | -4.246614 | 0.511997  |
| 17            | 1             | 0           | -3.490080               | -4.312796 | 1.460971  |
| 18            | 1             | 0           | -4.899322               | -4.913231 | 0.575339  |
| 19            | 1             | 0           | -3.376339               | -4.623442 | -0.279391 |
| 20            | 6             | 0           | -5.667713               | -1.849714 | 1.560757  |
| 21            | 1             | 0           | -5.126675               | -1.859947 | 2.512909  |
| 22            | 1             | 0           | -6.029213               | -0.831145 | 1.391124  |
| 23            | 1             | 0           | -6.544563               | -2.498353 | 1.670410  |
| 24            | 8             | 0           | -3.613048               | 2.883318  | 0.324157  |
| 25            | 1             | 0           | -4.154382               | 2.329629  | -1.588968 |
| 26            | 6             | 0           | -3.828226               | 4.251318  | 0.002461  |
| 27            | 1             | 0           | -4.716037               | 4.377705  | -0.634339 |
| 28            | 1             | 0           | -3.987612               | 4.777921  | 0.945666  |
| 29            | 1             | 0           | -2.961637               | 4.686107  | -0.511176 |
| 30            | 6             | 0           | 0.675919                | 1.412849  | -0.720720 |

|    |    |   |           |           |           |
|----|----|---|-----------|-----------|-----------|
| 31 | 1  | 0 | 1.057986  | 2.391092  | -0.450108 |
| 32 | 6  | 0 | 1.401704  | 0.646669  | -1.642277 |
| 33 | 1  | 0 | 0.863627  | -0.066320 | -2.262790 |
| 34 | 1  | 0 | 2.224309  | 1.127666  | -2.162749 |
| 35 | 1  | 0 | -1.028891 | 1.652118  | 0.548703  |
| 36 | 6  | 0 | 1.683191  | 0.787425  | 1.527013  |
| 37 | 6  | 0 | 3.003666  | 0.743714  | 1.124542  |
| 38 | 1  | 0 | 3.689944  | 1.468858  | 1.552687  |
| 39 | 6  | 0 | 3.447585  | -0.031855 | 0.042037  |
| 40 | 6  | 0 | 2.560736  | -0.763457 | -0.761841 |
| 41 | 1  | 0 | 2.981536  | -1.304750 | -1.604316 |
| 42 | 1  | 0 | 1.736377  | -1.275341 | -0.278339 |
| 43 | 8  | 0 | 4.724426  | 0.218352  | -0.420567 |
| 44 | 14 | 0 | 6.059904  | -0.815459 | -0.250769 |
| 45 | 6  | 0 | 6.385658  | -1.111058 | 1.580013  |
| 46 | 1  | 0 | 6.605383  | -0.172914 | 2.100360  |
| 47 | 1  | 0 | 5.521940  | -1.572224 | 2.070571  |
| 48 | 1  | 0 | 7.242670  | -1.780177 | 1.716680  |
| 49 | 6  | 0 | 5.757451  | -2.451835 | -1.133443 |
| 50 | 1  | 0 | 5.563209  | -2.300595 | -2.200542 |
| 51 | 1  | 0 | 6.638882  | -3.097115 | -1.042363 |
| 52 | 1  | 0 | 4.905556  | -2.992268 | -0.708418 |
| 53 | 6  | 0 | 7.466791  | 0.131768  | -1.056242 |
| 54 | 1  | 0 | 7.256768  | 0.330699  | -2.112303 |
| 55 | 1  | 0 | 7.634351  | 1.092340  | -0.558371 |
| 56 | 1  | 0 | 8.399166  | -0.441071 | -1.002676 |
| 57 | 1  | 0 | 0.993008  | -0.034103 | 1.369075  |
| 58 | 8  | 0 | 1.302501  | 1.716670  | 2.442642  |
| 59 | 6  | 0 | 0.252402  | 1.321799  | 3.331153  |
| 60 | 1  | 0 | 0.599714  | 0.547709  | 4.025051  |
| 61 | 1  | 0 | -0.032615 | 2.212291  | 3.892253  |
| 62 | 1  | 0 | -0.618071 | 0.948690  | 2.780468  |

---



## Product2-V

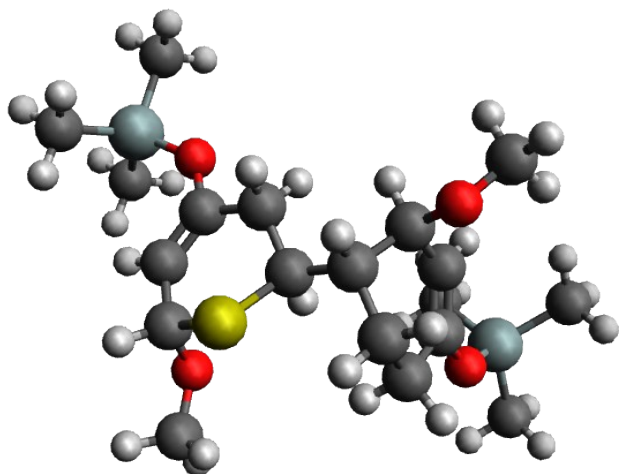

HF = -2023.934742 hartrees

Imaginary Frequencies: none found

Zero-point correction = 0.521989 (Hartree/Particle)

Temperature: 298.150 Kelvin. Pressure: 1.00000 Atm.

Sum of electronic and zero-point Energies = -2023.412753 hartrees

Coordinates:

| Center Number | Atomic Number | Atomic Type | Coordinates (Angstroms) |           |           |
|---------------|---------------|-------------|-------------------------|-----------|-----------|
|               |               |             | X                       | Y         | Z         |
| 1             | 6             | 0           | 3.024288                | -2.295911 | -0.375128 |
| 2             | 6             | 0           | 3.662279                | -0.954202 | -0.158984 |
| 3             | 1             | 0           | 4.726889                | -1.000027 | 0.049315  |
| 4             | 6             | 0           | 3.038278                | 0.234964  | -0.174684 |
| 5             | 6             | 0           | 1.558371                | 0.445394  | -0.382865 |
| 6             | 1             | 0           | 1.254152                | 1.245277  | 0.303516  |
| 7             | 1             | 0           | 1.402785                | 0.833649  | -1.397538 |
| 8             | 16            | 0           | 1.351647                | -2.191924 | -1.172423 |
| 9             | 6             | 0           | 0.706435                | -0.800286 | -0.136976 |
| 10            | 8             | 0           | 3.672379                | 1.430089  | -0.004875 |
| 11            | 14            | 0           | 5.319924                | 1.870486  | -0.019596 |
| 12            | 6             | 0           | 6.123622                | 1.292001  | -1.619985 |
| 13            | 1             | 0           | 6.115777                | 0.202950  | -1.721059 |
| 14            | 1             | 0           | 5.609903                | 1.714817  | -2.489739 |
| 15            | 1             | 0           | 7.167517                | 1.623750  | -1.655390 |
| 16            | 6             | 0           | 5.253728                | 3.744460  | 0.063396  |
| 17            | 1             | 0           | 4.745066                | 4.082802  | 0.971988  |
| 18            | 1             | 0           | 6.264643                | 4.166567  | 0.068943  |
| 19            | 1             | 0           | 4.721009                | 4.160843  | -0.797625 |
| 20            | 6             | 0           | 6.199565                | 1.177230  | 1.494252  |
| 21            | 1             | 0           | 5.680187                | 1.467386  | 2.413701  |
| 22            | 1             | 0           | 6.274115                | 0.085819  | 1.481320  |
| 23            | 1             | 0           | 7.218242                | 1.578560  | 1.547468  |
| 24            | 8             | 0           | 3.008836                | -2.974812 | 0.869382  |
| 25            | 1             | 0           | 3.613741                | -2.875702 | -1.100745 |
| 26            | 6             | 0           | 2.851177                | -4.384251 | 0.762979  |
| 27            | 1             | 0           | 3.654995                | -4.832092 | 0.160787  |
| 28            | 1             | 0           | 2.898277                | -4.785581 | 1.777277  |
| 29            | 1             | 0           | 1.885309                | -4.649138 | 0.315023  |
| 30            | 6             | 0           | -0.809429               | -0.630196 | -0.372045 |
| 31            | 1             | 0           | -1.253329               | -1.631886 | -0.291511 |

|    |    |   |           |           |           |
|----|----|---|-----------|-----------|-----------|
| 32 | 6  | 0 | -1.196186 | -0.049311 | -1.741570 |
| 33 | 1  | 0 | -0.882594 | 1.000181  | -1.801932 |
| 34 | 1  | 0 | -0.672552 | -0.581370 | -2.542375 |
| 35 | 1  | 0 | 0.840118  | -1.124594 | 0.898665  |
| 36 | 6  | 0 | -1.465531 | 0.197641  | 0.748278  |
| 37 | 6  | 0 | -2.914651 | 0.505508  | 0.450952  |
| 38 | 1  | 0 | -3.504762 | 0.885905  | 1.279000  |
| 39 | 6  | 0 | -3.481219 | 0.328432  | -0.752917 |
| 40 | 6  | 0 | -2.710578 | -0.132321 | -1.962550 |
| 41 | 1  | 0 | -3.011597 | -1.162013 | -2.202937 |
| 42 | 1  | 0 | -3.013369 | 0.478943  | -2.820873 |
| 43 | 8  | 0 | -4.798377 | 0.555104  | -1.040184 |
| 44 | 14 | 0 | -6.173396 | 0.596410  | -0.037213 |
| 45 | 6  | 0 | -6.227181 | -0.956594 | 1.024094  |
| 46 | 1  | 0 | -6.300677 | -1.853701 | 0.400460  |
| 47 | 1  | 0 | -5.335172 | -1.054874 | 1.649739  |
| 48 | 1  | 0 | -7.101077 | -0.935562 | 1.684845  |
| 49 | 6  | 0 | -6.184942 | 2.156108  | 1.020327  |
| 50 | 1  | 0 | -6.035610 | 3.048881  | 0.403750  |
| 51 | 1  | 0 | -7.155425 | 2.256974  | 1.520092  |
| 52 | 1  | 0 | -5.413807 | 2.150470  | 1.796653  |
| 53 | 6  | 0 | -7.595555 | 0.637522  | -1.262610 |
| 54 | 1  | 0 | -7.537922 | 1.521090  | -1.906771 |
| 55 | 1  | 0 | -7.591200 | -0.249400 | -1.904382 |
| 56 | 1  | 0 | -8.557126 | 0.668211  | -0.738417 |
| 57 | 1  | 0 | -0.908677 | 1.140014  | 0.891397  |
| 58 | 8  | 0 | -1.342044 | -0.570852 | 1.957763  |
| 59 | 6  | 0 | -1.417020 | 0.196381  | 3.146304  |
| 60 | 1  | 0 | -2.401379 | 0.665520  | 3.285445  |
| 61 | 1  | 0 | -1.240716 | -0.487378 | 3.980203  |
| 62 | 1  | 0 | -0.652544 | 0.987304  | 3.167504  |

---

TS2-VI

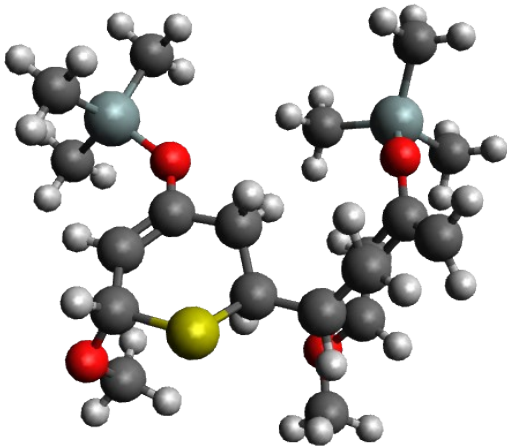

HF = -2023.8379701 hartrees  
 Imaginary Frequencies: 1 (-515.4318 1/cm)  
 Zero-point correction = 0.516519 (Hartree/Particle)  
 Temperature: 298.150 Kelvin. Pressure: 1.00000 Atm.  
 Sum of electronic and zero-point Energies = -2023.321451 hartrees

Coordinates:

| Center Number | Atomic Number | Atomic Type | Coordinates (Angstroms) |           |           |
|---------------|---------------|-------------|-------------------------|-----------|-----------|
|               |               |             | X                       | Y         | Z         |
| 1             | 6             | 0           | -3.660910               | -1.266560 | 0.562445  |
| 2             | 6             | 0           | -3.102245               | 0.081315  | 0.195557  |
| 3             | 1             | 0           | -3.852663               | 0.753005  | -0.213063 |
| 4             | 6             | 0           | -1.844217               | 0.524280  | 0.364635  |
| 5             | 6             | 0           | -0.683705               | -0.293696 | 0.876287  |
| 6             | 1             | 0           | 0.221538                | 0.078193  | 0.385589  |
| 7             | 1             | 0           | -0.562339               | -0.096888 | 1.949050  |
| 8             | 16            | 0           | -2.426684               | -2.392362 | 1.373774  |
| 9             | 6             | 0           | -0.818733               | -1.790502 | 0.614889  |
| 10            | 8             | 0           | -1.452096               | 1.803469  | 0.092866  |
| 11            | 14            | 0           | -2.336485               | 3.243094  | -0.142328 |
| 12            | 6             | 0           | -3.530007               | 3.504321  | 1.289183  |
| 13            | 1             | 0           | -2.992727               | 3.534845  | 2.242902  |
| 14            | 1             | 0           | -4.052192               | 4.460431  | 1.169970  |
| 15            | 1             | 0           | -4.285798               | 2.716535  | 1.353492  |
| 16            | 6             | 0           | -1.000976               | 4.562294  | -0.151947 |
| 17            | 1             | 0           | -0.271925               | 4.382576  | -0.948789 |
| 18            | 1             | 0           | -1.437734               | 5.553760  | -0.314913 |
| 19            | 1             | 0           | -0.461571               | 4.585732  | 0.800478  |
| 20            | 6             | 0           | -3.228124               | 3.204093  | -1.800863 |
| 21            | 1             | 0           | -2.527607               | 2.985369  | -2.613840 |
| 22            | 1             | 0           | -4.028370               | 2.458928  | -1.837366 |
| 23            | 1             | 0           | -3.677298               | 4.183117  | -2.004132 |
| 24            | 8             | 0           | -4.387784               | -1.865274 | -0.504971 |
| 25            | 1             | 0           | -4.425827               | -1.142159 | 1.336475  |
| 26            | 6             | 0           | -3.637494               | -2.173823 | -1.671673 |
| 27            | 1             | 0           | -2.896022               | -2.959153 | -1.474678 |
| 28            | 1             | 0           | -4.351770               | -2.541116 | -2.411852 |
| 29            | 1             | 0           | -3.123065               | -1.292222 | -2.073689 |
| 30            | 6             | 0           | 0.283717                | -2.663589 | 1.153024  |
| 31            | 1             | 0           | 0.143984                | -3.723129 | 0.951168  |

|    |    |   |           |           |           |
|----|----|---|-----------|-----------|-----------|
| 32 | 6  | 0 | 1.145447  | -2.317754 | 2.199333  |
| 33 | 1  | 0 | 1.010447  | -1.367667 | 2.706394  |
| 34 | 1  | 0 | 1.488844  | -3.113041 | 2.854368  |
| 35 | 1  | 0 | -0.927234 | -1.949774 | -0.462677 |
| 36 | 6  | 0 | 1.721069  | -2.574214 | -0.856932 |
| 37 | 6  | 0 | 2.304876  | -1.335038 | -0.659448 |
| 38 | 6  | 0 | 2.986305  | -1.011218 | 0.526009  |
| 39 | 6  | 0 | 3.092845  | -1.928167 | 1.575885  |
| 40 | 1  | 0 | 3.263594  | -2.968114 | 1.324944  |
| 41 | 1  | 0 | 2.088503  | -3.478332 | -0.386406 |
| 42 | 8  | 0 | 0.931571  | -2.749997 | -1.947534 |
| 43 | 8  | 0 | 3.304622  | 0.296348  | 0.805043  |
| 44 | 14 | 0 | 3.961247  | 1.514905  | -0.174962 |
| 45 | 6  | 0 | 5.366699  | 0.801893  | -1.204595 |
| 46 | 1  | 0 | 5.808121  | 1.579233  | -1.838336 |
| 47 | 1  | 0 | 6.159729  | 0.398694  | -0.566119 |
| 48 | 1  | 0 | 5.018891  | -0.003892 | -1.858893 |
| 49 | 6  | 0 | 4.582233  | 2.785407  | 1.060820  |
| 50 | 1  | 0 | 3.765811  | 3.157551  | 1.688576  |
| 51 | 1  | 0 | 5.345842  | 2.358135  | 1.718706  |
| 52 | 1  | 0 | 5.024450  | 3.644502  | 0.544318  |
| 53 | 6  | 0 | 2.641221  | 2.282967  | -1.280794 |
| 54 | 1  | 0 | 2.352124  | 1.629384  | -2.109996 |
| 55 | 1  | 0 | 1.737980  | 2.521040  | -0.709112 |
| 56 | 1  | 0 | 3.017429  | 3.216575  | -1.715438 |
| 57 | 6  | 0 | 0.586196  | -4.106434 | -2.243382 |
| 58 | 1  | 0 | -0.070012 | -4.077336 | -3.113392 |
| 59 | 1  | 0 | 1.479929  | -4.694764 | -2.479686 |
| 60 | 1  | 0 | 0.057313  | -4.569038 | -1.402936 |
| 61 | 1  | 0 | 2.049507  | -0.549167 | -1.363149 |
| 62 | 1  | 0 | 3.594725  | -1.595816 | 2.479879  |

---

## Product2-VI

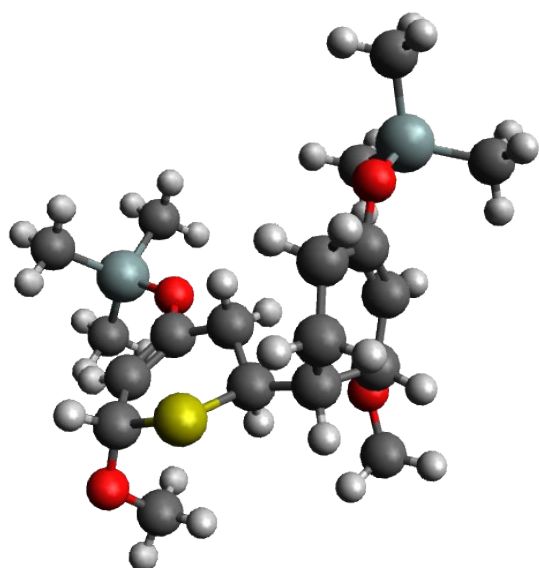

HF = -2023.9262385 hartrees

Imaginary Frequencies: none found

Zero-point correction = 0.522527 (Hartree/Particle)

Temperature: 298.150 Kelvin. Pressure: 1.00000 Atm.

Sum of electronic and zero-point Energies = -2023.403711 hartrees

Coordinates:

| Center Number | Atomic Number | Atomic Type | Coordinates (Angstroms) |           |           |
|---------------|---------------|-------------|-------------------------|-----------|-----------|
|               |               |             | X                       | Y         | Z         |
| 1             | 6             | 0           | 3.442131                | -1.386594 | -1.079893 |
| 2             | 6             | 0           | 3.139223                | -0.033252 | -0.499819 |
| 3             | 1             | 0           | 4.028180                | 0.577751  | -0.368216 |
| 4             | 6             | 0           | 1.934419                | 0.478249  | -0.193914 |
| 5             | 6             | 0           | 0.619284                | -0.257871 | -0.274131 |
| 6             | 1             | 0           | -0.007270               | 0.109256  | 0.543765  |
| 7             | 1             | 0           | 0.118371                | 0.022606  | -1.207103 |
| 8             | 16            | 0           | 1.935040                | -2.411177 | -1.435613 |
| 9             | 6             | 0           | 0.763074                | -1.773259 | -0.144875 |
| 10            | 8             | 0           | 1.744685                | 1.757882  | 0.237463  |
| 11            | 14            | 0           | 2.745458                | 3.138716  | 0.218273  |
| 12            | 6             | 0           | 3.368390                | 3.452627  | -1.529589 |
| 13            | 1             | 0           | 2.532369                | 3.579815  | -2.225308 |
| 14            | 1             | 0           | 3.965783                | 4.371075  | -1.554524 |
| 15            | 1             | 0           | 3.994990                | 2.636813  | -1.901310 |
| 16            | 6             | 0           | 1.586827                | 4.504555  | 0.779430  |
| 17            | 1             | 0           | 1.191929                | 4.302259  | 1.780334  |
| 18            | 1             | 0           | 2.111184                | 5.465870  | 0.814253  |
| 19            | 1             | 0           | 0.738029                | 4.609553  | 0.096021  |
| 20            | 6             | 0           | 4.165655                | 2.941906  | 1.439593  |
| 21            | 1             | 0           | 3.790825                | 2.680417  | 2.434857  |
| 22            | 1             | 0           | 4.884032                | 2.173763  | 1.138153  |
| 23            | 1             | 0           | 4.711325                | 3.888417  | 1.528621  |
| 24            | 8             | 0           | 4.455552                | -2.077593 | -0.360888 |
| 25            | 1             | 0           | 3.888803                | -1.264570 | -2.072168 |
| 26            | 6             | 0           | 4.150370                | -2.406999 | 0.987938  |
| 27            | 1             | 0           | 3.342758                | -3.148288 | 1.045038  |
| 28            | 1             | 0           | 5.057421                | -2.841410 | 1.413555  |

|    |    |   |           |           |           |
|----|----|---|-----------|-----------|-----------|
| 29 | 1  | 0 | 3.865613  | -1.522935 | 1.571498  |
| 30 | 6  | 0 | -0.517765 | -2.647137 | -0.174535 |
| 31 | 1  | 0 | -0.154463 | -3.664947 | 0.015714  |
| 32 | 6  | 0 | -1.309843 | -2.721207 | -1.498350 |
| 33 | 1  | 0 | -0.641019 | -2.971742 | -2.327188 |
| 34 | 1  | 0 | -2.006350 | -3.563505 | -1.404778 |
| 35 | 1  | 0 | 1.238606  | -1.965602 | 0.819502  |
| 36 | 6  | 0 | -1.513134 | -2.301244 | 0.968218  |
| 37 | 6  | 0 | -2.464049 | -1.185787 | 0.618295  |
| 38 | 6  | 0 | -2.747924 | -0.817062 | -0.640035 |
| 39 | 6  | 0 | -2.118142 | -1.461243 | -1.845667 |
| 40 | 1  | 0 | -2.915036 | -1.714090 | -2.556067 |
| 41 | 1  | 0 | -2.096978 | -3.217676 | 1.170654  |
| 42 | 8  | 0 | -0.862994 | -1.930426 | 2.191043  |
| 43 | 8  | 0 | -3.624024 | 0.169218  | -0.993708 |
| 44 | 14 | 0 | -4.473728 | 1.318975  | -0.069210 |
| 45 | 6  | 0 | -5.741800 | 0.465336  | 1.031449  |
| 46 | 1  | 0 | -6.354090 | 1.214756  | 1.546119  |
| 47 | 1  | 0 | -6.414782 | -0.161642 | 0.436900  |
| 48 | 1  | 0 | -5.280443 | -0.167536 | 1.795243  |
| 49 | 6  | 0 | -5.333682 | 2.361370  | -1.372668 |
| 50 | 1  | 0 | -4.609129 | 2.840651  | -2.038953 |
| 51 | 1  | 0 | -6.006361 | 1.753161  | -1.986141 |
| 52 | 1  | 0 | -5.930900 | 3.150842  | -0.903177 |
| 53 | 6  | 0 | -3.270939 | 2.360434  | 0.936723  |
| 54 | 1  | 0 | -2.723918 | 1.769190  | 1.676725  |
| 55 | 1  | 0 | -2.536402 | 2.846183  | 0.285711  |
| 56 | 1  | 0 | -3.813564 | 3.147685  | 1.472490  |
| 57 | 6  | 0 | -0.367065 | -3.029969 | 2.938658  |
| 58 | 1  | 0 | 0.012888  | -2.629569 | 3.881493  |
| 59 | 1  | 0 | -1.161640 | -3.759086 | 3.154702  |
| 60 | 1  | 0 | 0.452325  | -3.554480 | 2.427496  |
| 61 | 1  | 0 | -2.954248 | -0.717754 | 1.465990  |
| 62 | 1  | 0 | -1.499655 | -0.713837 | -2.359251 |

---

TS2-VII

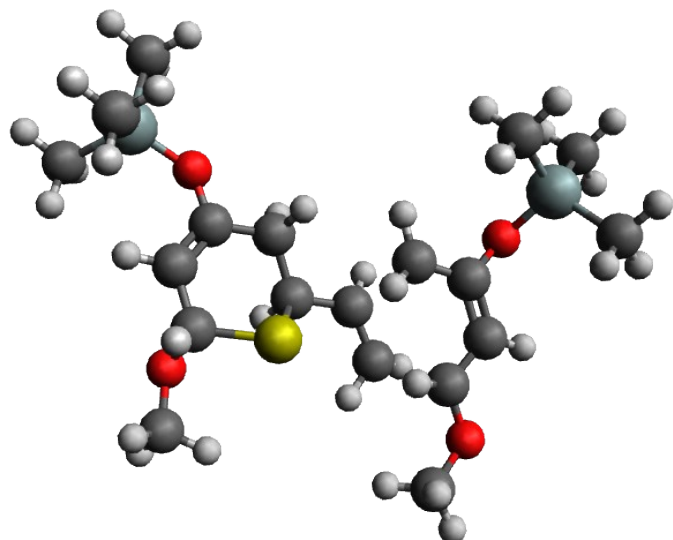

HF = -2023.8355427 hartrees  
 Imaginary Frequencies: 1 (-549.5131 1/cm)  
 Zero-point correction = 0.515473 (Hartree/Particle)  
 Temperature: 298.150 Kelvin. Pressure: 1.00000 Atm.  
 Sum of electronic and zero-point Energies = -2023.320070 hartrees

Coordinates:

| Center Number | Atomic Number | Atomic Type | Coordinates (Angstroms) |           |           |
|---------------|---------------|-------------|-------------------------|-----------|-----------|
|               |               |             | X                       | Y         | Z         |
| 1             | 6             | 0           | 2.693417                | 2.045471  | 0.731826  |
| 2             | 6             | 0           | 3.370643                | 0.757155  | 0.361730  |
| 3             | 1             | 0           | 4.429283                | 0.731702  | 0.601649  |
| 4             | 6             | 0           | 2.799617                | -0.300445 | -0.239145 |
| 5             | 6             | 0           | 1.362369                | -0.378354 | -0.689903 |
| 6             | 1             | 0           | 1.354769                | -0.878907 | -1.666950 |
| 7             | 1             | 0           | 0.812778                | -1.031881 | -0.003023 |
| 8             | 16            | 0           | 0.841064                | 1.916804  | 0.767326  |
| 9             | 6             | 0           | 0.675995                | 0.979551  | -0.823034 |
| 10            | 8             | 0           | 3.455365                | -1.461104 | -0.522007 |
| 11            | 14            | 0           | 4.959558                | -2.086196 | -0.015873 |
| 12            | 6             | 0           | 5.044884                | -2.102174 | 1.864048  |
| 13            | 1             | 0           | 4.986631                | -1.097655 | 2.292762  |
| 14            | 1             | 0           | 4.228022                | -2.696612 | 2.286572  |
| 15            | 1             | 0           | 5.988907                | -2.551837 | 2.192064  |
| 16            | 6             | 0           | 4.942824                | -3.831390 | -0.706058 |
| 17            | 1             | 0           | 4.845206                | -3.825048 | -1.796527 |
| 18            | 1             | 0           | 5.872883                | -4.353766 | -0.456299 |
| 19            | 1             | 0           | 4.110820                | -4.412335 | -0.295243 |
| 20            | 6             | 0           | 6.370929                | -1.094668 | -0.771318 |
| 21            | 1             | 0           | 6.268245                | -1.038563 | -1.860193 |
| 22            | 1             | 0           | 6.427379                | -0.072044 | -0.386627 |
| 23            | 1             | 0           | 7.326886                | -1.584491 | -0.552636 |
| 24            | 8             | 0           | 3.163782                | 3.054911  | -0.144959 |
| 25            | 1             | 0           | 2.945501                | 2.313651  | 1.768315  |
| 26            | 6             | 0           | 2.980409                | 4.379892  | 0.339014  |
| 27            | 1             | 0           | 3.491584                | 4.527884  | 1.301173  |
| 28            | 1             | 0           | 3.415062                | 5.051343  | -0.404047 |

|    |    |   |           |           |           |
|----|----|---|-----------|-----------|-----------|
| 29 | 1  | 0 | 1.917035  | 4.619790  | 0.463763  |
| 30 | 6  | 0 | -0.758287 | 0.918479  | -1.327499 |
| 31 | 1  | 0 | -0.931805 | 0.095811  | -2.015534 |
| 32 | 6  | 0 | -1.507110 | 2.082507  | -1.503971 |
| 33 | 1  | 0 | -1.068788 | 3.033473  | -1.215720 |
| 34 | 1  | 0 | -2.241351 | 2.131581  | -2.298442 |
| 35 | 1  | 0 | 1.257457  | 1.573142  | -1.539892 |
| 36 | 6  | 0 | -1.829634 | -0.330829 | 0.253003  |
| 37 | 6  | 0 | -3.164479 | -0.194757 | -0.115046 |
| 38 | 6  | 0 | -3.798736 | 1.049270  | -0.198694 |
| 39 | 6  | 0 | -3.110607 | 2.240794  | 0.026671  |
| 40 | 1  | 0 | -2.320605 | 2.306809  | 0.769173  |
| 41 | 1  | 0 | -1.407491 | 0.334571  | 0.994962  |
| 42 | 8  | 0 | -3.780958 | 3.405560  | -0.216819 |
| 43 | 8  | 0 | -3.823943 | -1.277736 | -0.676768 |
| 44 | 14 | 0 | -4.641502 | -2.473284 | 0.202636  |
| 45 | 6  | 0 | -3.176916 | 4.581998  | 0.318081  |
| 46 | 1  | 0 | -3.821369 | 5.417425  | 0.041721  |
| 47 | 1  | 0 | -3.103155 | 4.527240  | 1.410896  |
| 48 | 1  | 0 | -2.177222 | 4.742976  | -0.101531 |
| 49 | 6  | 0 | -6.030737 | -1.681956 | 1.198650  |
| 50 | 1  | 0 | -6.757434 | -1.189047 | 0.544247  |
| 51 | 1  | 0 | -6.565071 | -2.437752 | 1.785370  |
| 52 | 1  | 0 | -5.644740 | -0.930748 | 1.895731  |
| 53 | 6  | 0 | -5.318260 | -3.625500 | -1.117574 |
| 54 | 1  | 0 | -5.993742 | -3.096593 | -1.797822 |
| 55 | 1  | 0 | -4.510504 | -4.061067 | -1.714952 |
| 56 | 1  | 0 | -5.878901 | -4.449329 | -0.662093 |
| 57 | 6  | 0 | -3.458458 | -3.386556 | 1.350084  |
| 58 | 1  | 0 | -2.652302 | -3.871311 | 0.789283  |
| 59 | 1  | 0 | -3.001057 | -2.711097 | 2.080113  |
| 60 | 1  | 0 | -3.994618 | -4.164590 | 1.905825  |
| 61 | 1  | 0 | -4.773248 | 1.106312  | -0.674958 |
| 62 | 1  | 0 | -1.386009 | -1.319168 | 0.206205  |

---



## Product2-VII

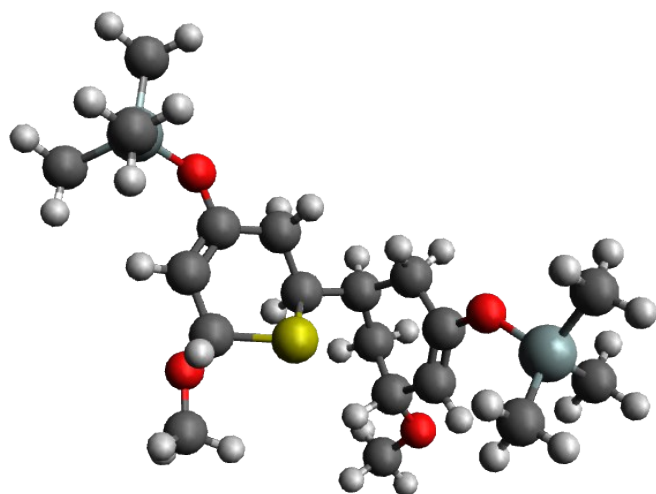

HF = -2023.9303045 hartrees

Imaginary Frequencies: none found

Zero-point correction = 0.521868 (Hartree/Particle)

Temperature: 298.150 Kelvin. Pressure: 1.00000 Atm.

Sum of electronic and zero-point Energies = -2023.408437 hartrees

Coordinates:

| Center Number | Atomic Number | Atomic Type | Coordinates (Angstroms) |           |           |
|---------------|---------------|-------------|-------------------------|-----------|-----------|
|               |               |             | X                       | Y         | Z         |
| 1             | 6             | 0           | 1.841340                | 1.194101  | 1.602887  |
| 2             | 6             | 0           | 2.993435                | 0.540705  | 0.897976  |
| 3             | 1             | 0           | 3.941934                | 0.623476  | 1.419958  |
| 4             | 6             | 0           | 2.937790                | -0.082094 | -0.289971 |
| 5             | 6             | 0           | 1.710209                | -0.202411 | -1.156868 |
| 6             | 1             | 0           | 2.031166                | -0.021109 | -2.191053 |
| 7             | 1             | 0           | 1.360915                | -1.243089 | -1.123156 |
| 8             | 16            | 0           | 0.181881                | 0.633923  | 0.990259  |
| 9             | 6             | 0           | 0.572361                | 0.764629  | -0.816077 |
| 10            | 8             | 0           | 4.003276                | -0.692786 | -0.882459 |
| 11            | 14            | 0           | 5.508038                | -1.214633 | -0.272192 |
| 12            | 6             | 0           | 5.237361                | -2.302641 | 1.238919  |
| 13            | 1             | 0           | 4.743926                | -1.765374 | 2.053887  |
| 14            | 1             | 0           | 4.621856                | -3.172850 | 0.987934  |
| 15            | 1             | 0           | 6.199014                | -2.670756 | 1.613877  |
| 16            | 6             | 0           | 6.222769                | -2.201464 | -1.699847 |
| 17            | 1             | 0           | 6.337575                | -1.579176 | -2.593346 |
| 18            | 1             | 0           | 7.210388                | -2.597442 | -1.438914 |
| 19            | 1             | 0           | 5.578967                | -3.048476 | -1.957853 |
| 20            | 6             | 0           | 6.609730                | 0.262056  | 0.118010  |
| 21            | 1             | 0           | 6.693134                | 0.926280  | -0.748743 |
| 22            | 1             | 0           | 6.244846                | 0.855402  | 0.961669  |
| 23            | 1             | 0           | 7.618929                | -0.084660 | 0.368846  |
| 24            | 8             | 0           | 2.020728                | 2.599830  | 1.521052  |
| 25            | 1             | 0           | 1.831391                | 0.888505  | 2.659570  |
| 26            | 6             | 0           | 1.297554                | 3.338115  | 2.497967  |
| 27            | 1             | 0           | 1.578127                | 3.034684  | 3.516998  |
| 28            | 1             | 0           | 1.554799                | 4.389610  | 2.354905  |
| 29            | 1             | 0           | 0.214042                | 3.212475  | 2.379163  |
| 30            | 6             | 0           | -0.649330               | 0.569200  | -1.749599 |

|    |    |   |           |           |           |
|----|----|---|-----------|-----------|-----------|
| 31 | 1  | 0 | -0.194214 | 0.458357  | -2.742505 |
| 32 | 6  | 0 | -1.579597 | 1.795055  | -1.849643 |
| 33 | 1  | 0 | -0.981326 | 2.697699  | -2.013736 |
| 34 | 1  | 0 | -2.217219 | 1.667120  | -2.732870 |
| 35 | 1  | 0 | 0.939386  | 1.787545  | -0.954758 |
| 36 | 6  | 0 | -1.472518 | -0.712262 | -1.489343 |
| 37 | 6  | 0 | -2.667541 | -0.515939 | -0.590000 |
| 38 | 6  | 0 | -3.140481 | 0.683724  | -0.219919 |
| 39 | 6  | 0 | -2.526887 | 1.983758  | -0.655273 |
| 40 | 1  | 0 | -1.981998 | 2.438109  | 0.188670  |
| 41 | 1  | 0 | -0.850767 | -1.502773 | -1.054397 |
| 42 | 8  | 0 | -3.617351 | 2.860740  | -0.994140 |
| 43 | 8  | 0 | -3.202728 | -1.717914 | -0.220792 |
| 44 | 14 | 0 | -4.667819 | -2.119130 | 0.546906  |
| 45 | 6  | 0 | -3.267152 | 4.233629  | -1.016807 |
| 46 | 1  | 0 | -4.190836 | 4.797739  | -1.169801 |
| 47 | 1  | 0 | -2.811685 | 4.551980  | -0.066610 |
| 48 | 1  | 0 | -2.571315 | 4.481391  | -1.830572 |
| 49 | 6  | 0 | -6.117540 | -1.417801 | -0.428246 |
| 50 | 1  | 0 | -6.125432 | -1.809962 | -1.450764 |
| 51 | 1  | 0 | -7.063822 | -1.702805 | 0.045442  |
| 52 | 1  | 0 | -6.088452 | -0.325979 | -0.487792 |
| 53 | 6  | 0 | -4.672880 | -3.996321 | 0.499246  |
| 54 | 1  | 0 | -4.645597 | -4.367000 | -0.530555 |
| 55 | 1  | 0 | -3.808158 | -4.408111 | 1.029796  |
| 56 | 1  | 0 | -5.576990 | -4.392582 | 0.974576  |
| 57 | 6  | 0 | -4.668874 | -1.510024 | 2.329154  |
| 58 | 1  | 0 | -3.791303 | -1.882587 | 2.868093  |
| 59 | 1  | 0 | -4.669901 | -0.418677 | 2.403948  |
| 60 | 1  | 0 | -5.560343 | -1.879849 | 2.848815  |
| 61 | 1  | 0 | -3.998316 | 0.766933  | 0.440069  |
| 62 | 1  | 0 | -1.835776 | -1.117158 | -2.443616 |

---

TS2-VIII

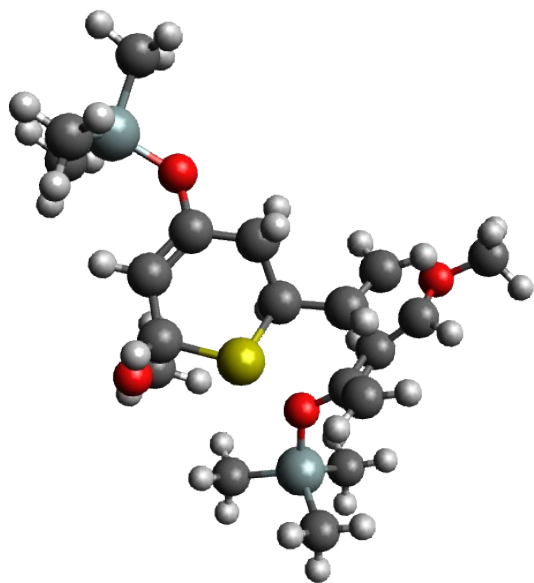

HF = -2023.8354093 hartrees  
 Imaginary Frequencies: 1 (-529.8103 1/cm)  
 Zero-point correction = 0.515966 (Hartree/Particle)  
 Temperature: 298.150 Kelvin. Pressure: 1.00000 Atm.  
 Sum of electronic and zero-point Energies = -2023.319444 hartrees

Coordinates:

| Center Number | Atomic Number | Atomic Type | Coordinates (Angstroms) |           |           |
|---------------|---------------|-------------|-------------------------|-----------|-----------|
|               |               |             | X                       | Y         | Z         |
| 1             | 6             | 0           | -1.638725               | -1.995424 | 1.207717  |
| 2             | 6             | 0           | -2.702439               | -1.217406 | 0.487007  |
| 3             | 1             | 0           | -3.494017               | -1.847239 | 0.090203  |
| 4             | 6             | 0           | -2.772597               | 0.114467  | 0.332301  |
| 5             | 6             | 0           | -1.733373               | 1.105111  | 0.793589  |
| 6             | 1             | 0           | -1.732024               | 1.930710  | 0.074194  |
| 7             | 1             | 0           | -2.045706               | 1.534749  | 1.754932  |
| 8             | 16            | 0           | -0.324605               | -0.949978 | 1.999643  |
| 9             | 6             | 0           | -0.305340               | 0.550715  | 0.915483  |
| 10            | 8             | 0           | -3.816331               | 0.756363  | -0.267189 |
| 11            | 14            | 0           | -5.384720               | 0.245387  | -0.701064 |
| 12            | 6             | 0           | -6.257917               | -0.484422 | 0.797614  |
| 13            | 1             | 0           | -5.759189               | -1.381254 | 1.176093  |
| 14            | 1             | 0           | -6.306862               | 0.244097  | 1.613700  |
| 15            | 1             | 0           | -7.285487               | -0.759425 | 0.534046  |
| 16            | 6             | 0           | -6.208037               | 1.839713  | -1.252029 |
| 17            | 1             | 0           | -5.674513               | 2.290018  | -2.095426 |
| 18            | 1             | 0           | -7.239249               | 1.651408  | -1.570537 |
| 19            | 1             | 0           | -6.236398               | 2.572785  | -0.439441 |
| 20            | 6             | 0           | -5.307022               | -0.978862 | -2.129927 |
| 21            | 1             | 0           | -4.736702               | -0.564055 | -2.967843 |
| 22            | 1             | 0           | -4.848810               | -1.932259 | -1.850706 |
| 23            | 1             | 0           | -6.319968               | -1.191435 | -2.490954 |
| 24            | 8             | 0           | -1.125988               | -3.065662 | 0.425635  |
| 25            | 1             | 0           | -2.082471               | -2.510525 | 2.066484  |
| 26            | 6             | 0           | -0.460422               | -2.691084 | -0.775966 |
| 27            | 1             | 0           | 0.459423                | -2.131409 | -0.567550 |

|    |    |   |           |           |           |
|----|----|---|-----------|-----------|-----------|
| 28 | 1  | 0 | -0.202558 | -3.621362 | -1.287127 |
| 29 | 1  | 0 | -1.105488 | -2.090321 | -1.429276 |
| 30 | 6  | 0 | 0.639368  | 1.595041  | 1.493301  |
| 31 | 1  | 0 | 0.661113  | 1.642295  | 2.579942  |
| 32 | 6  | 0 | 0.842070  | 2.787675  | 0.797386  |
| 33 | 1  | 0 | 0.407721  | 2.930224  | -0.186149 |
| 34 | 1  | 0 | 1.020169  | 3.698345  | 1.360020  |
| 35 | 1  | 0 | 0.048896  | 0.251463  | -0.076766 |
| 36 | 6  | 0 | 2.613959  | 0.540167  | 1.508748  |
| 37 | 6  | 0 | 2.915484  | 0.456189  | 0.151785  |
| 38 | 6  | 0 | 3.036149  | 1.592079  | -0.659487 |
| 39 | 6  | 0 | 2.900949  | 2.877148  | -0.145953 |
| 40 | 1  | 0 | 3.244222  | 3.121204  | 0.854782  |
| 41 | 1  | 0 | 2.990238  | 1.378228  | 2.081333  |
| 42 | 8  | 0 | 2.883523  | 3.916828  | -1.028812 |
| 43 | 8  | 0 | 2.846414  | -0.772388 | -0.487197 |
| 44 | 14 | 0 | 4.172493  | -1.822459 | -0.638004 |
| 45 | 6  | 0 | 3.077156  | 5.209534  | -0.455669 |
| 46 | 1  | 0 | 3.043526  | 5.924225  | -1.278760 |
| 47 | 1  | 0 | 2.284612  | 5.448866  | 0.262415  |
| 48 | 1  | 0 | 4.050538  | 5.278769  | 0.044614  |
| 49 | 6  | 0 | 4.793637  | -2.348680 | 1.060664  |
| 50 | 1  | 0 | 4.010927  | -2.863430 | 1.627615  |
| 51 | 1  | 0 | 5.642197  | -3.035086 | 0.959333  |
| 52 | 1  | 0 | 5.127870  | -1.490246 | 1.652086  |
| 53 | 6  | 0 | 3.496010  | -3.289935 | -1.595258 |
| 54 | 1  | 0 | 2.688130  | -3.783913 | -1.046277 |
| 55 | 1  | 0 | 3.103776  | -2.981177 | -2.569809 |
| 56 | 1  | 0 | 4.283961  | -4.030691 | -1.771138 |
| 57 | 6  | 0 | 5.546237  | -0.963768 | -1.600062 |
| 58 | 1  | 0 | 5.212654  | -0.690261 | -2.606704 |
| 59 | 1  | 0 | 5.879109  | -0.049586 | -1.097827 |
| 60 | 1  | 0 | 6.415075  | -1.623887 | -1.702194 |
| 61 | 1  | 0 | 3.036772  | 1.465998  | -1.738281 |
| 62 | 1  | 0 | 2.471536  | -0.377861 | 2.066673  |

-----

## Product2-VIII

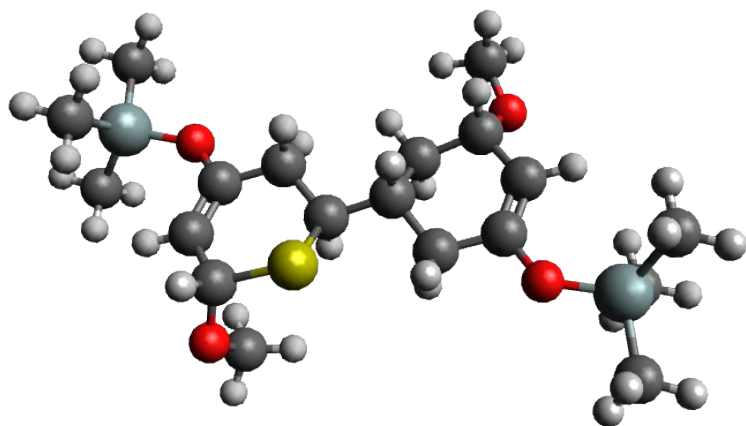

HF = -2023.9324726 hartrees

Imaginary Frequencies: none found

Zero-point correction = 0.521895 (Hartree/Particle)

Temperature: 298.150 Kelvin. Pressure: 1.00000 Atm.

Sum of electronic and zero-point Energies = -2023.410578 hartrees

### Coordinates

| Center Number | Atomic Number | Atomic Type | Coordinates (Angstroms) |           |           |
|---------------|---------------|-------------|-------------------------|-----------|-----------|
|               |               |             | X                       | Y         | Z         |
| 1             | 6             | 0           | 2.476972                | -2.528829 | -0.459730 |
| 2             | 6             | 0           | 3.429291                | -1.412775 | -0.139344 |
| 3             | 1             | 0           | 4.433536                | -1.760844 | 0.086451  |
| 4             | 6             | 0           | 3.173409                | -0.094619 | -0.153649 |
| 5             | 6             | 0           | 1.825192                | 0.539562  | -0.390741 |
| 6             | 1             | 0           | 1.797613                | 1.433903  | 0.240168  |
| 7             | 1             | 0           | 1.768163                | 0.889631  | -1.430928 |
| 8             | 16            | 0           | 0.789681                | -1.960424 | -0.983153 |
| 9             | 6             | 0           | 0.624056                | -0.351443 | -0.070968 |
| 10            | 8             | 0           | 4.120765                | 0.863188  | 0.056755  |
| 11            | 14            | 0           | 5.825963                | 0.823448  | -0.008692 |
| 12            | 6             | 0           | 6.382559                | 0.079909  | -1.644892 |
| 13            | 1             | 0           | 6.063687                | -0.959864 | -1.760785 |
| 14            | 1             | 0           | 5.983446                | 0.651465  | -2.489351 |
| 15            | 1             | 0           | 7.476046                | 0.103818  | -1.712980 |
| 16            | 6             | 0           | 6.292071                | 2.637817  | 0.105446  |
| 17            | 1             | 0           | 5.926250                | 3.083236  | 1.036314  |
| 18            | 1             | 0           | 7.380737                | 2.758070  | 0.082348  |
| 19            | 1             | 0           | 5.873614                | 3.208124  | -0.730090 |
| 20            | 6             | 0           | 6.519834                | -0.124582 | 1.462822  |
| 21            | 1             | 0           | 6.124709                | 0.271798  | 2.404188  |
| 22            | 1             | 0           | 6.293074                | -1.194307 | 1.426686  |
| 23            | 1             | 0           | 7.610528                | -0.018547 | 1.490102  |
| 24            | 8             | 0           | 2.461518                | -3.540996 | 0.537247  |
| 25            | 1             | 0           | 2.830582                | -3.064606 | -1.346968 |
| 26            | 6             | 0           | 2.005405                | -3.141889 | 1.823565  |
| 27            | 1             | 0           | 0.939248                | -2.881626 | 1.805508  |
| 28            | 1             | 0           | 2.147097                | -4.000951 | 2.482608  |
| 29            | 1             | 0           | 2.574938                | -2.289674 | 2.214194  |
| 30            | 6             | 0           | -0.735588               | 0.288008  | -0.439257 |
| 31            | 1             | 0           | -0.736220               | 0.462895  | -1.525219 |
| 32            | 6             | 0           | -0.951465               | 1.643752  | 0.260292  |

|    |    |   |           |           |           |
|----|----|---|-----------|-----------|-----------|
| 33 | 1  | 0 | -1.038117 | 1.491494  | 1.343964  |
| 34 | 1  | 0 | -0.105465 | 2.313574  | 0.089437  |
| 35 | 1  | 0 | 0.623488  | -0.579383 | 1.001013  |
| 36 | 6  | 0 | -1.916639 | -0.643530 | -0.103417 |
| 37 | 6  | 0 | -3.256986 | 0.042669  | -0.183258 |
| 38 | 6  | 0 | -3.403906 | 1.373709  | -0.253237 |
| 39 | 6  | 0 | -2.240029 | 2.323454  | -0.227368 |
| 40 | 1  | 0 | -2.066847 | 2.731920  | -1.240362 |
| 41 | 1  | 0 | -1.942337 | -1.504350 | -0.779534 |
| 42 | 8  | 0 | -2.617091 | 3.417772  | 0.622802  |
| 43 | 8  | 0 | -4.278848 | -0.863818 | -0.190201 |
| 44 | 14 | 0 | -5.957555 | -0.670183 | 0.022562  |
| 45 | 6  | 0 | -1.836647 | 4.587823  | 0.445376  |
| 46 | 1  | 0 | -2.298347 | 5.374142  | 1.047814  |
| 47 | 1  | 0 | -0.797653 | 4.460542  | 0.779584  |
| 48 | 1  | 0 | -1.823265 | 4.909943  | -0.606983 |
| 49 | 6  | 0 | -6.708497 | 0.230727  | -1.451582 |
| 50 | 1  | 0 | -6.457197 | -0.277926 | -2.388404 |
| 51 | 1  | 0 | -7.801010 | 0.243655  | -1.363436 |
| 52 | 1  | 0 | -6.370363 | 1.268106  | -1.531593 |
| 53 | 6  | 0 | -6.585364 | -2.438111 | 0.095365  |
| 54 | 1  | 0 | -6.349566 | -2.980743 | -0.825907 |
| 55 | 1  | 0 | -6.138061 | -2.983482 | 0.932654  |
| 56 | 1  | 0 | -7.673072 | -2.456630 | 0.225514  |
| 57 | 6  | 0 | -6.297941 | 0.235504  | 1.637134  |
| 58 | 1  | 0 | -5.887233 | -0.317576 | 2.488452  |
| 59 | 1  | 0 | -5.864292 | 1.239623  | 1.648057  |
| 60 | 1  | 0 | -7.378082 | 0.334536  | 1.793414  |
| 61 | 1  | 0 | -4.384518 | 1.829520  | -0.344752 |
| 62 | 1  | 0 | -1.792817 | -1.060517 | 0.906928  |

---

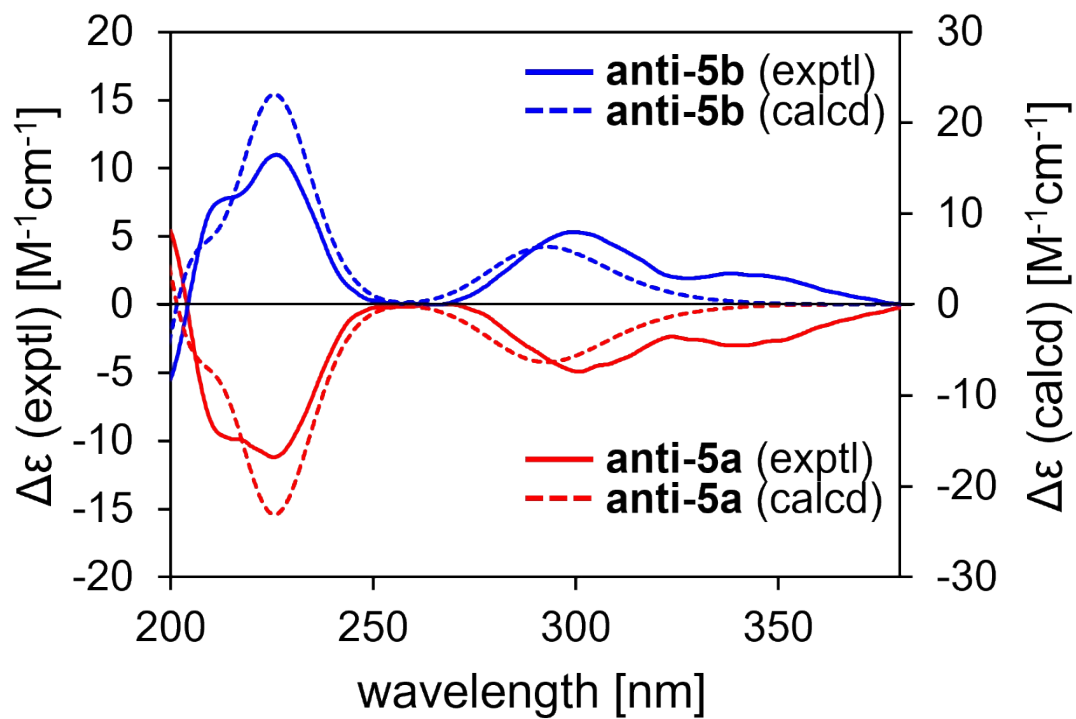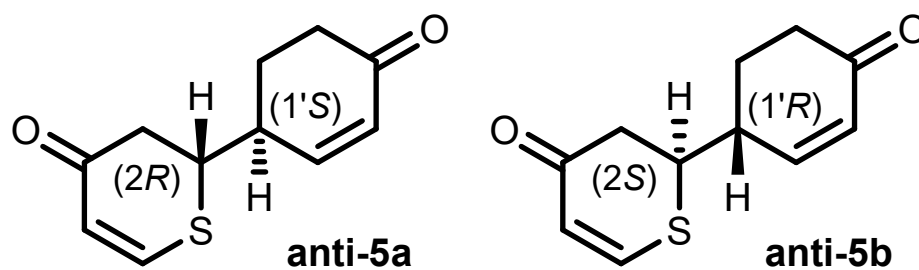

**Figure S10.** The calculated ECD spectra of **anti-5a** (red dash) and **anti-5b** (blue dash) and the measured ECD of **anti-5a** (red) and **anti-5b** (blue).

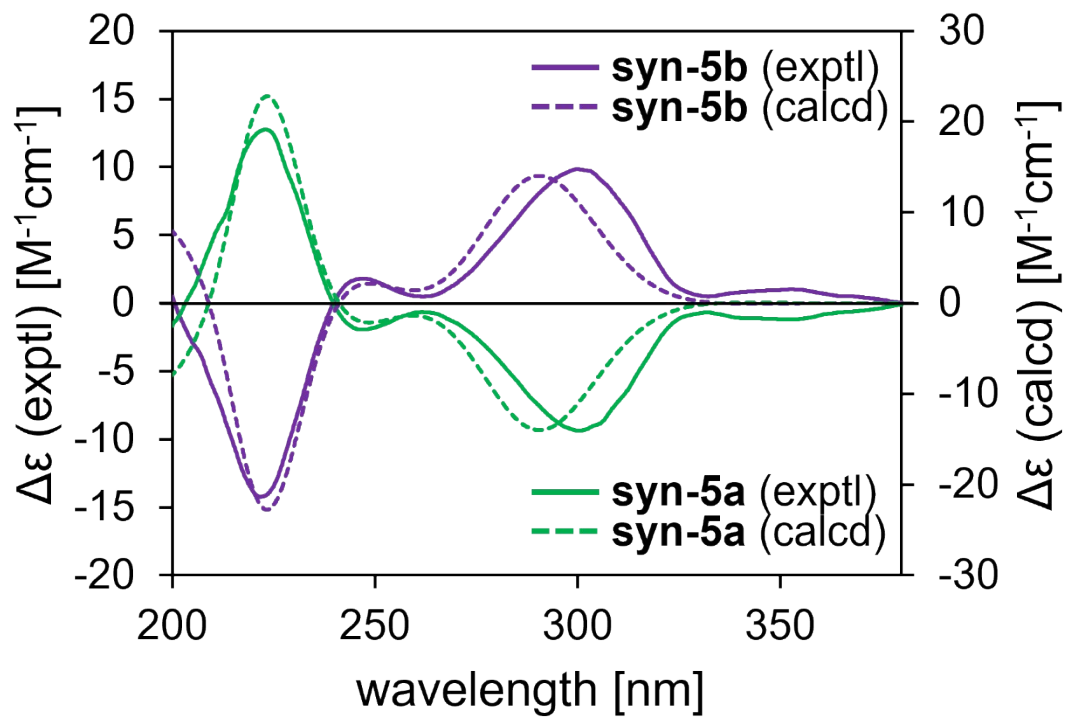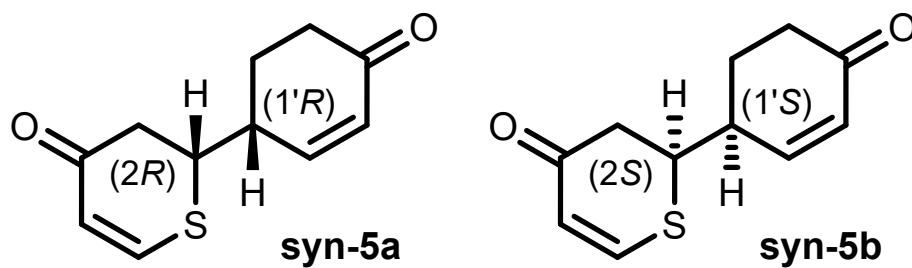

**Figure S11.** The calculated ECD spectra of **syn-5a** (green dash) and **syn-5b** (purple dash) and the measured ECD of **syn-5a** (green) and **syn-5b** (purple).



The DFT-optimized structures of conformers of **5** with their equilibrium population.

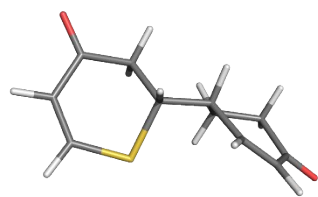

**Conf. 1**  
RE = 0.00 kJ/mol  
(49.41%)

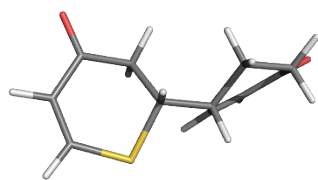

**Conf. 2**  
RE = 1.33 kJ/mol  
(28.85%)

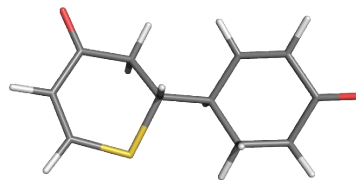

**Conf. 3**  
RE = 4.12 kJ/mol  
(9.38%)

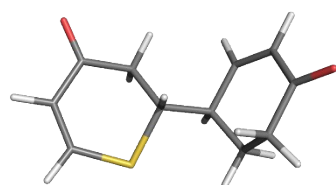

**Conf. 4**  
RE = 6.08 kJ/mol  
(4.25%)

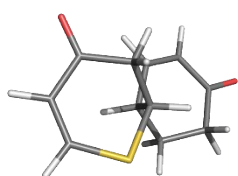

**Conf. 5**  
RE = 6.19 kJ/mol  
(4.07%)

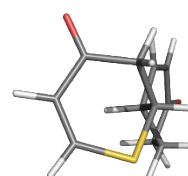

**Conf. 6**  
RE = 7.70 kJ/mol  
(2.21%)

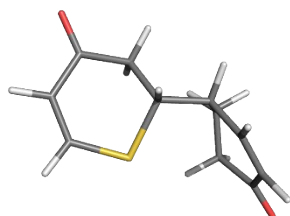

**Conf. 7**  
RE = 9.06 kJ/mol  
(1.28%)

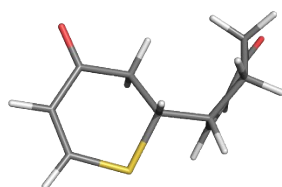

**Conf. 8**  
RE = 11.16 kJ/mol  
(0.55%)

**Figure S12.** Optimized geometries, relative energies (REs), and Boltzmann distributions at 298.15 K of the 8 low-energy conformers of **syn-5a** calculated at the CAM-B3LYP/6-31G(d) level in MeCN.

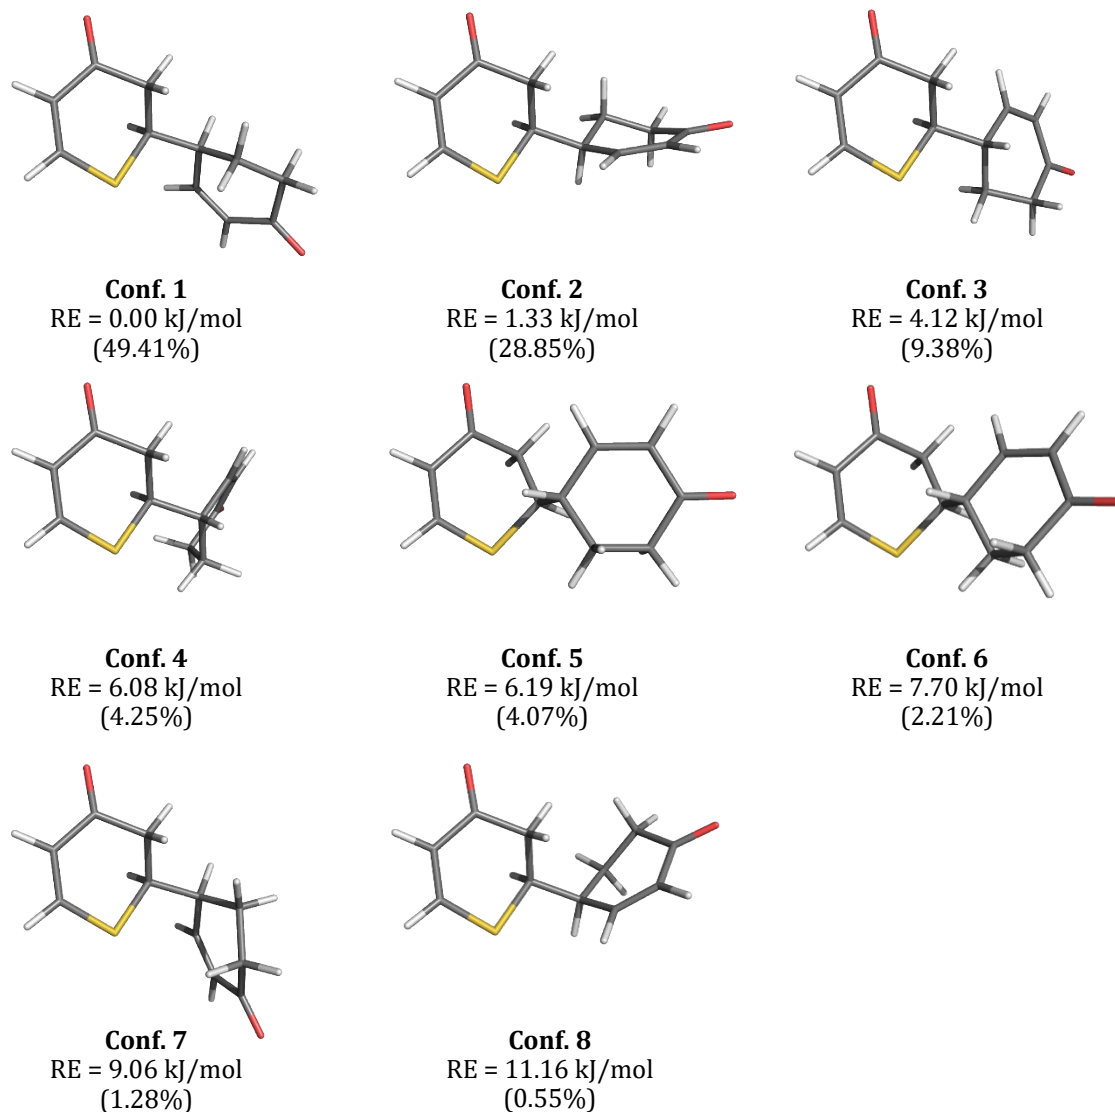

**Figure S13.** Optimized geometries, relative energies (REs), and Boltzmann distributions at 298.15 K of the 8 low-energy conformers of **syn-5b** calculated at the CAM-B3LYP/6-31G(d) level in MeCN.

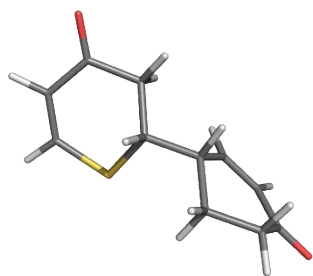

**Conf. 1**  
RE = 0.00 kJ/mol  
(35.12%)

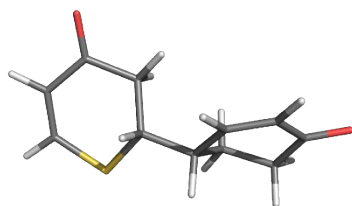

**Conf. 2**  
RE = 0.32 kJ/mol  
(30.90%)

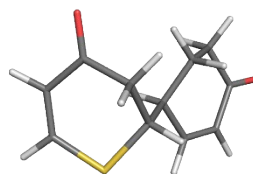

**Conf. 3**  
RE = 1.69 kJ/mol  
(17.74%)

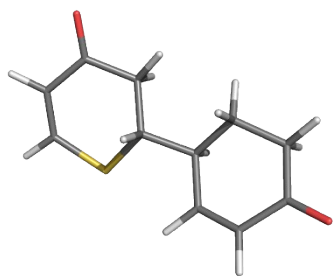

**Conf. 4**  
RE = 3.33 kJ/mol  
(9.15%)

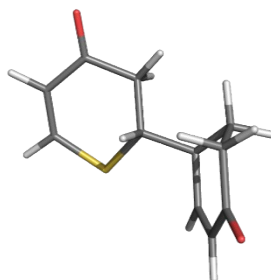

**Conf. 5**  
RE = 6.23 kJ/mol  
(2.84%)

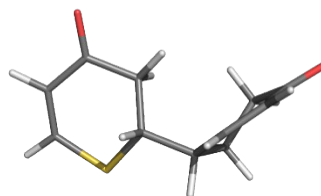

**Conf. 6**  
RE = 7.50 kJ/mol  
(1.71%)

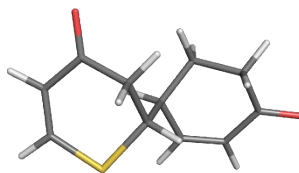

**Conf. 7**  
RE = 7.87 kJ/mol  
(1.47%)

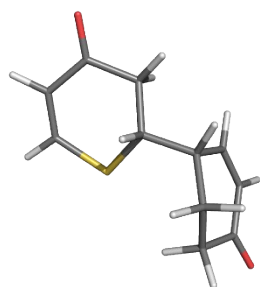

**Conf. 8**  
RE = 9.02 kJ/mol  
(0.92%)

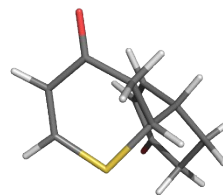

**Conf. 9**  
RE = 13.62 kJ/mol  
(0.14%)

**Figure S14.** Optimized geometries, relative energies (REs), and Boltzmann distributions at 298.15 K of the 9 low-energy conformers of **anti-5a** calculated at the CAM-B3LYP/6-31G(d) level in MeCN.

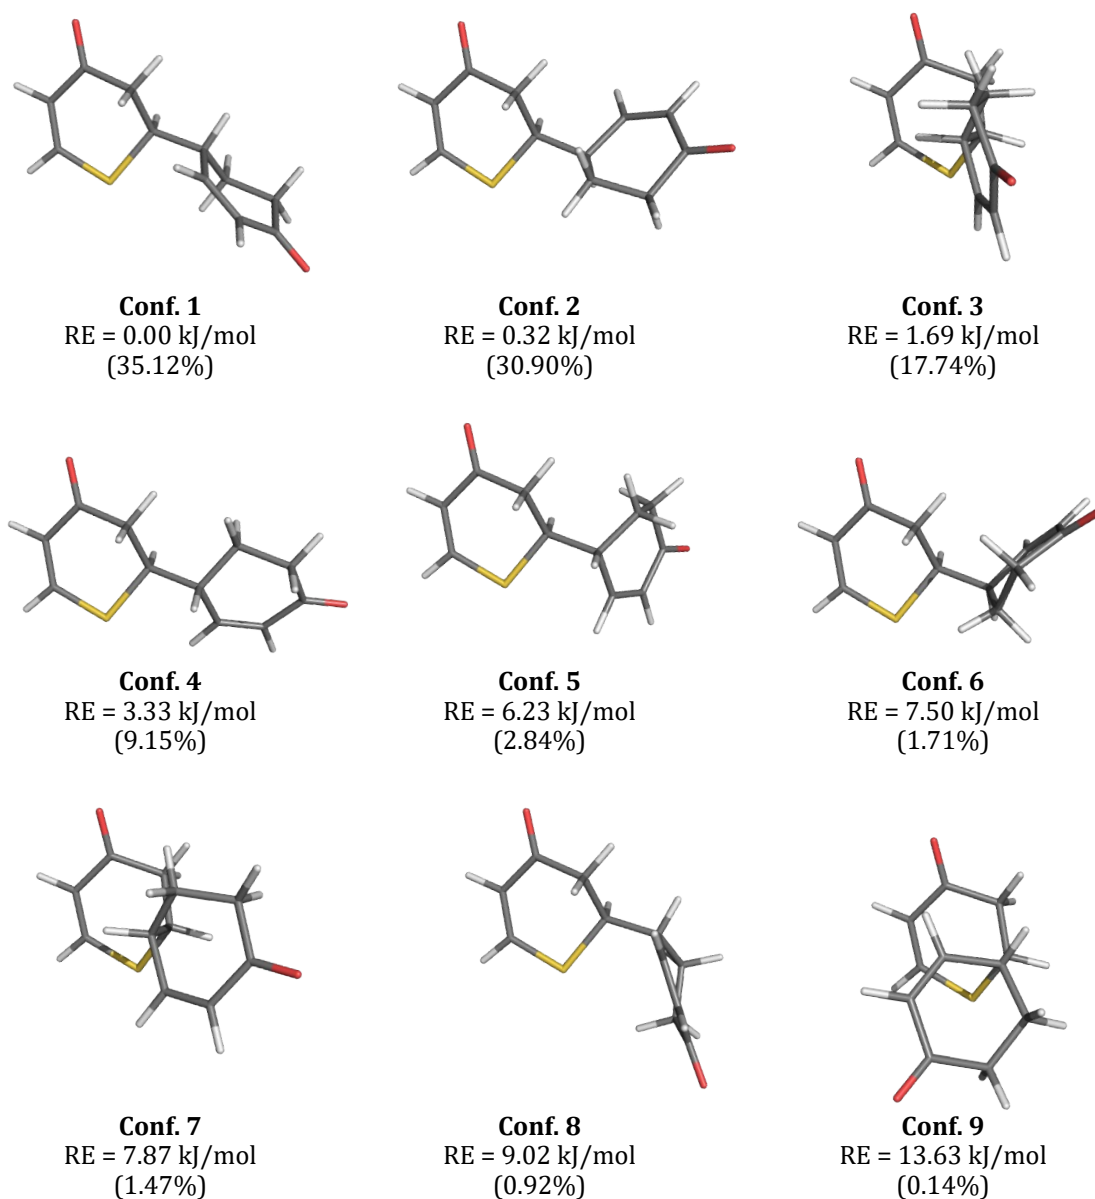

**Figure S15.** Optimized geometries, relative energies (REs), and Boltzmann distributions at 298.15 K of the 9 low-energy conformers of **anti-5b** calculated at the CAM-B3LYP/6-31G(d) level in MeCN.

#### References

- [1] Wavefunction Inc.: Irvine, CA.
- [2] Frisch, M. J.; Trucks, G. W.; Schlegel, H. B.; Scuseria, G. E.; Robb, M. A.; Cheeseman, J. R.; Scalmani, G.; Barone, V.; Petersson, G. A.; Nakatsuji, H.; Li, X.; Caricato, M.; Marenich, A. V.; Bloino, J.; Janesko, B. G.; Gomperts, R.; Mennucci, B.; Hratchian, H. P.; Ortiz, J. V.; Izmaylov, A. F.; Sonnenberg, J. L.; Williams-Young, D.; Ding, F.; Lipparini, F.; Egidi, F.; Goings, J.; Peng, B.; Petrone, A.; Henderson, T.; Ranasinghe, D.; Zakrzewski, V. G.; Gao, J.; Rega, N.; Zheng, G.; Liang, W.; Hada, M.; Ehara, M.; Toyota, K.; Fukuda, R.; Hasegawa, J.; Ishida, M.; Nakajima, T.; Honda, Y.; Kitao, O.; Nakai, H.; Vreven, T.; Throssell, K.; Montgomery, Jr., J. A.; Peralta, J. E.; Ogliaro, F.; Bearpark, M. J.; Heyd, J. J.; Brothers, E. N.; Kudin, K. N.; Staroverov, V. N.; Keith, T. A.; Kobayashi, R.; Normand, J.; Raghavachari, K.; Rendell, A. P.; Burant, J. C.; Iyengar, S. S.; Tomasi, J.; Cossi, M.; Millam, J. M.; Klene, M.; Adamo, C.; Cammi, R.; Ochterski, J. W.; Martin, R. L.; Morokuma, K.; Farkas, O.; Foresman, J. B.; Fox, D. J. *Gaussian 16, Revision A.03*; Gaussian, Inc.: Wallingford, CT, 2016.
- [3] Bruhn, T.; Schaumlöffel, A.; Hemberger, Y.; Pecitelli, G. SpecDis: Quantifying the comparison of calculated and experimental electronic circular dichroism spectra. *Chirality*, 25, 243–249, 2013.

NMR spectroscopic data of synthesized compounds  
 NMR spectroscopic data of **anti-5**

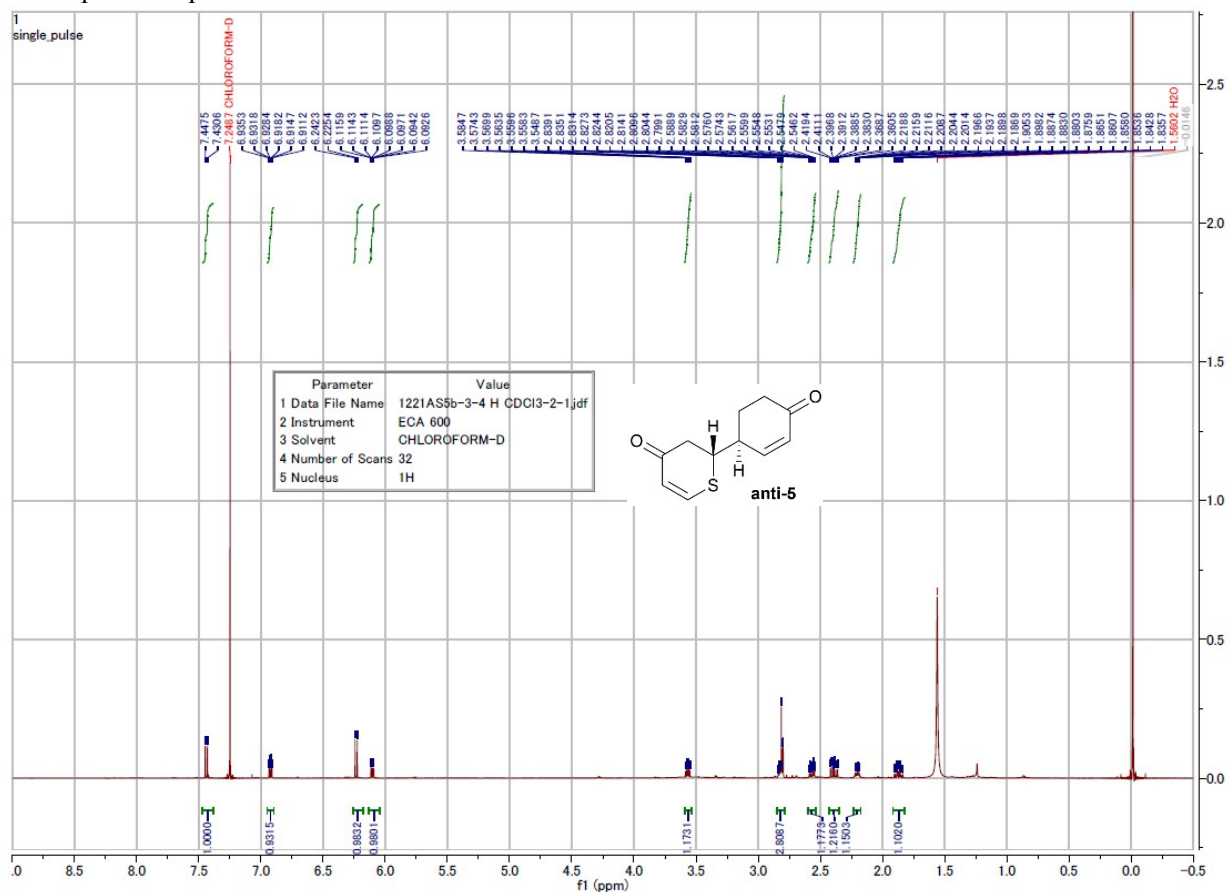

<sup>1</sup>H-NMR (600 MHz) spectroscopic data of **anti-5**. Measured in CDCl<sub>3</sub>.

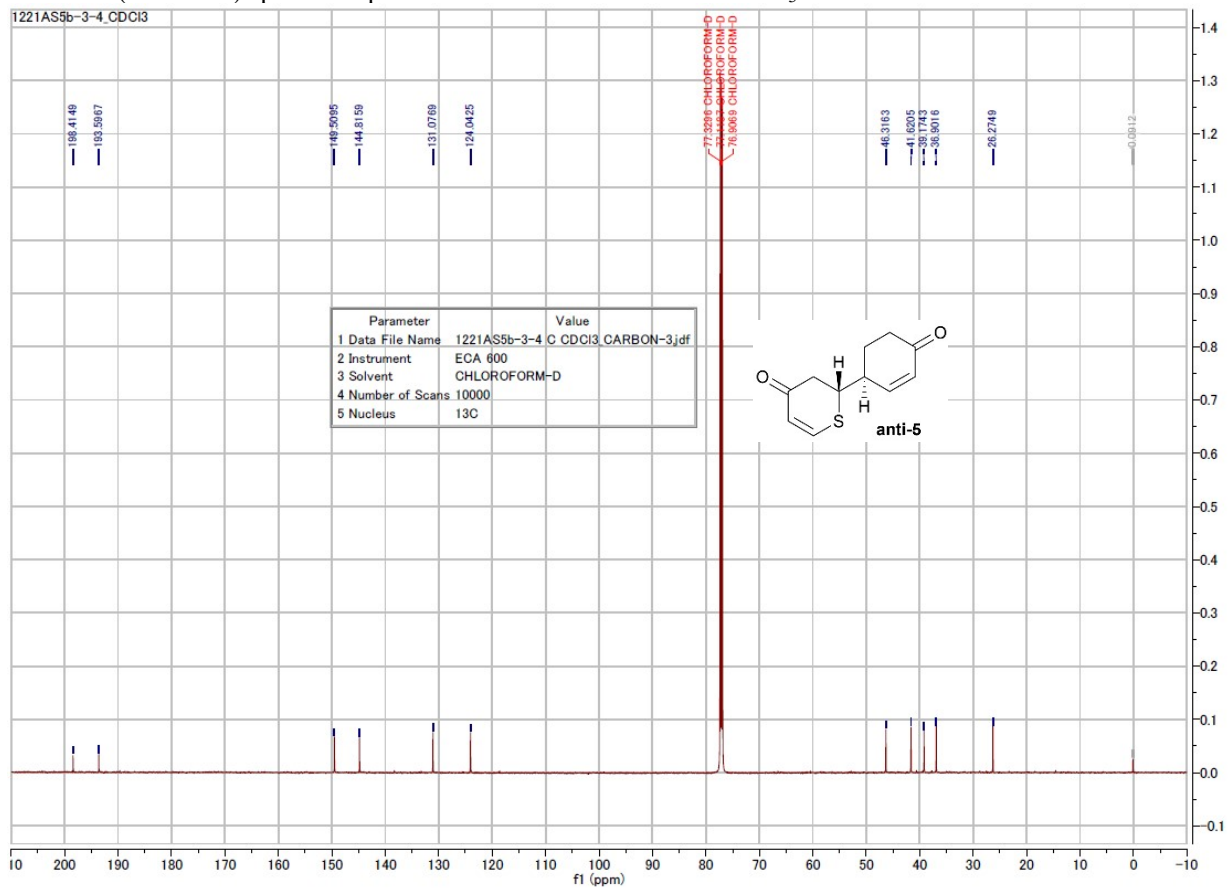

<sup>13</sup>C-NMR (150 MHz) spectroscopic data of **anti-5**. Measured in CDCl<sub>3</sub>.

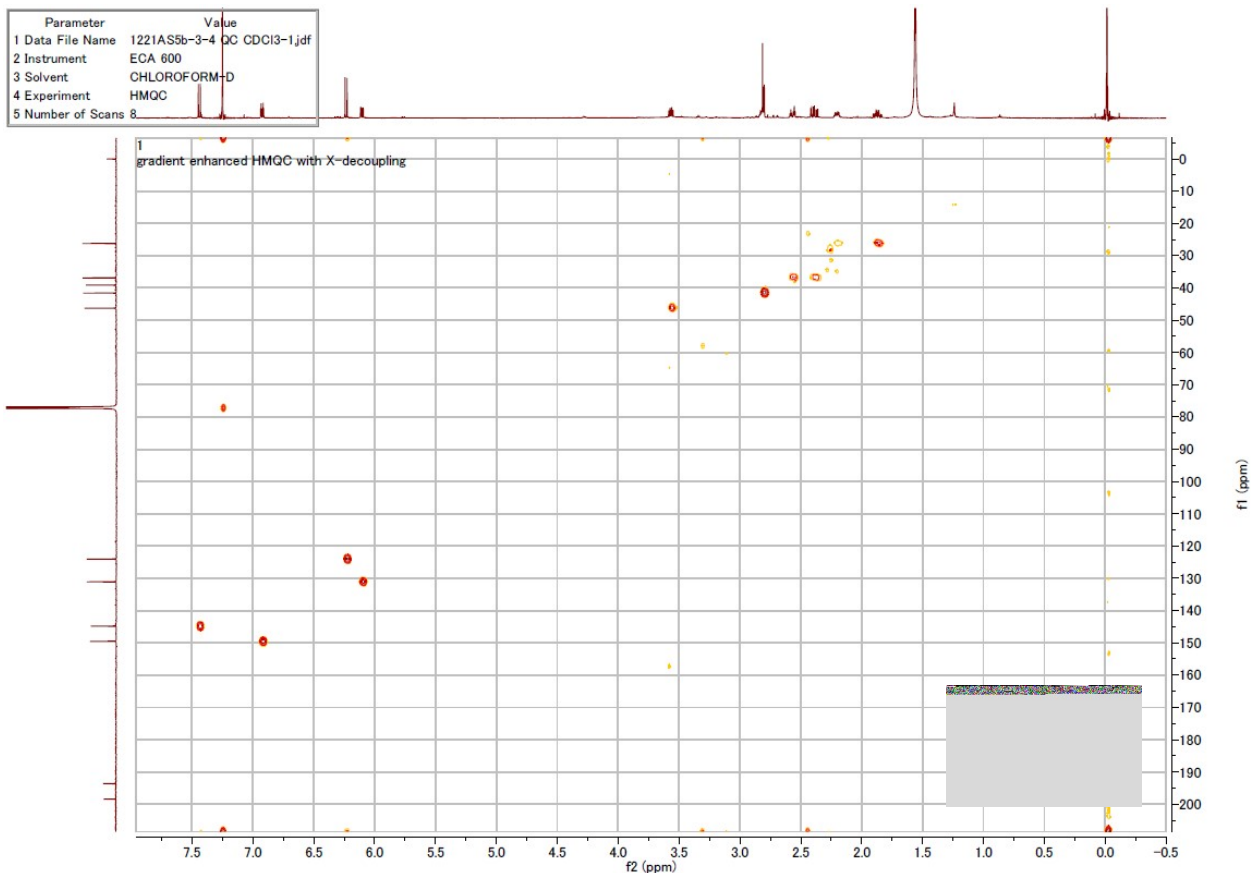

HMQC NMR (600 MHz) spectroscopic data of **anti-5**. Measured in  $\text{CDCl}_3$ .

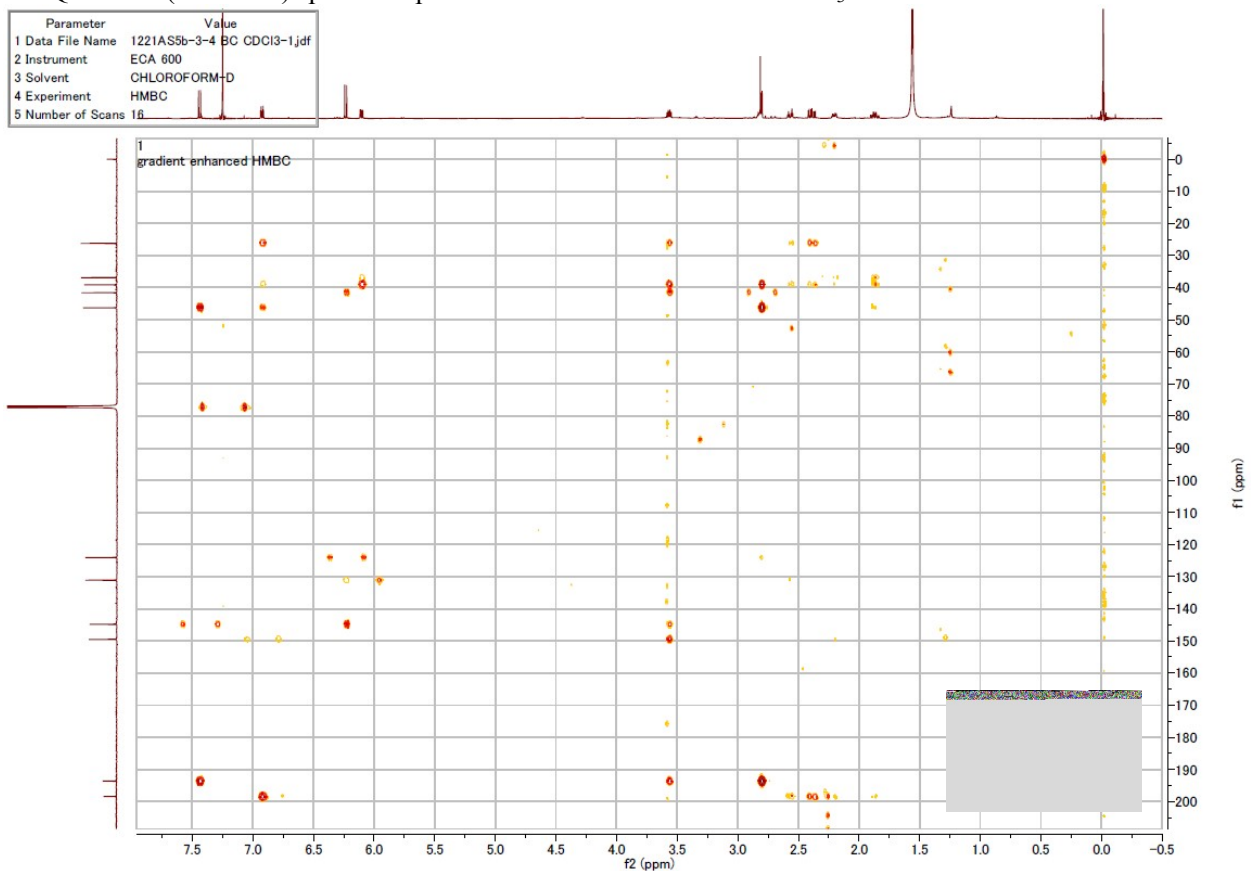

HMBC NMR (600 MHz) spectroscopic data of **anti-5**. Measured in  $\text{CDCl}_3$ .

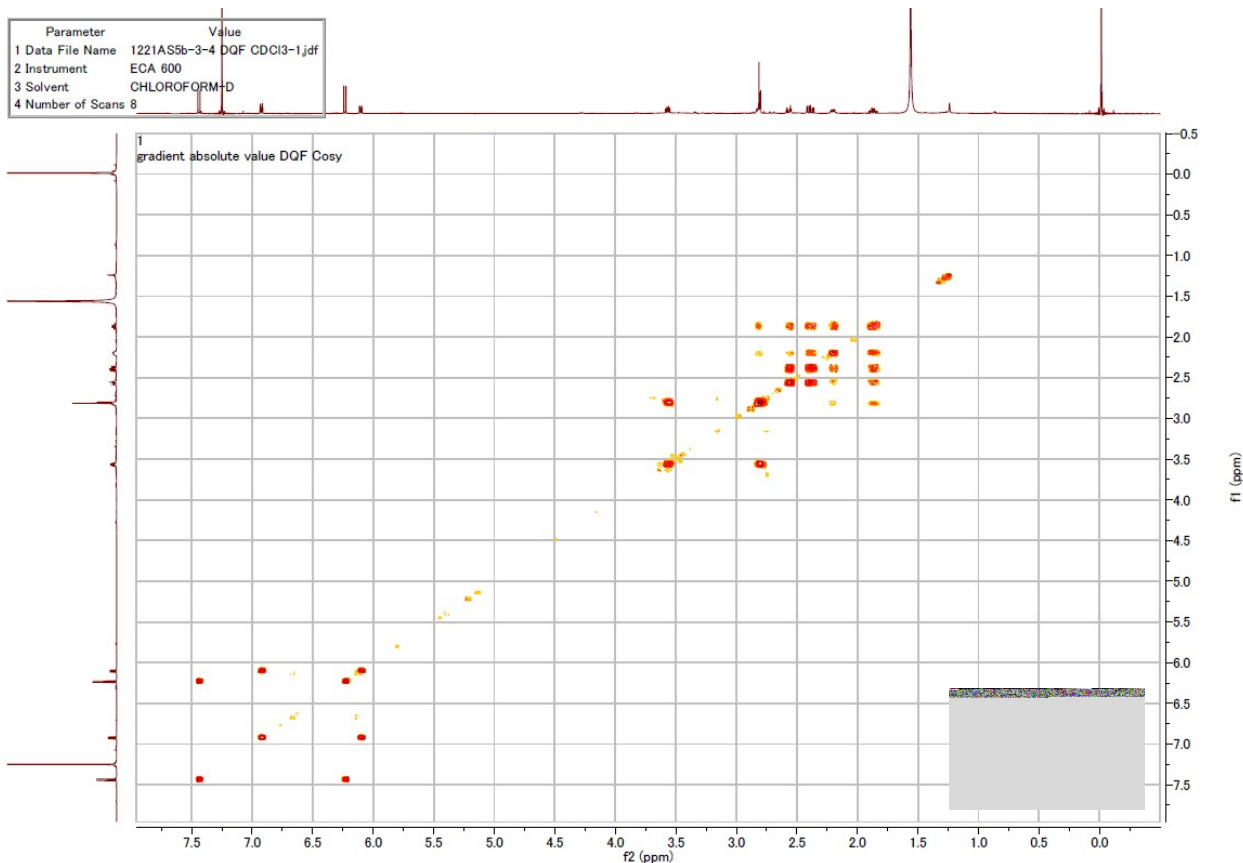

COSY NMR (600 MHz) spectroscopic data of anti-5. Measured in CDCl<sub>3</sub>.

NMR spectroscopic data of syn-5

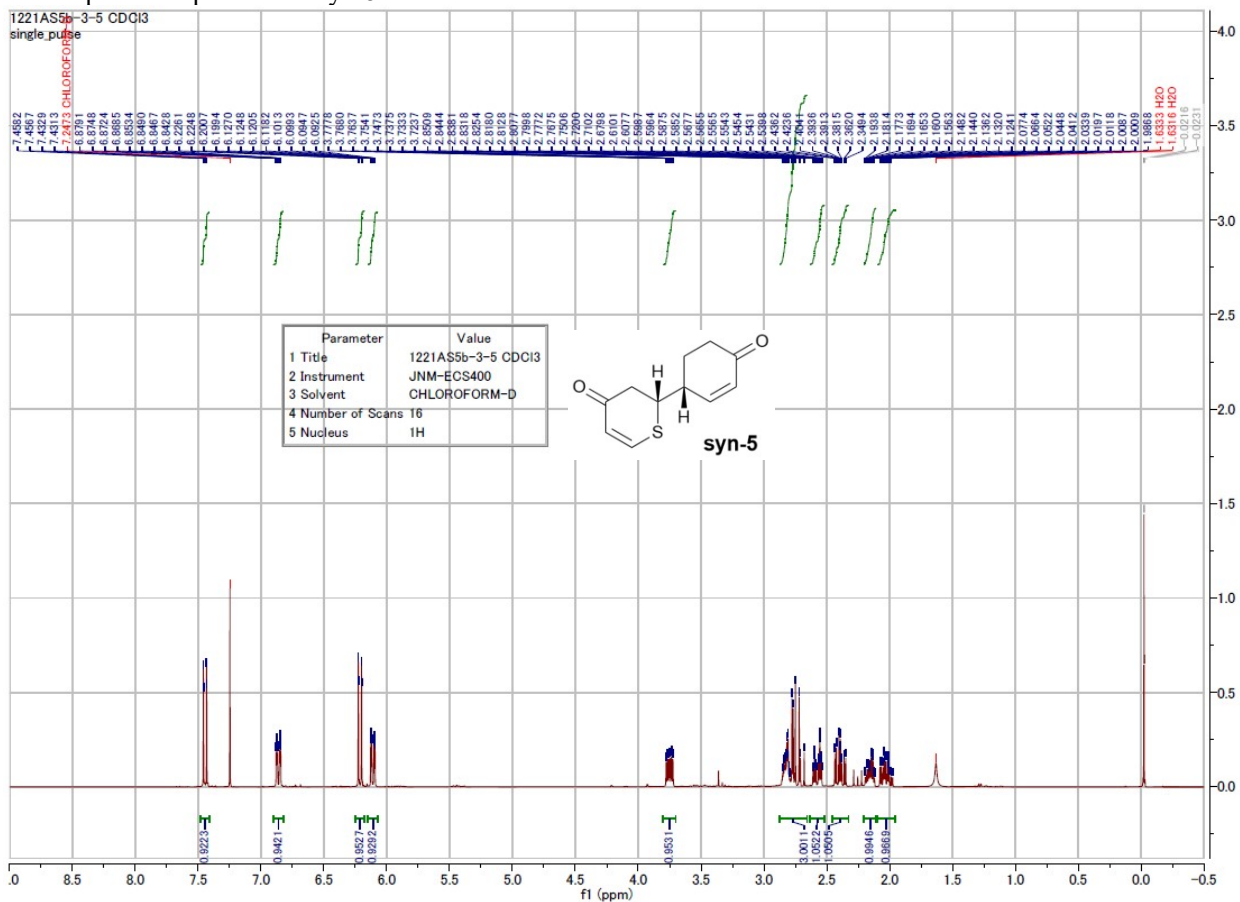

<sup>1</sup>H-NMR (400 MHz) spectroscopic data of syn-5. Measured in CDCl<sub>3</sub>.



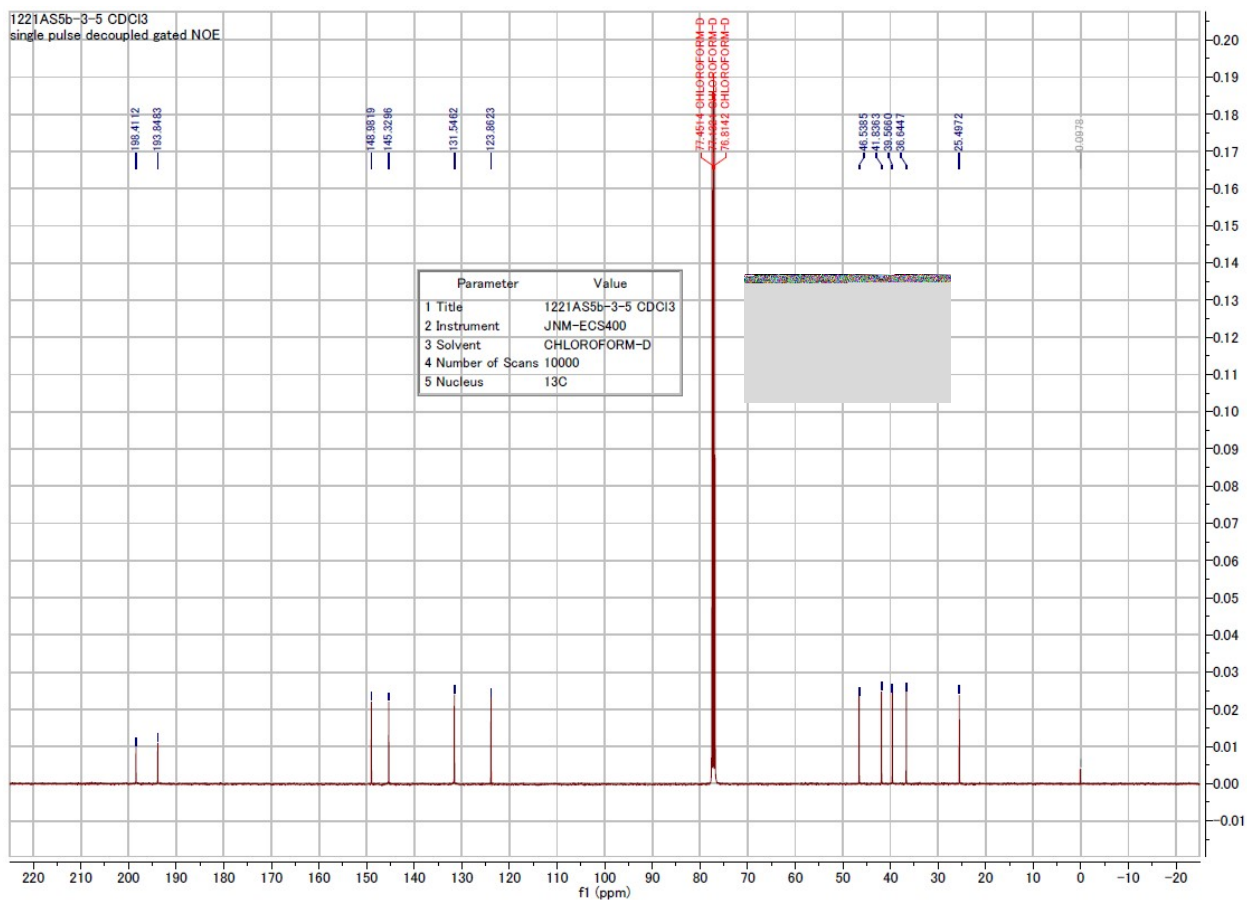

$^{13}\text{C}$ -NMR (100 MHz) spectroscopic data of **syn-5**. Measured in  $\text{CDCl}_3$ .

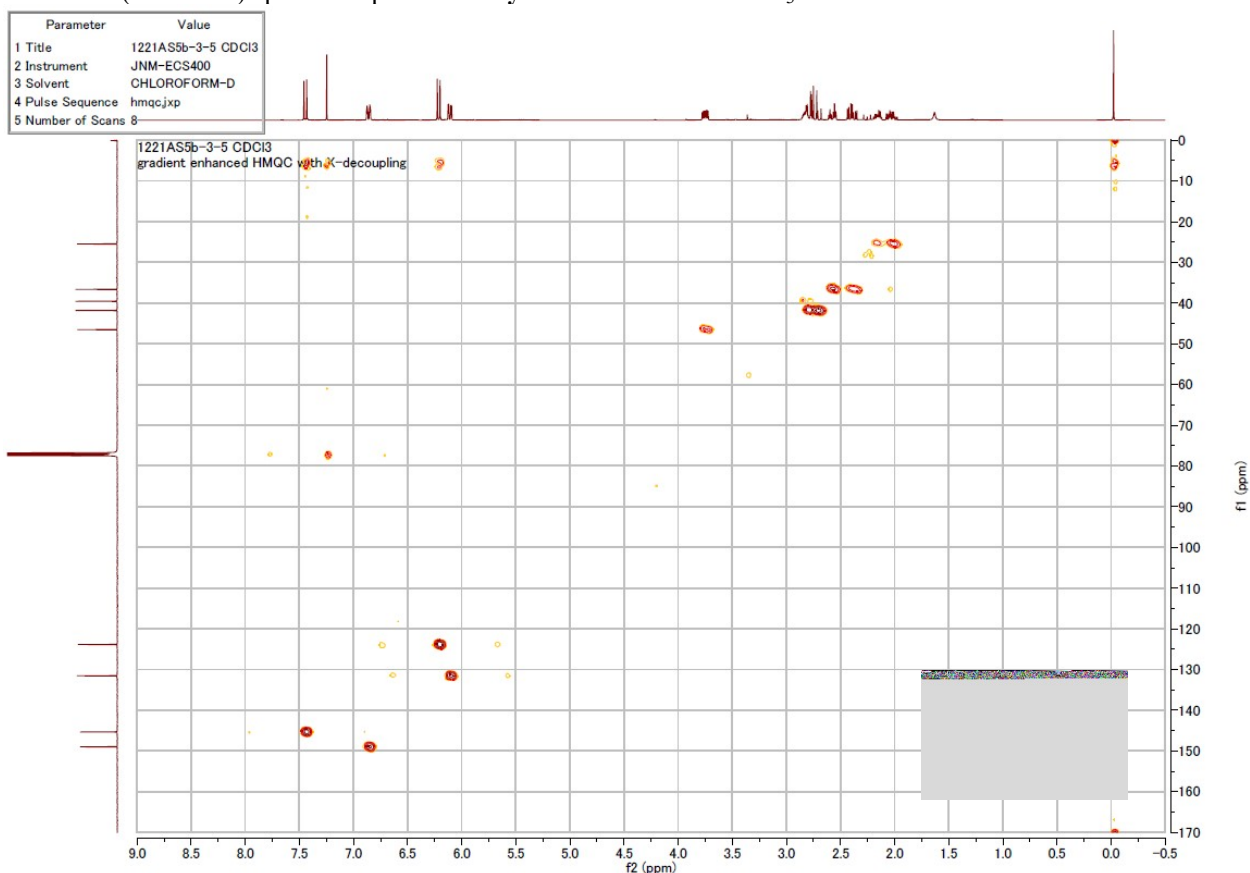

HMQC NMR (400 MHz) spectroscopic data of **syn-5**. Measured in  $\text{CDCl}_3$ .



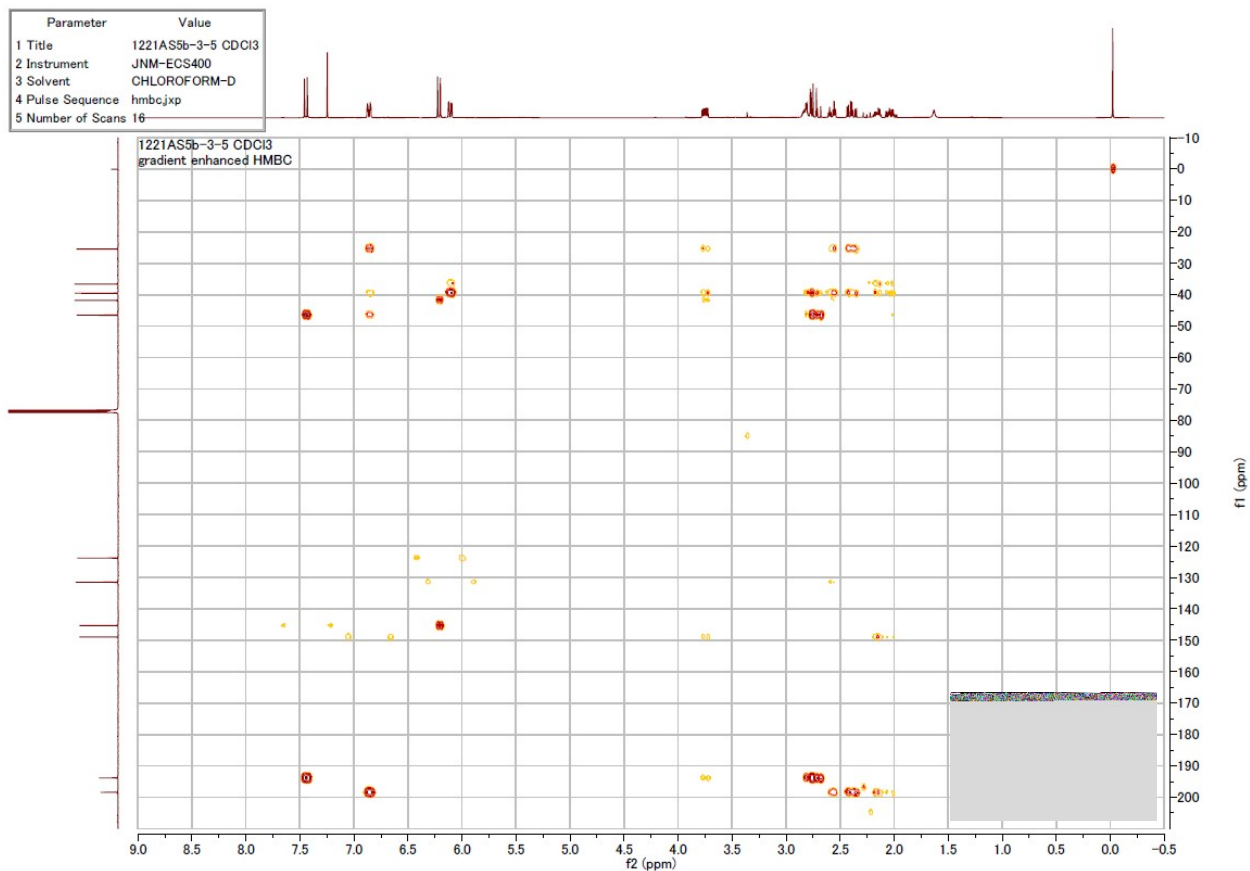

HMBC NMR (400 MHz) spectroscopic data of **syn-5**. Measured in CDCl<sub>3</sub>.

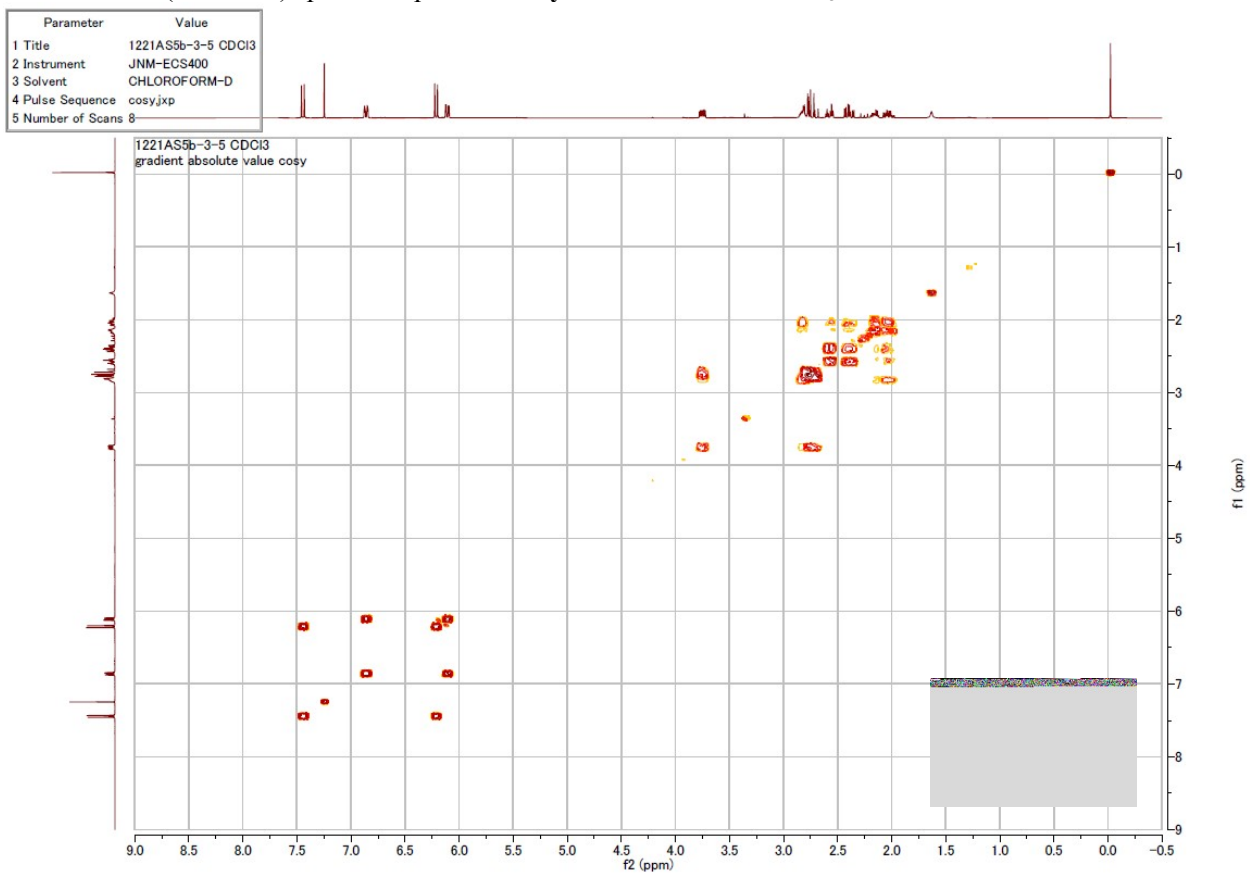

COSY NMR (400 MHz) spectroscopic data of **syn-5**. Measured in CDCl<sub>3</sub>.

# NMR spectroscopic data of 7a

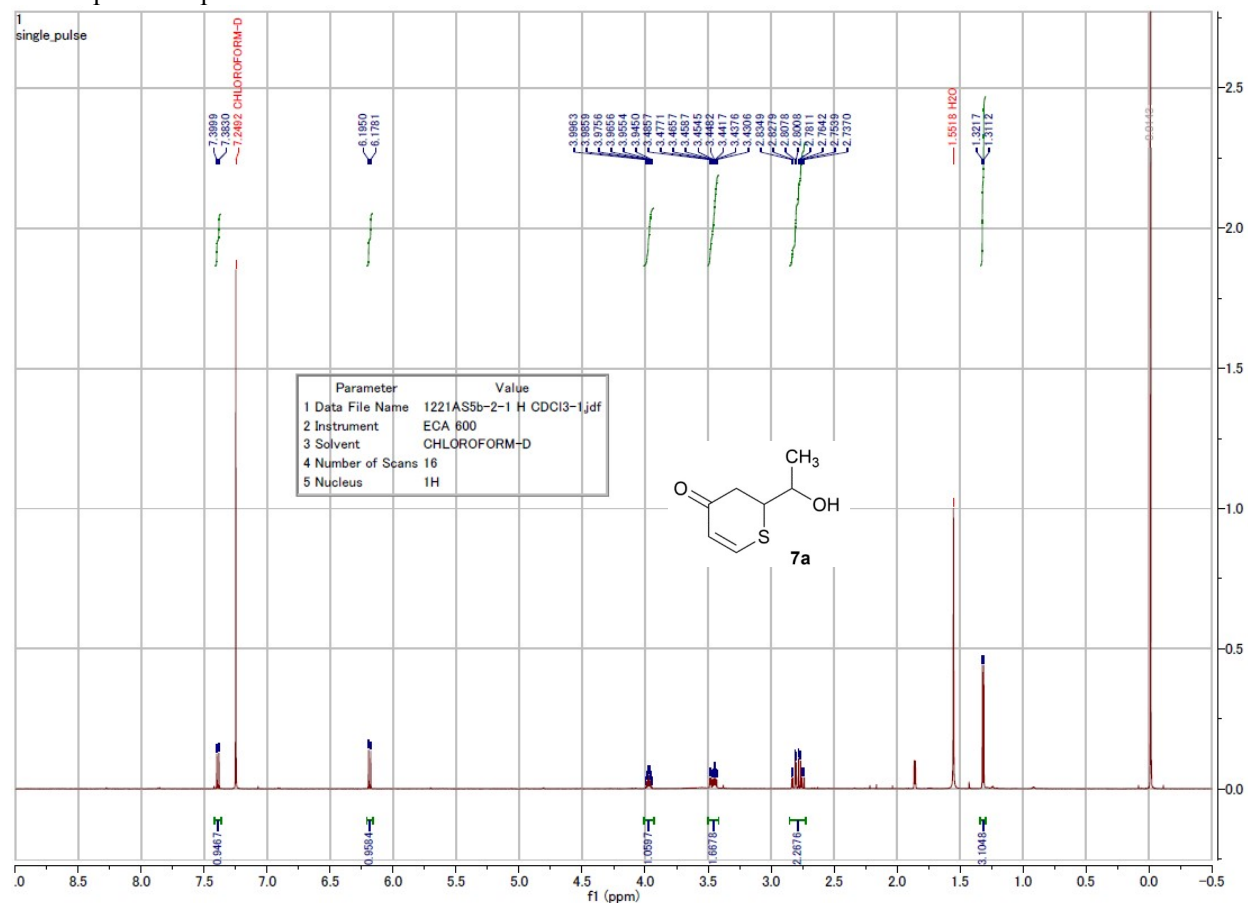

<sup>1</sup>H-NMR (600 MHz) spectroscopic data of 7a. Measured in CDCl<sub>3</sub>.

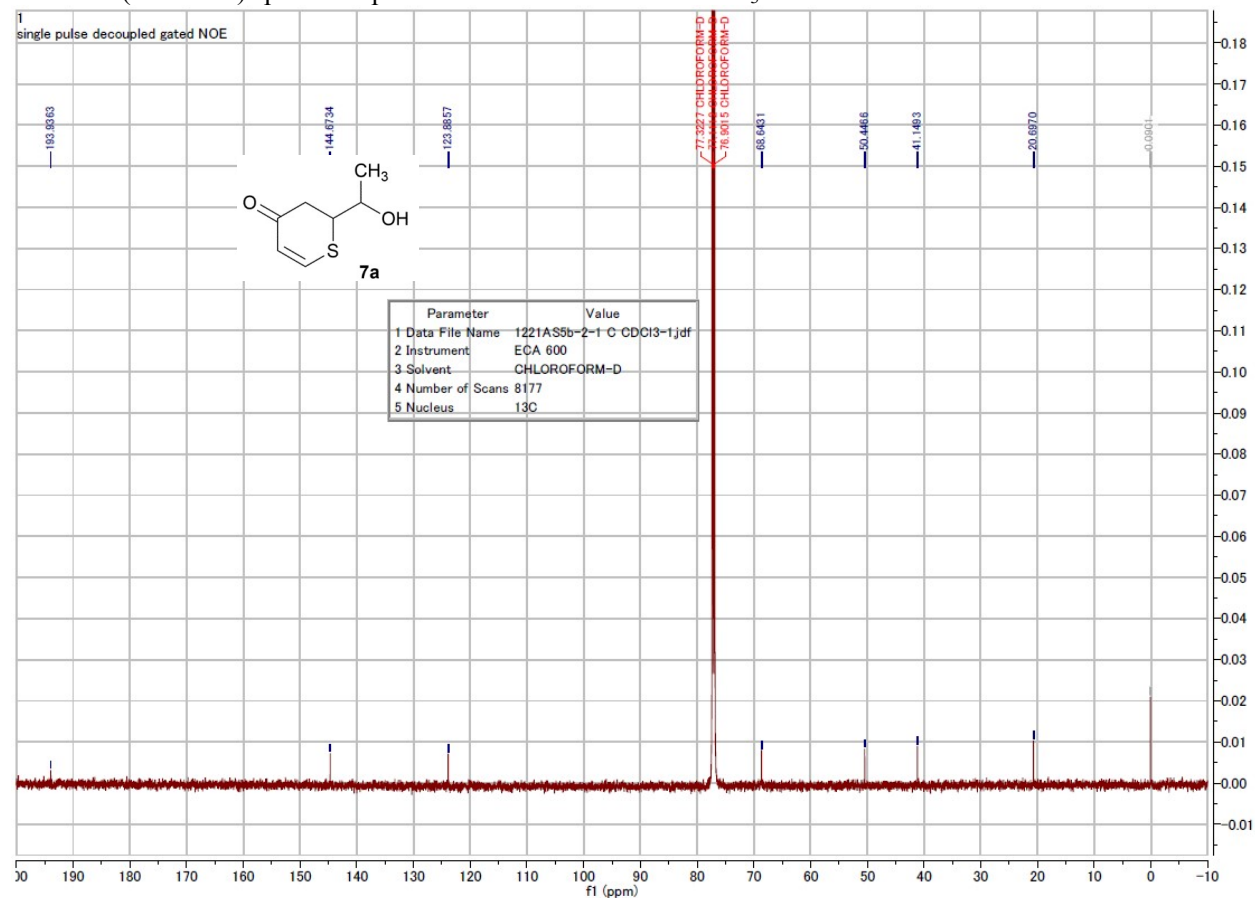

<sup>13</sup>C-NMR (150 MHz) spectroscopic data of 7a. Measured in CDCl<sub>3</sub>.

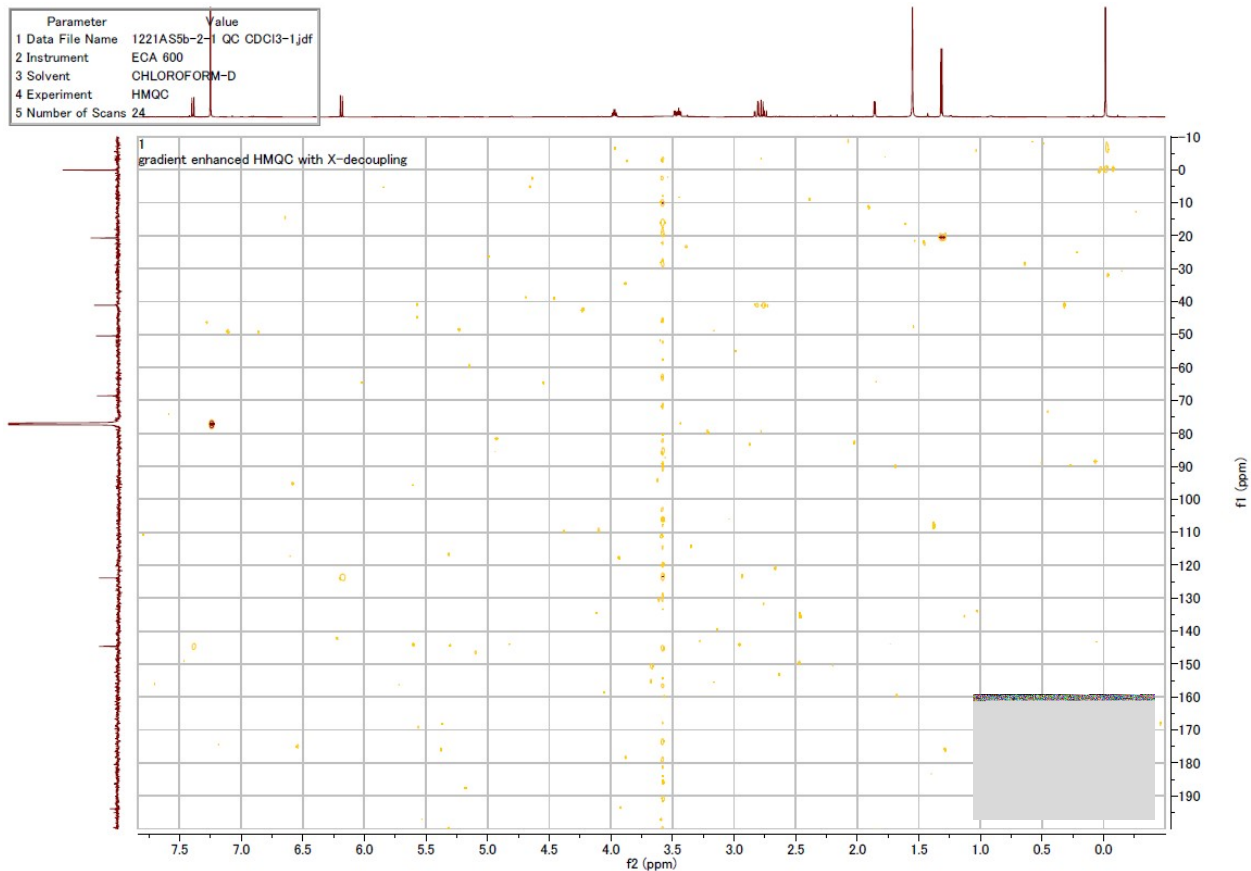

HMQC NMR (600 MHz) spectroscopic data of **7a**. Measured in  $\text{CDCl}_3$ .

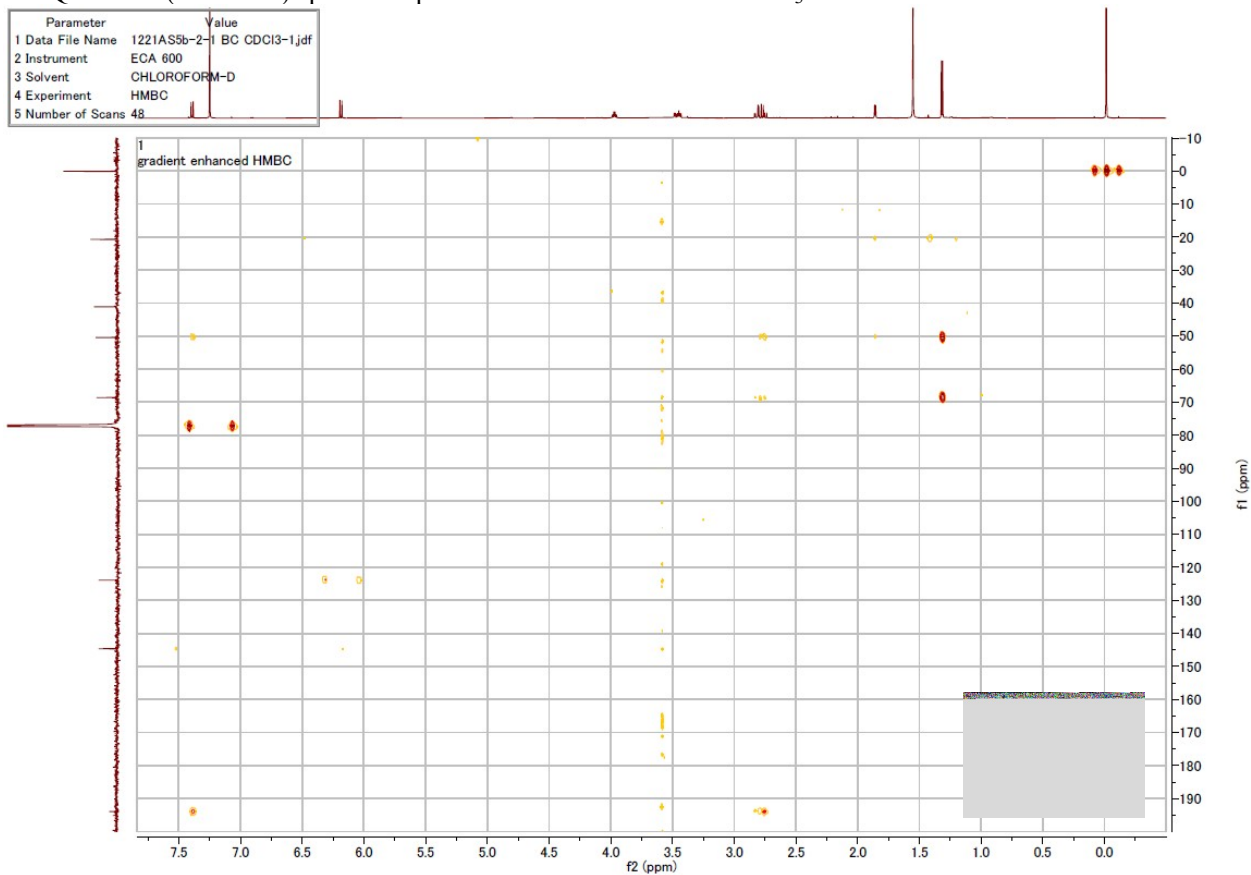

HMBC NMR (600 MHz) spectroscopic data of **7a**. Measured in  $\text{CDCl}_3$ .

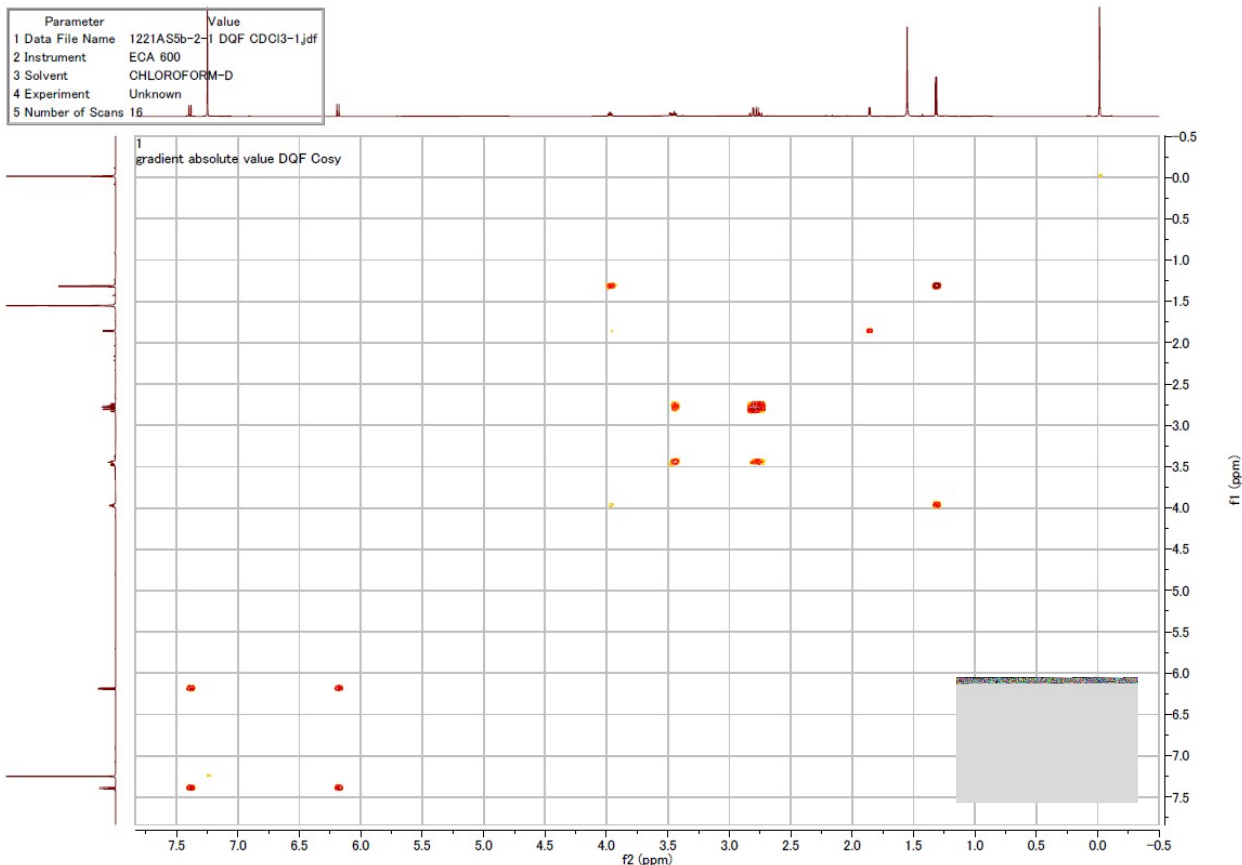

COSY NMR (600 MHz) spectroscopic data of **7a**. Measured in  $\text{CDCl}_3$ .

NMR spectroscopic data of **7b**

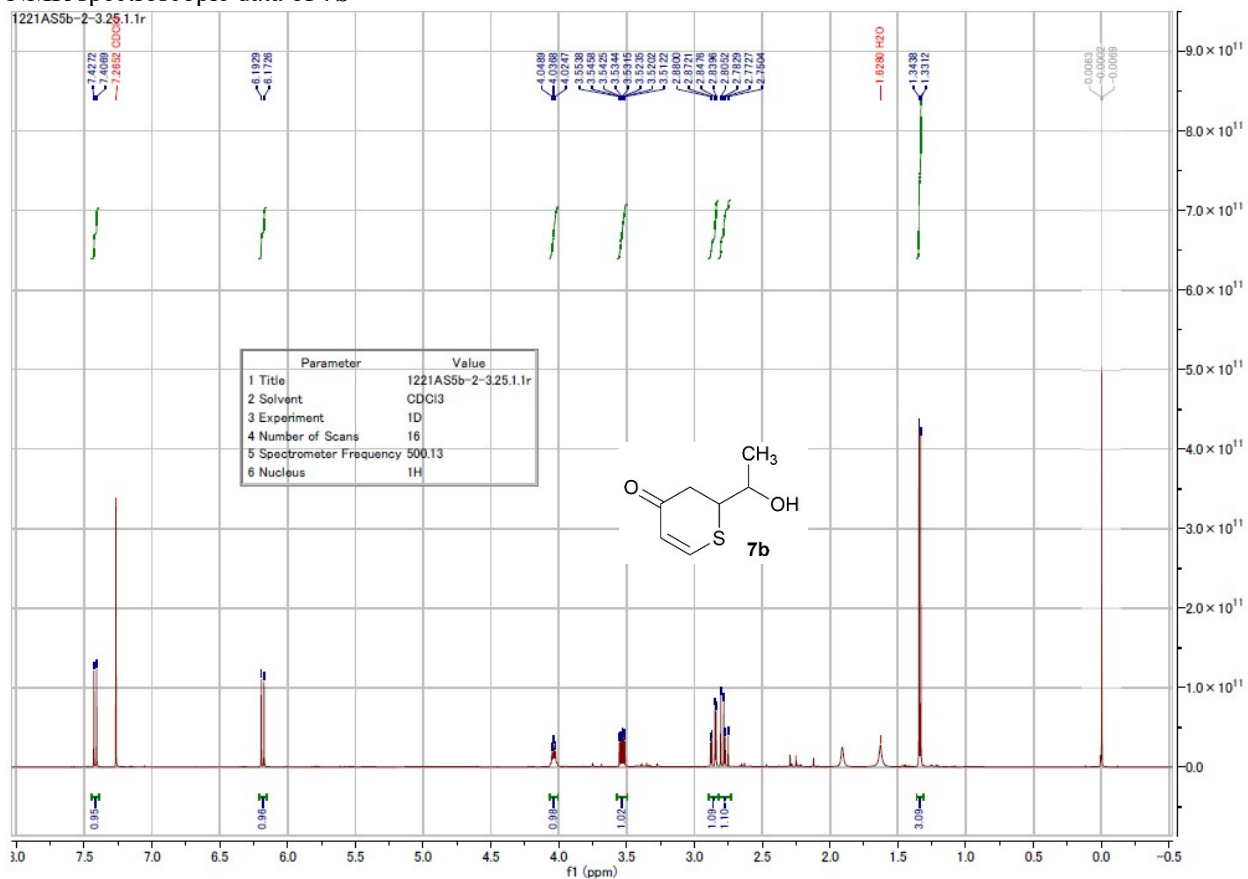

$^1\text{H}$ -NMR (500 MHz) spectroscopic data of **7b**. Measured in  $\text{CDCl}_3$ .

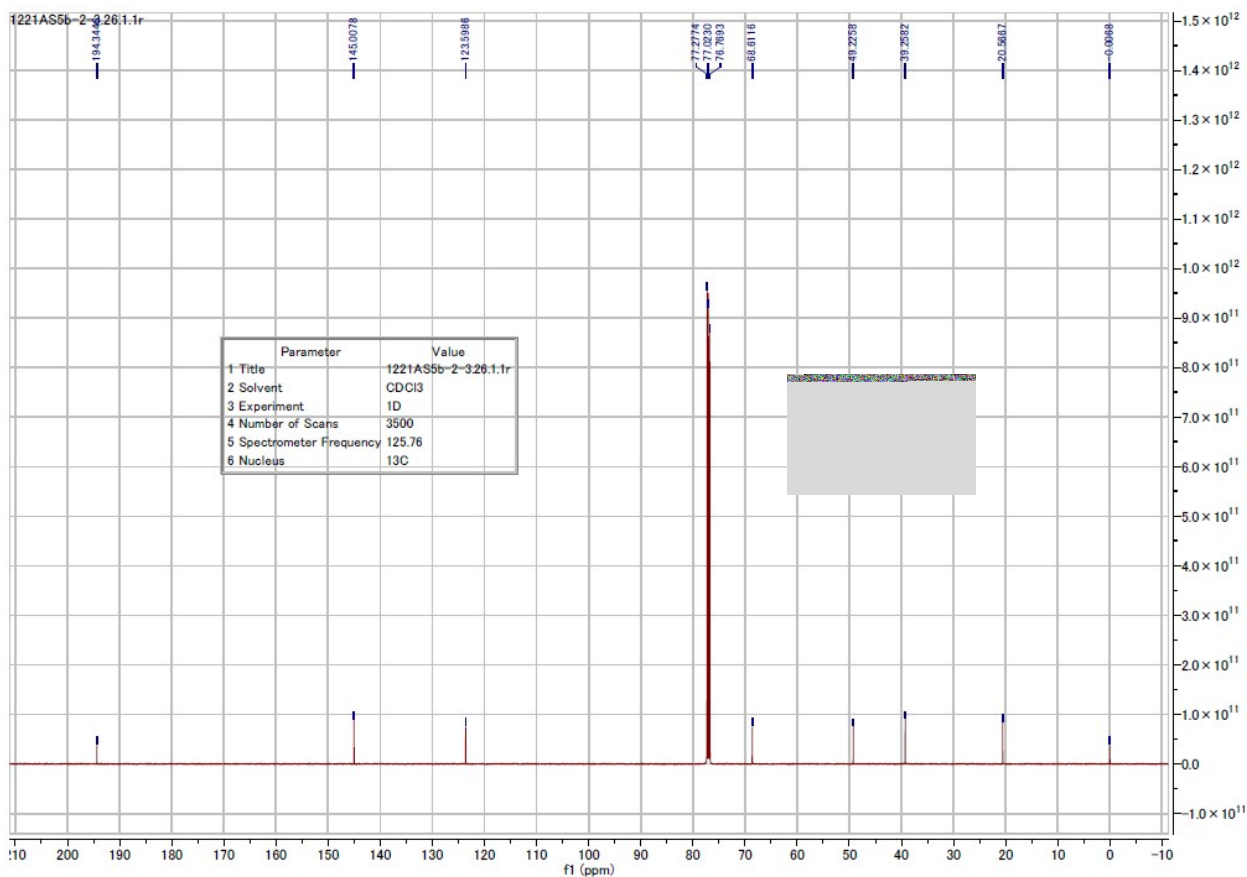

$^{13}\text{C}$ -NMR (125 MHz) spectroscopic data of **7b**. Measured in  $\text{CDCl}_3$ .

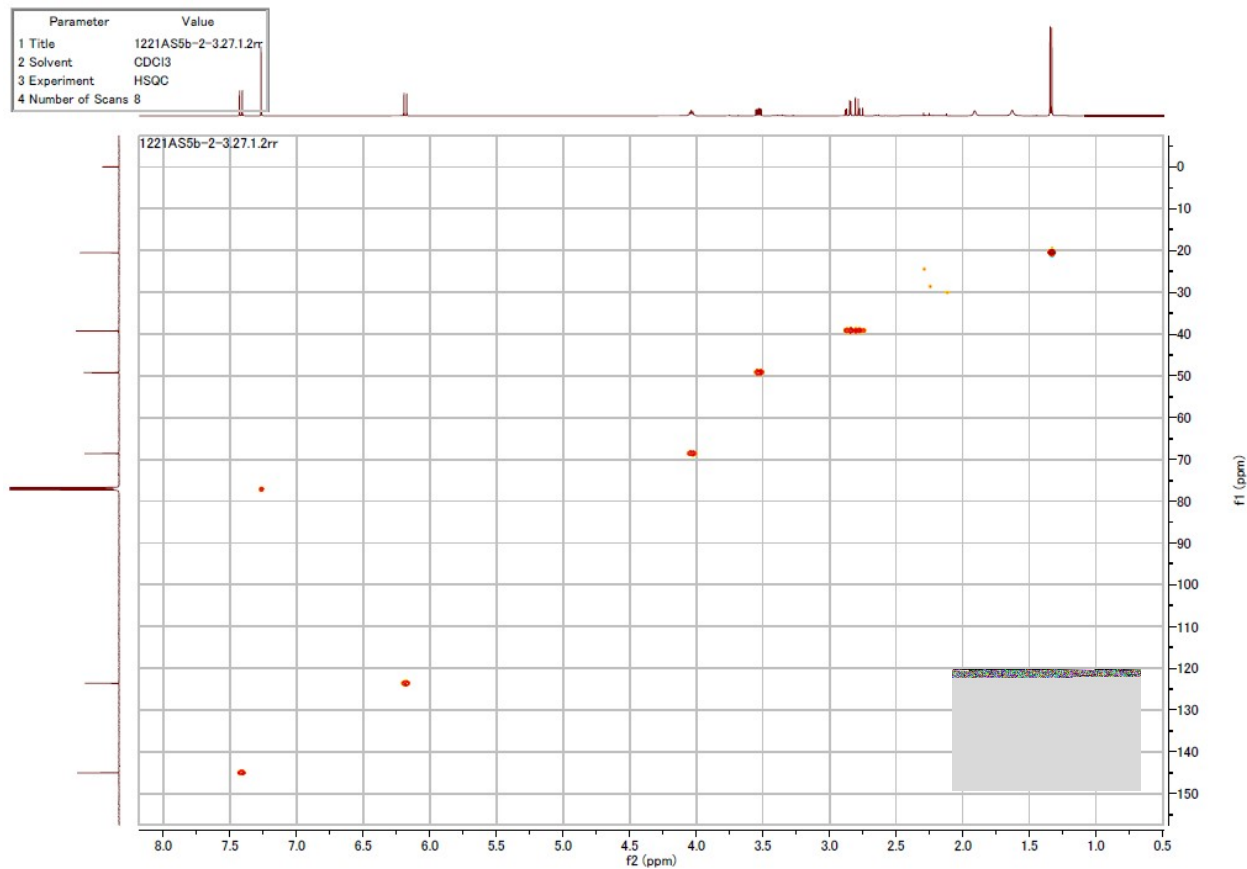

HMOC NMR (500 MHz) spectroscopic data of **7b**. Measured in  $\text{CDCl}_3$ .

| Parameter         | Value                 |
|-------------------|-----------------------|
| 1 Title           | 1221AS5b-2-3.28.1.2rr |
| 2 Solvent         | CDCl3                 |
| 3 Experiment      | HMBC                  |
| 4 Number of Scans | 16                    |

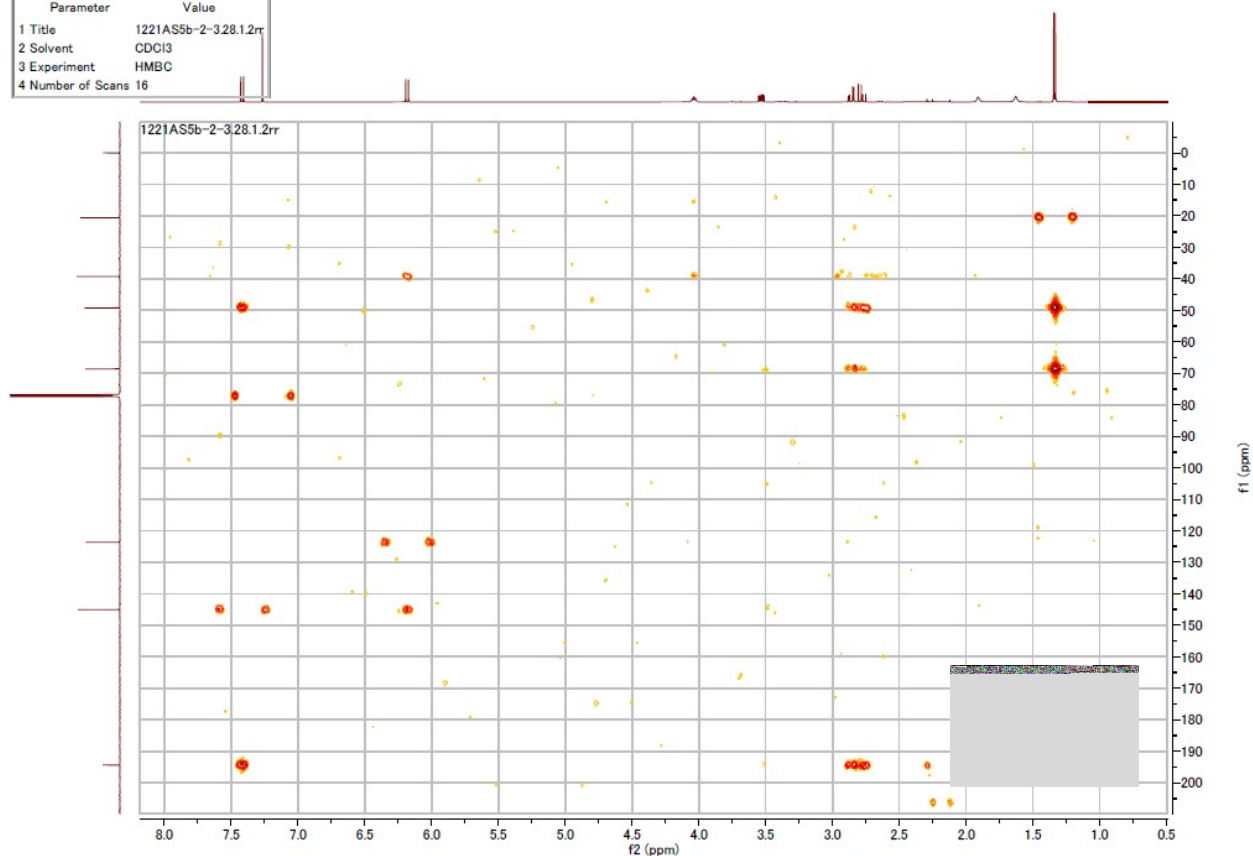

HMBC NMR (500 MHz) spectroscopic data of **7b**. Measured in CDCl<sub>3</sub>.

| Parameter         | Value                 |
|-------------------|-----------------------|
| 1 Title           | 1221AS5b-2-3.29.1.2rr |
| 2 Solvent         | CDCl3                 |
| 3 Experiment      | COSY                  |
| 4 Number of Scans | 8                     |

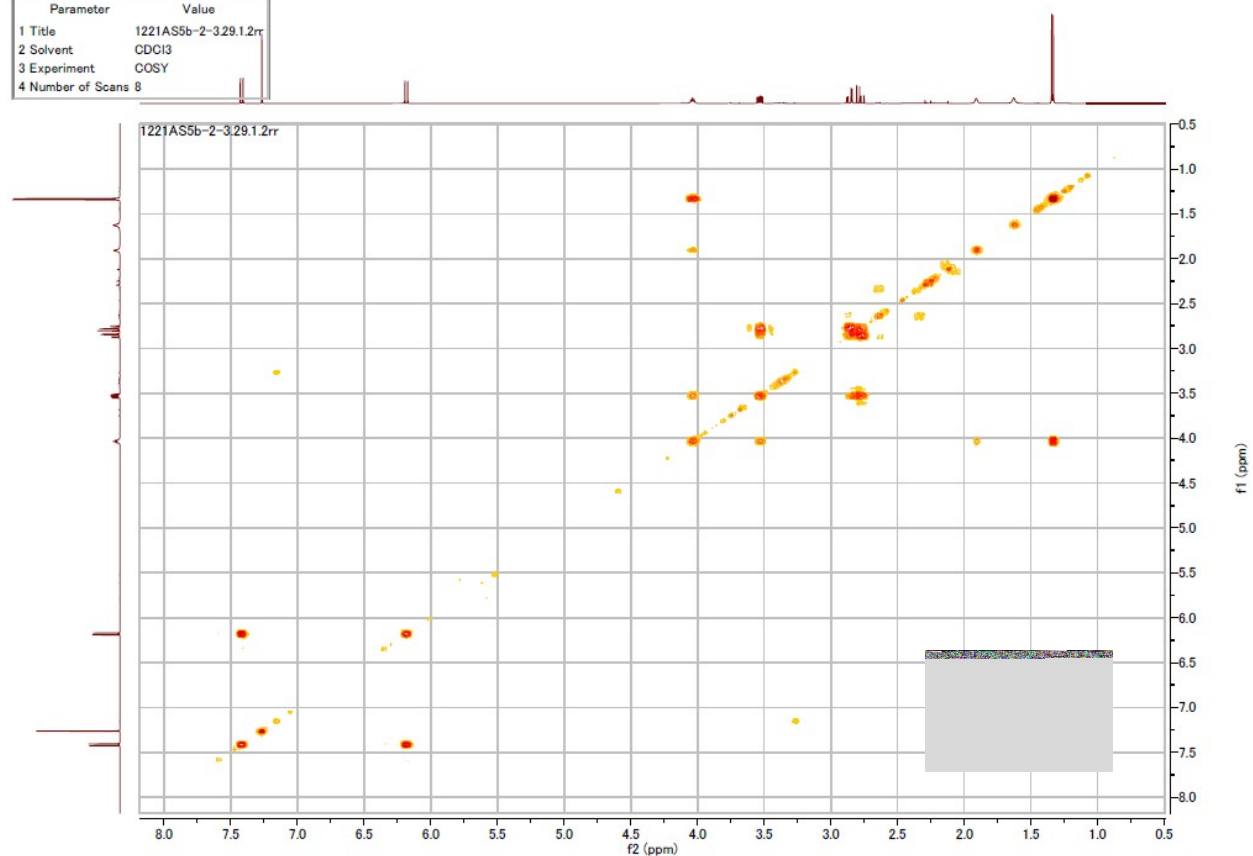

COSY NMR (500 MHz) spectroscopic data of **7b**. Measured in CDCl<sub>3</sub>.



# NMR spectroscopic data of **8a**

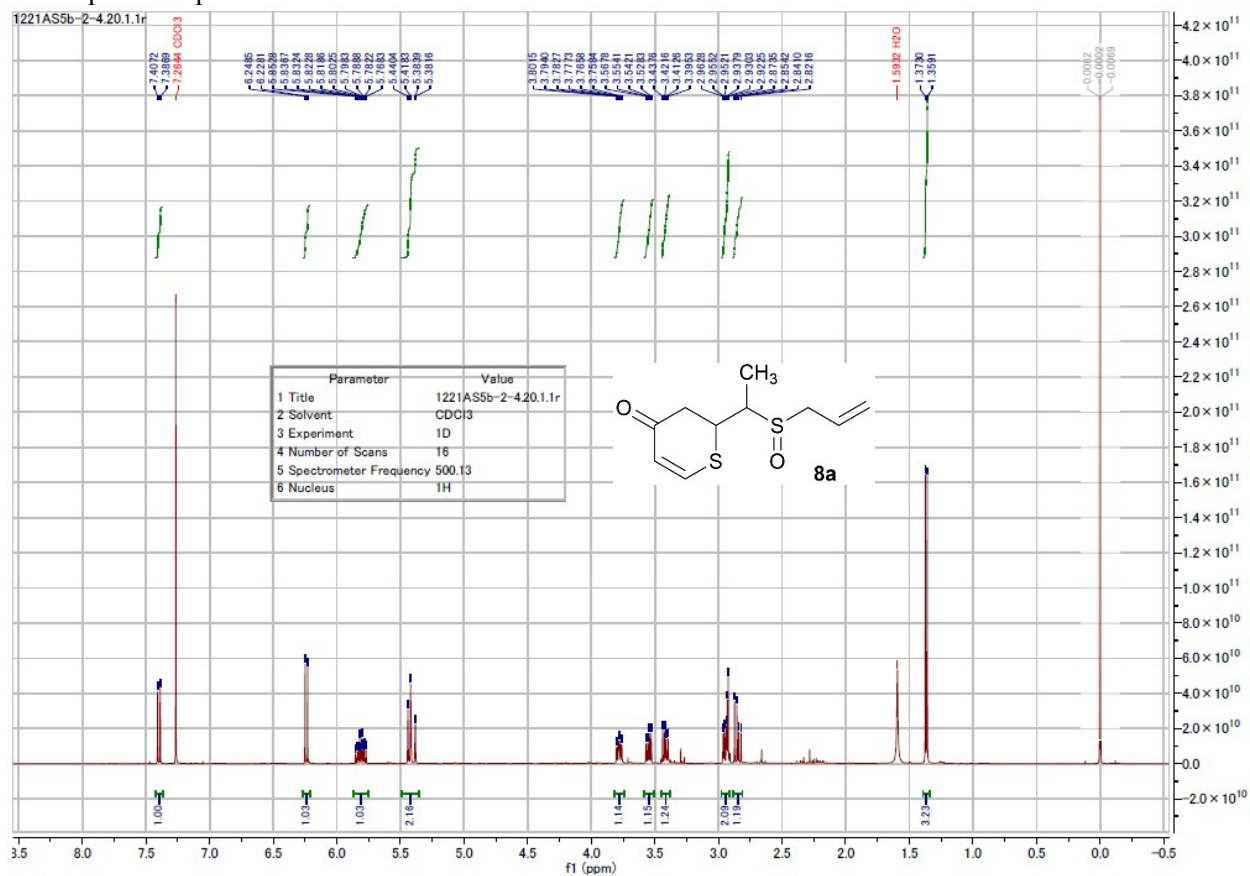

## <sup>1</sup>H-NMR (500 MHz) spectroscopic data of **8a**. Measured in CDCl<sub>3</sub>.

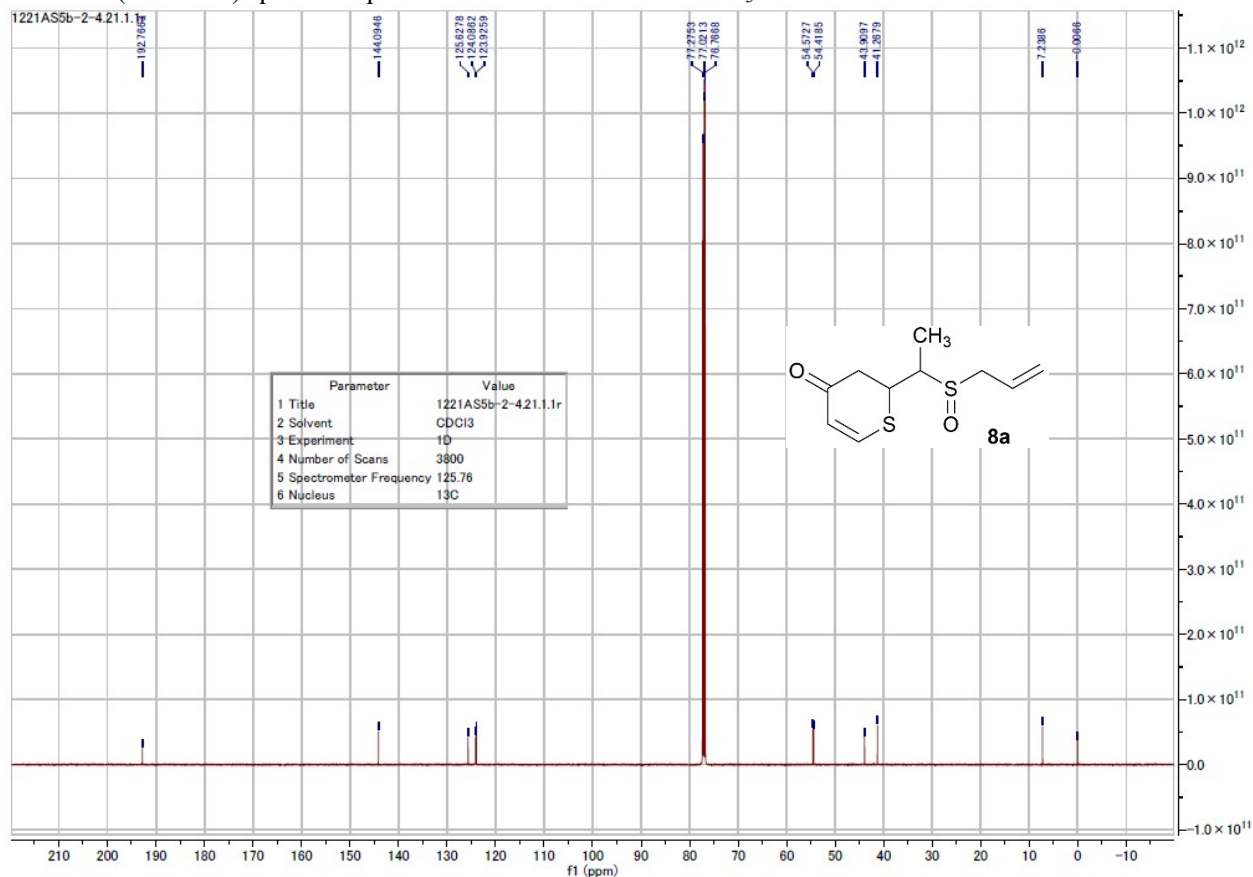

## <sup>13</sup>C-NMR (125 MHz) spectroscopic data of **8a**. Measured in CDCl<sub>3</sub>.

| Parameter         | Value                |
|-------------------|----------------------|
| 1 Title           | 1221AS5b-2-4.22.1.2r |
| 2 Solvent         | CDCl3                |
| 3 Experiment      | HSQC                 |
| 4 Number of Scans | 8                    |

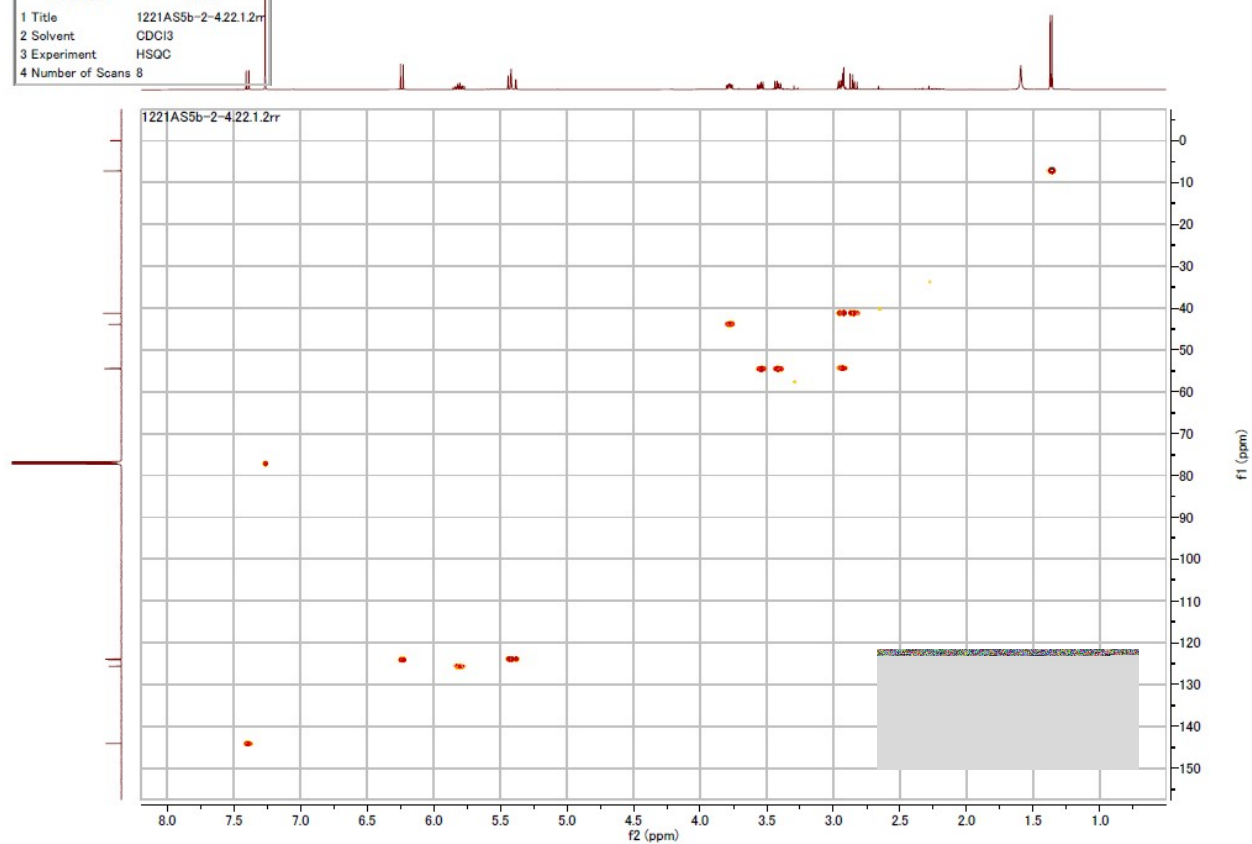

HMQC NMR (500 MHz) spectroscopic data of **8a**. Measured in CDCl<sub>3</sub>.

| Parameter         | Value                |
|-------------------|----------------------|
| 1 Title           | 1221AS5b-2-4.23.1.2r |
| 2 Solvent         | CDCl3                |
| 3 Experiment      | HMBC                 |
| 4 Number of Scans | 16                   |

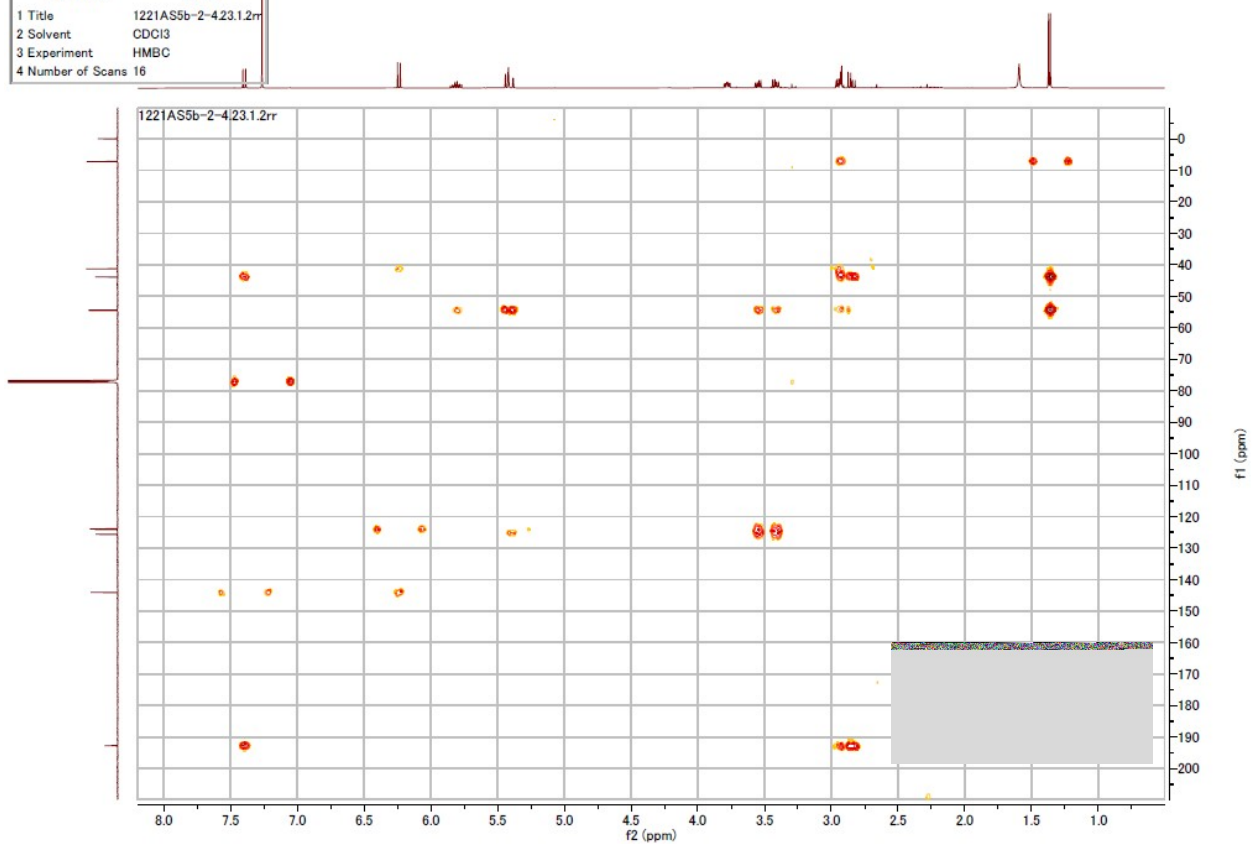

HMBC NMR (500 MHz) spectroscopic data of **8a**. Measured in CDCl<sub>3</sub>.



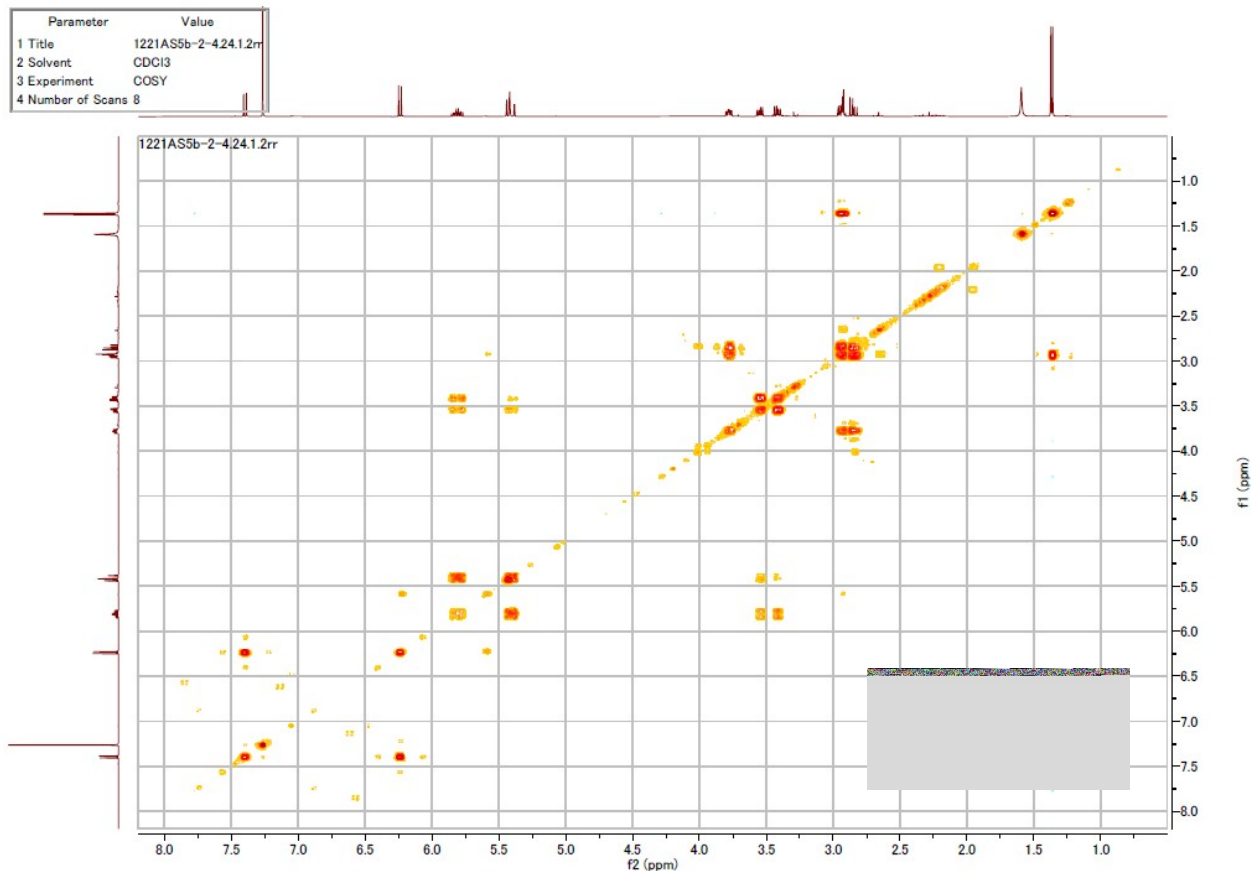

COSY NMR (500 MHz) spectroscopic data of **8a**. Measured in CDCl<sub>3</sub>.

NMR spectroscopic data of **8b**

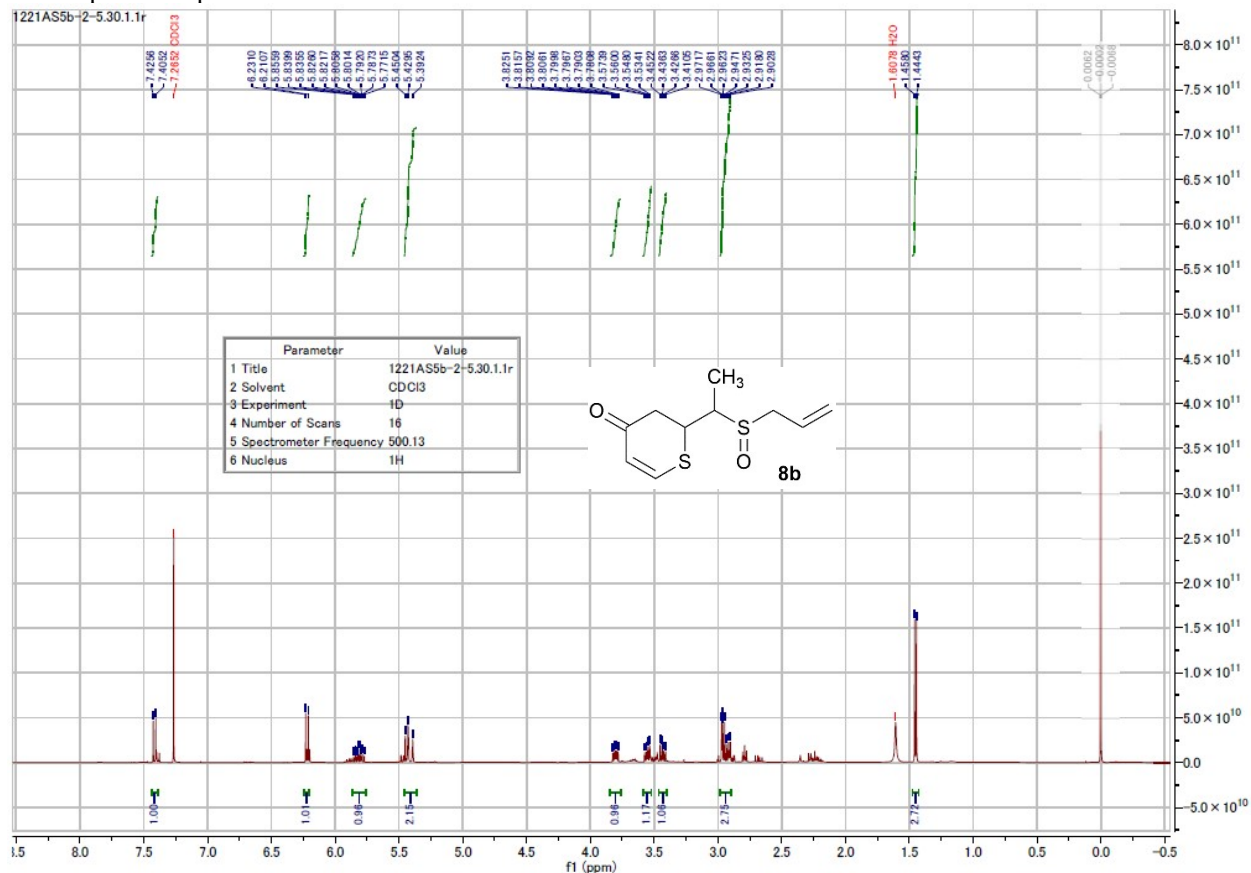

<sup>1</sup>H-NMR (500 MHz) spectroscopic data of **8b**. Measured in CDCl<sub>3</sub>.

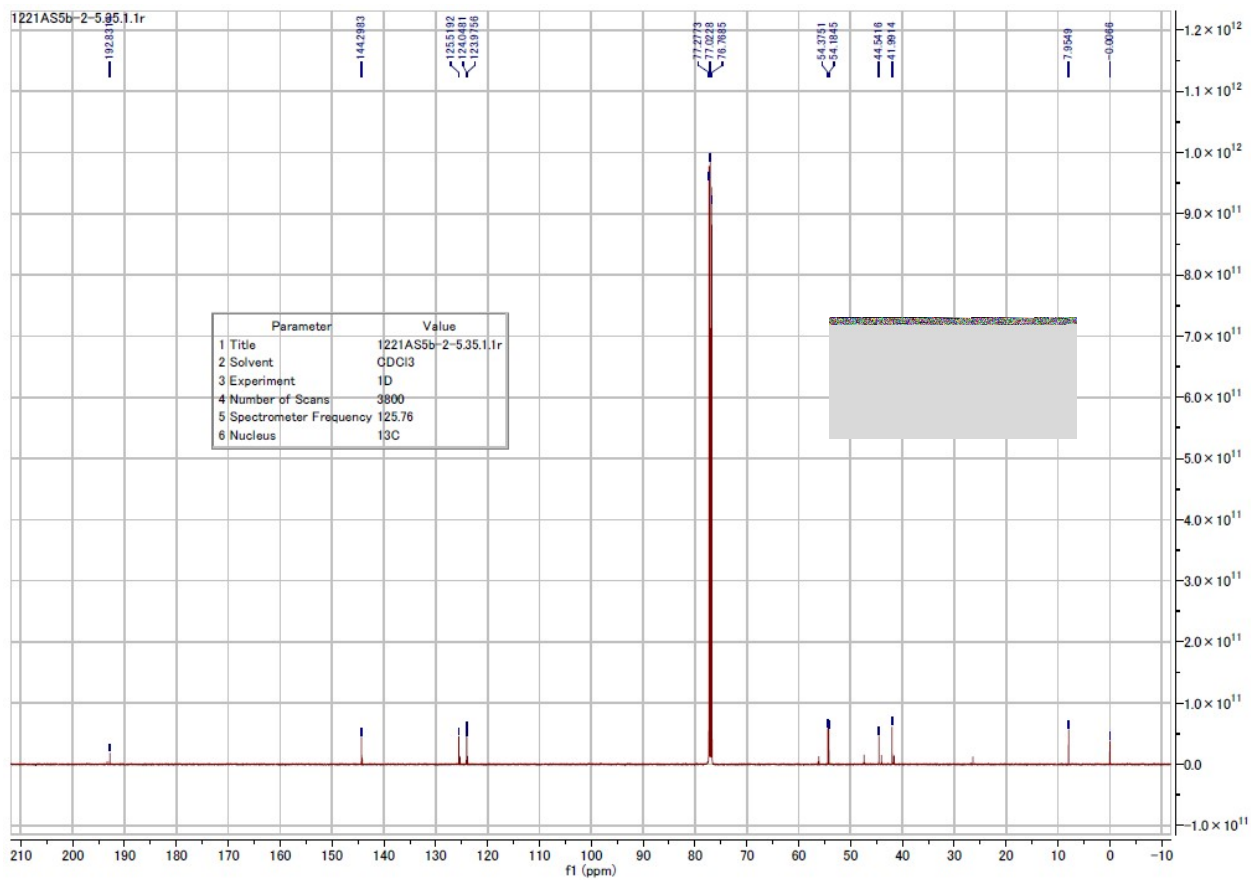

$^{13}\text{C}$ -NMR (125 MHz) spectroscopic data of **8b**. Measured in  $\text{CDCl}_3$ .

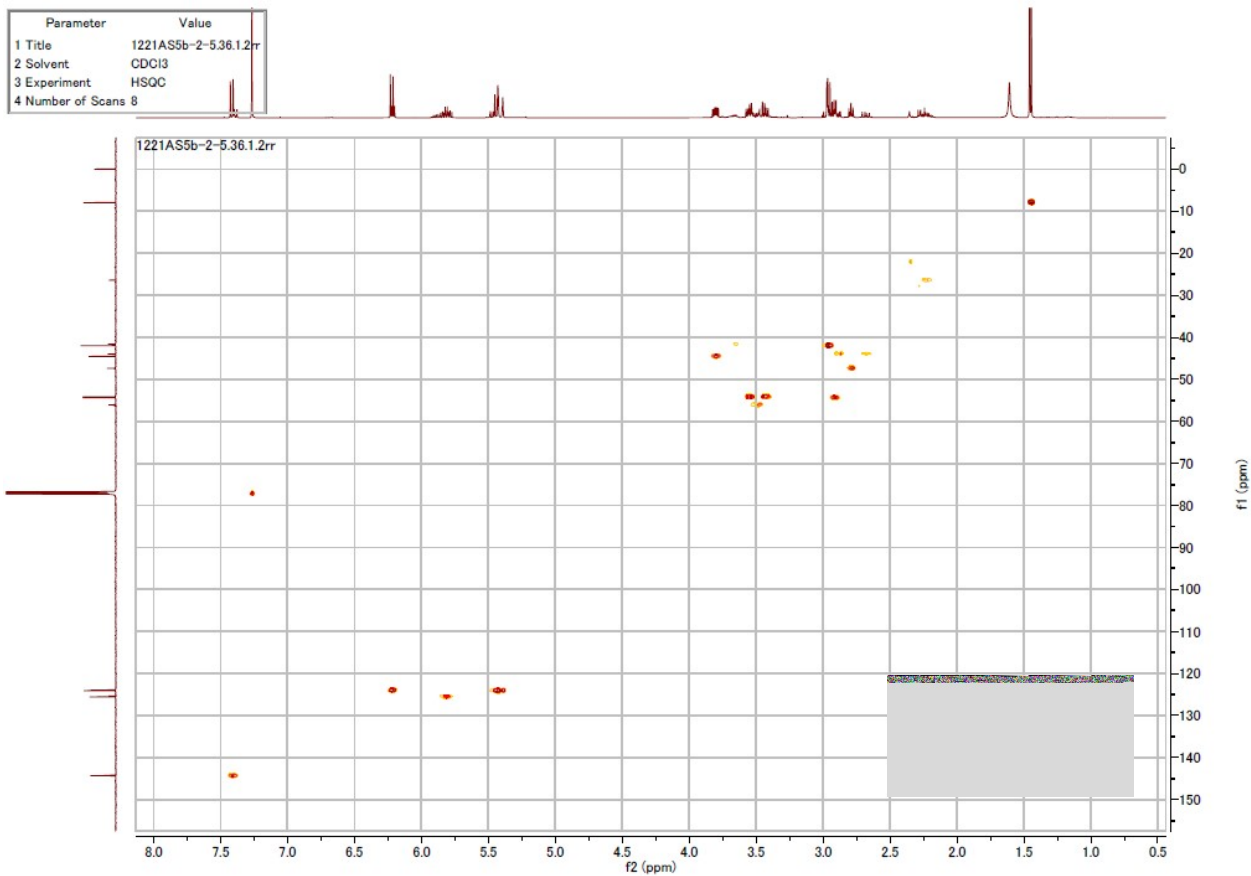

HMQC NMR (500 MHz) spectroscopic data of **8b**. Measured in  $\text{CDCl}_3$ .

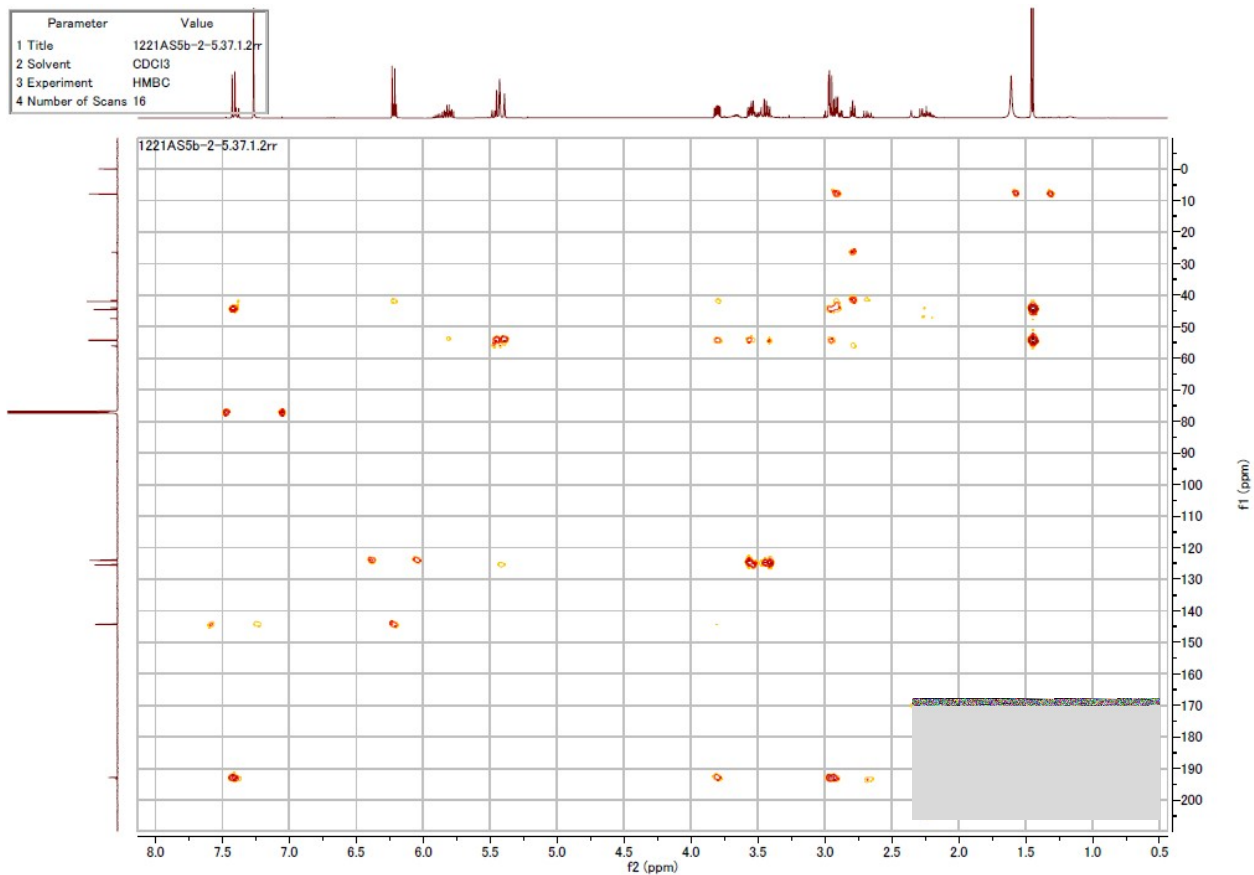

HMBC NMR (500 MHz) spectroscopic data of **8b**. Measured in CDCl<sub>3</sub>.

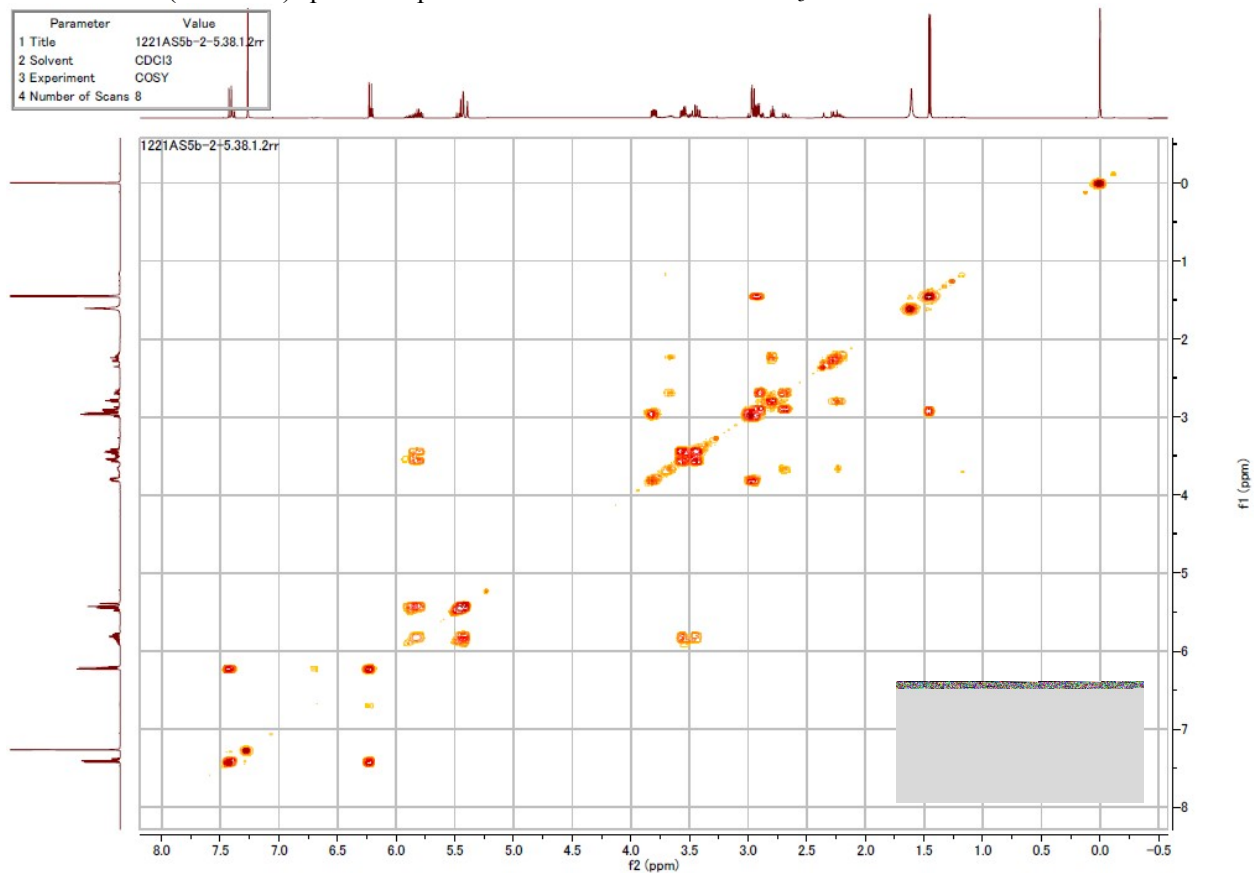

COSY NMR (500 MHz) spectroscopic data of **8b**. Measured in CDCl<sub>3</sub>.

# <sup>1</sup>H-NMR spectroscopic data of **8c**

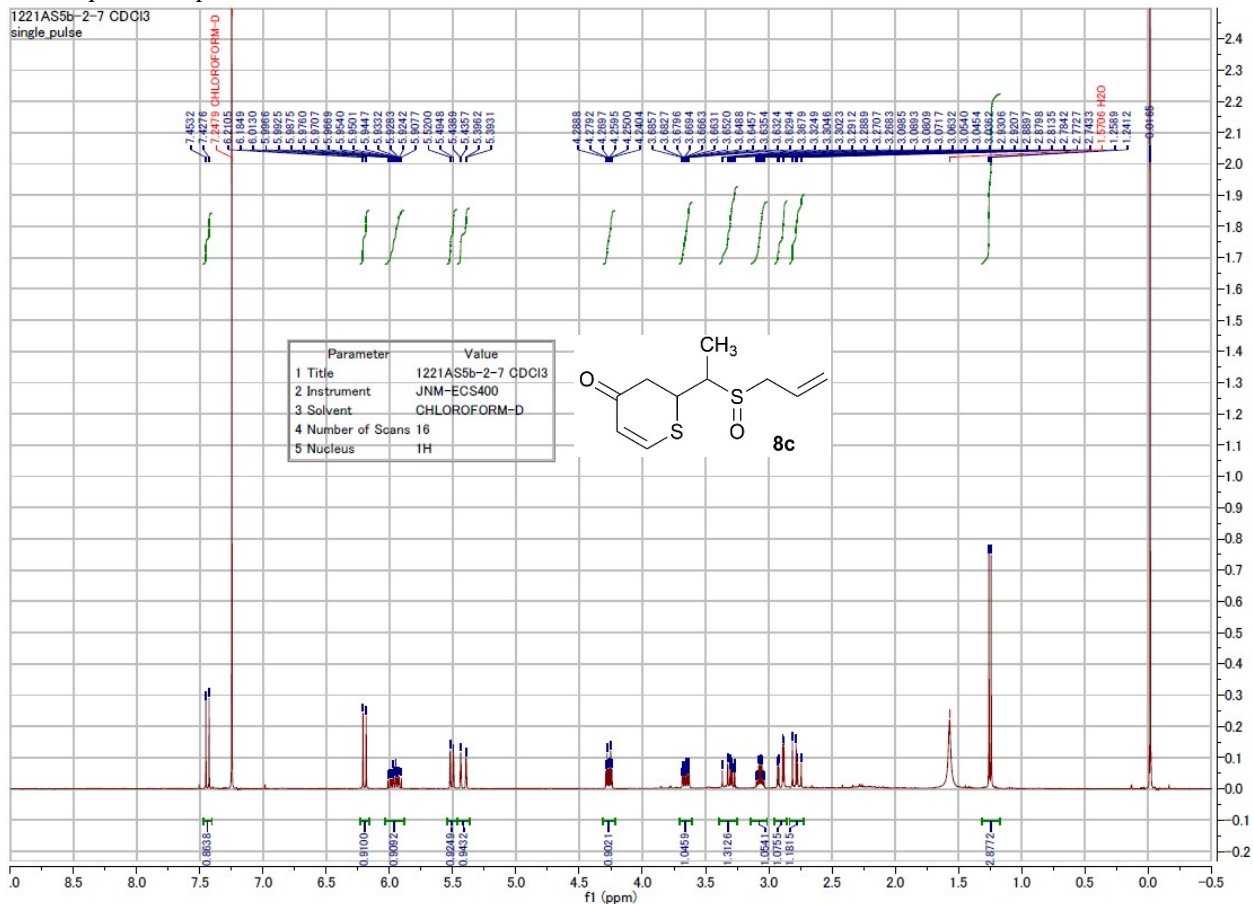

<sup>1</sup>H-NMR (400 MHz) spectroscopic data of **8c**. Measured in CDCl<sub>3</sub>.

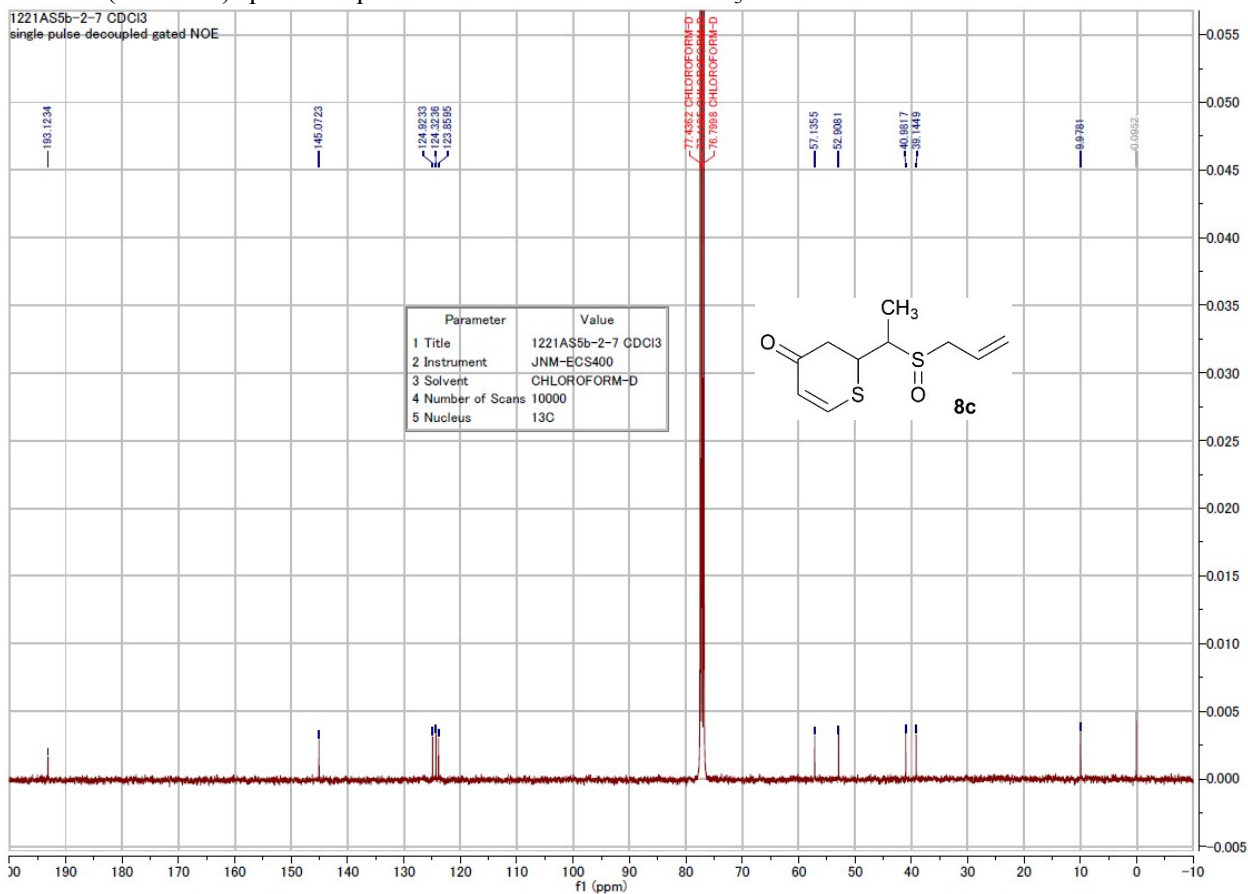

<sup>13</sup>C-NMR (100 MHz) spectroscopic data of **8c**. Measured in CDCl<sub>3</sub>.

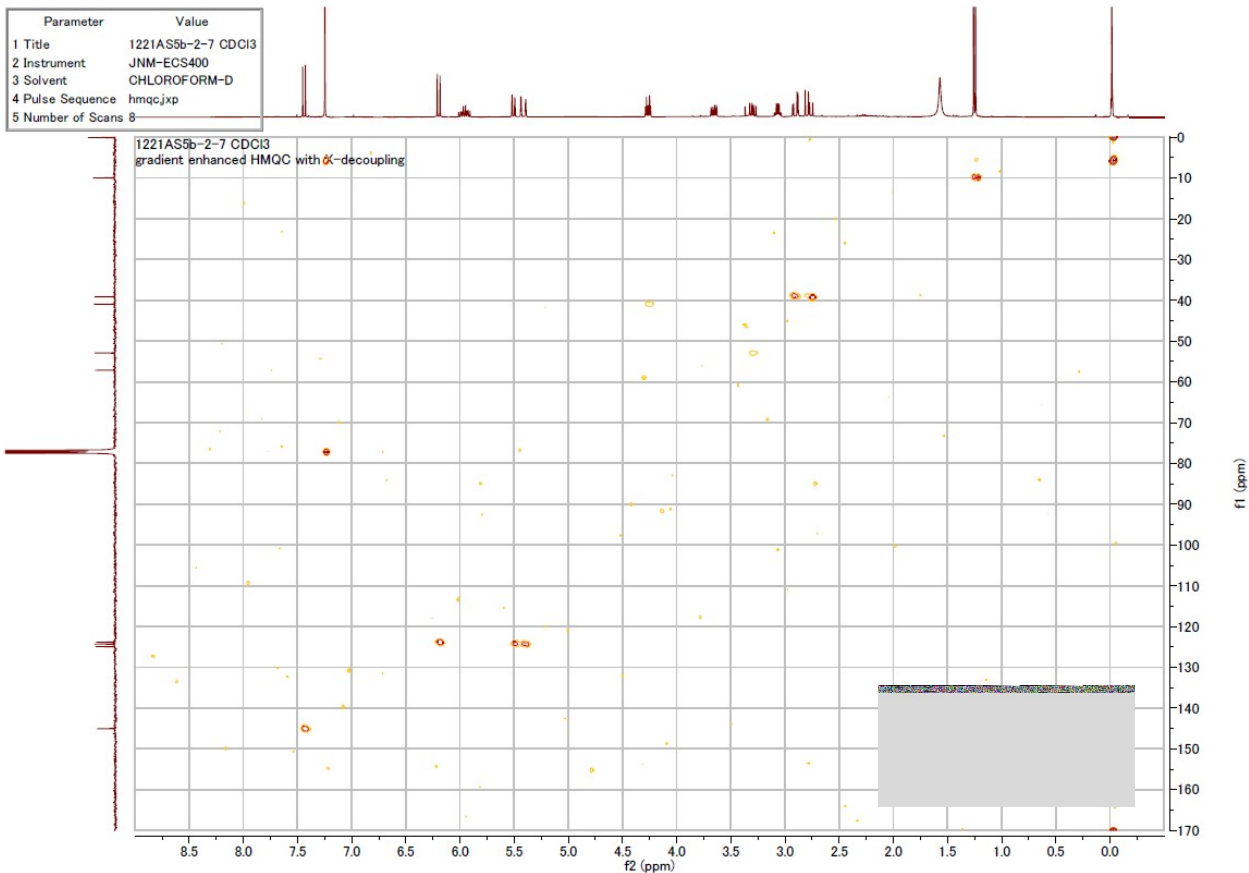

HMQC NMR (400 MHz) spectroscopic data of **8c**. Measured in  $\text{CDCl}_3$ .

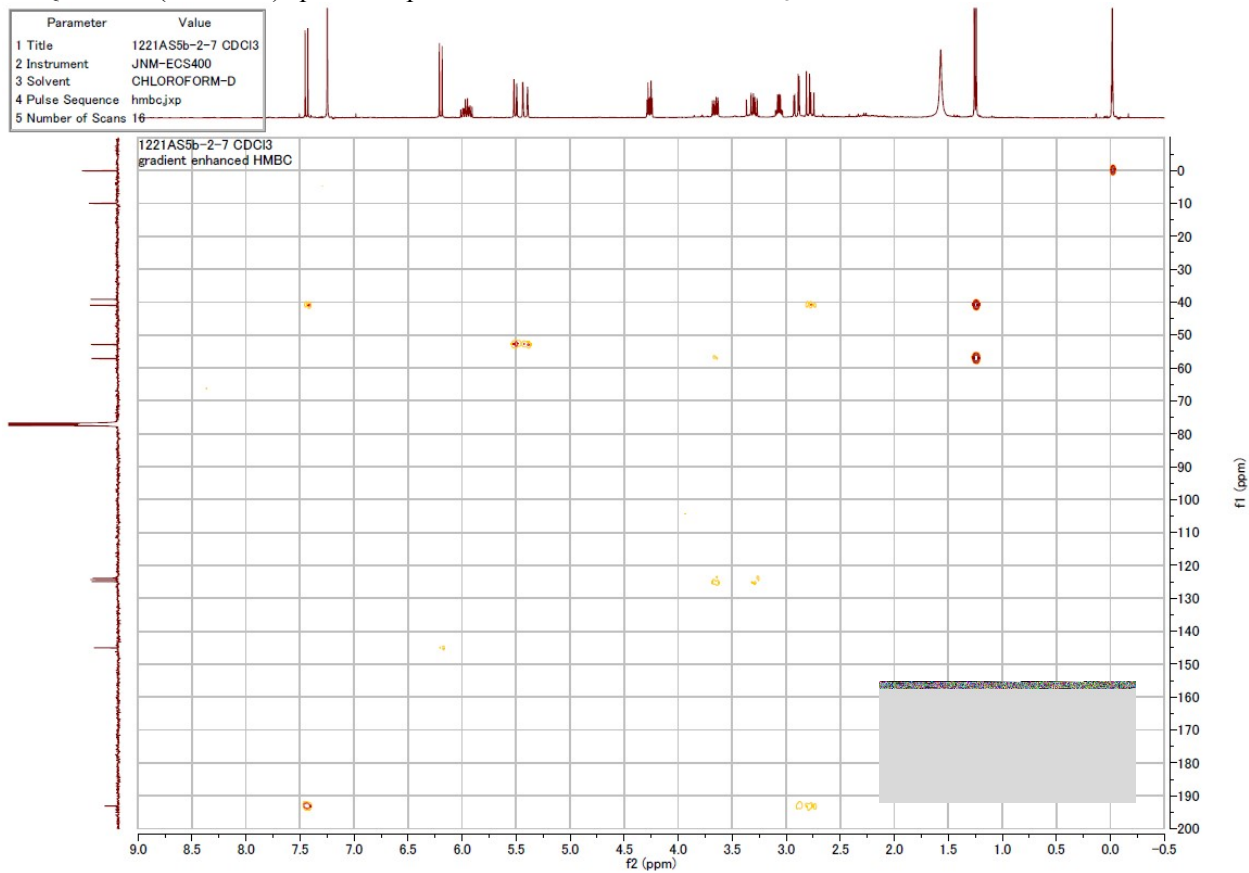

HMBC NMR (400 MHz) spectroscopic data of **8c**. Measured in  $\text{CDCl}_3$ .

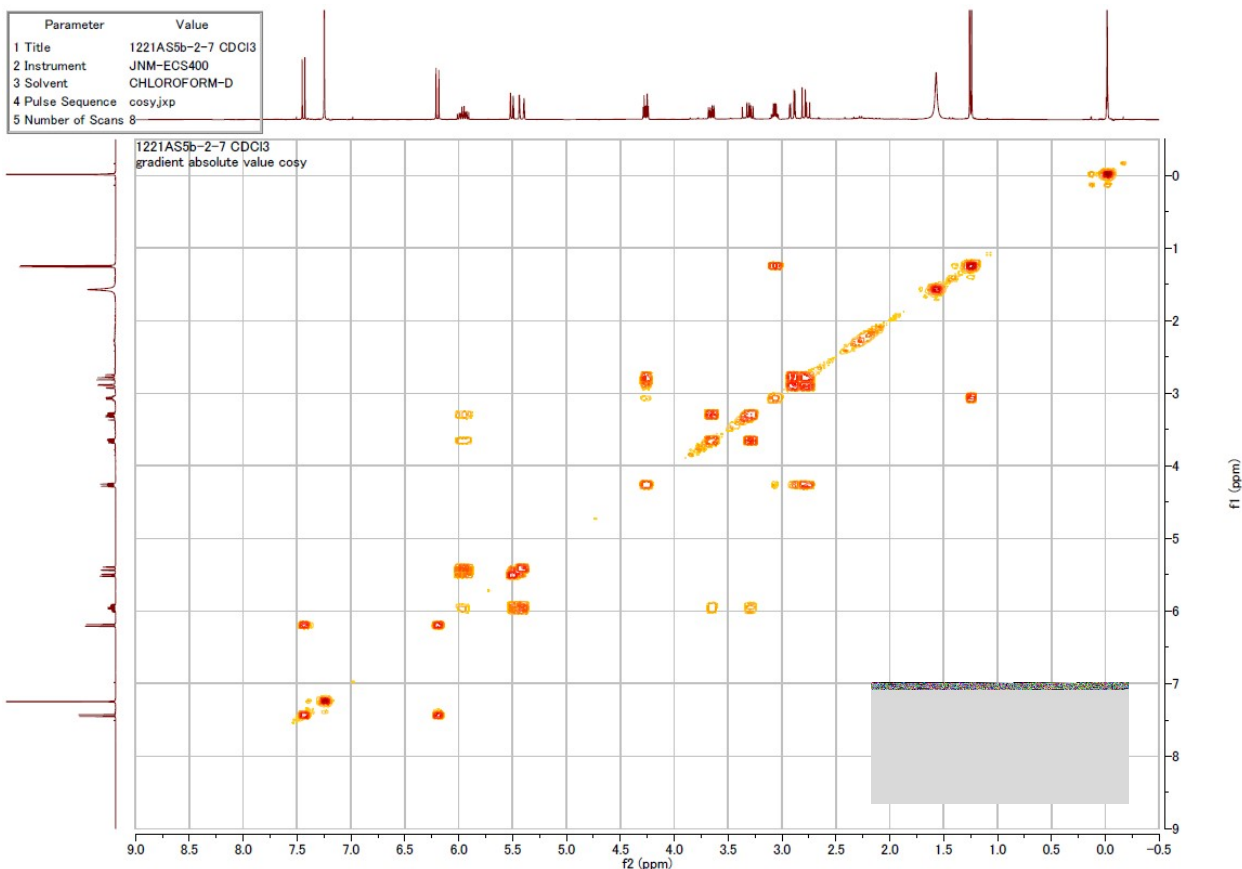

COSY NMR (400 MHz) spectroscopic data of **8c**. Measured in CDCl<sub>3</sub>.

NMR spectroscopic data of **8d**

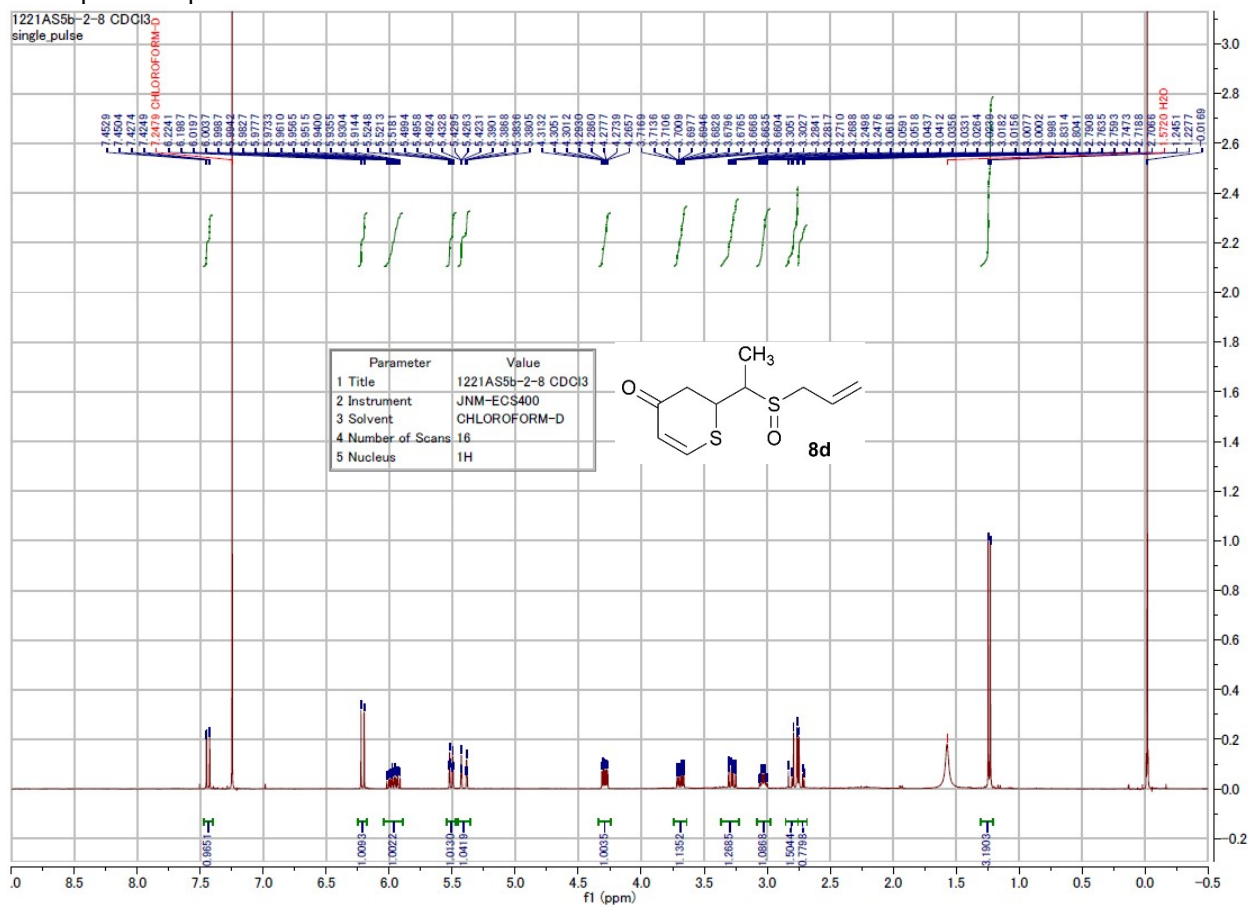

<sup>1</sup>H-NMR (400 MHz) spectroscopic data of **8d**. Measured in CDCl<sub>3</sub>.



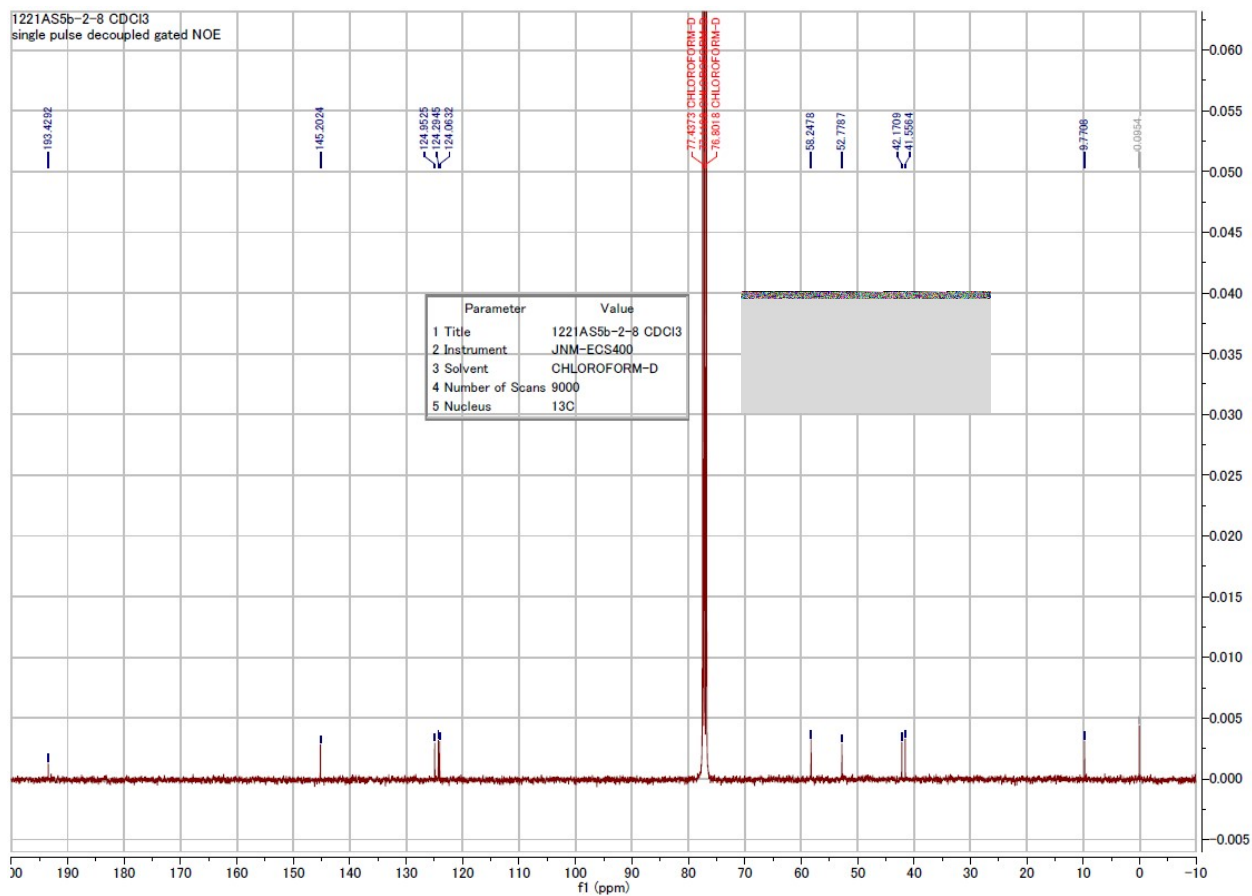

<sup>13</sup>C-NMR (100 MHz) spectroscopic data of **8d**. Measured in CDCl<sub>3</sub>.

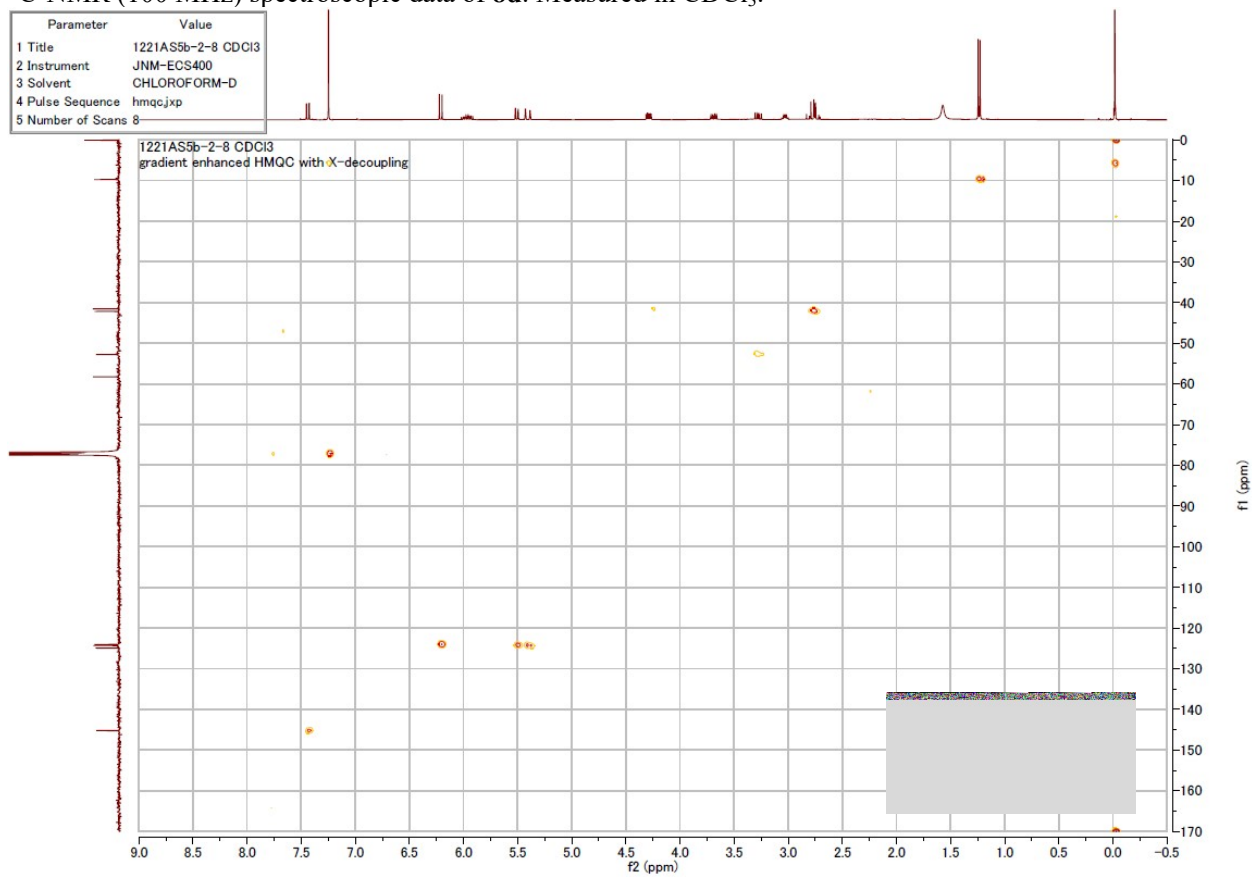

HMQC NMR (400 MHz) spectroscopic data of **8d**. Measured in CDCl<sub>3</sub>.

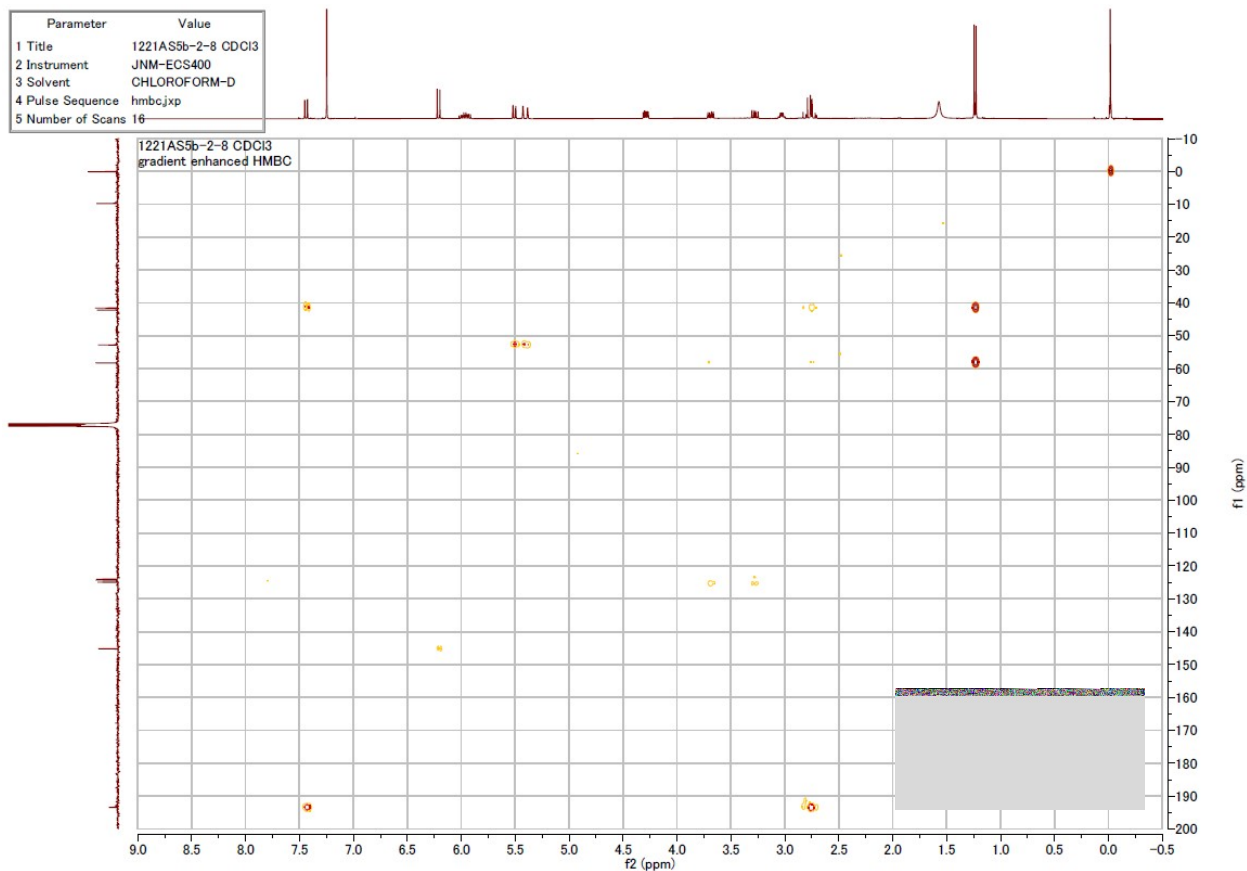

HMBC NMR (400 MHz) spectroscopic data of **8d**. Measured in CDCl<sub>3</sub>.

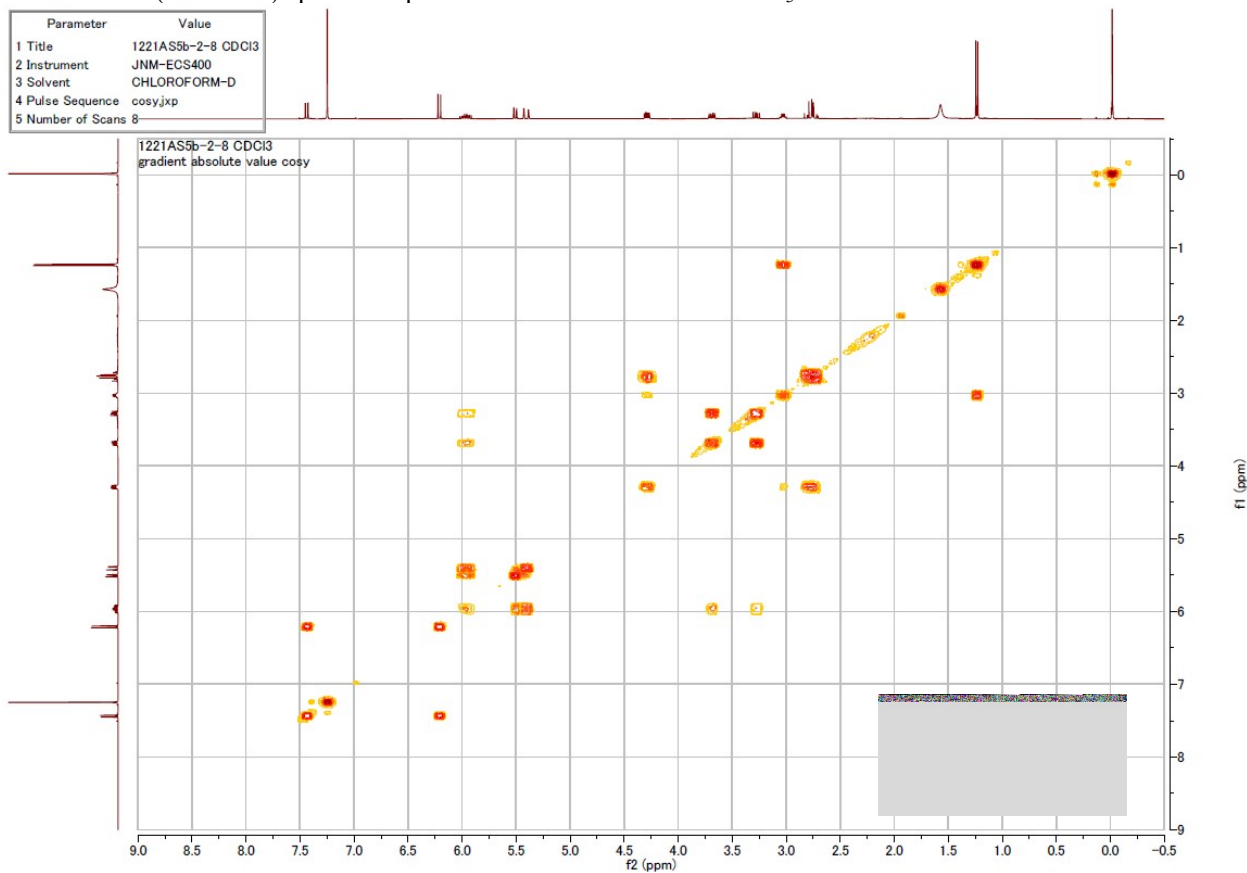

COSY NMR (400 MHz) spectroscopic data of **8d**. Measured in CDCl<sub>3</sub>.



# NMR spectroscopic data of 9

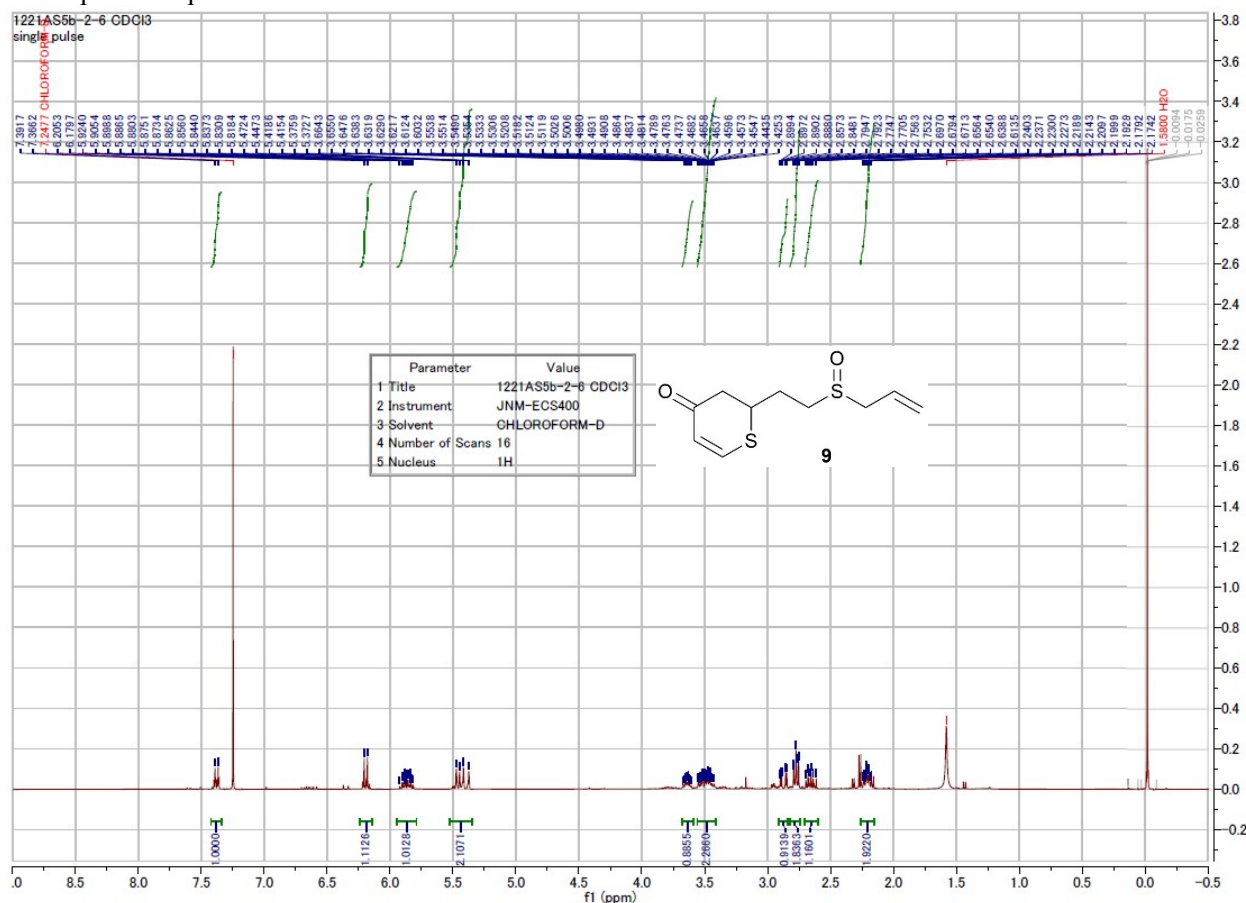

<sup>1</sup>H-NMR (400 MHz) spectroscopic data of 9. Measured in CDCl<sub>3</sub>.

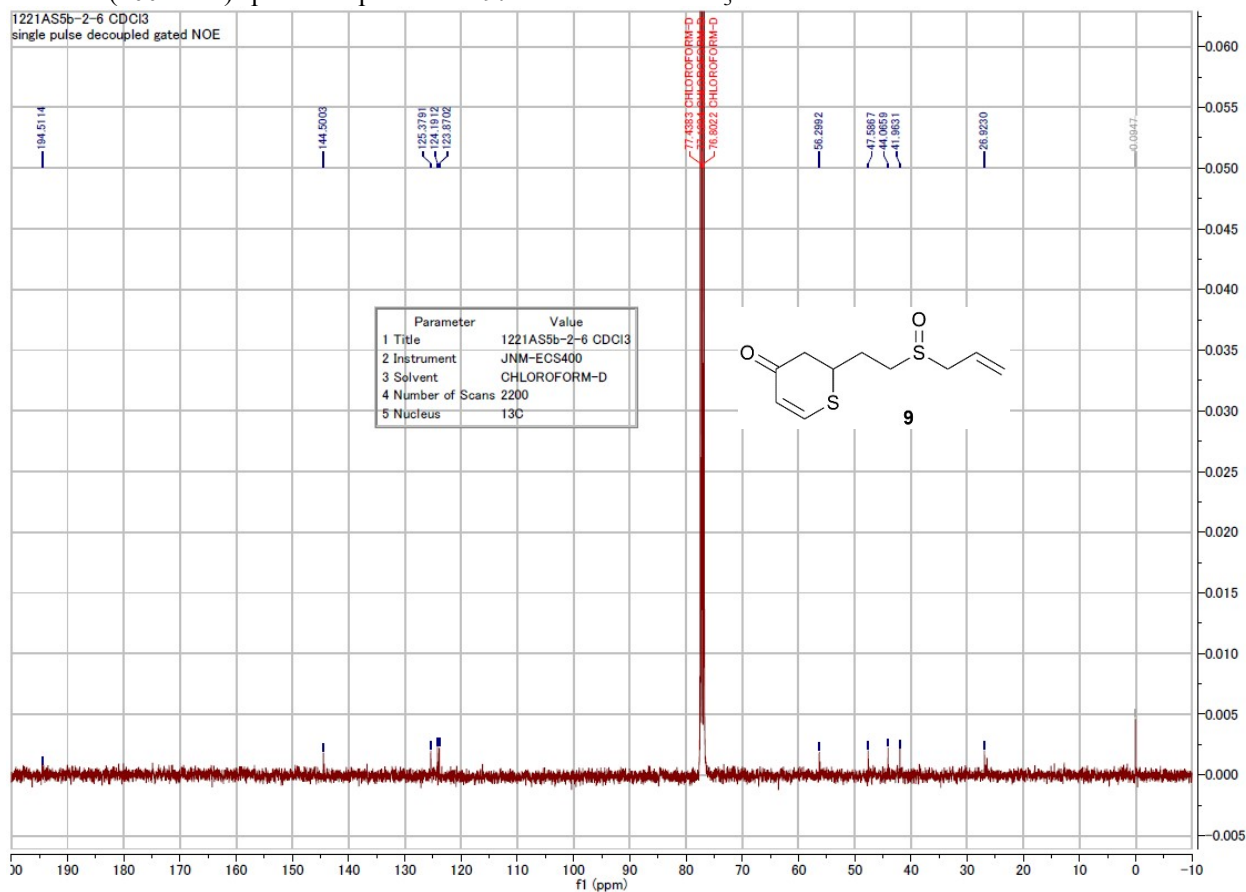

<sup>13</sup>C-NMR (100 MHz) spectroscopic data of 9. Measured in CDCl<sub>3</sub>.

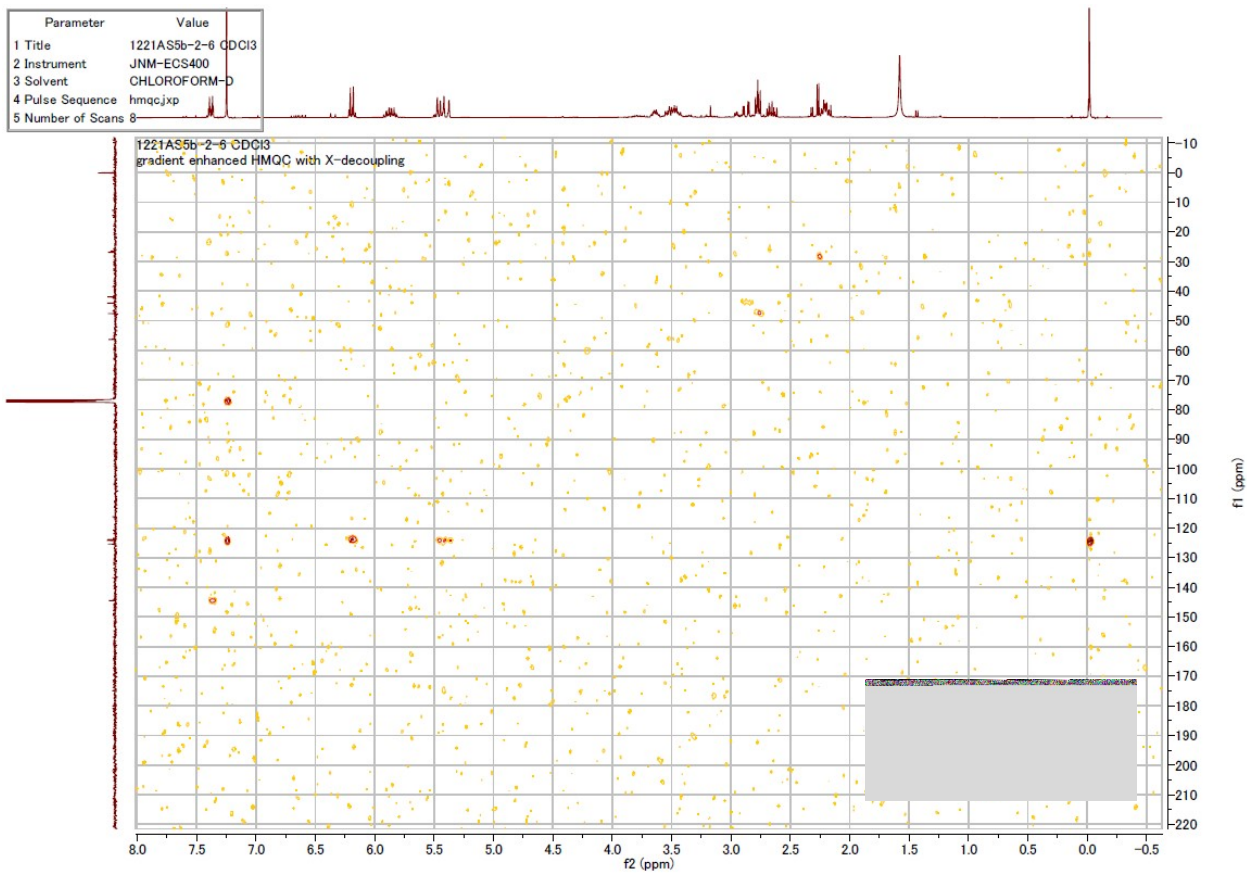

HMQC NMR (400 MHz) spectroscopic data of **9**. Measured in  $\text{CDCl}_3$ .

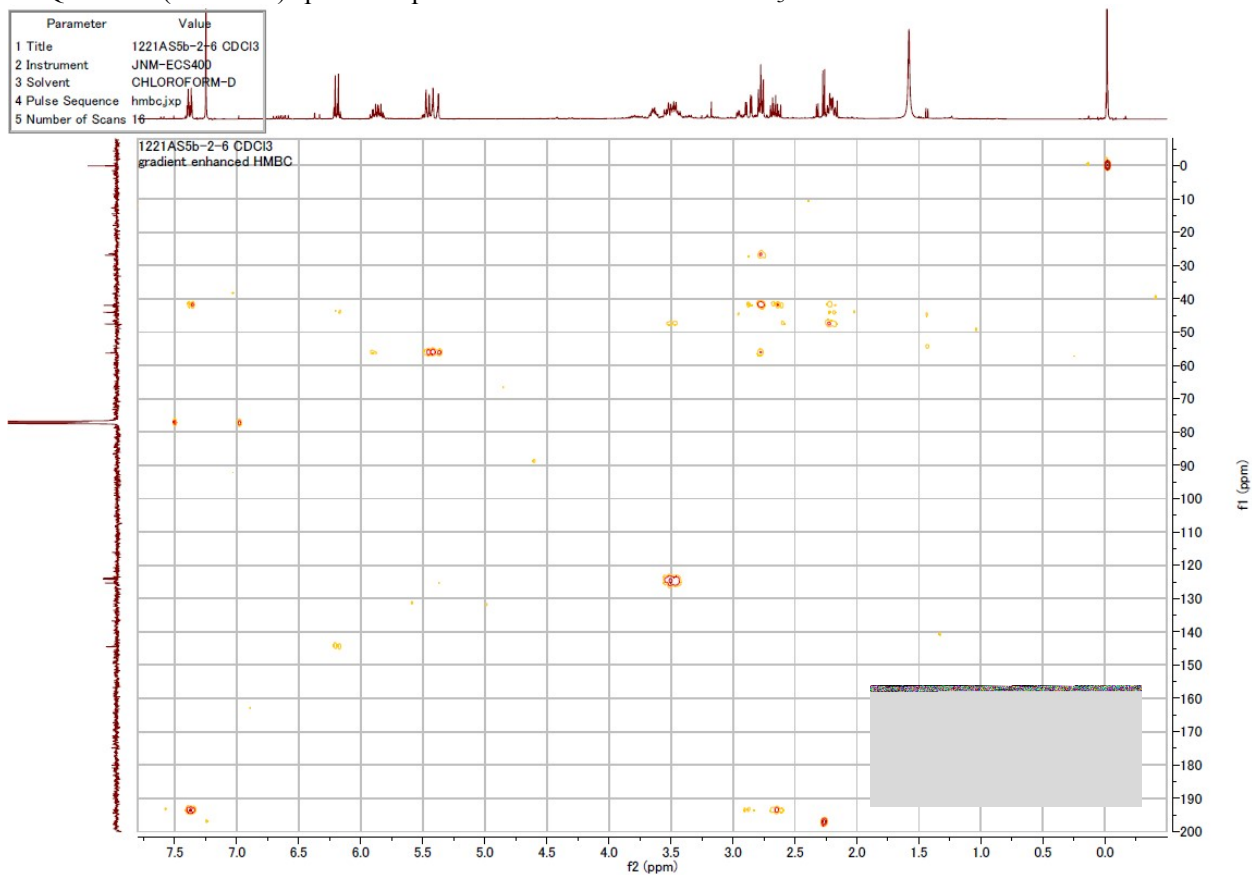

HMBC NMR (400 MHz) spectroscopic data of **9**. Measured in  $\text{CDCl}_3$ .

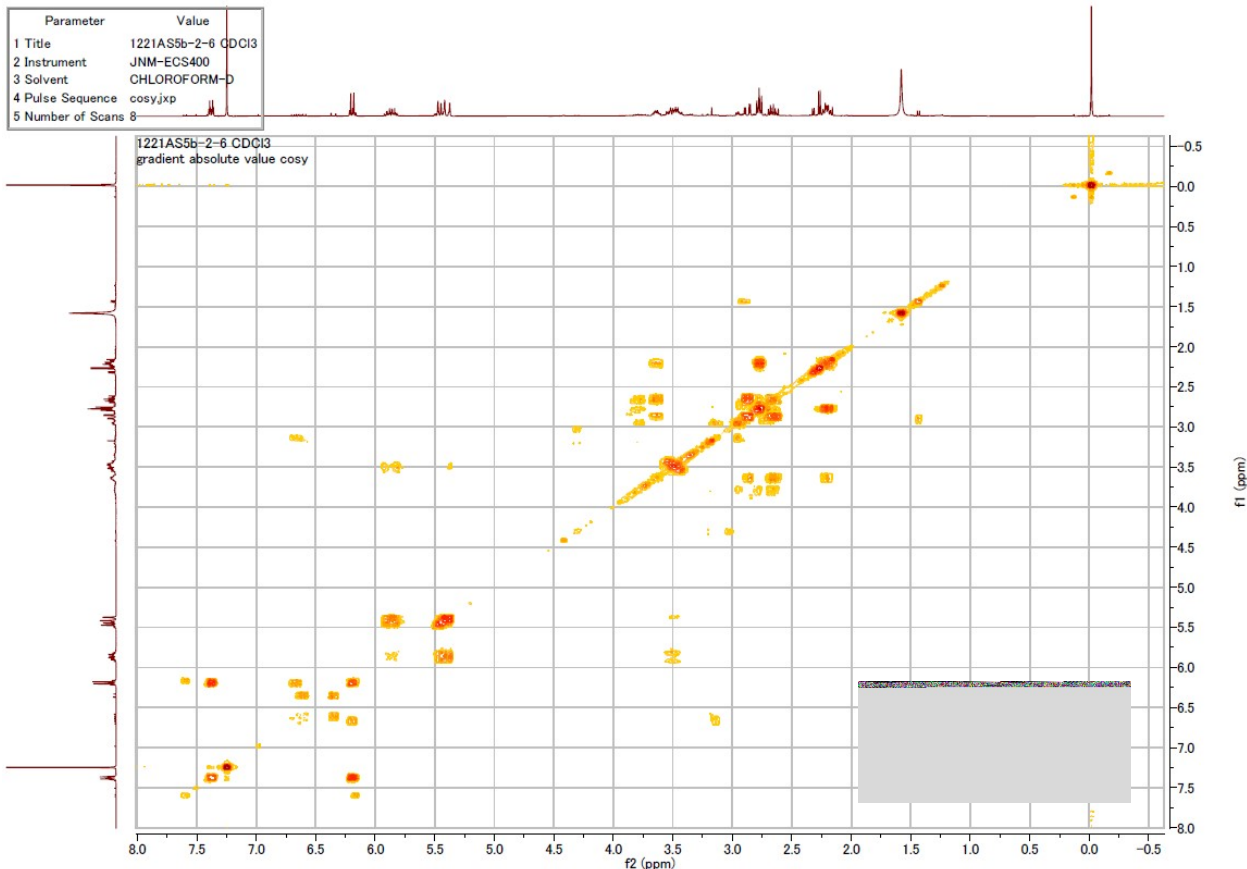

COSY NMR (400 MHz) spectroscopic data of **9**. Measured in CDCl<sub>3</sub>.

NMR spectroscopic data of **10**

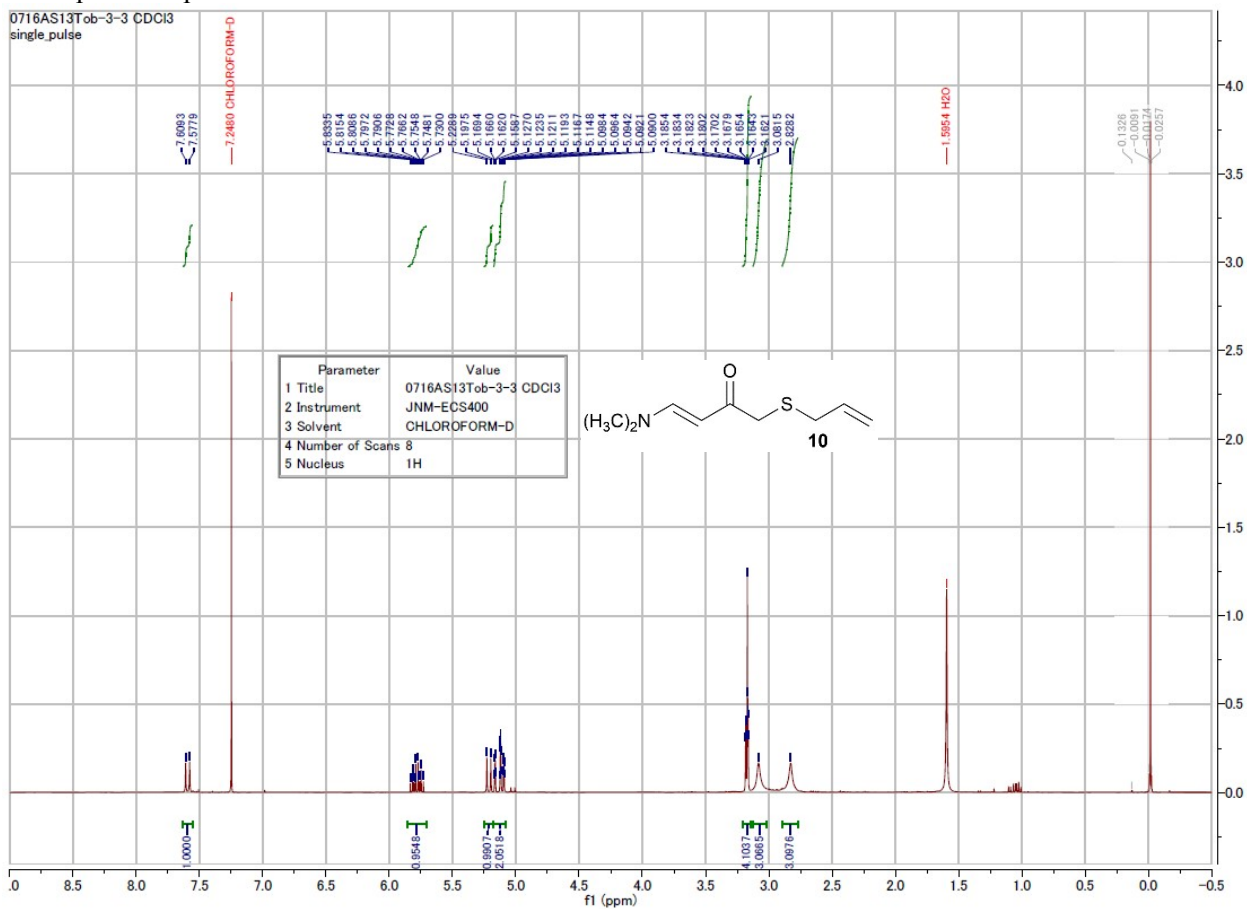

<sup>1</sup>H-NMR (400 MHz) spectroscopic data of **10**. Measured in CDCl<sub>3</sub>.

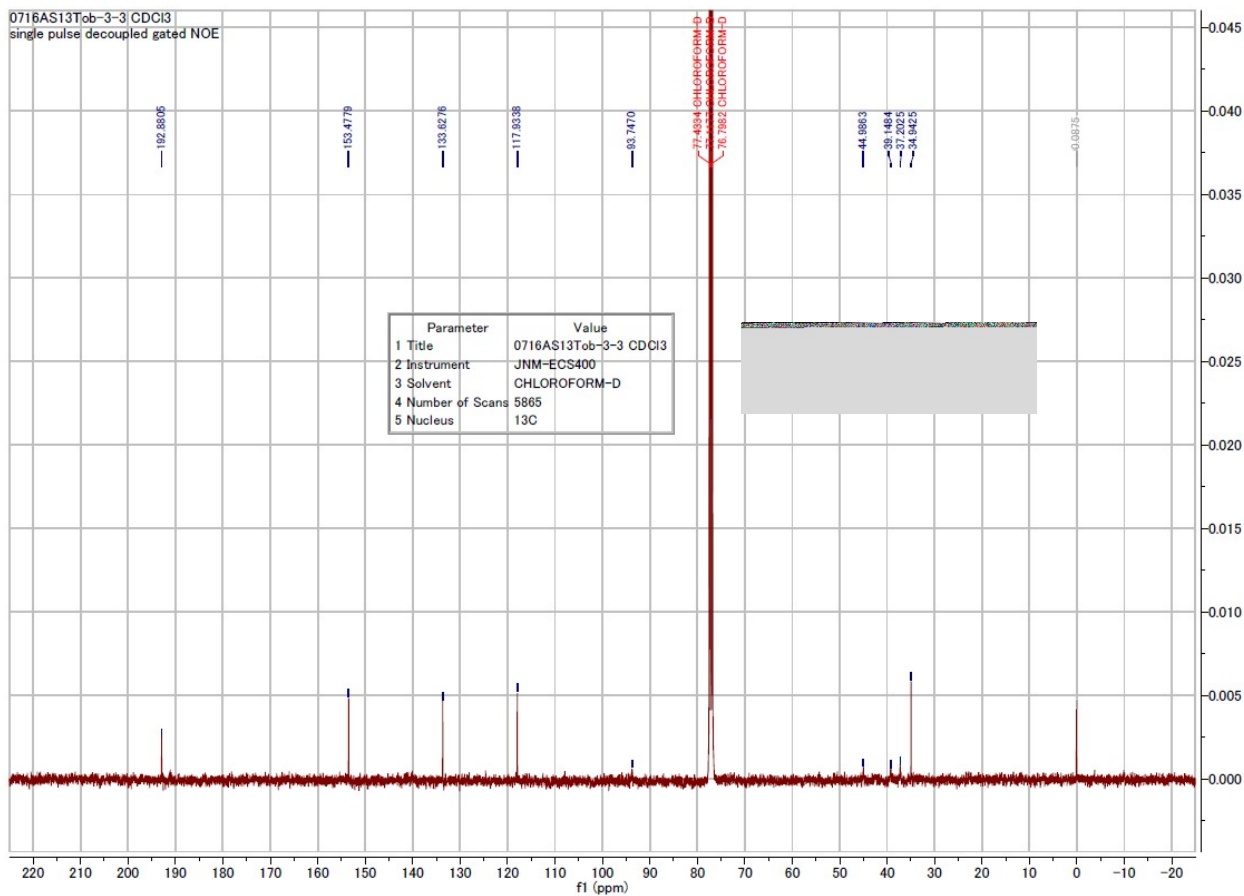

<sup>13</sup>C-NMR (100 MHz) spectroscopic data of **10**. Measured in CDCl<sub>3</sub>.

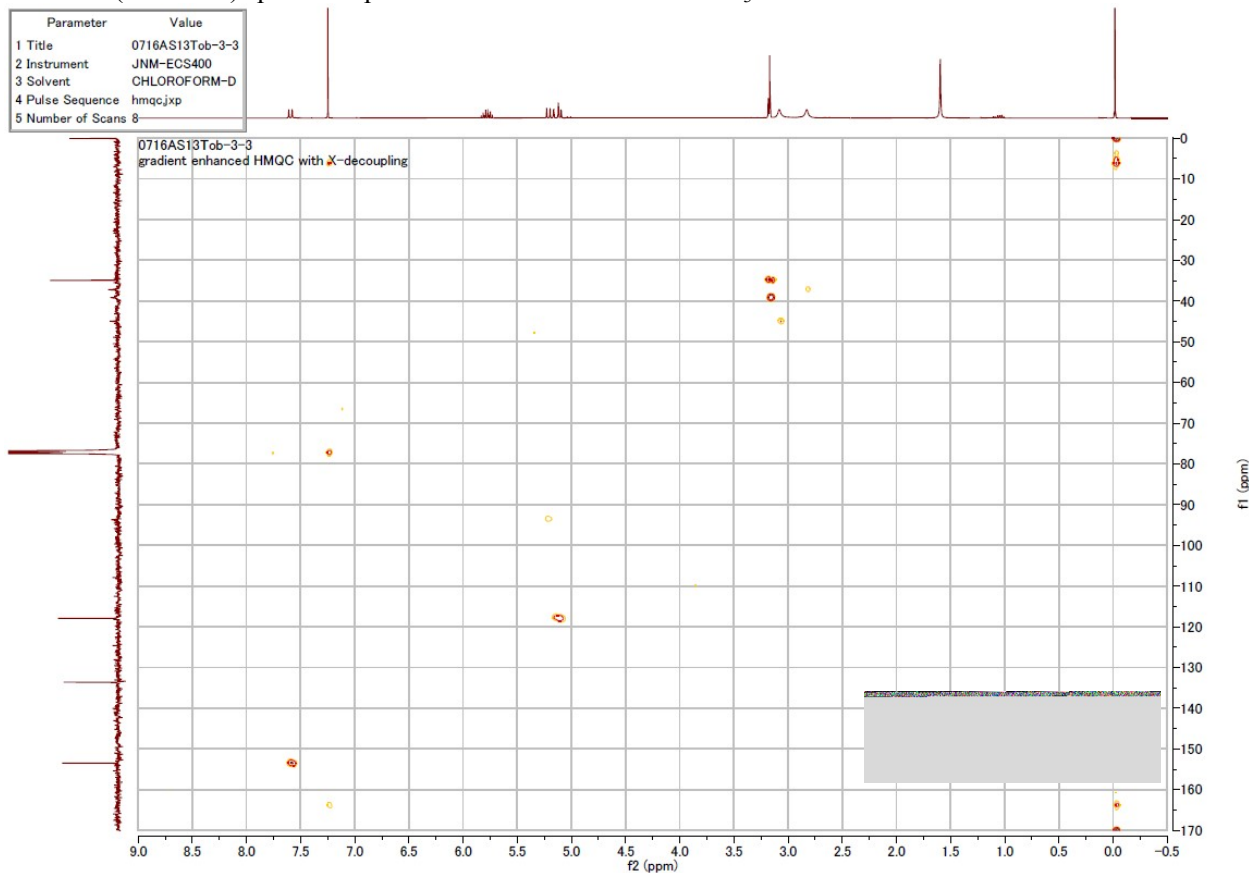

HMQC NMR (400 MHz) spectroscopic data of **10**. Measured in CDCl<sub>3</sub>.

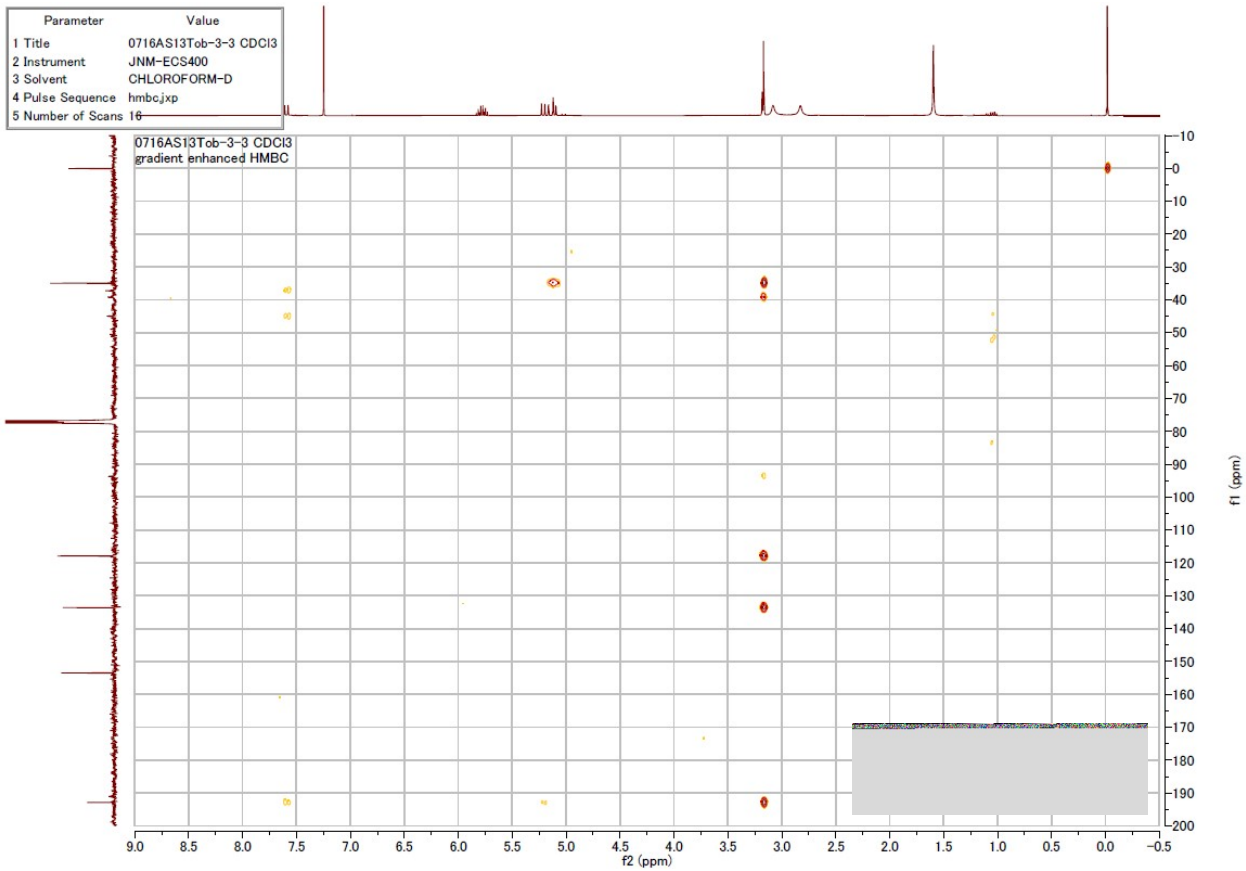

HMBC NMR (400 MHz) spectroscopic data of **10**. Measured in CDCl<sub>3</sub>.

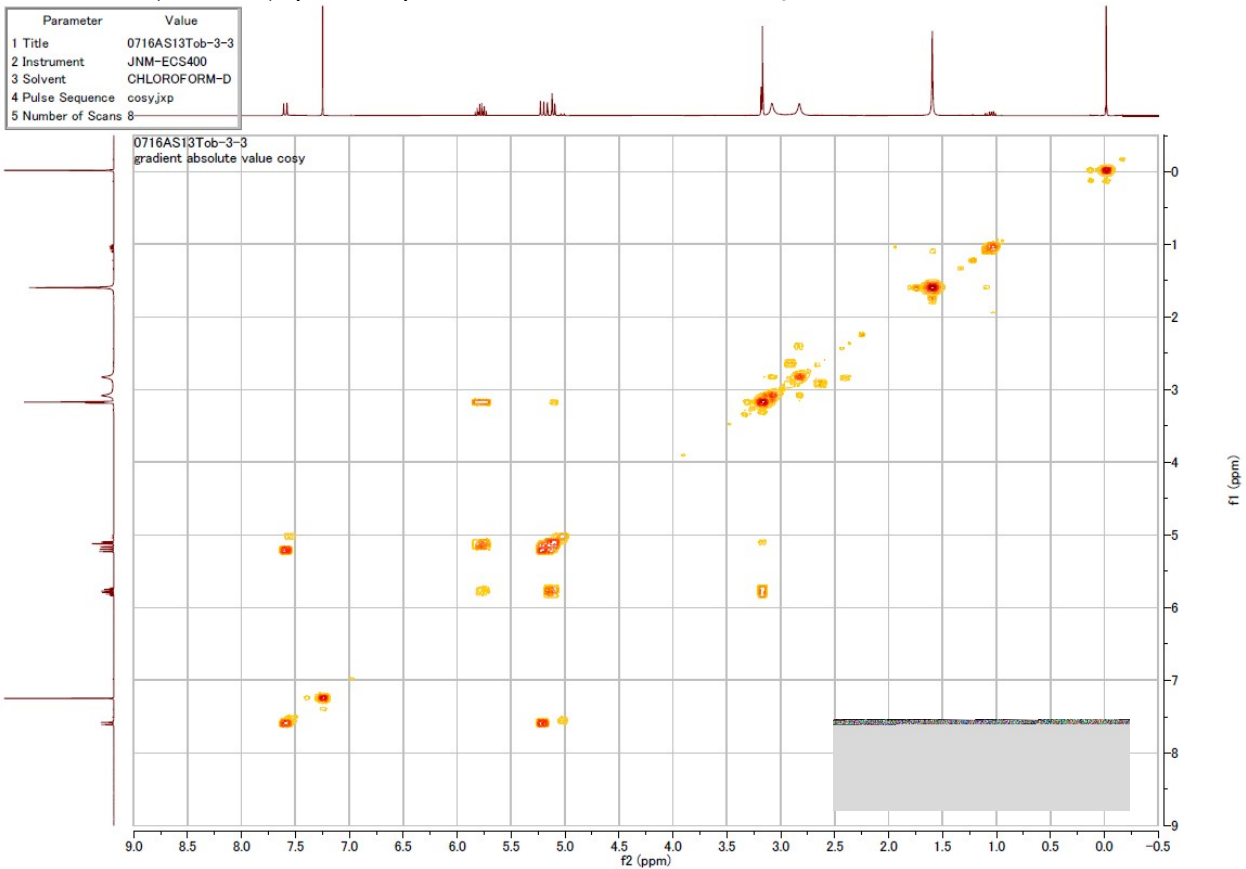

COSY NMR (400 MHz) spectroscopic data of **10**. Measured in CDCl<sub>3</sub>.



# NMR spectroscopic data of **11**

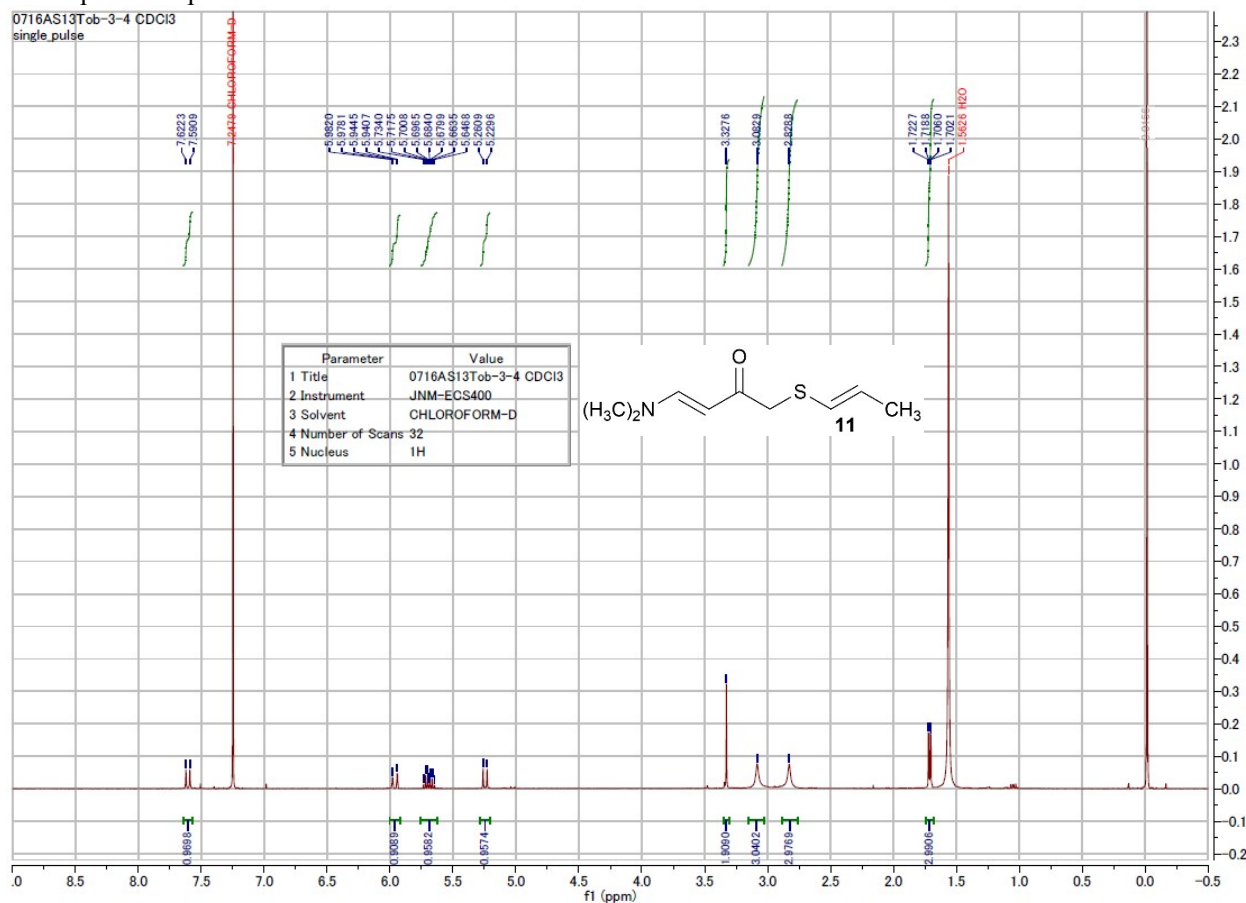

<sup>1</sup>H-NMR (400 MHz) spectroscopic data of **11**. Measured in CDCl<sub>3</sub>.

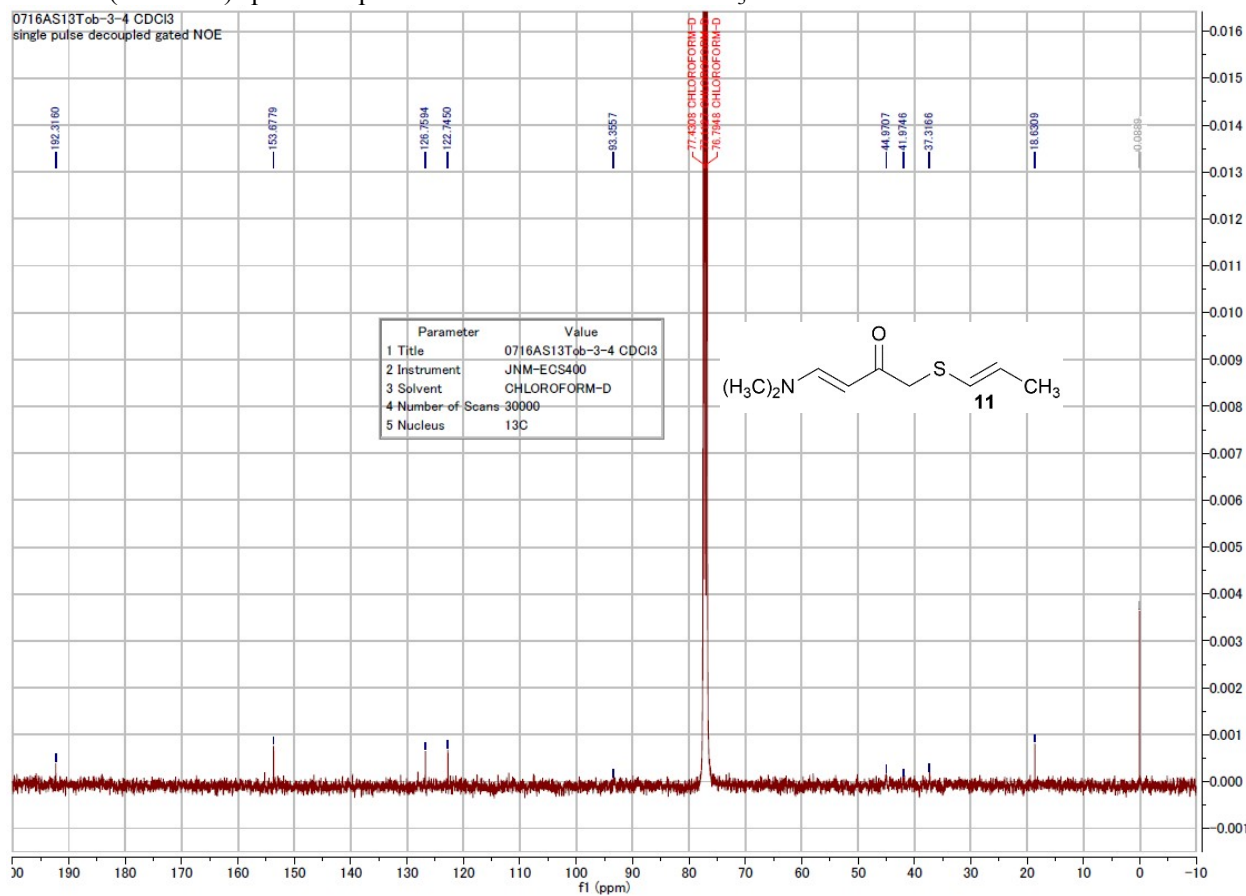

<sup>13</sup>C-NMR (100 MHz) spectroscopic data of **11**. Measured in CDCl<sub>3</sub>.

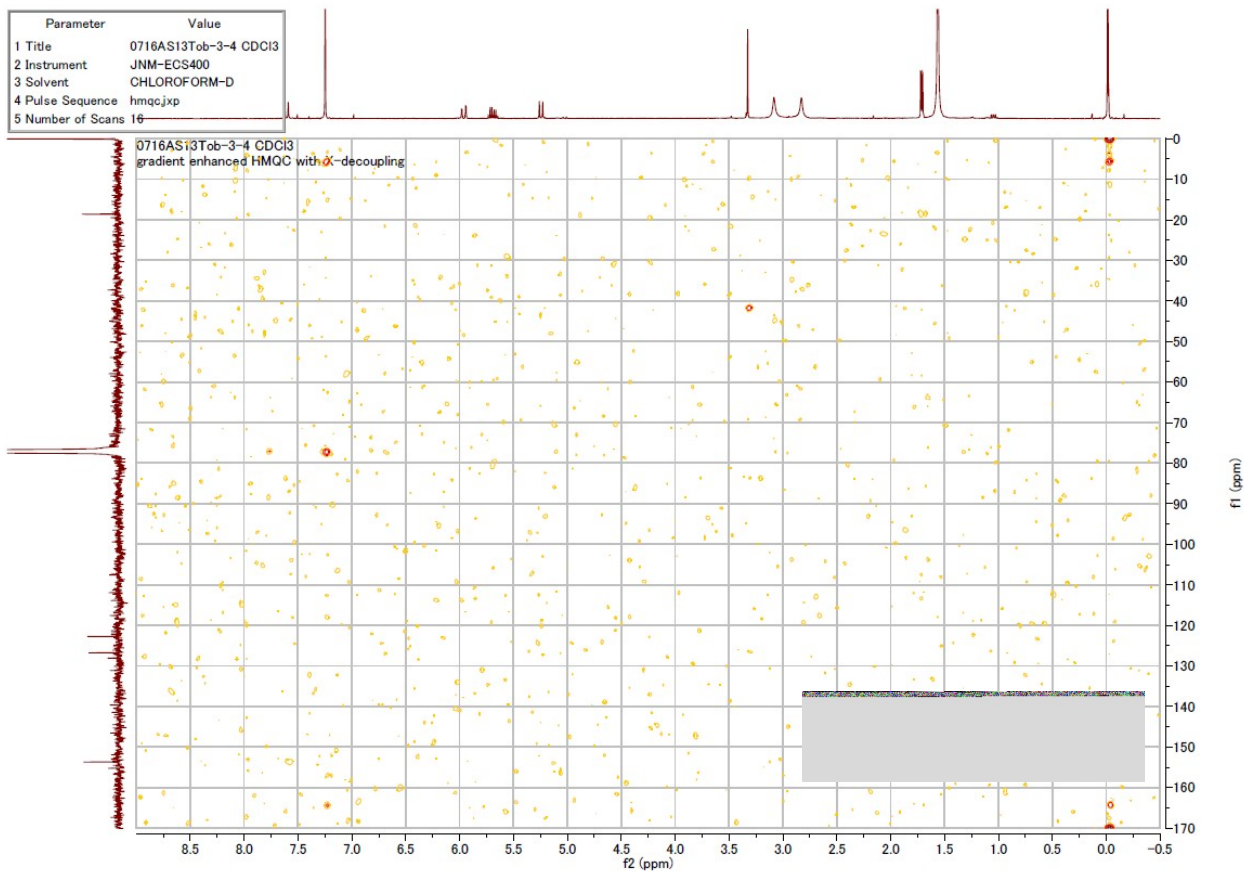

HMQC NMR (400 MHz) spectroscopic data of **11**. Measured in CDCl<sub>3</sub>.

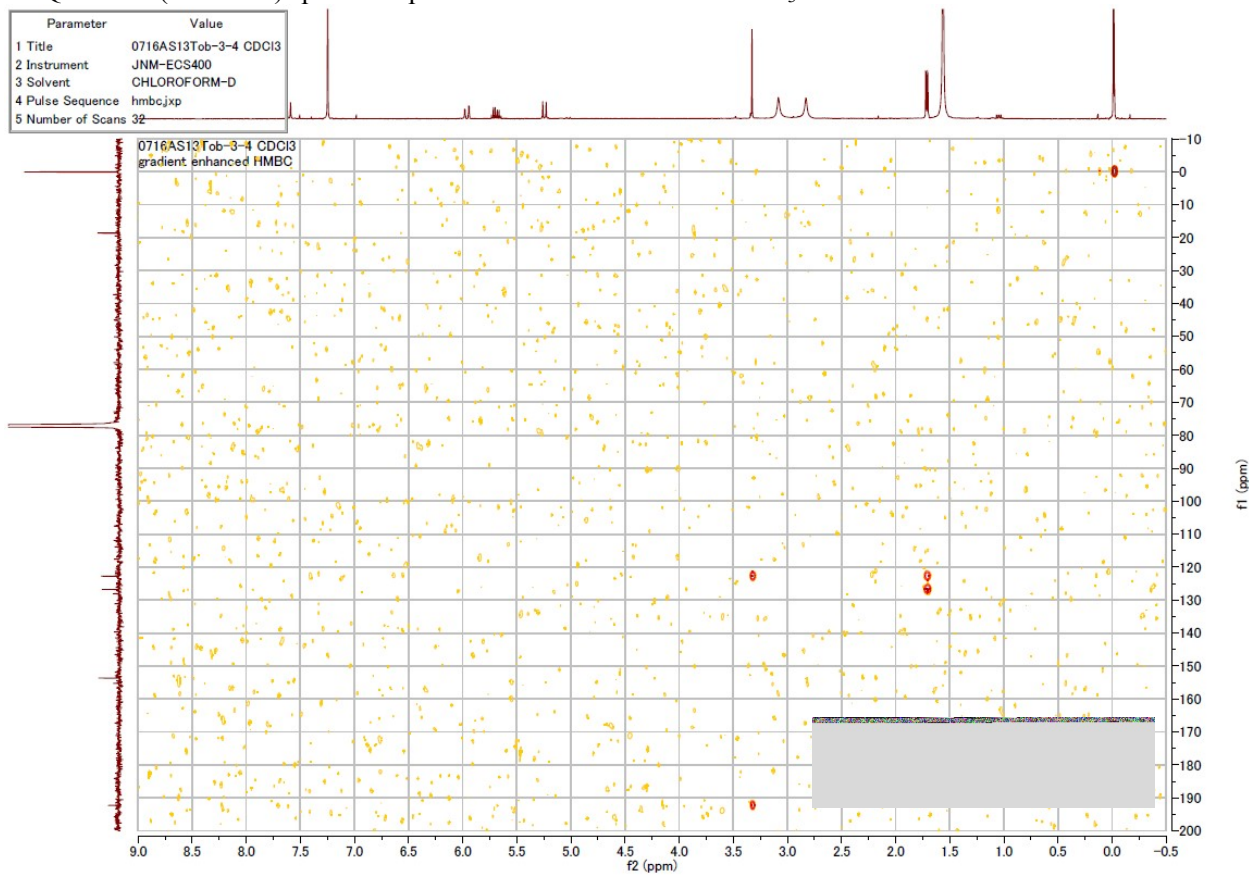

HMBC NMR (400 MHz) spectroscopic data of **11**. Measured in CDCl<sub>3</sub>.

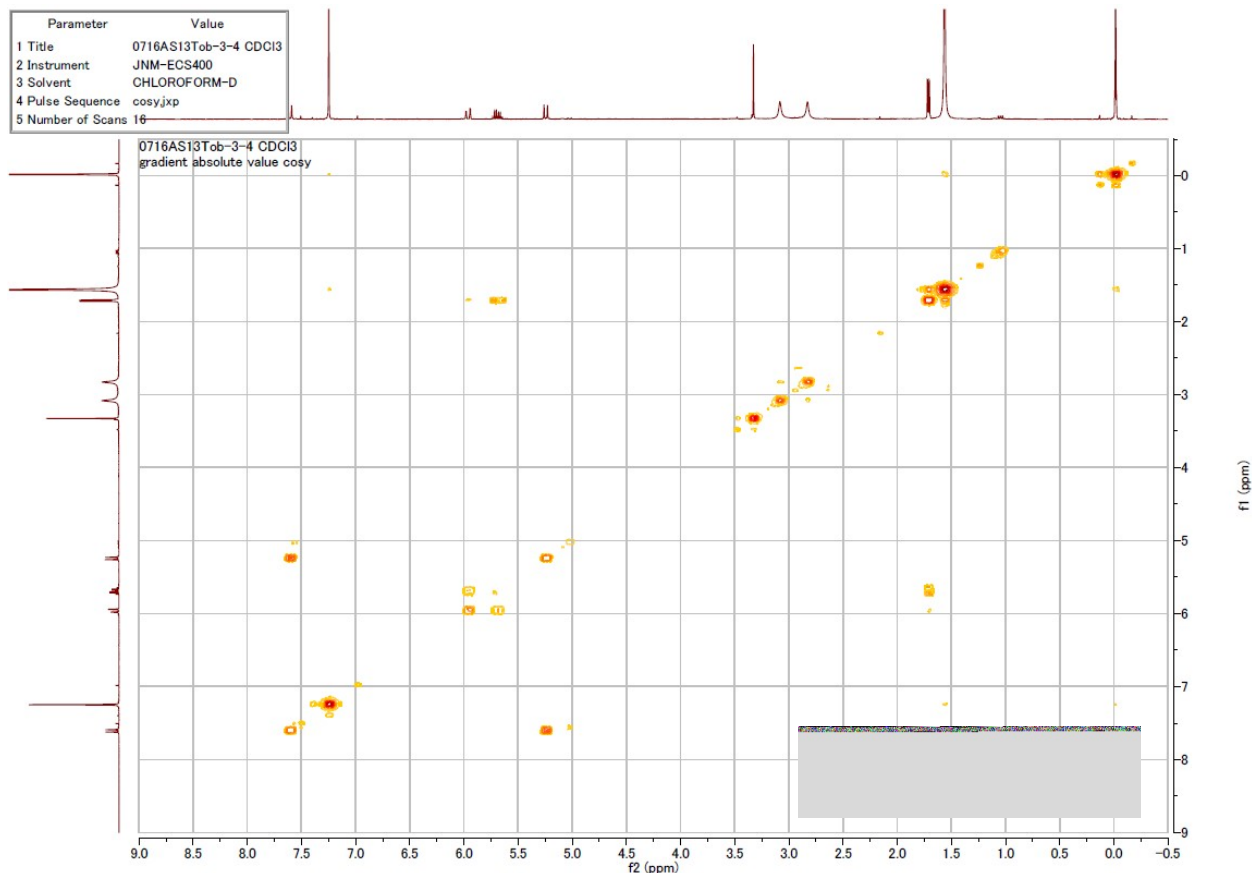

COSY NMR (400 MHz) spectroscopic data of **11**. Measured in CDCl<sub>3</sub>.

NMR spectroscopic data of **12**

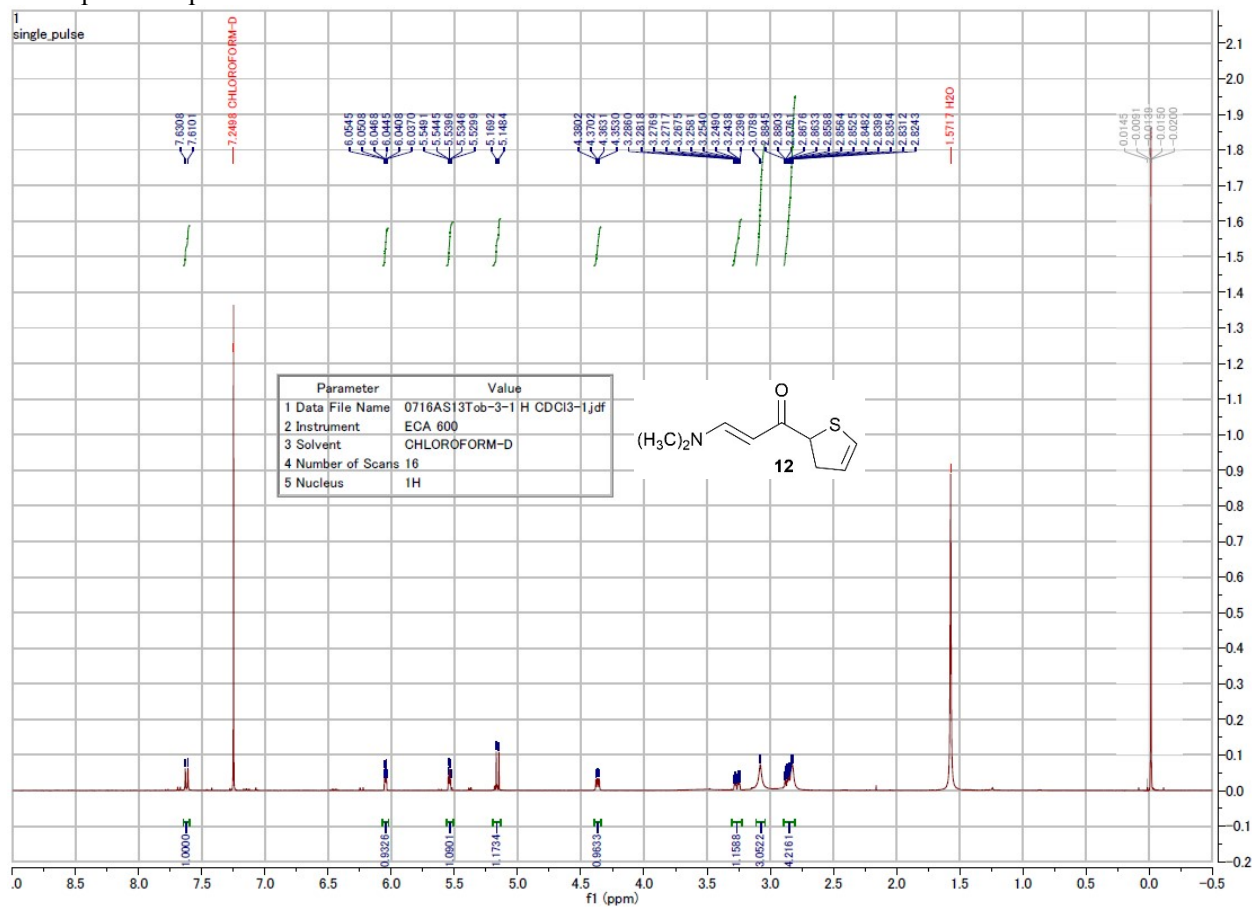

<sup>1</sup>H-NMR (600 MHz) spectroscopic data of **12**. Measured in CDCl<sub>3</sub>.



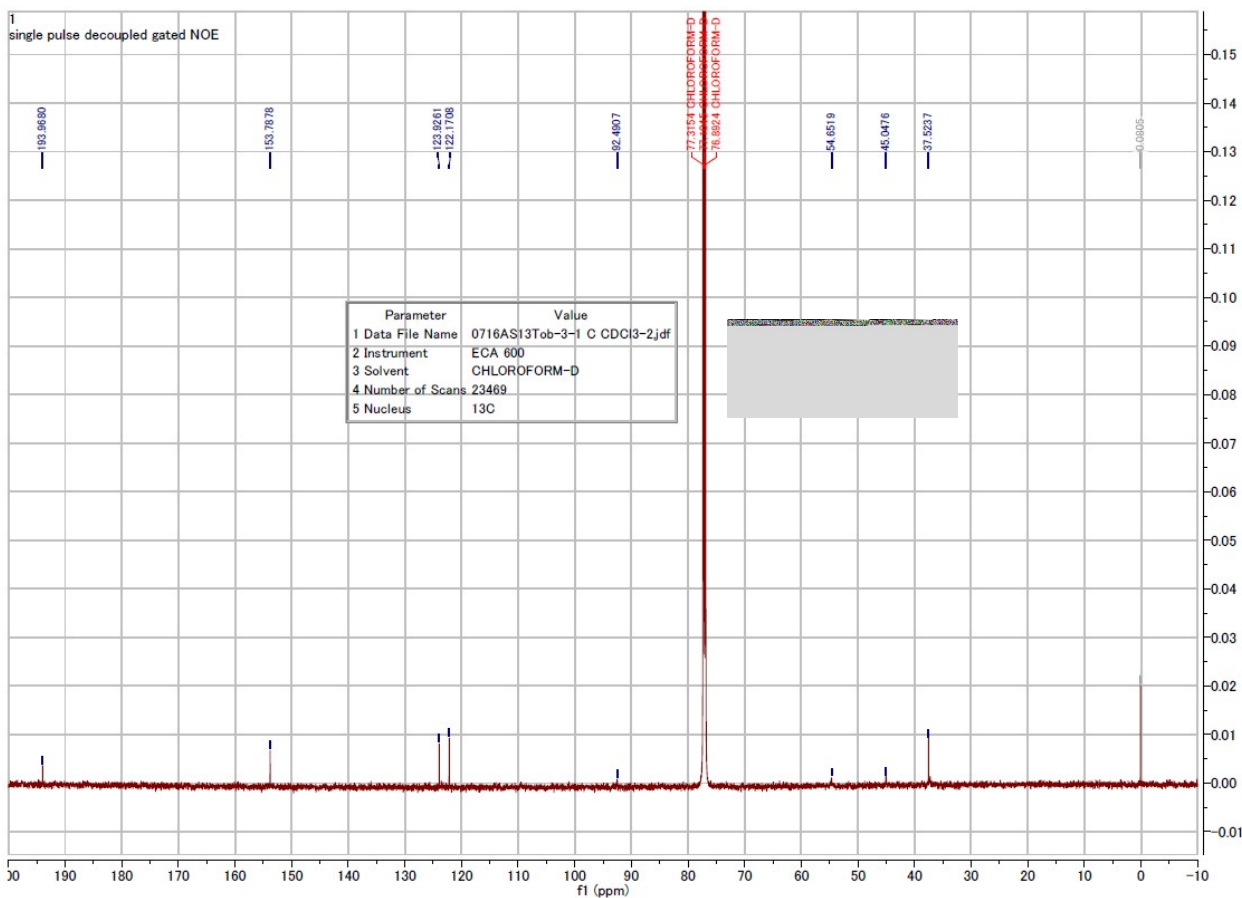

$^{13}\text{C}$ -NMR (150 MHz) spectroscopic data of **12**. Measured in  $\text{CDCl}_3$ .

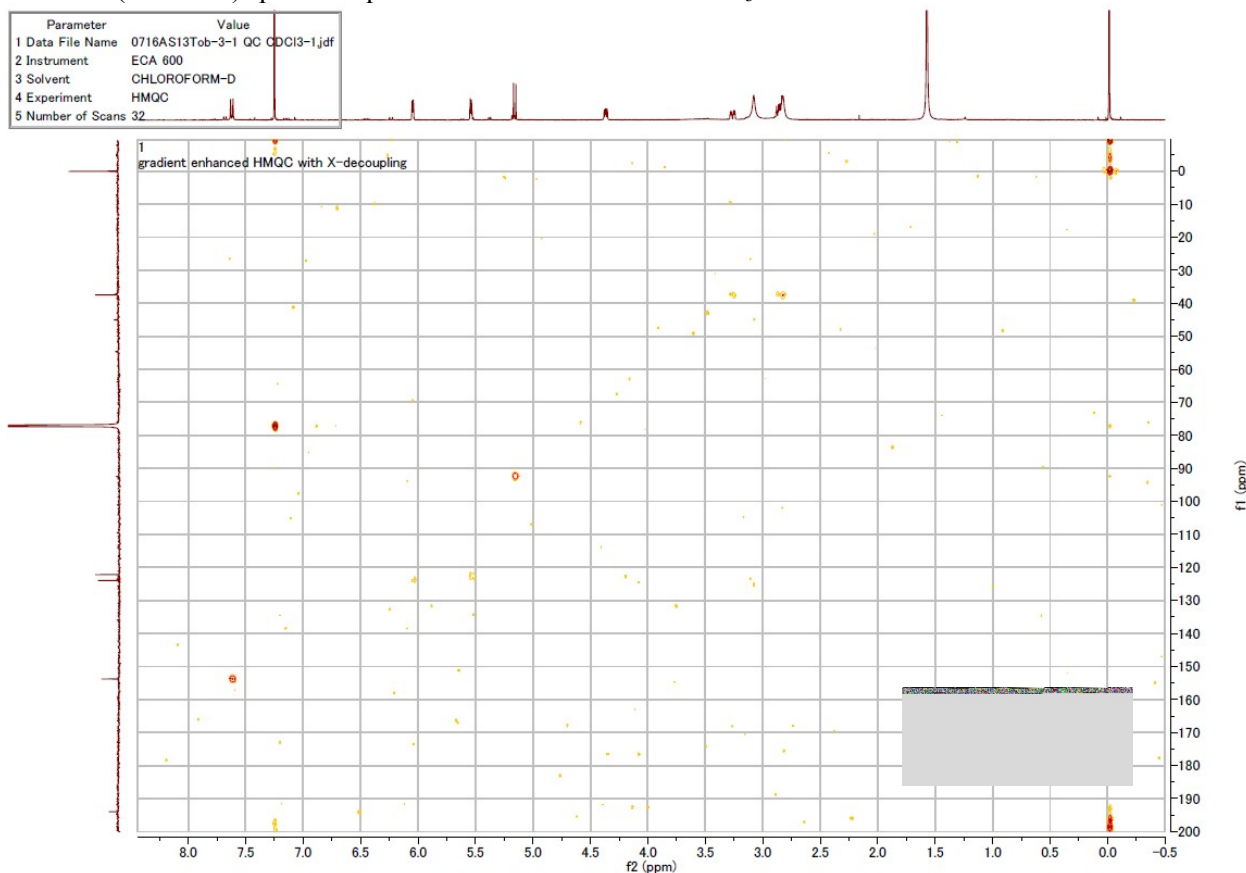

HMQC NMR (600 MHz) spectroscopic data of **12**. Measured in  $\text{CDCl}_3$ .

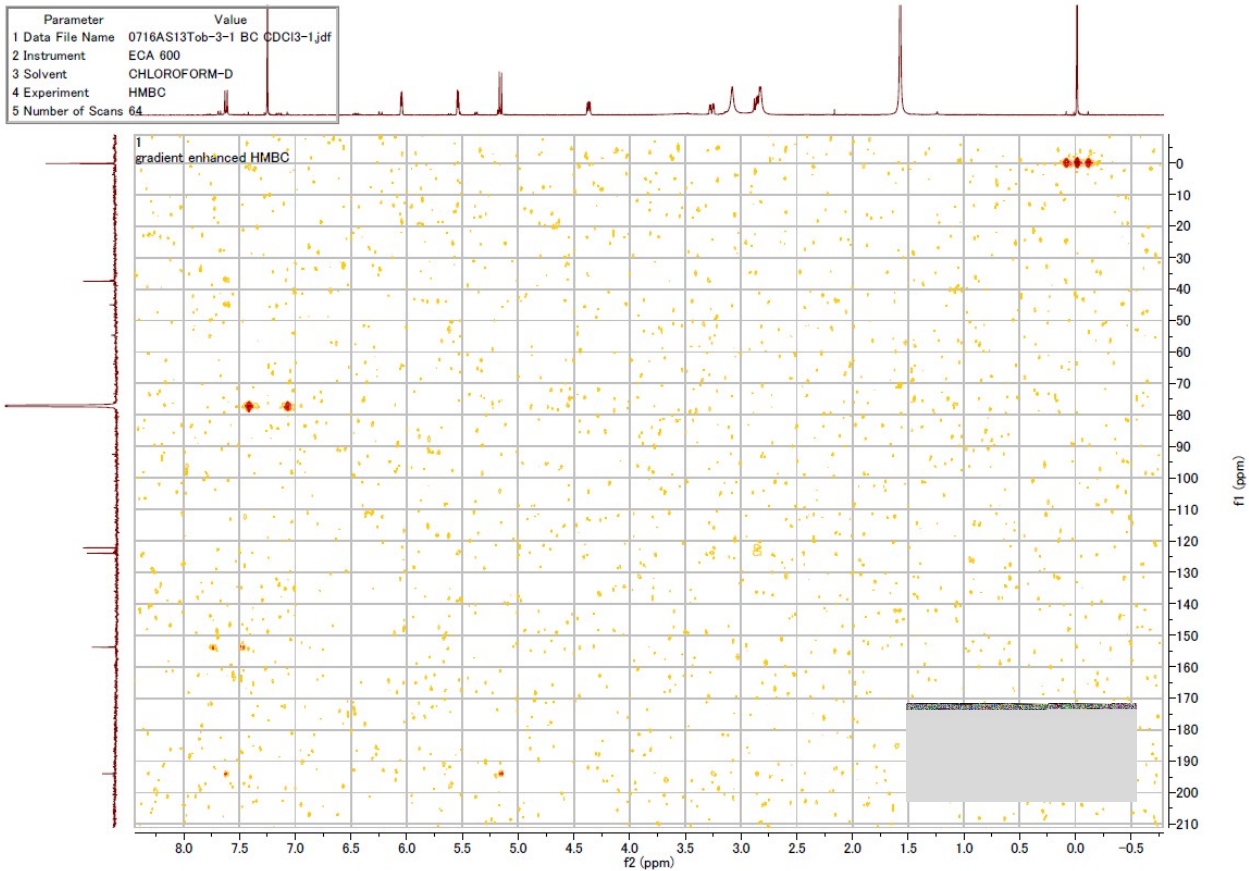

HMBC NMR (600 MHz) spectroscopic data of **12**. Measured in  $\text{CDCl}_3$ .

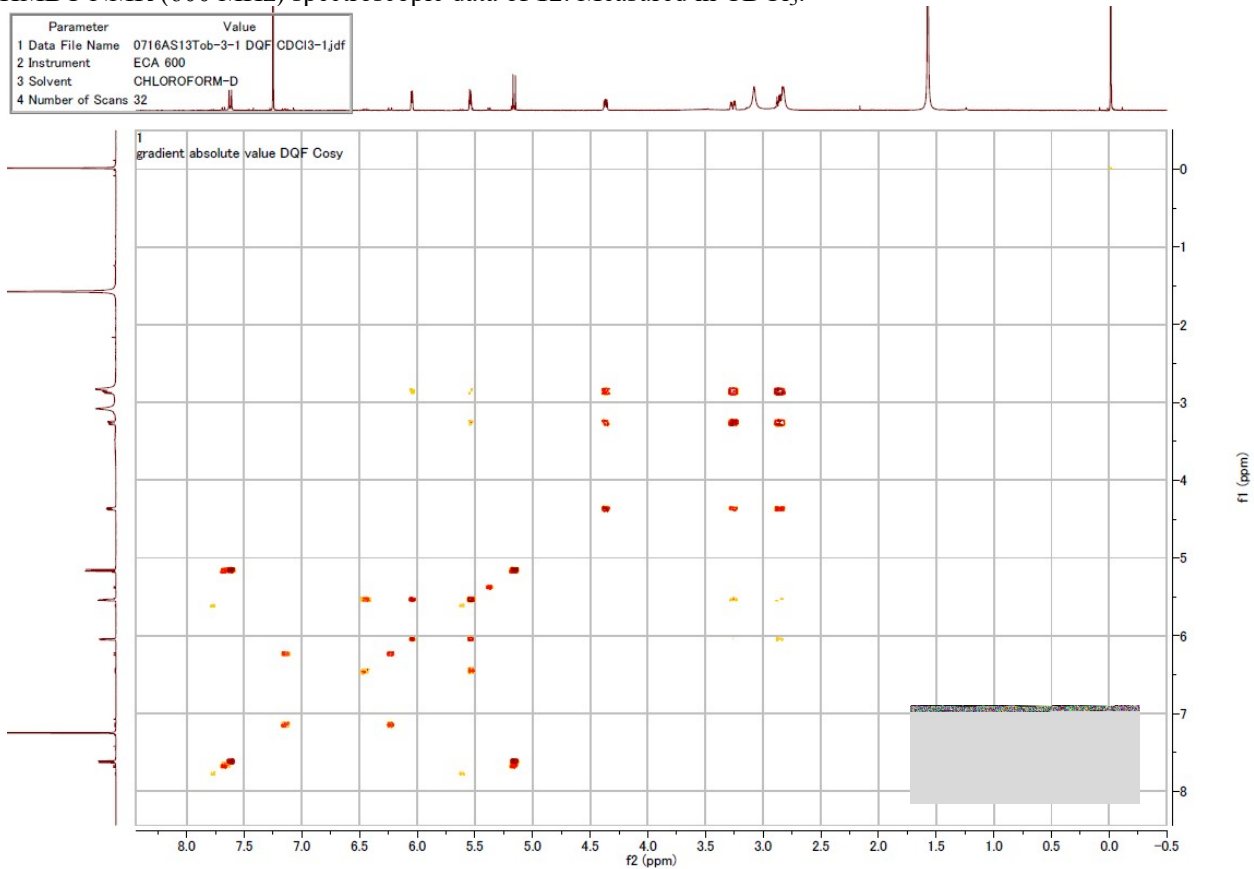

COSY NMR (600 MHz) spectroscopic data of **12**. Measured in  $\text{CDCl}_3$ .

# NMR spectroscopic data of 13

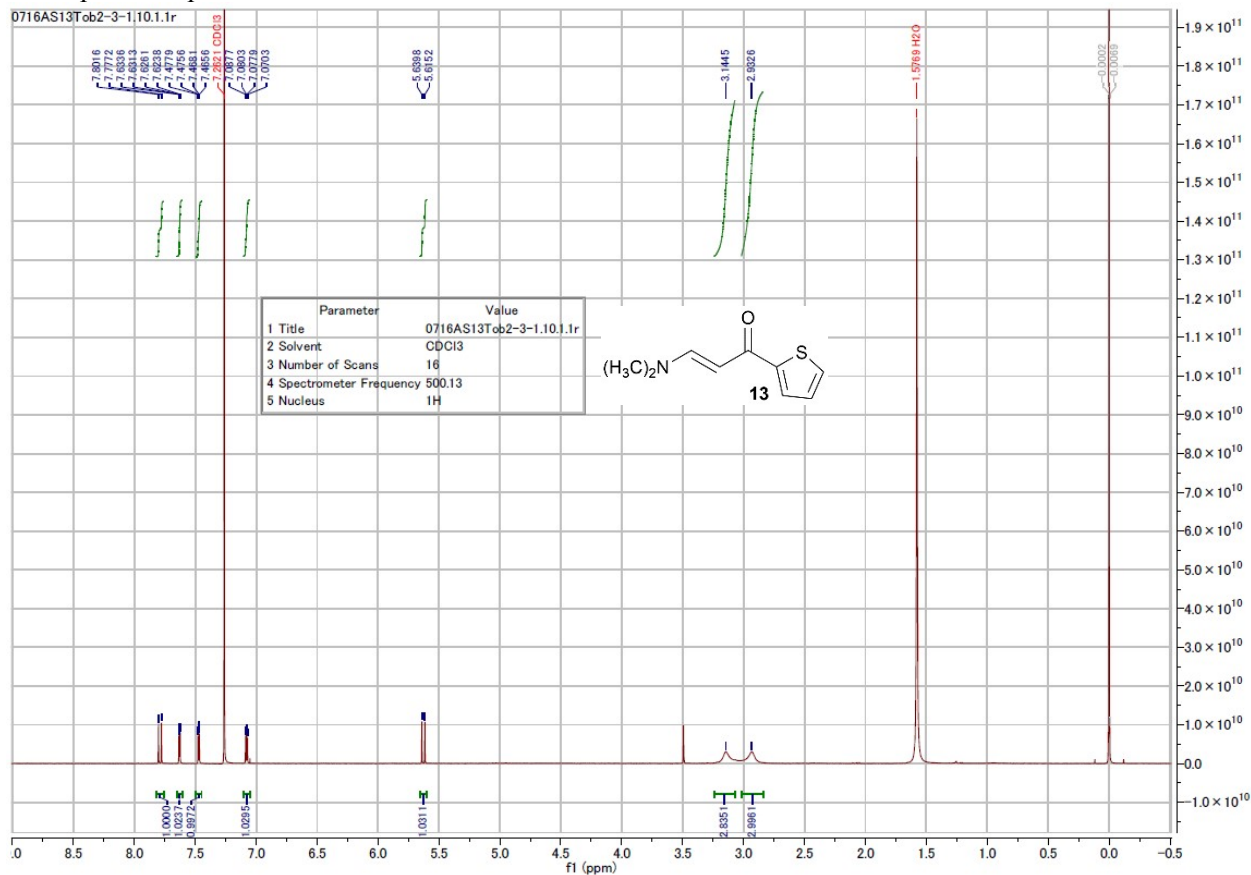

<sup>1</sup>H-NMR (500 MHz) spectroscopic data of 13. Measured in CDCl<sub>3</sub>.

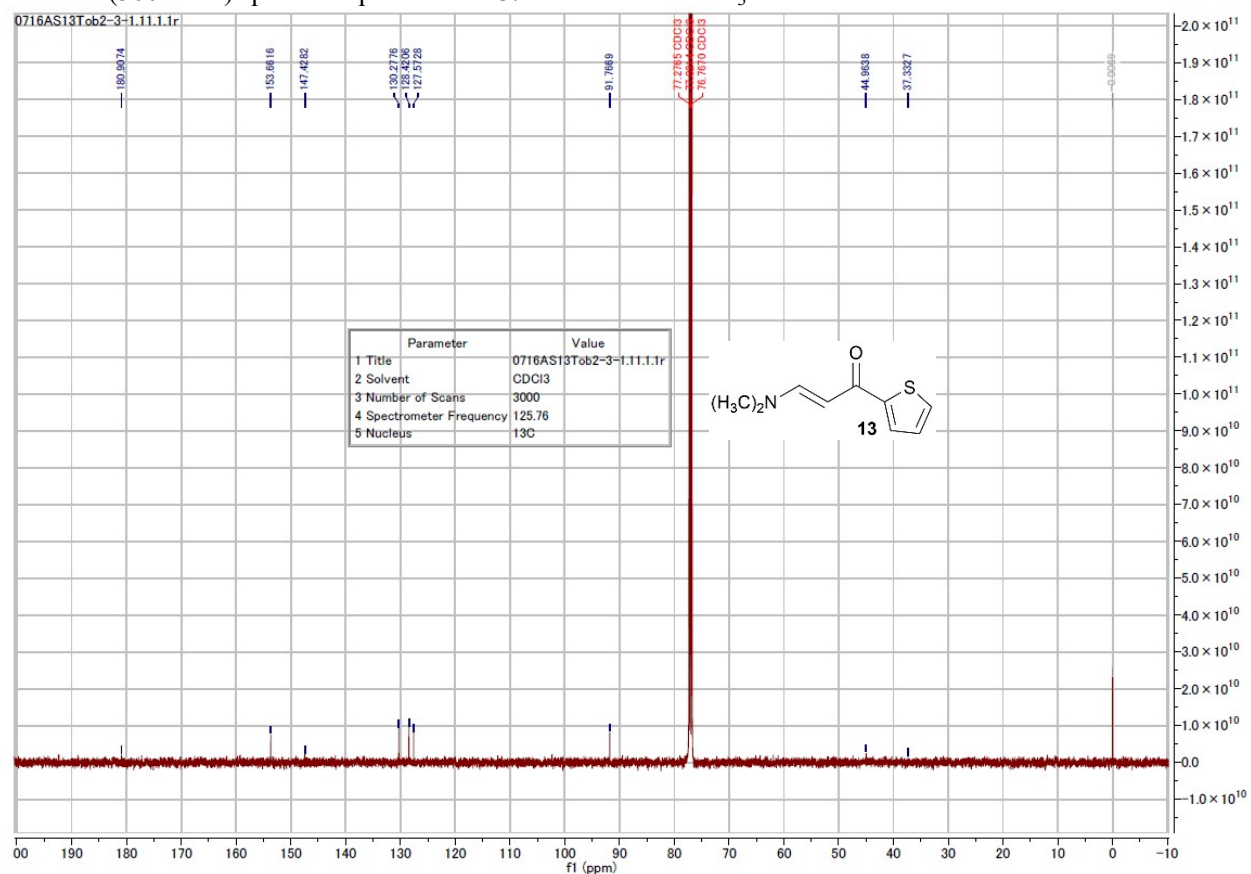

<sup>13</sup>C-NMR (125 MHz) spectroscopic data of 13. Measured in CDCl<sub>3</sub>.

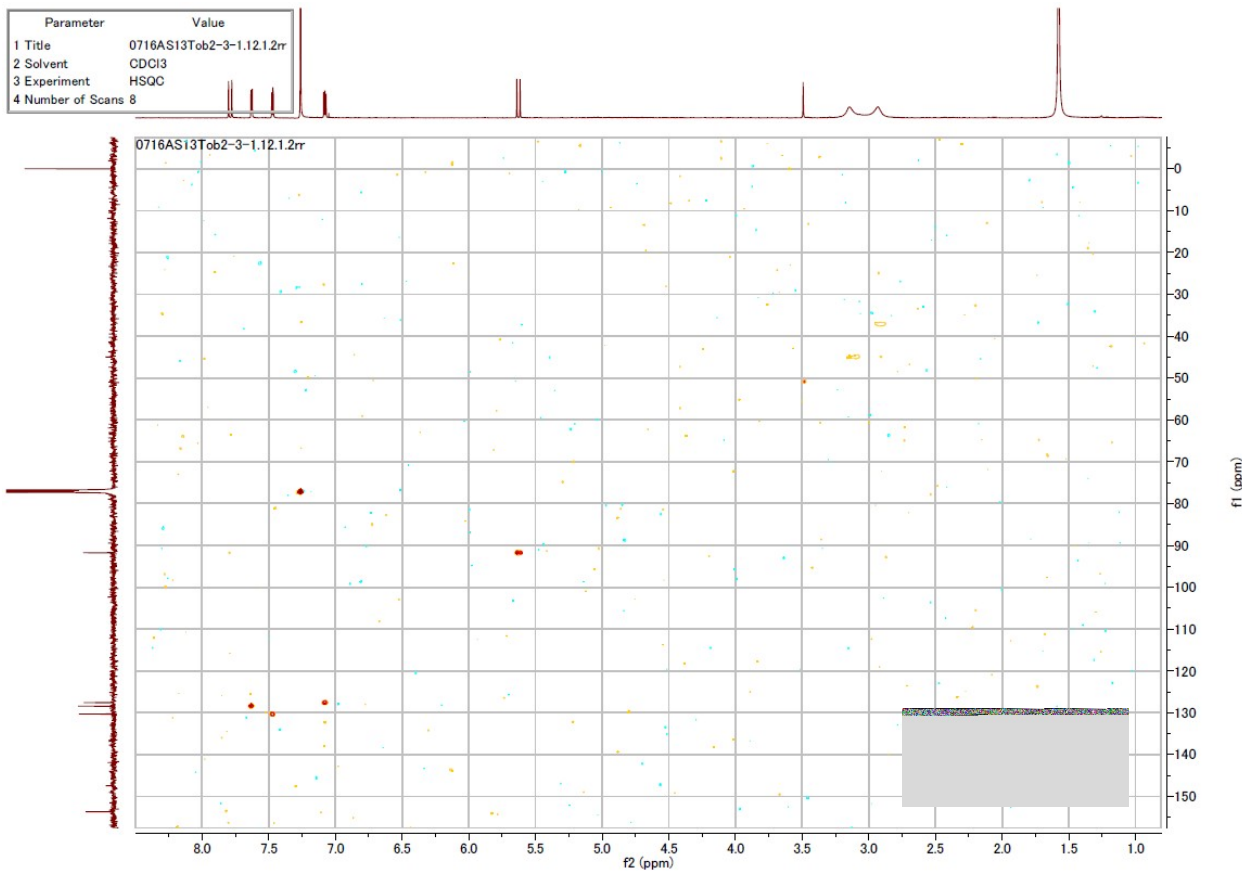

HMQC NMR (500 MHz) spectroscopic data of **13**. Measured in CDCl<sub>3</sub>.

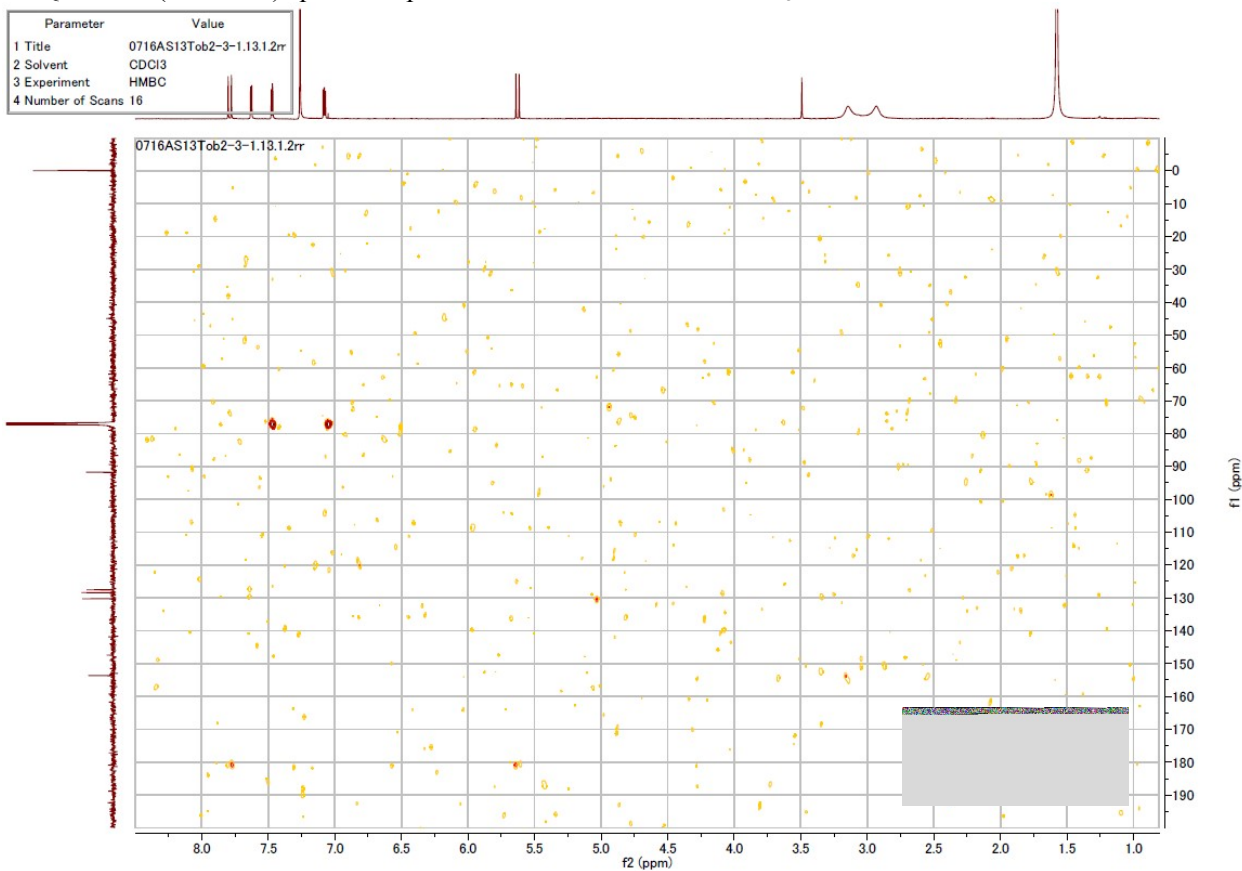

HMBC NMR (500 MHz) spectroscopic data of **13**. Measured in CDCl<sub>3</sub>.

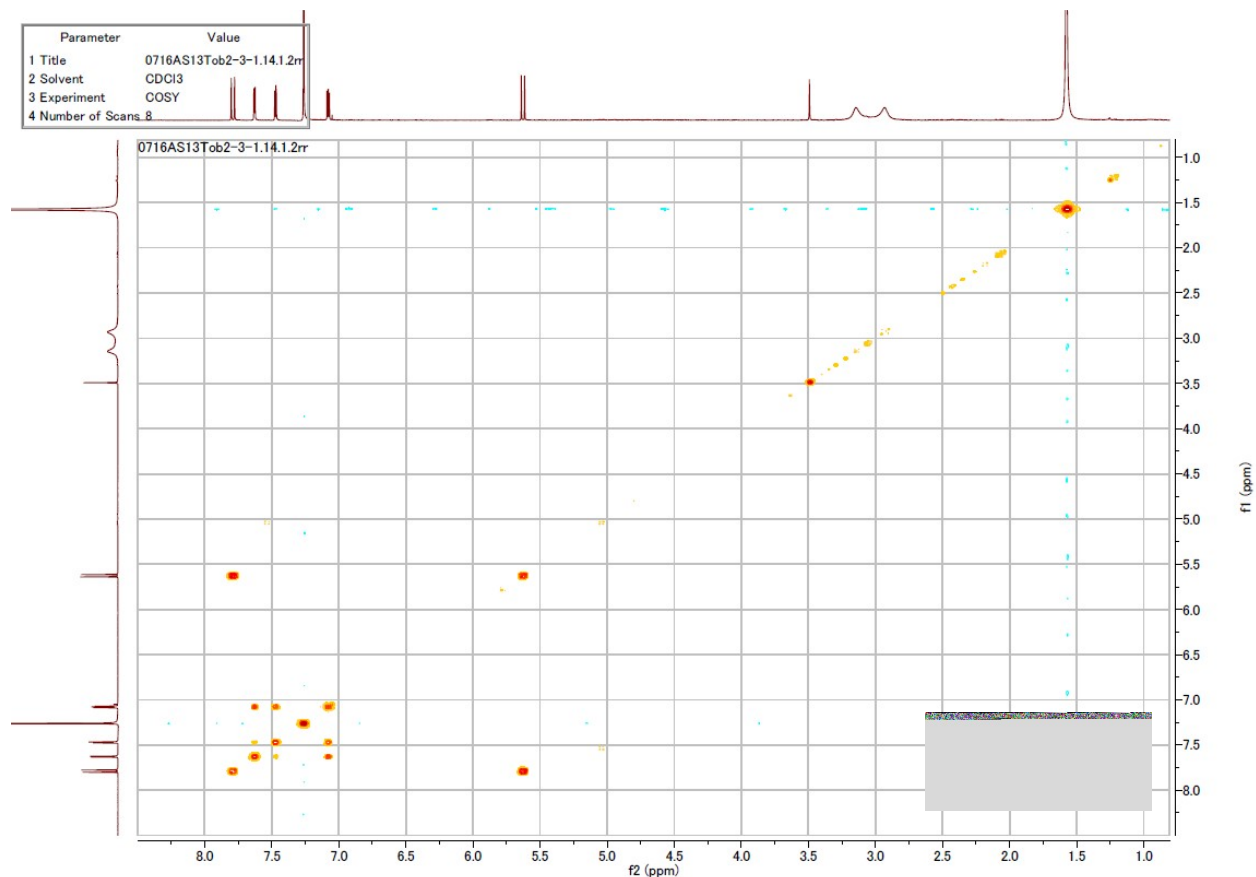

COSY NMR (500 MHz) spectroscopic data of **13**. Measured in CDCl<sub>3</sub>.

NMR spectroscopic data of **14**

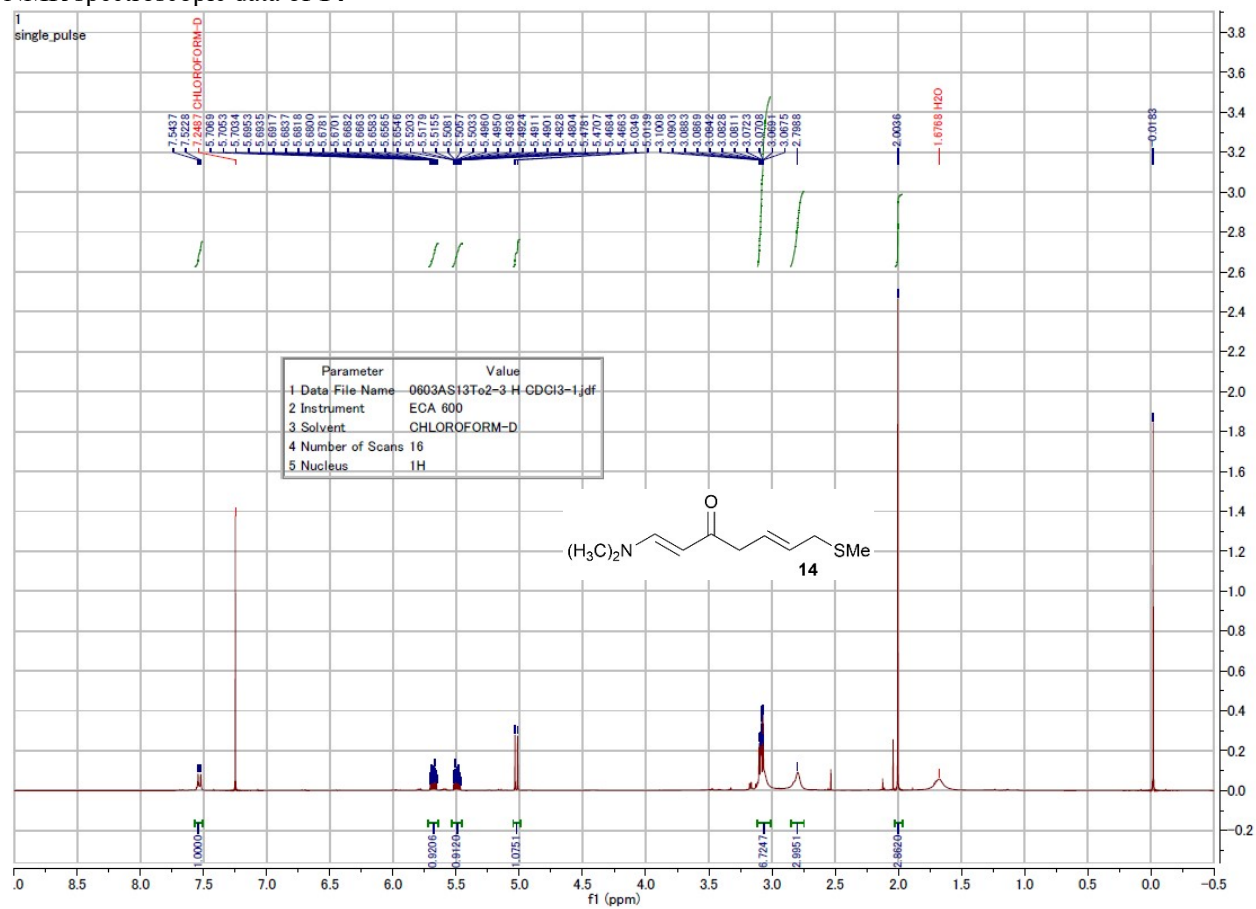

<sup>1</sup>H-NMR (600 MHz) spectroscopic data of **14**. Measured in CDCl<sub>3</sub>.



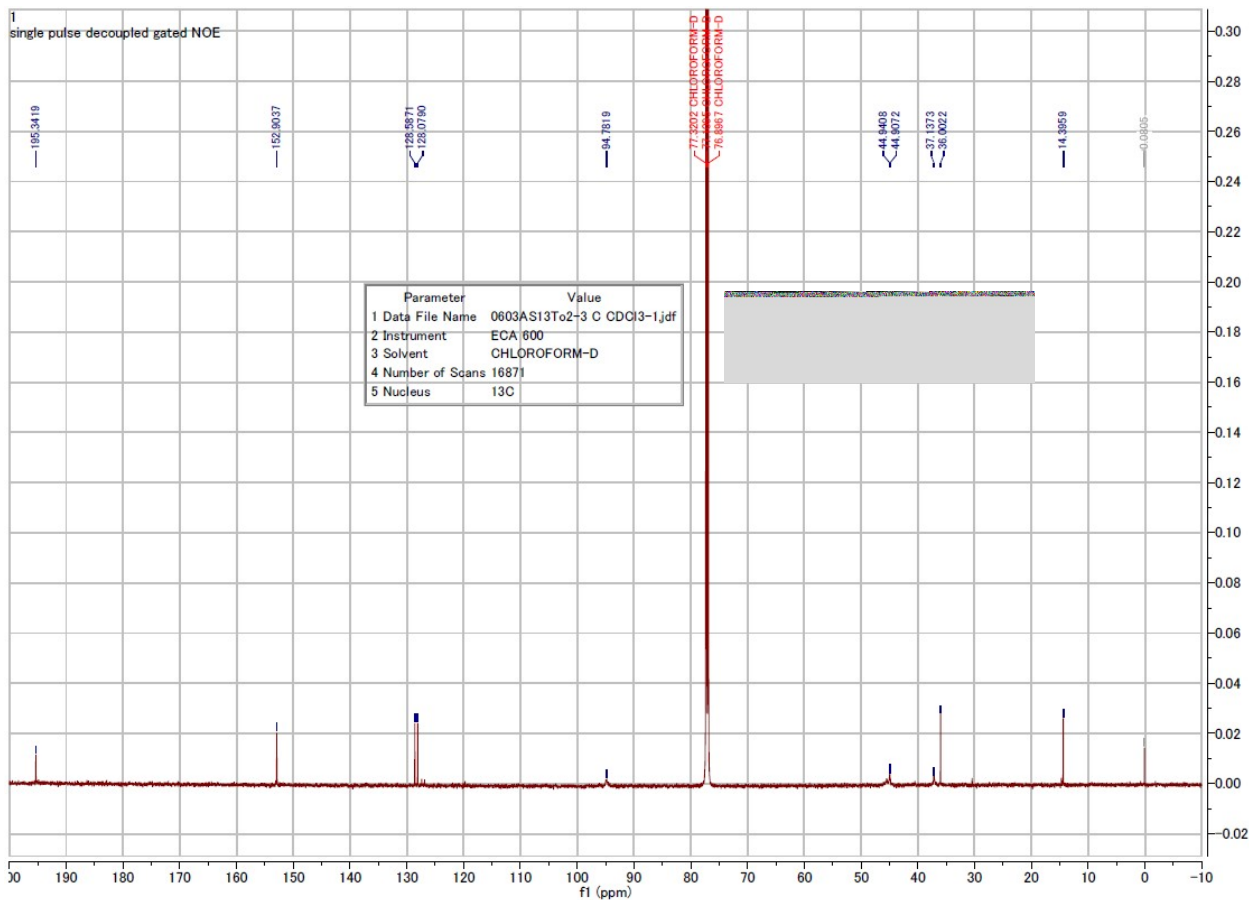

$^{13}\text{C}$ -NMR (150 MHz) spectroscopic data of **14**. Measured in  $\text{CDCl}_3$ .

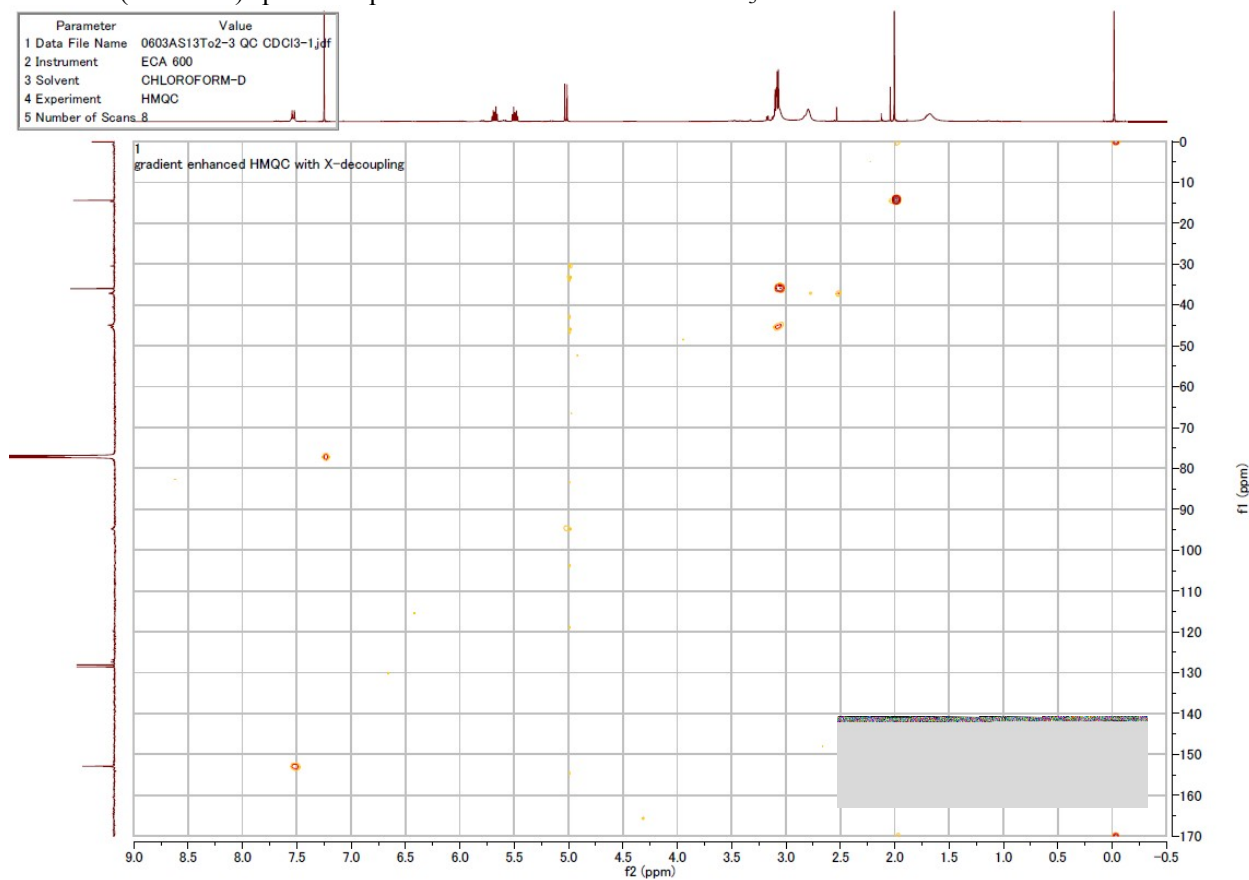

HMQC NMR (600 MHz) spectroscopic data of **14**. Measured in  $\text{CDCl}_3$ .

| Parameter         | Value                        |
|-------------------|------------------------------|
| 1 Data File Name  | 0603AS13To2-3 BC CDCl3-1.jdf |
| 2 Instrument      | ECA 600                      |
| 3 Solvent         | CHLOROFORM-D                 |
| 4 Experiment      | HMBC                         |
| 5 Number of Scans | 16                           |

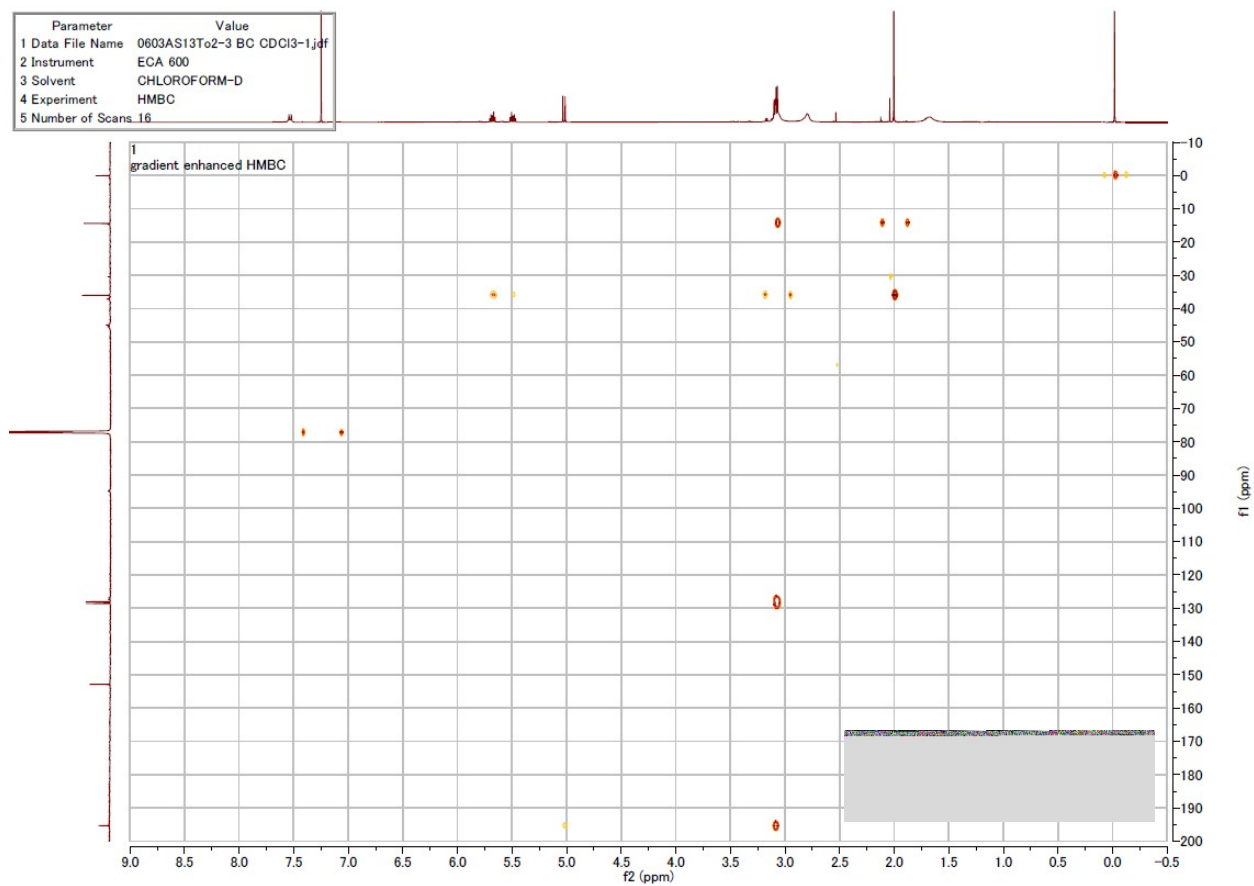

HMBC NMR (600 MHz) spectroscopic data of **14**. Measured in  $\text{CDCl}_3$ .

| Parameter         | Value                         |
|-------------------|-------------------------------|
| 1 Data File Name  | 0603AS13To2-3 DQF CDCl3-1.jdf |
| 2 Instrument      | ECA 600                       |
| 3 Solvent         | CHLOROFORM-D                  |
| 4 Number of Scans | 8                             |

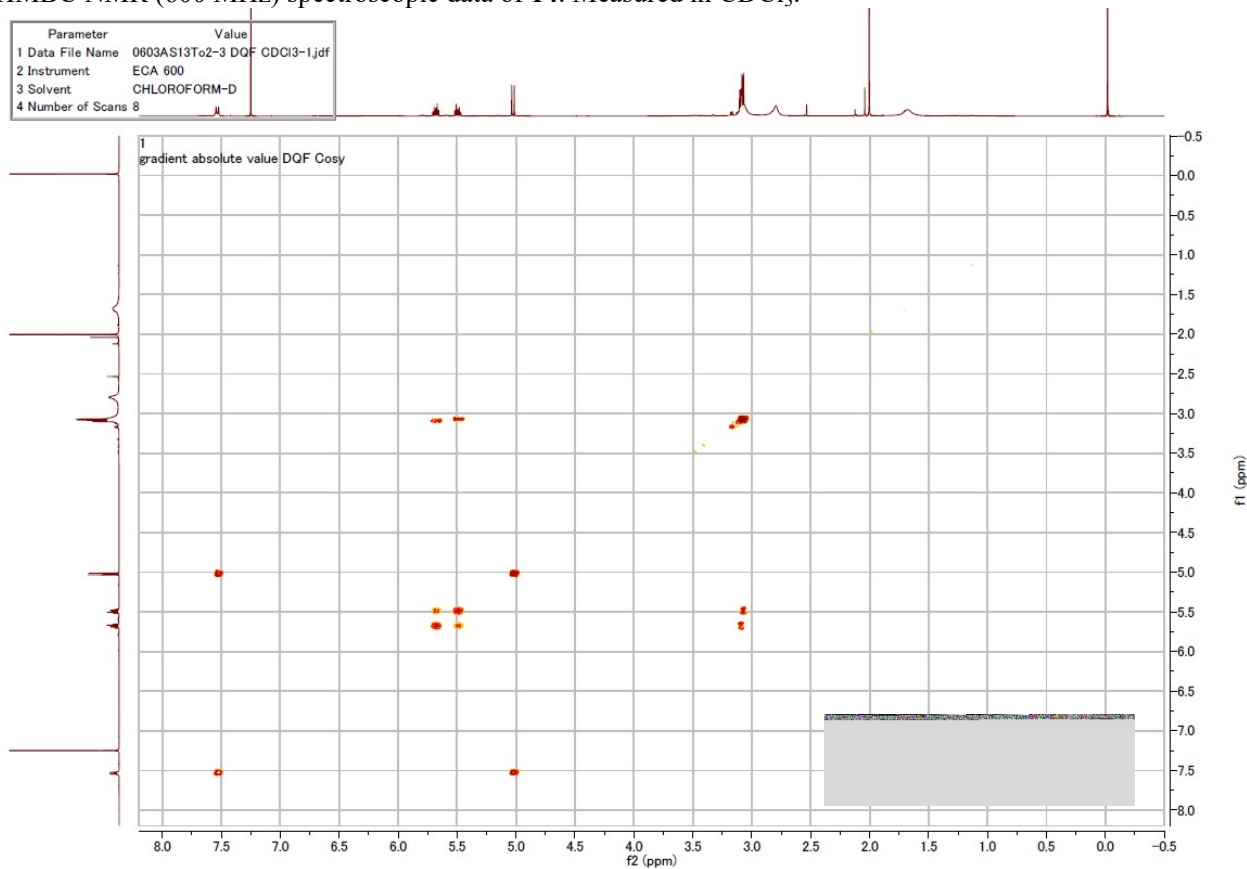

COSY NMR (600 MHz) spectroscopic data of **14**. Measured in  $\text{CDCl}_3$ .

# NMR spectroscopic data of 15

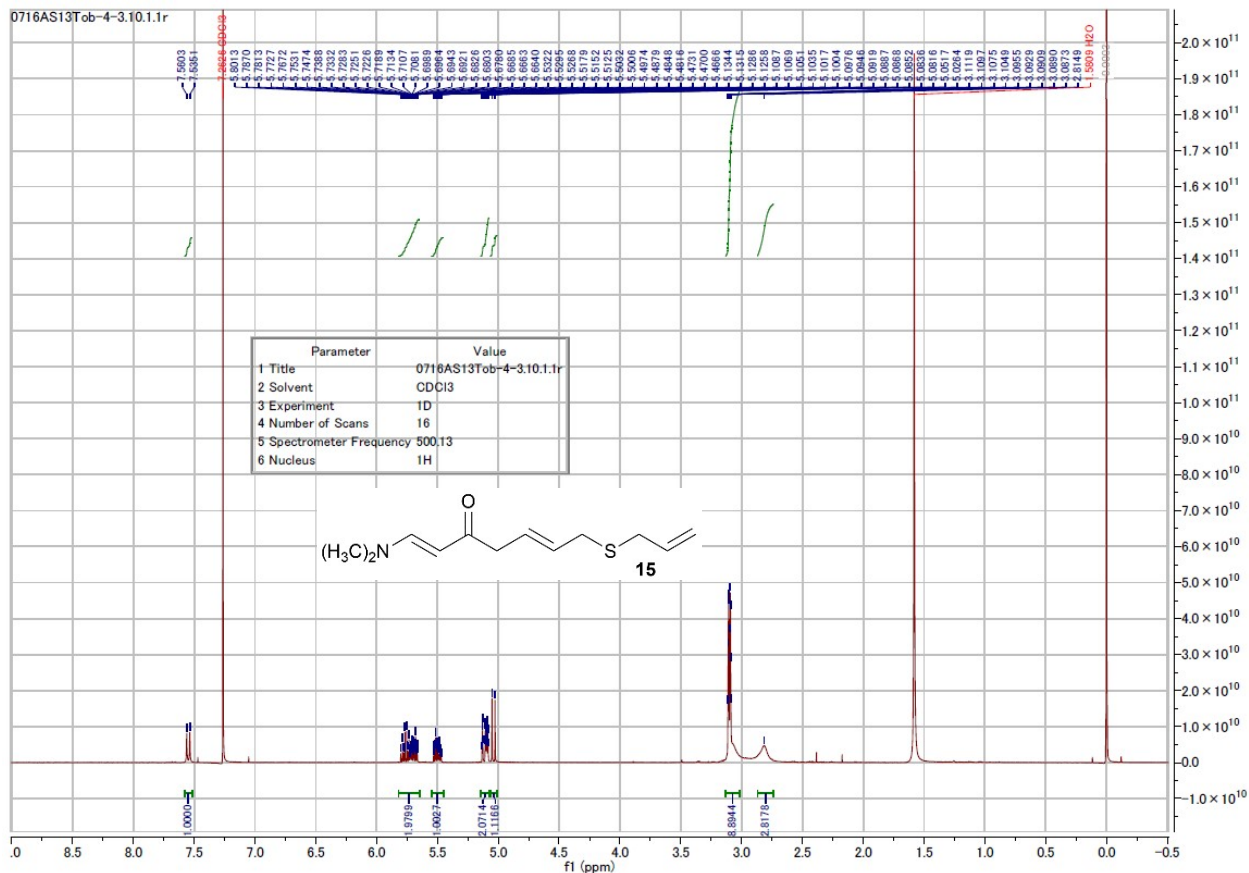

<sup>1</sup>H-NMR (500 MHz) spectroscopic data of 15. Measured in CDCl<sub>3</sub>.

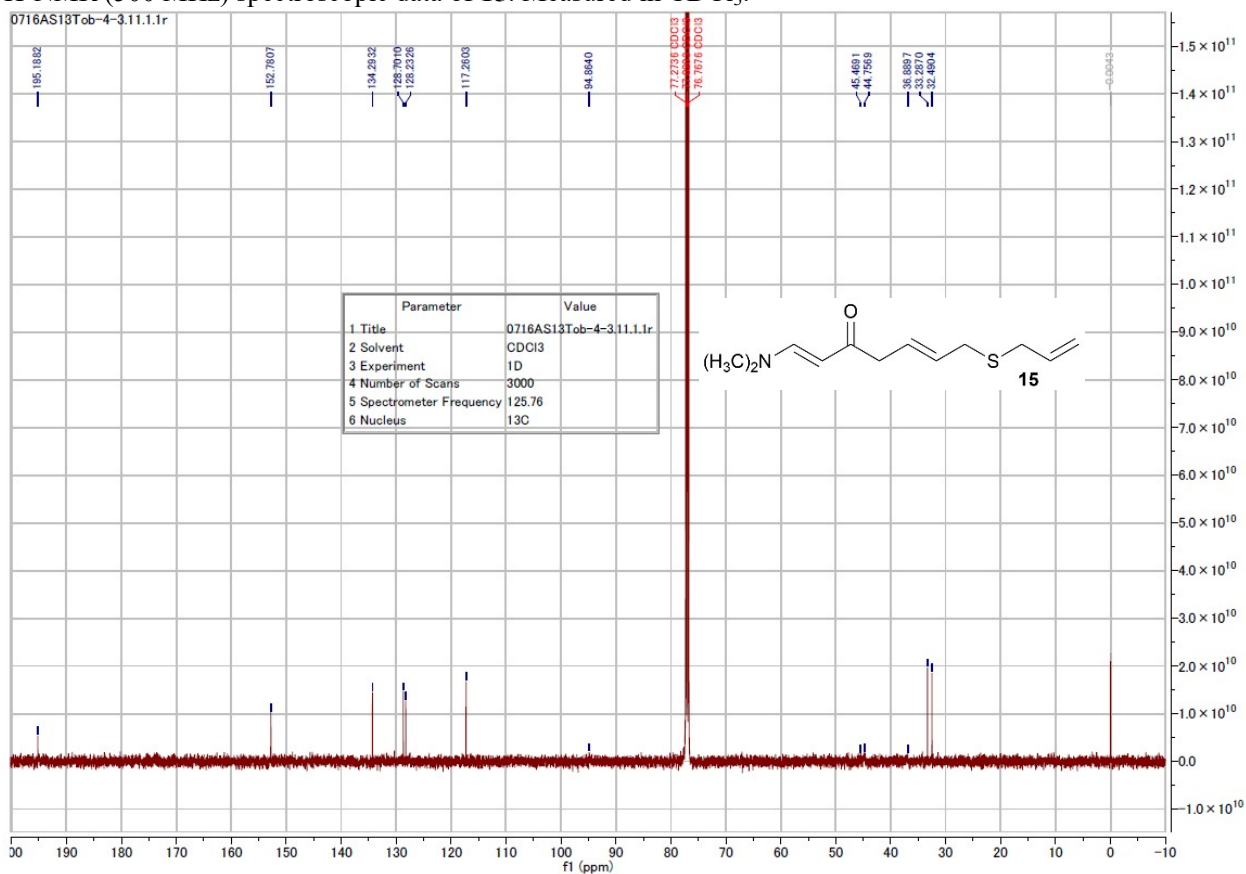

<sup>13</sup>C-NMR (125 MHz) spectroscopic data of 15. Measured in CDCl<sub>3</sub>.



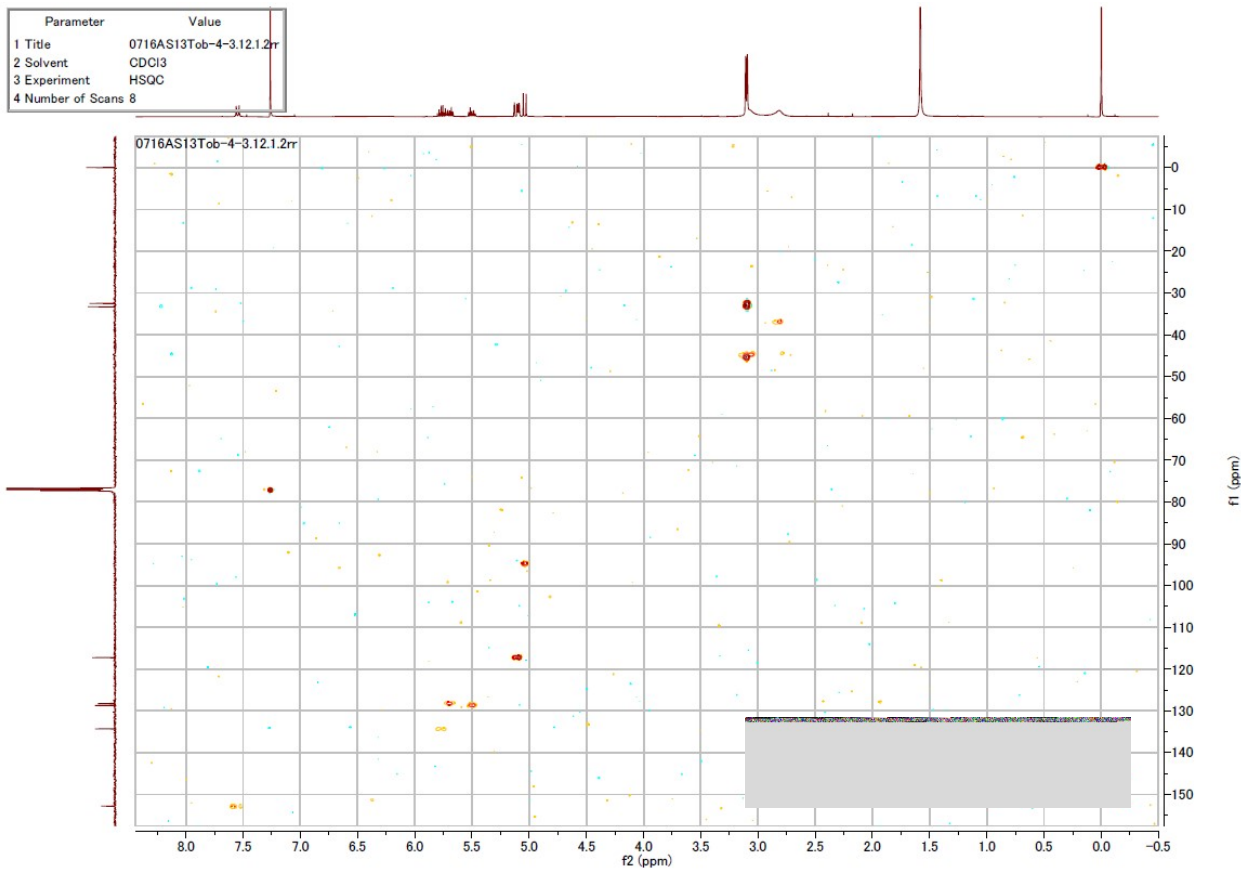

HMQC NMR (500 MHz) spectroscopic data of **15**. Measured in CDCl<sub>3</sub>.

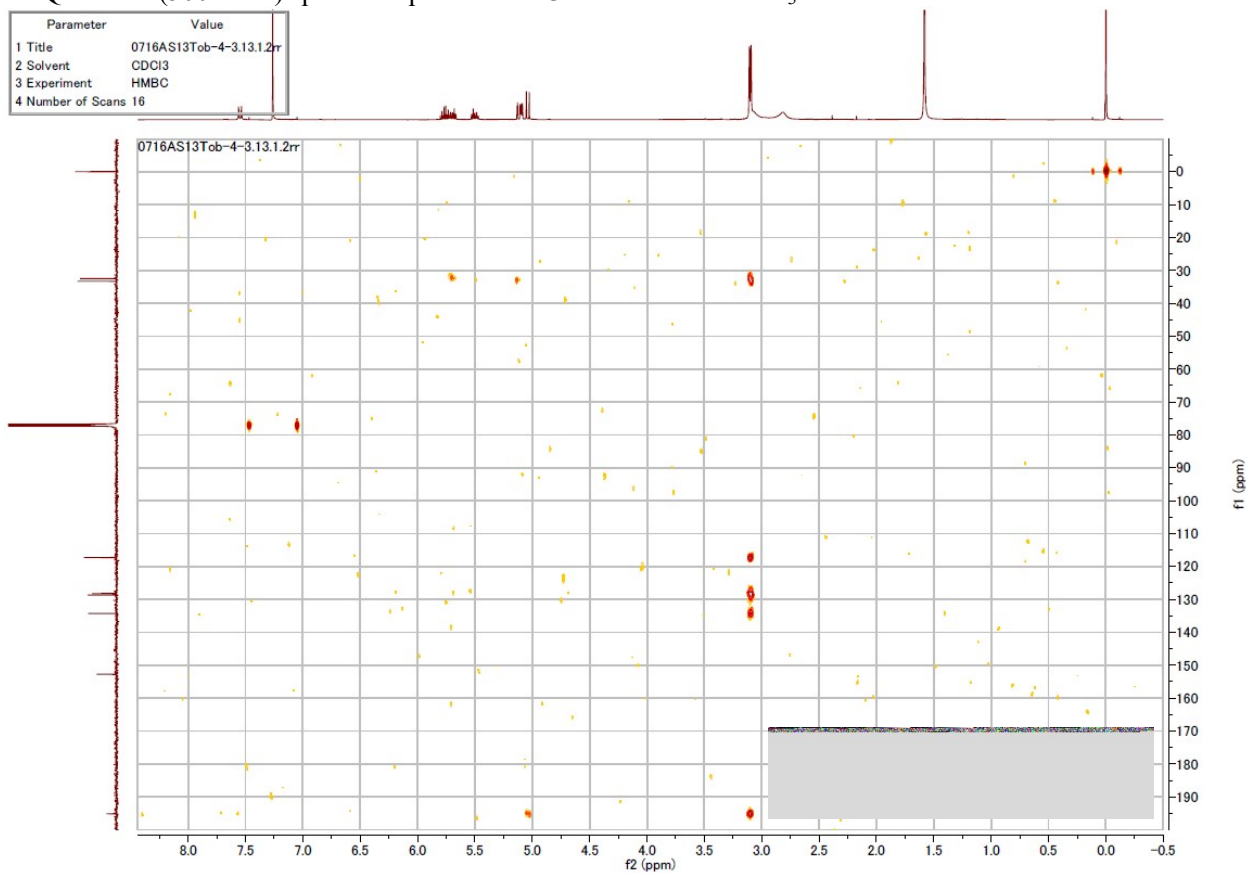

HMBC NMR (500 MHz) spectroscopic data of **15**. Measured in CDCl<sub>3</sub>.

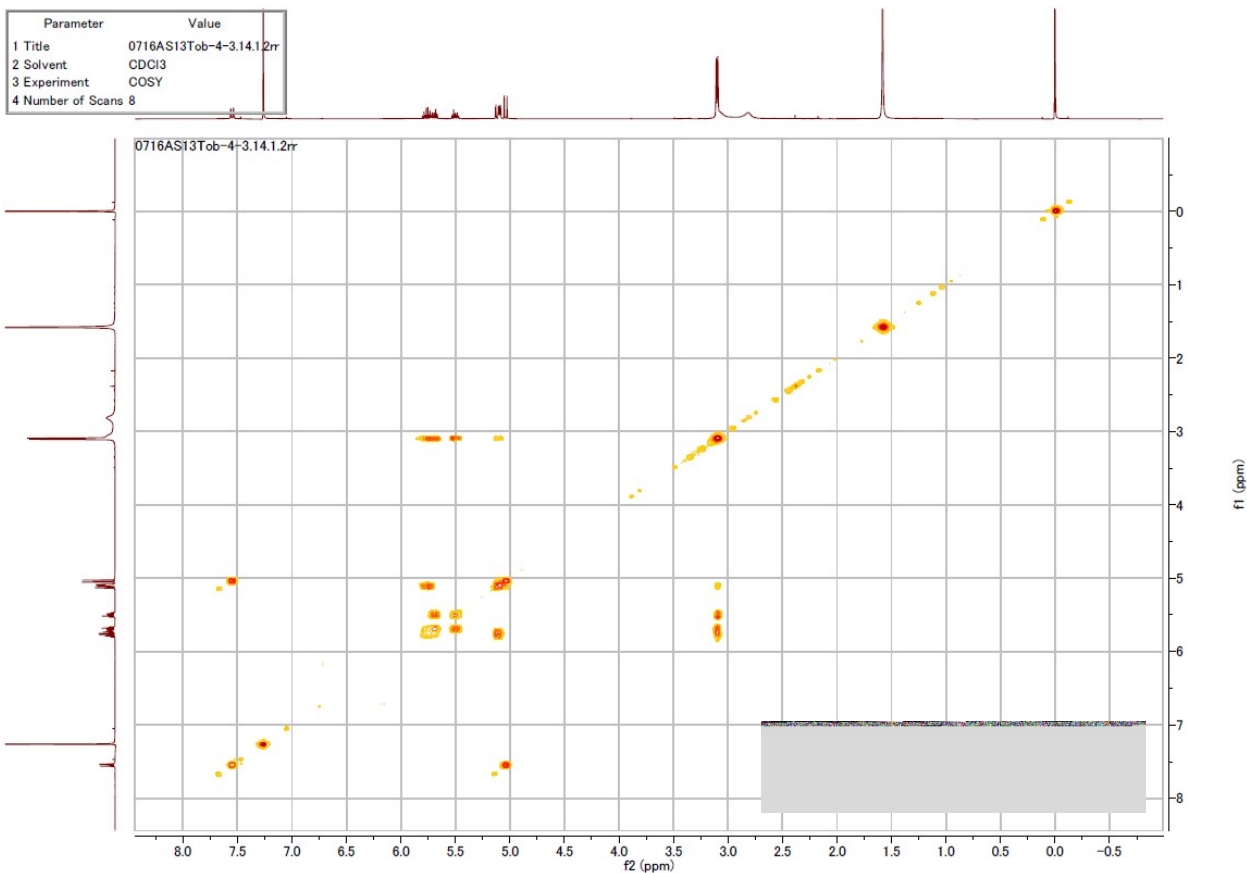

COSY NMR (500 MHz) spectroscopic data of **15**. Measured in CDCl<sub>3</sub>.

NMR spectroscopic data of **16**

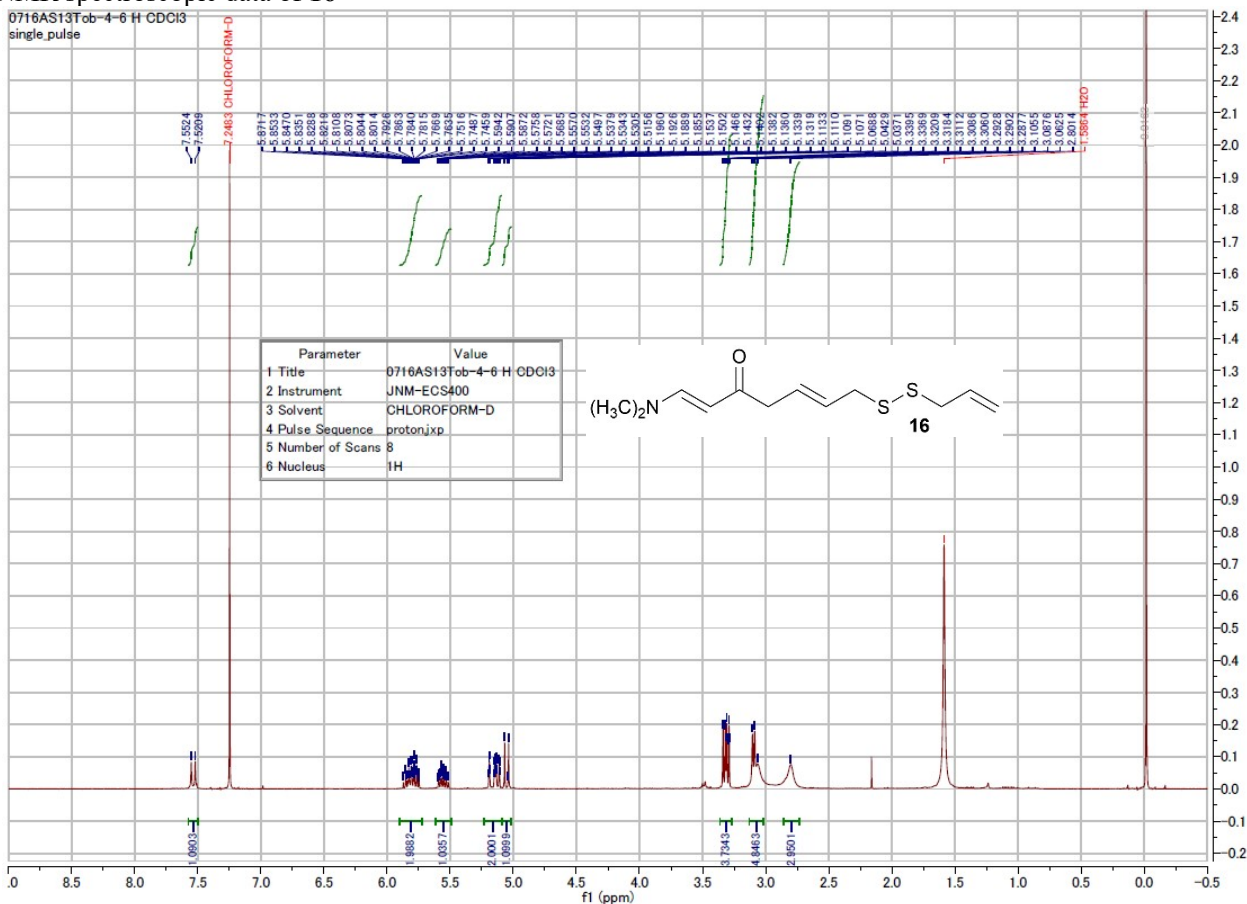

<sup>1</sup>H-NMR (400 MHz) spectroscopic data of **16**. Measured in CDCl<sub>3</sub>.

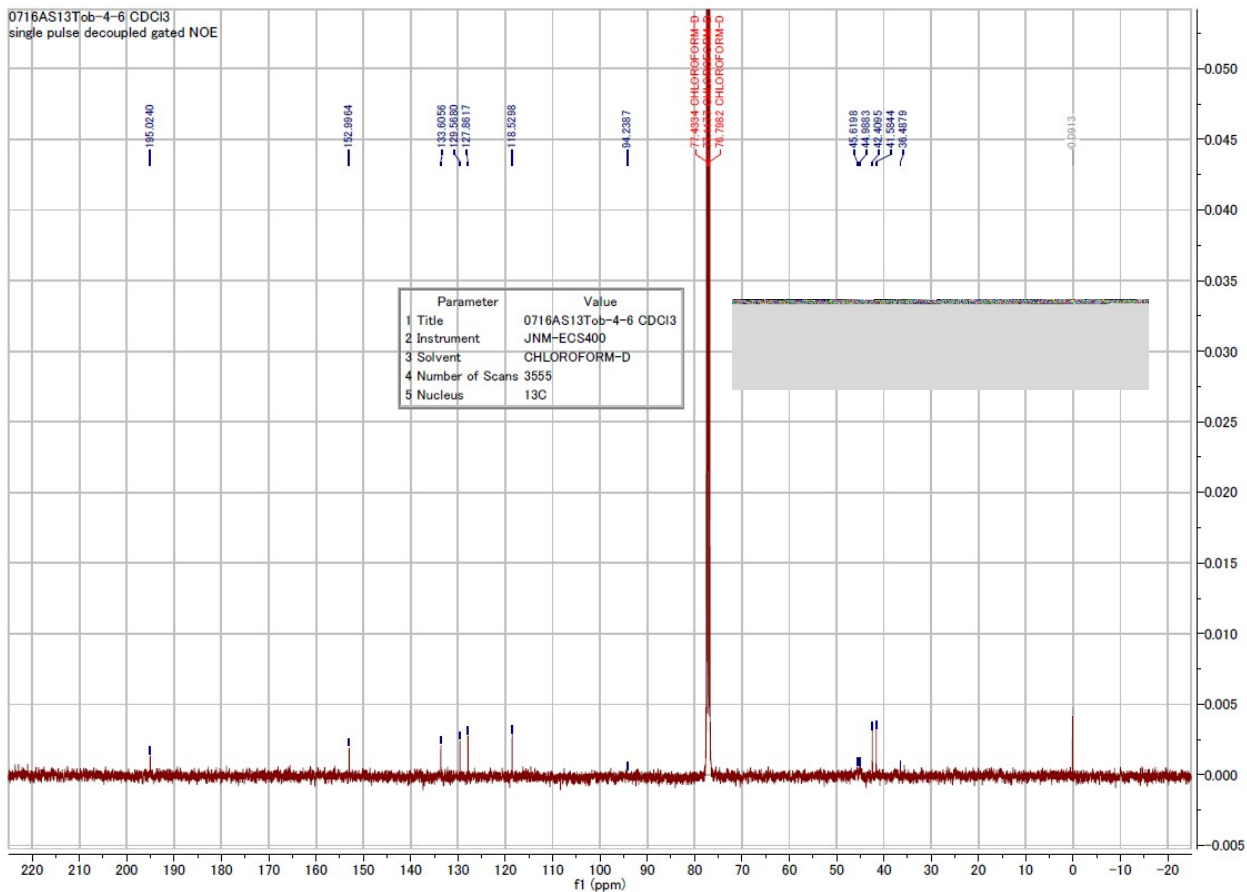

<sup>13</sup>C-NMR (100 MHz) spectroscopic data of **16**. Measured in CDCl<sub>3</sub>.

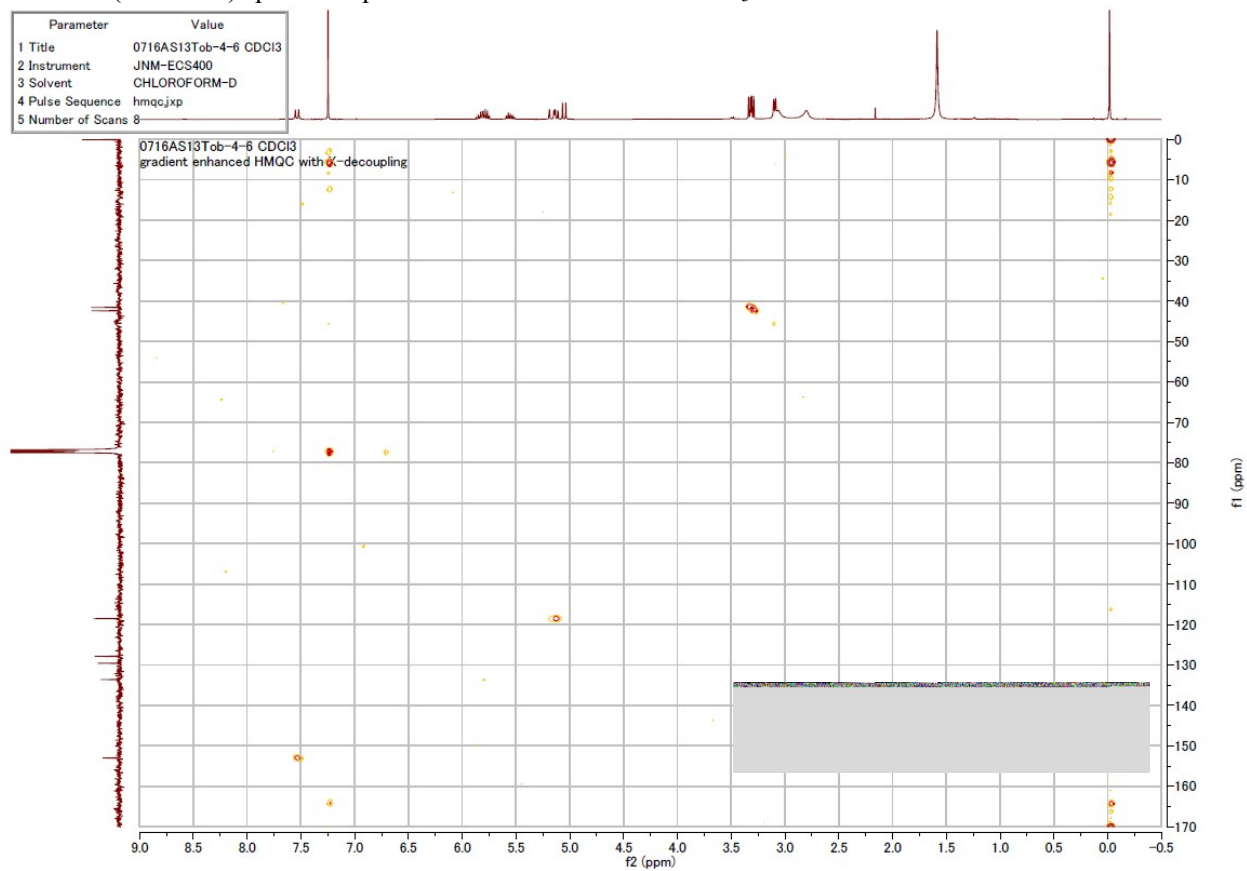

HMQC NMR (400 MHz) spectroscopic data of **16**. Measured in CDCl<sub>3</sub>.

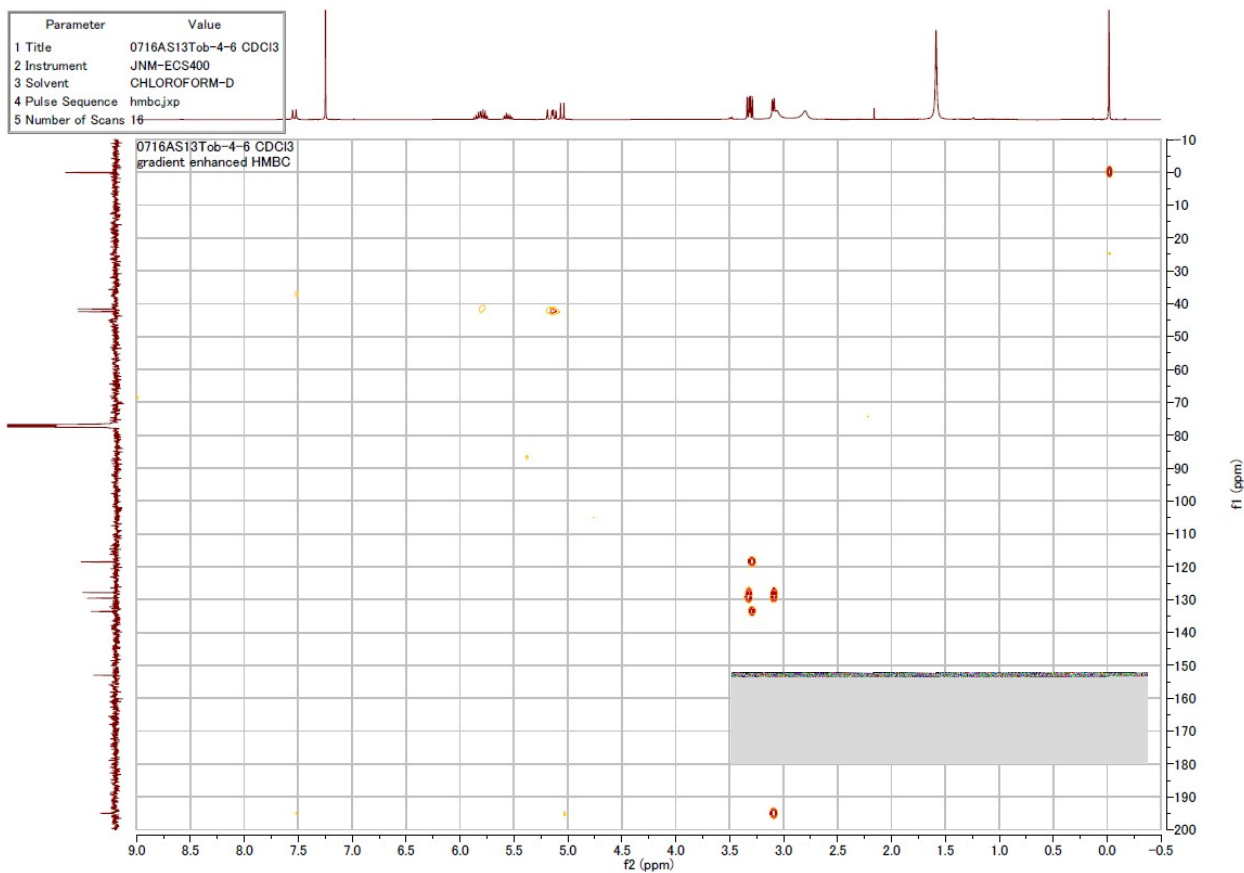

HMBC NMR (400 MHz) spectroscopic data of **16**. Measured in CDCl<sub>3</sub>.

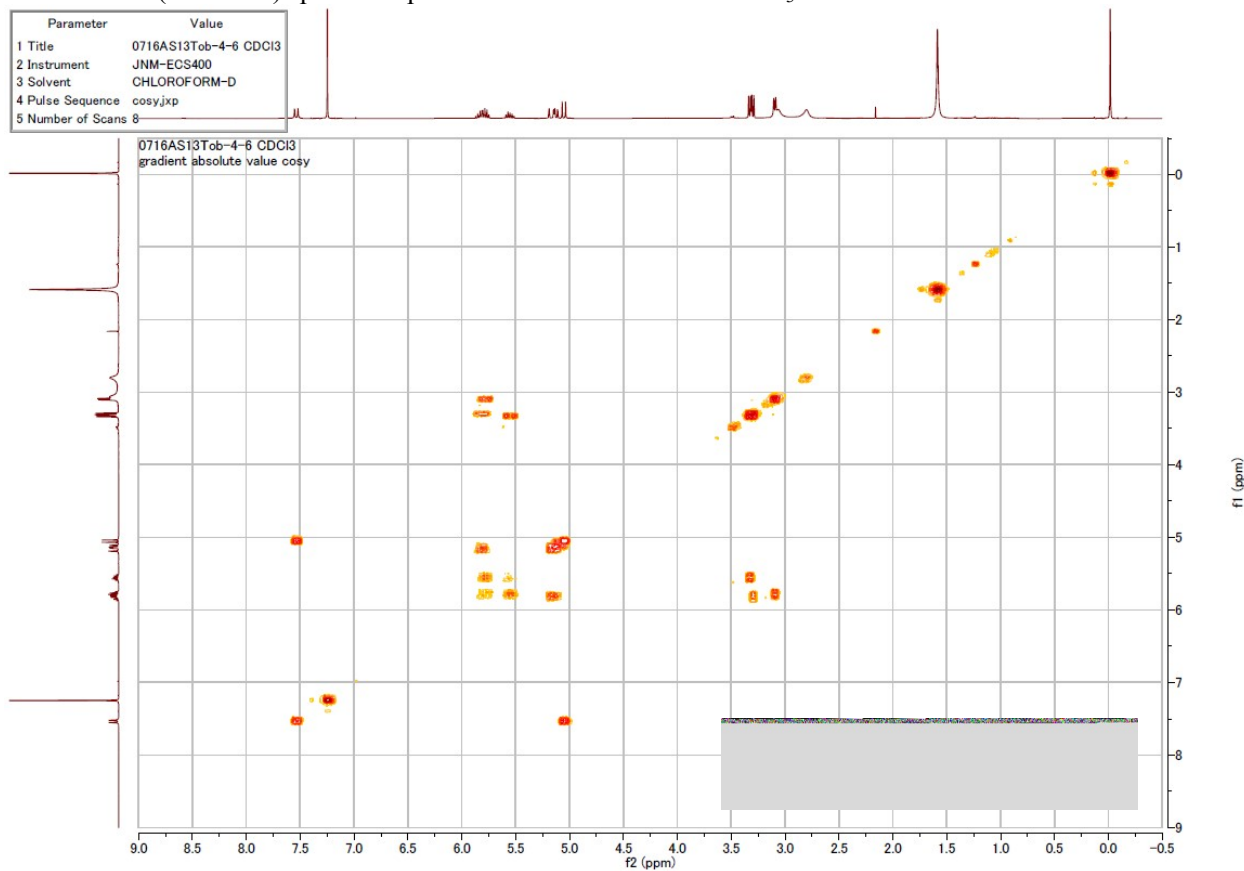

COSY NMR (400 MHz) spectroscopic data of **16**. Measured in CDCl<sub>3</sub>.

# NMR spectroscopic data of 17

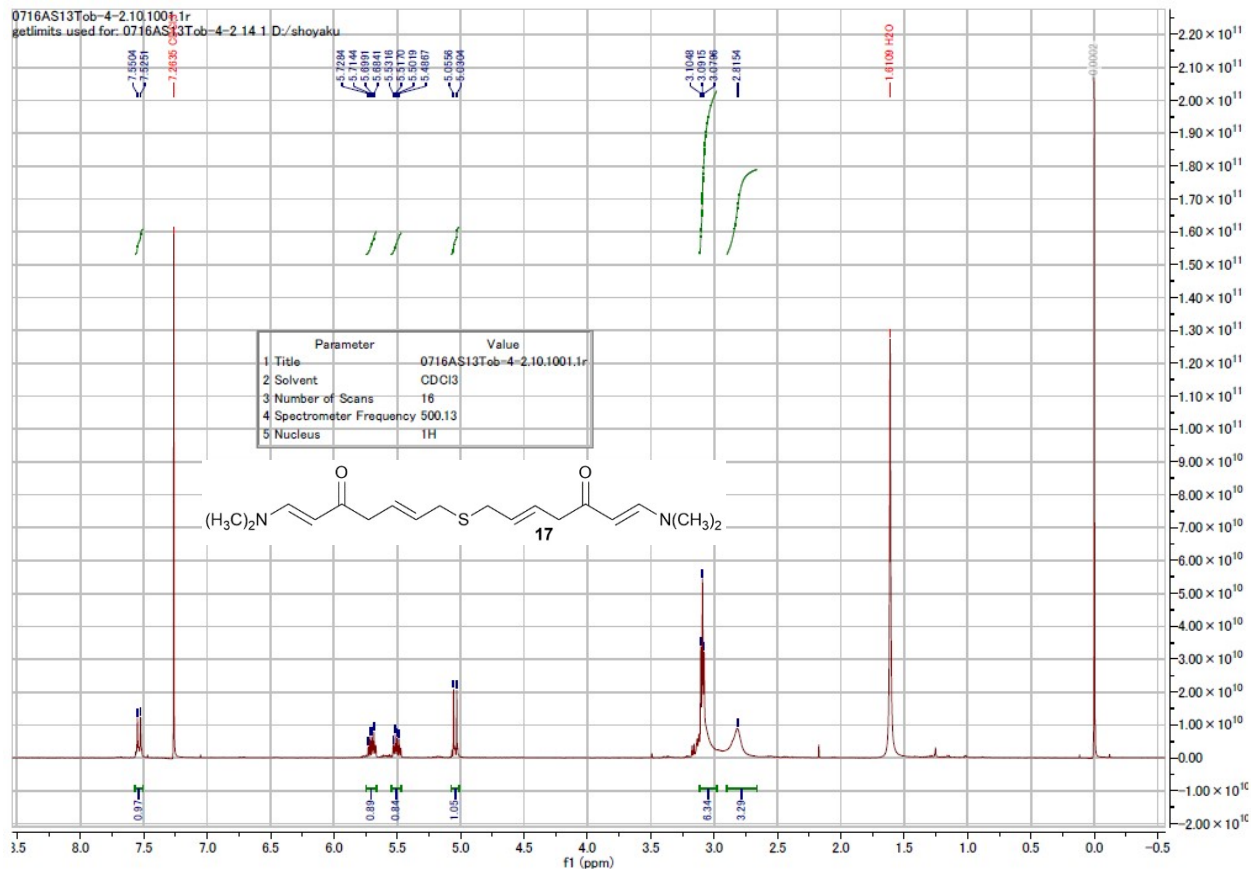

<sup>1</sup>H-NMR (500 MHz) spectroscopic data of 17. Measured in CDCl<sub>3</sub>.

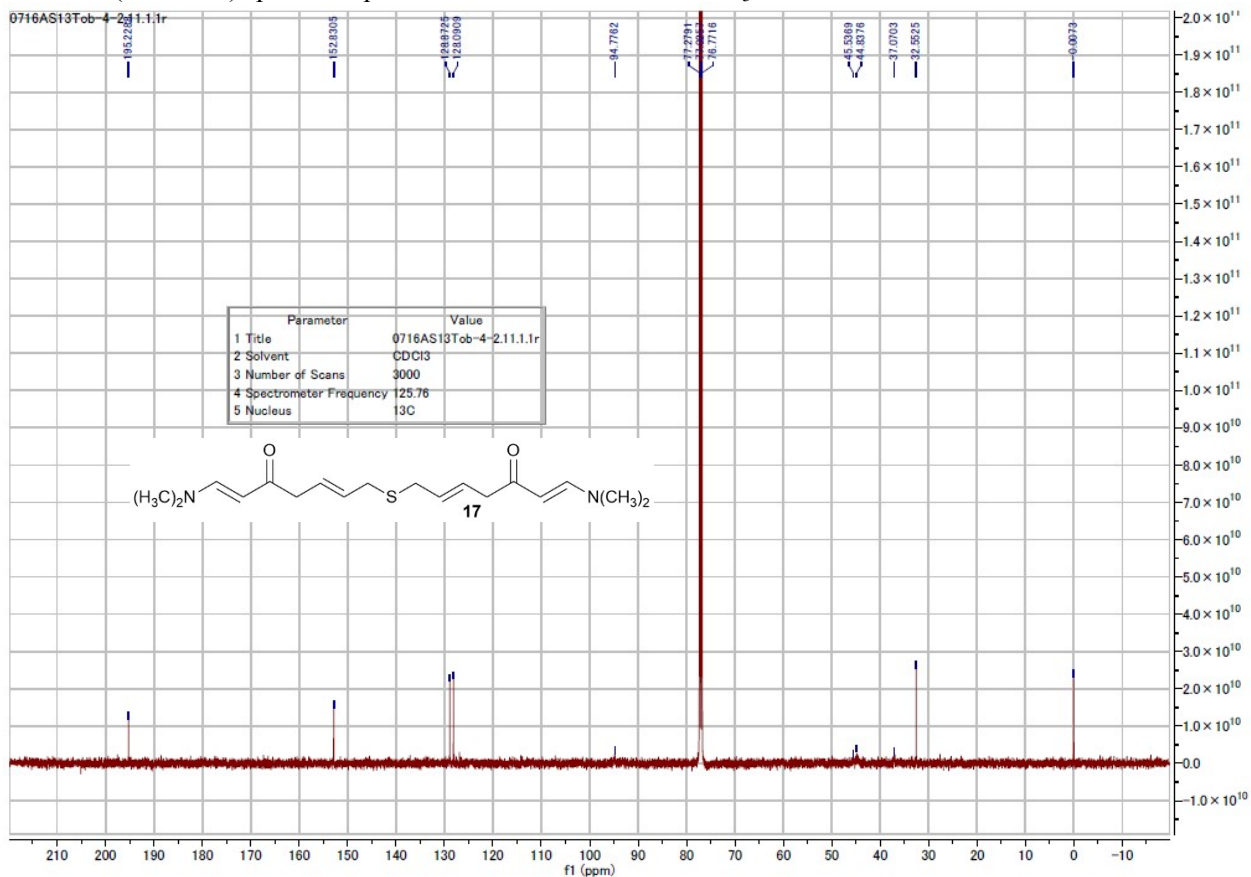

<sup>13</sup>C-NMR (125 MHz) spectroscopic data of 17. Measured in CDCl<sub>3</sub>.

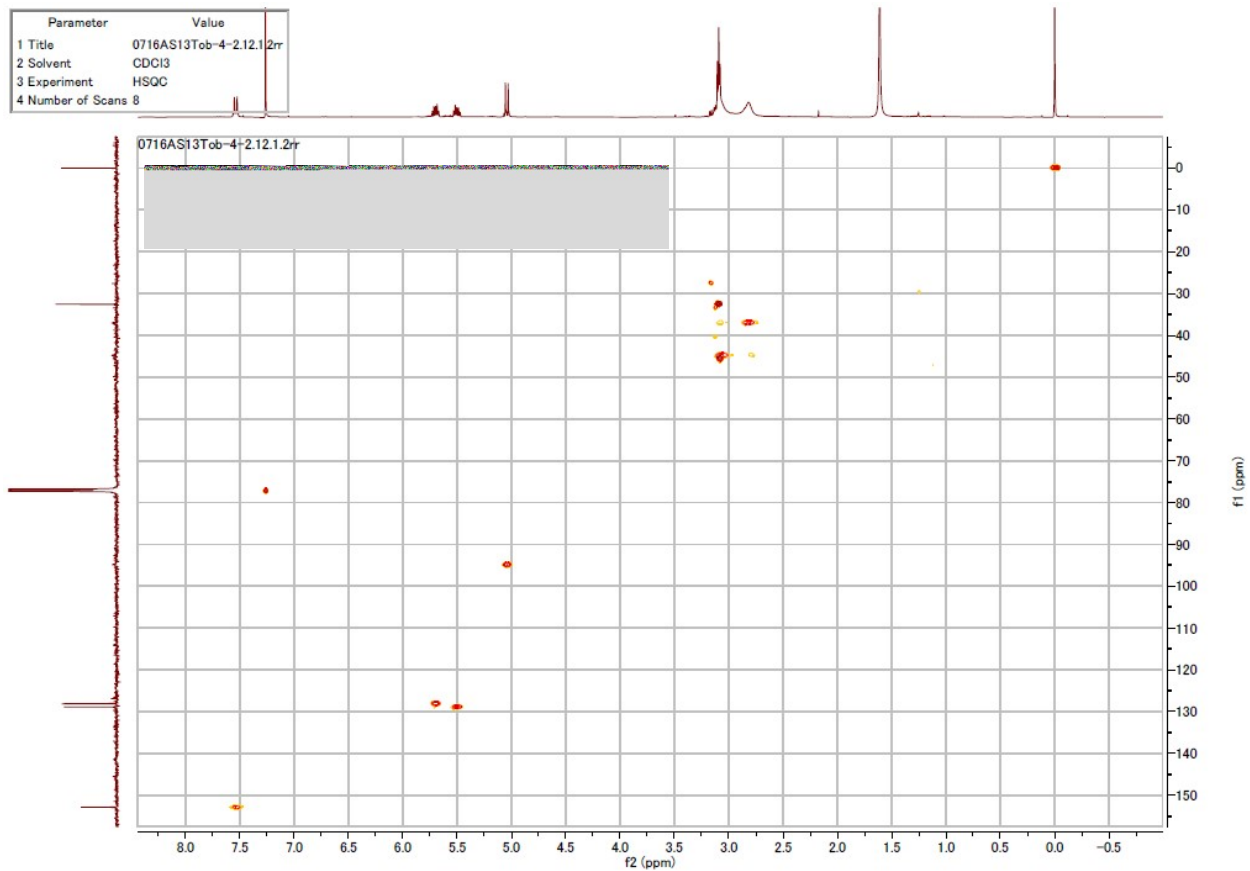

HMQC NMR (500 MHz) spectroscopic data of **17**. Measured in CDCl<sub>3</sub>.

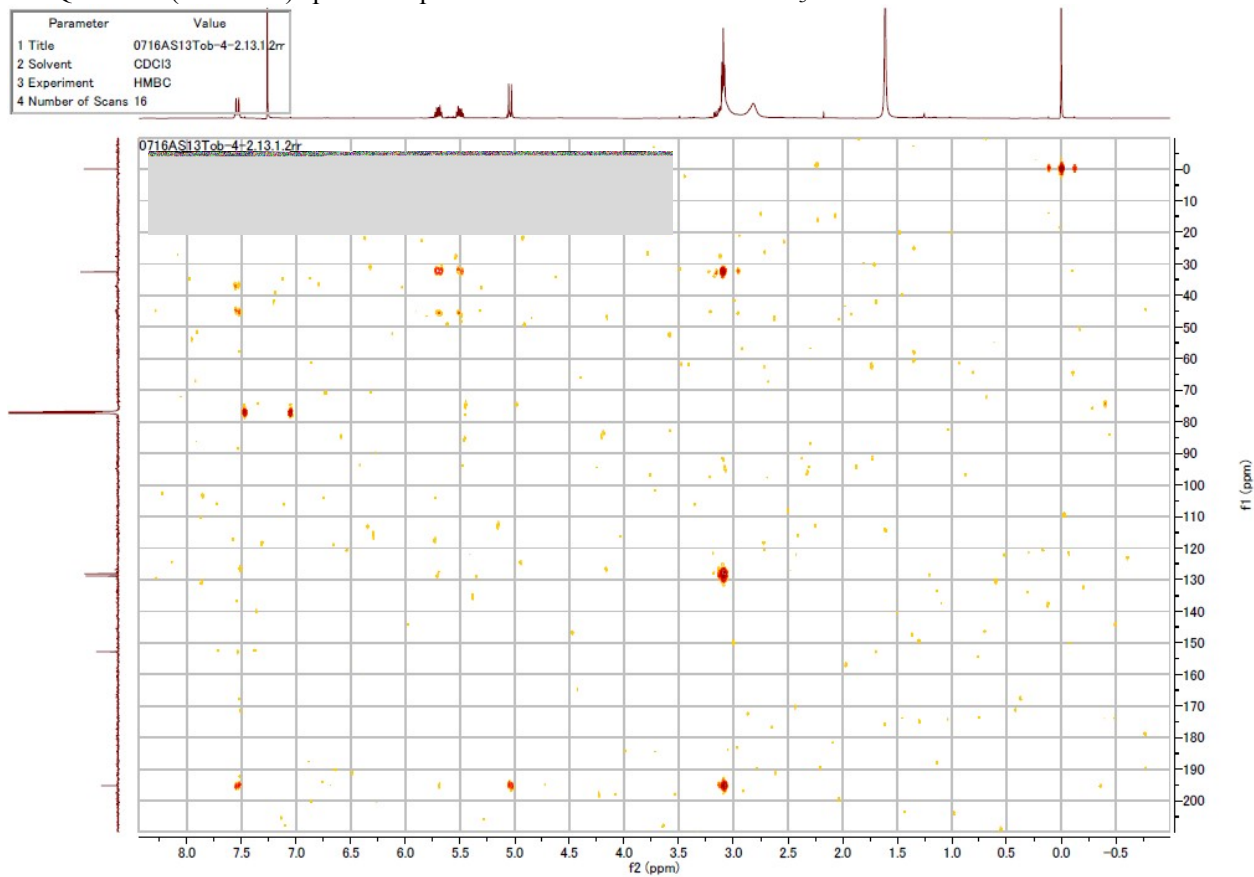

HMBC NMR (500 MHz) spectroscopic data of **17**. Measured in CDCl<sub>3</sub>.



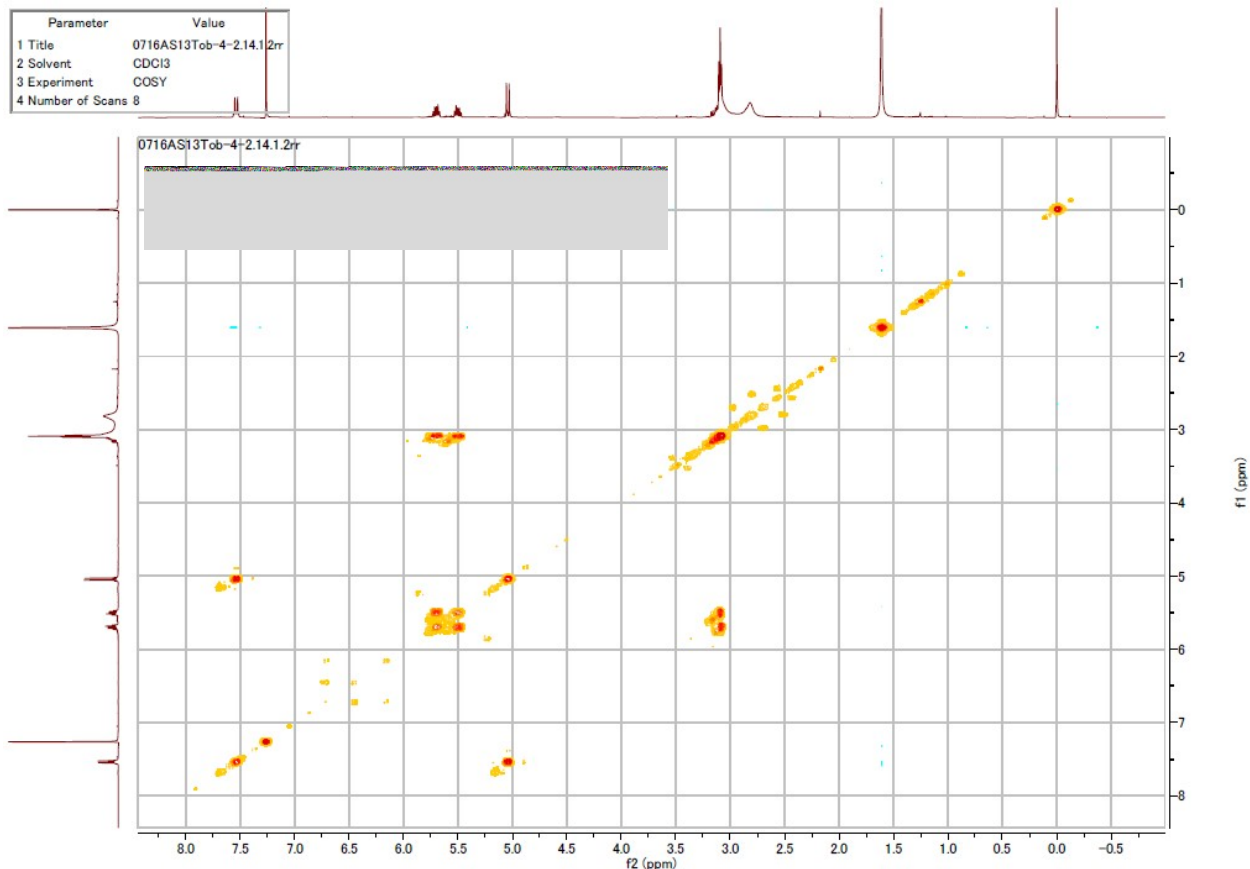

COSY NMR (500 MHz) spectroscopic data of **17**. Measured in CDCl<sub>3</sub>.

### NMR spectroscopic data of **18**

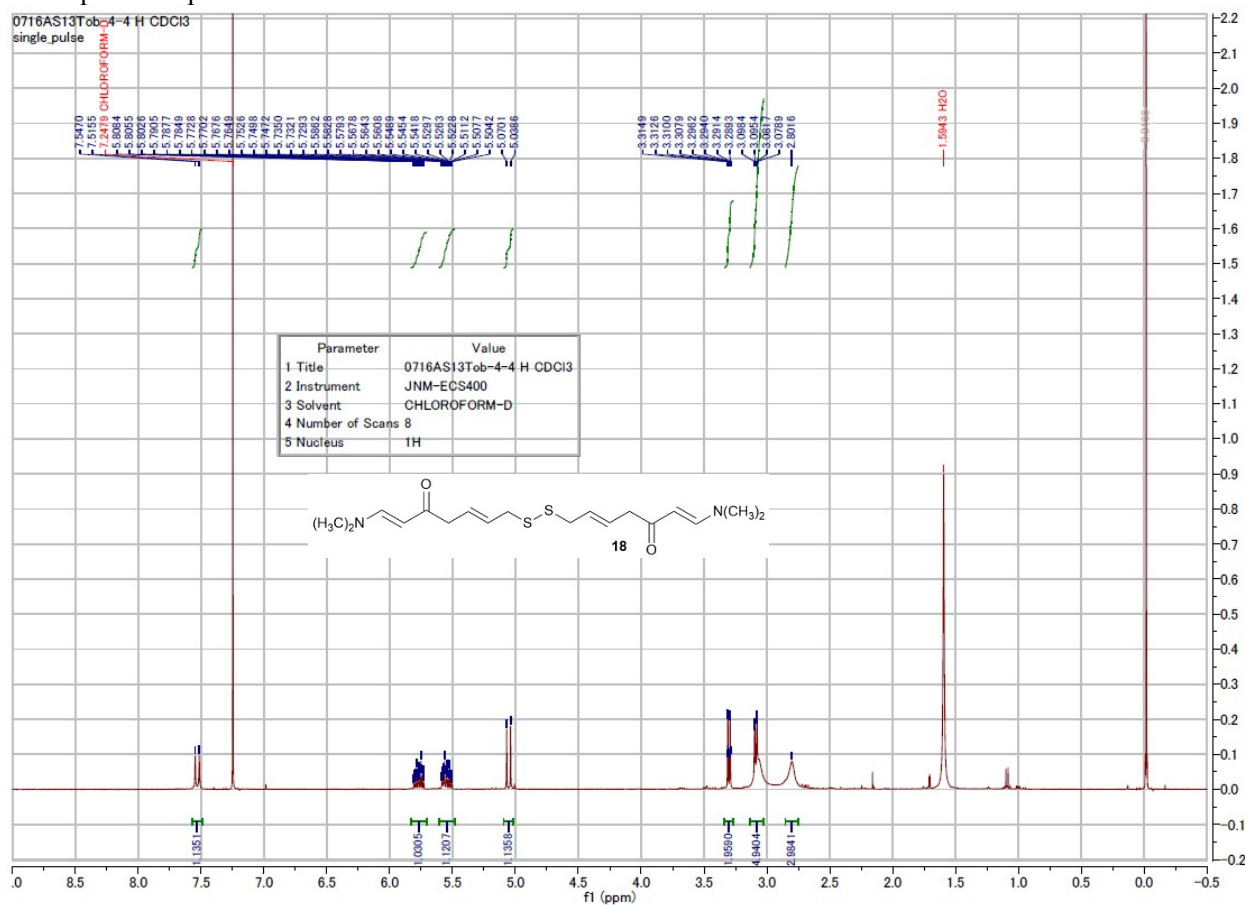

<sup>1</sup>H-NMR (400 MHz) spectroscopic data of **18**. Measured in CDCl<sub>3</sub>.

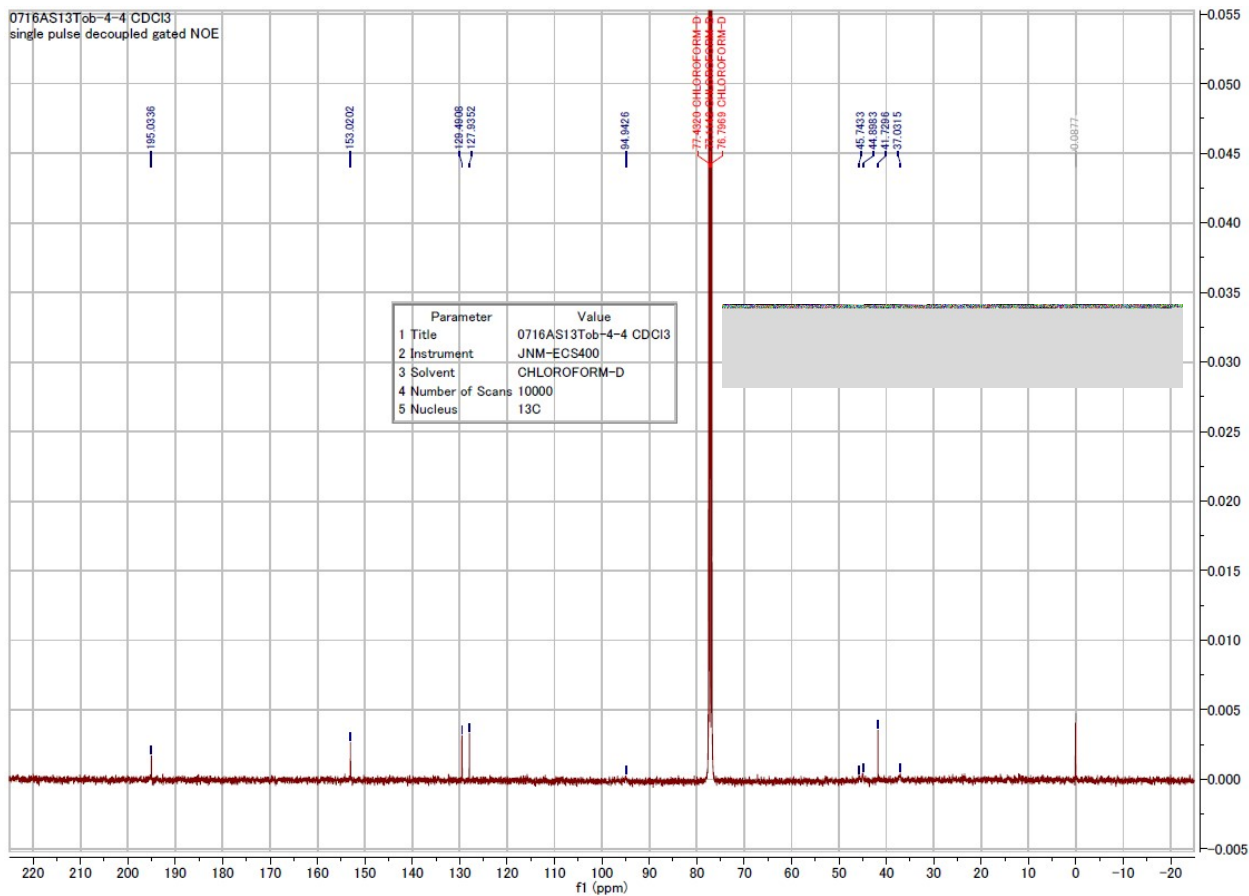

<sup>13</sup>C-NMR (100 MHz) spectroscopic data of **18**. Measured in CDCl<sub>3</sub>.

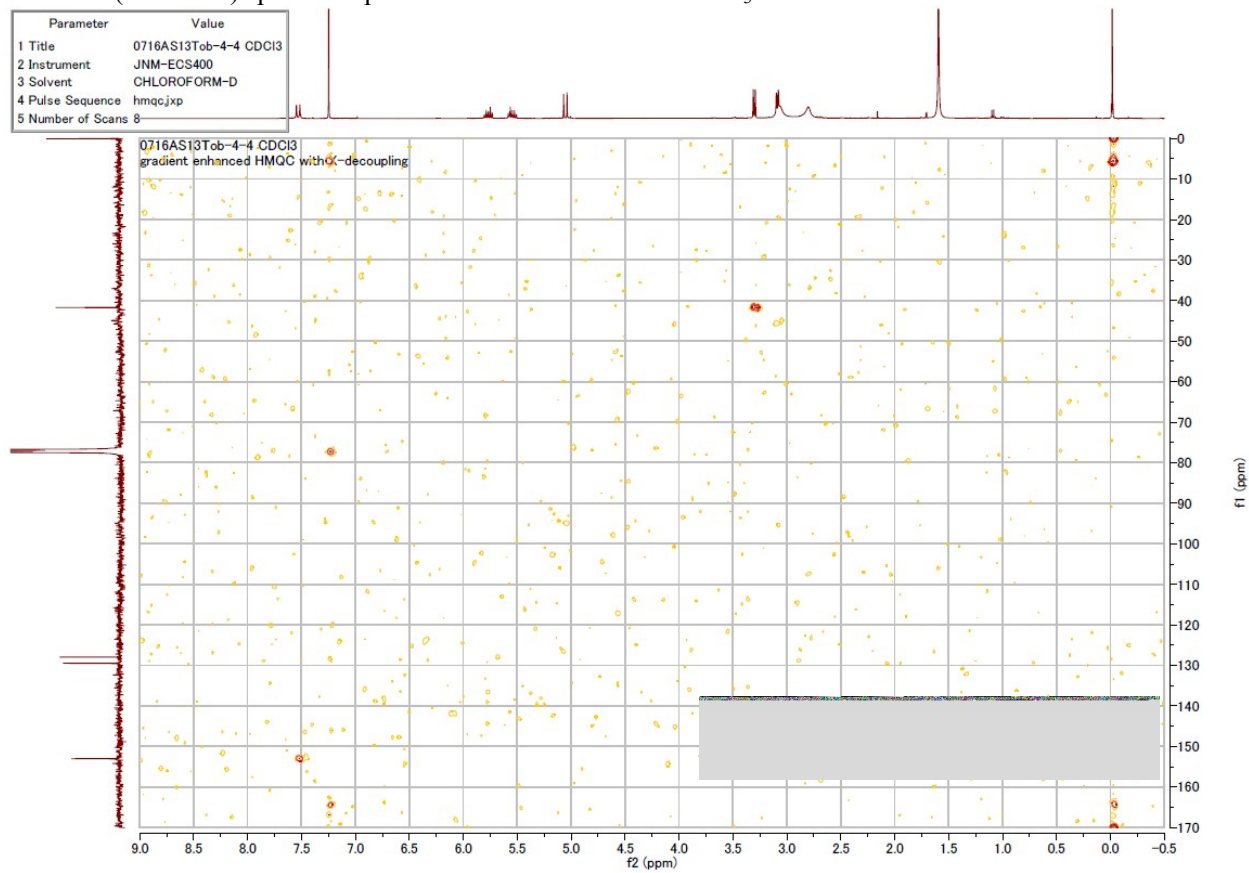

HMQC NMR (400 MHz) spectroscopic data of **18**. Measured in CDCl<sub>3</sub>.



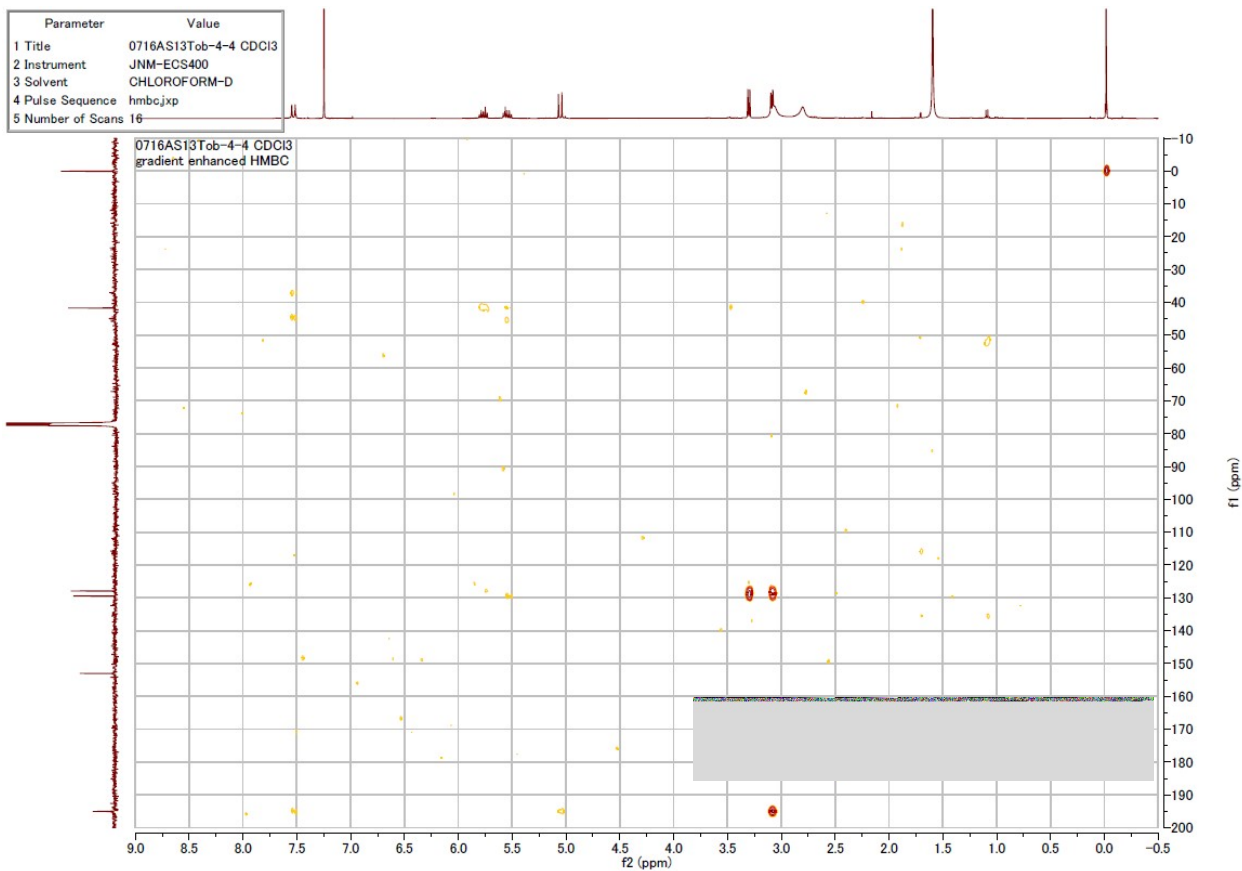

HMBC NMR (400 MHz) spectroscopic data of **18**. Measured in  $\text{CDCl}_3$ .

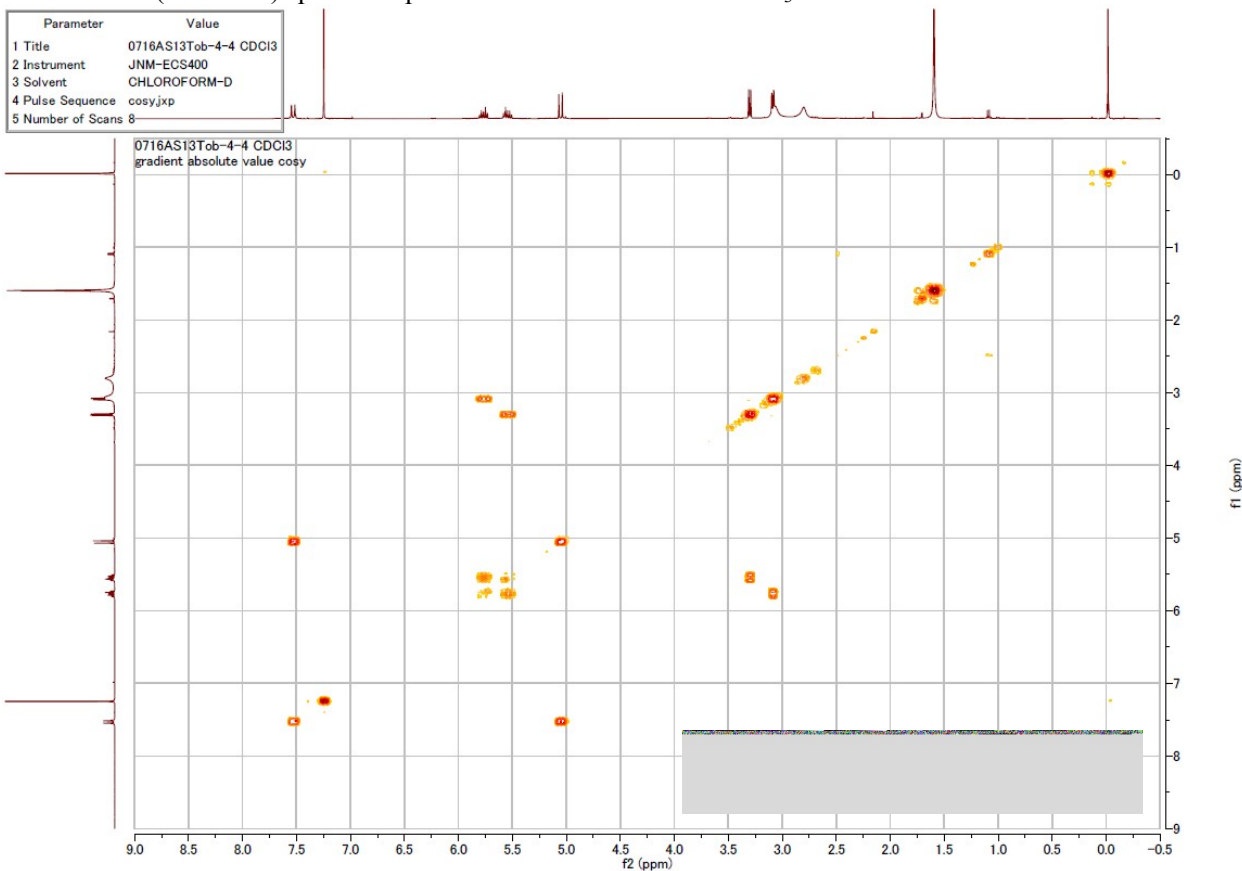

COSY NMR (400 MHz) spectroscopic data of **18**. Measured in  $\text{CDCl}_3$ .

# NMR spectroscopic data of 19

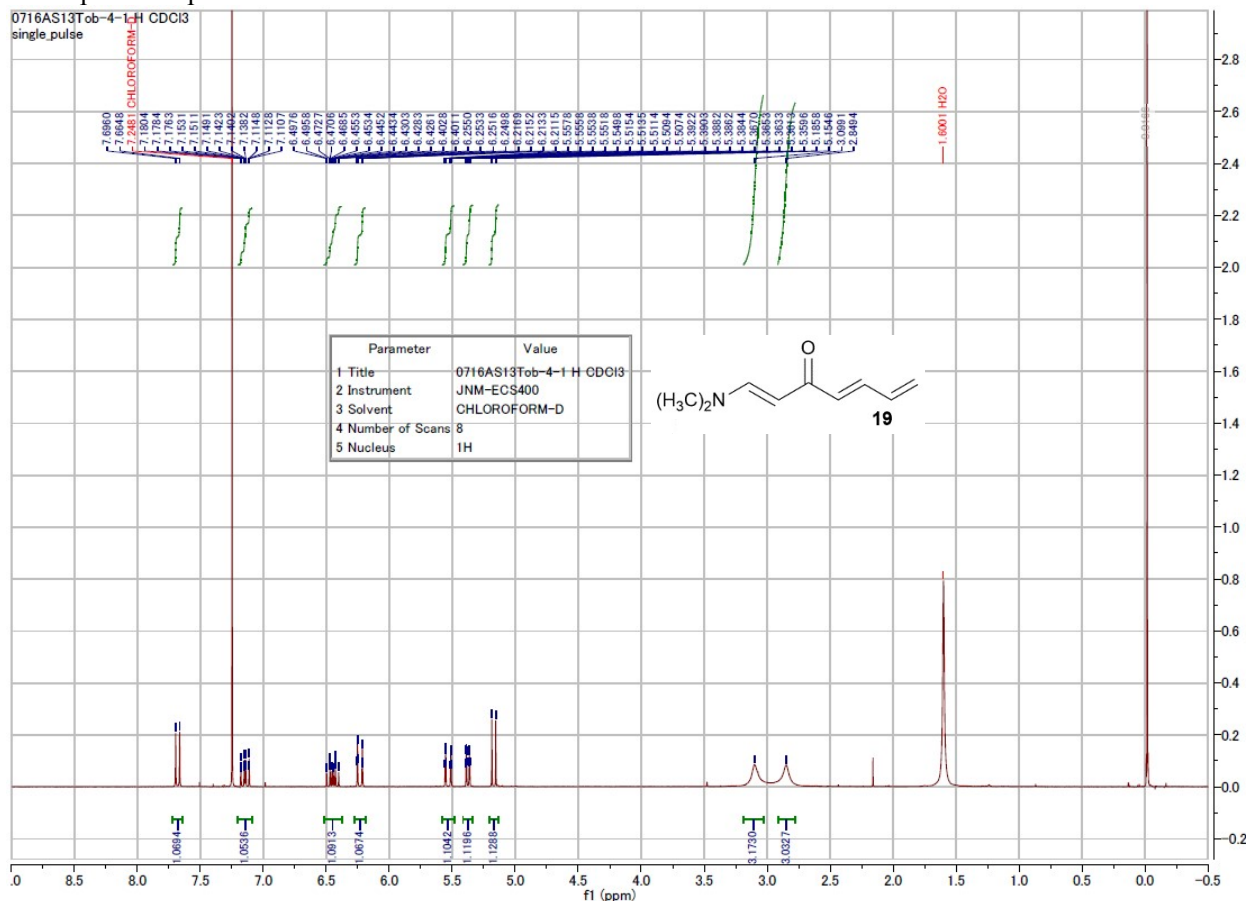

<sup>1</sup>H-NMR (400 MHz) spectroscopic data of 19. Measured in CDCl<sub>3</sub>.

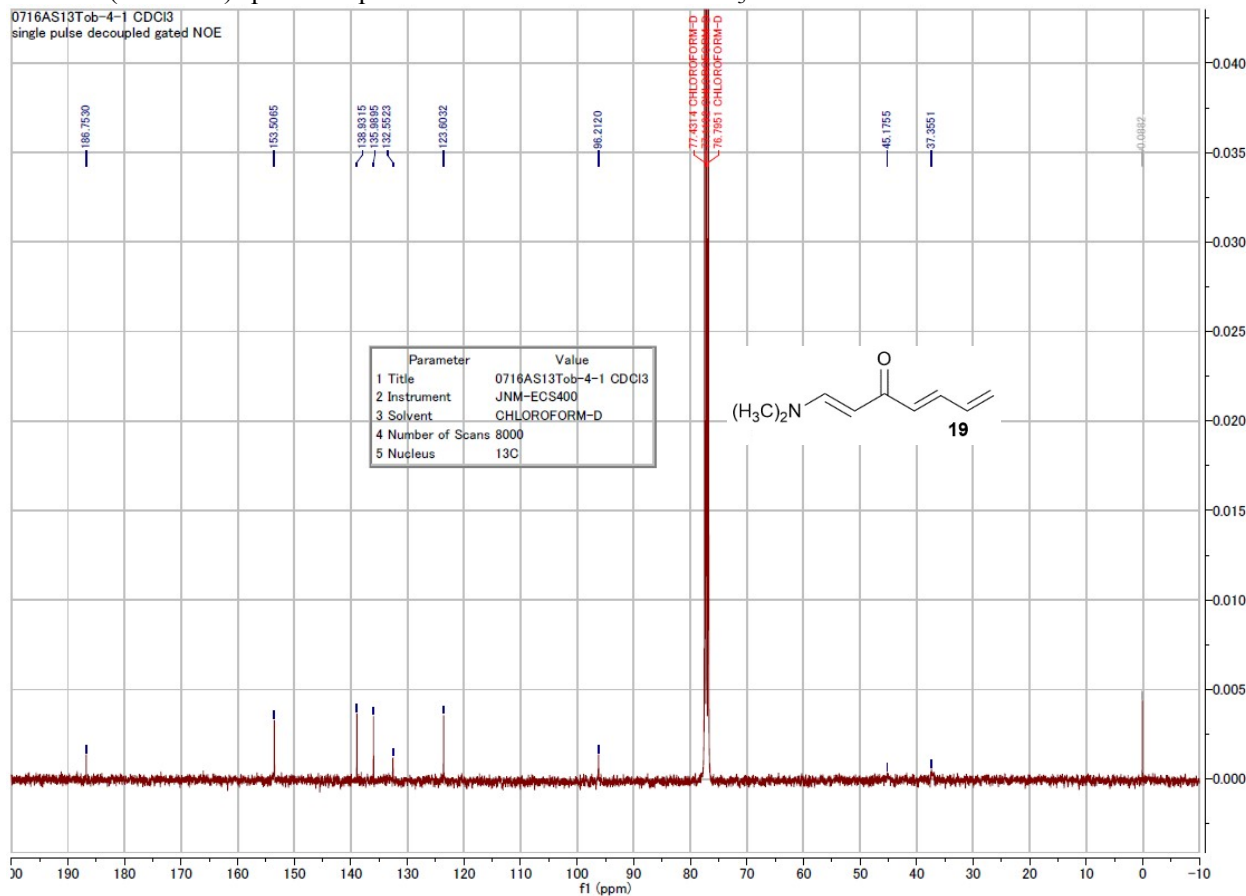

<sup>13</sup>C-NMR (100 MHz) spectroscopic data of 19. Measured in CDCl<sub>3</sub>.

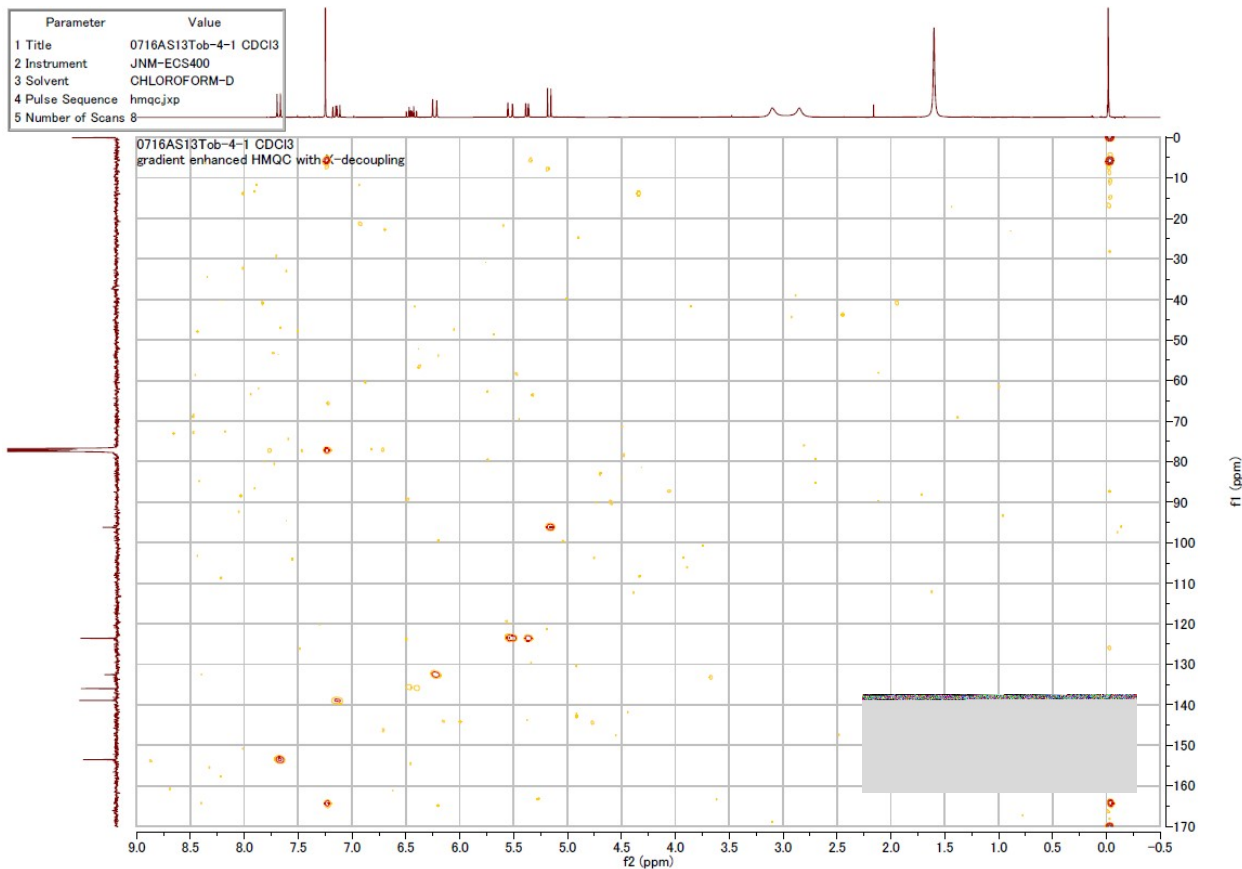

HMQC NMR (400 MHz) spectroscopic data of **19**. Measured in  $CDCl_3$ .

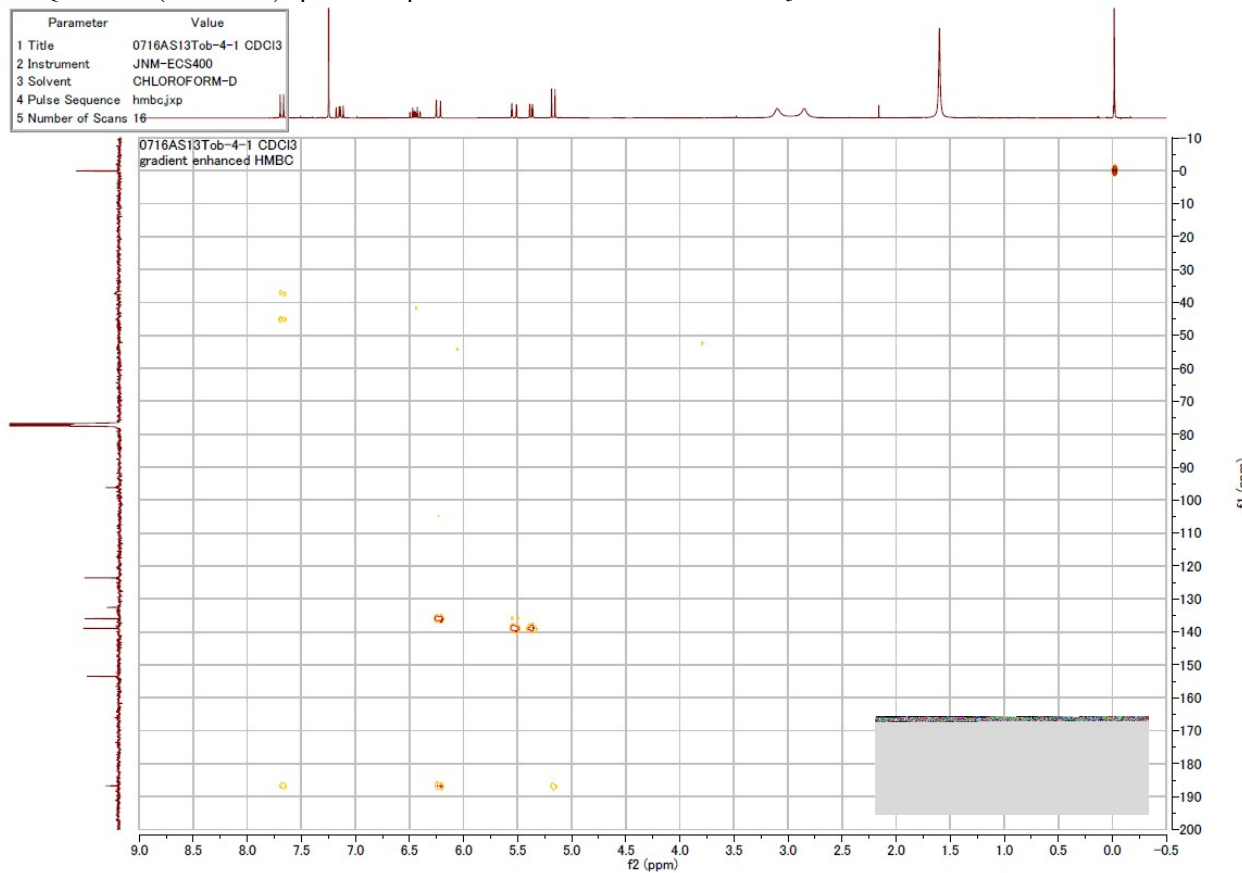

HMBC NMR (400 MHz) spectroscopic data of **19**. Measured in  $CDCl_3$ .

| Parameter         | Value                 |
|-------------------|-----------------------|
| 1 Title           | 0716AS13Tob-4-1 CDCl3 |
| 2 Instrument      | JNM-ECS400            |
| 3 Solvent         | CHLOROFORM-D          |
| 4 Pulse Sequence  | cosyjxp               |
| 5 Number of Scans | 8                     |

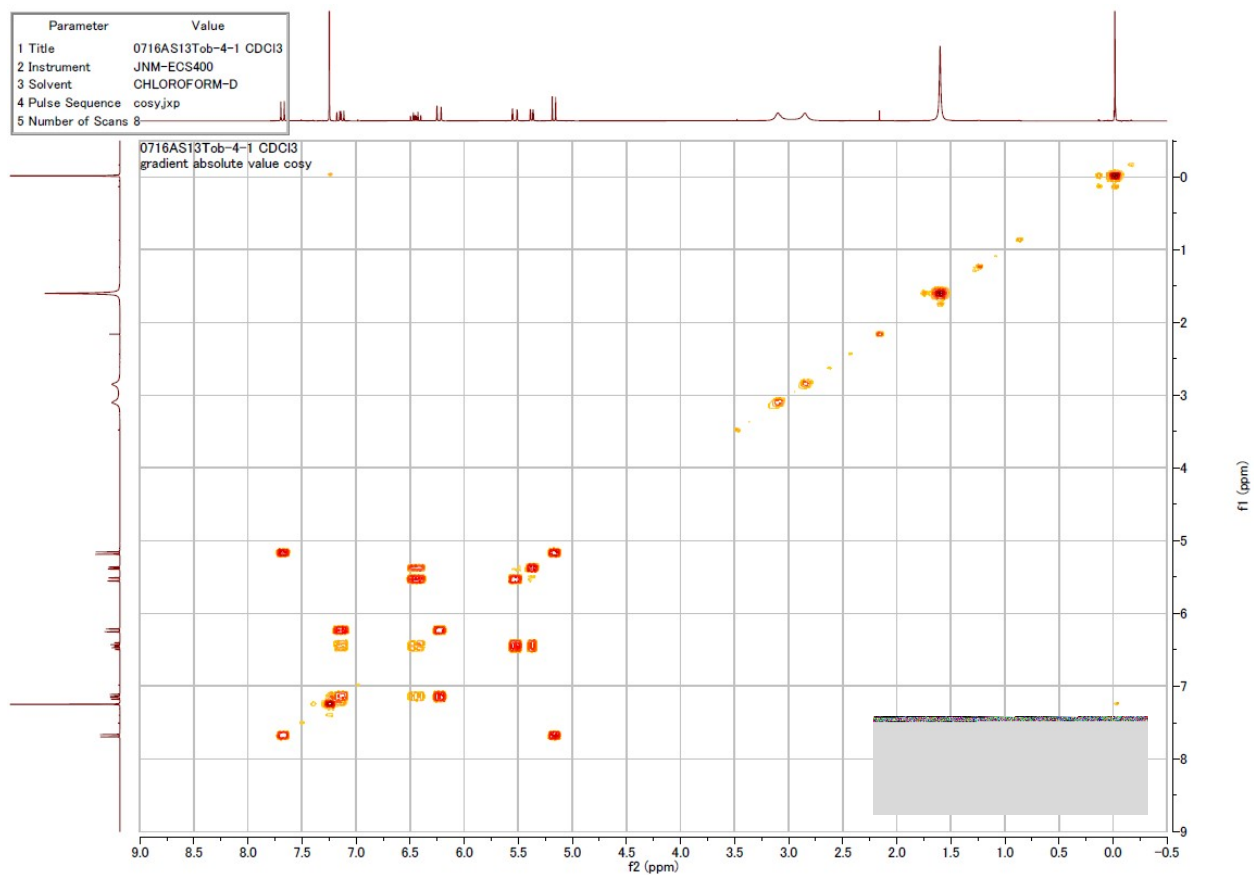

COSY NMR (400 MHz) spectroscopic data of **19**. Measured in CDCl<sub>3</sub>.
